# Supplementary material for: Gut bacterial peptides with autoimmunity potential as environmental trigger for late onset complex diseases: In–silico study
Source: PLoS One. 2017 Jul 5;12(7):e0180518. doi: 10.1371/journal.pone.0180518 (PMC5498033; doi:10.1371/journal.pone.0180518)
Supplement: S3 Table — (XLS) [file pone.0180518.s004.xls]

## Sheet: Sheet1
Supplementary table 3: Location of bacterial candidate proteins on bacterial cell
Gut Bacteria_Genus	Gut Bacterial Phylum	Gut Bacterial species	Hu_homologue	Bac_homologue	Bacterial location	score	%
Acinetobacter	Proteobacteria	Acinetobacter baylyi	sp|Q9NUT2|ABCB8_HUMAN ATP-binding cassette sub-family B member 8, mitochondrial OS=Homo sapiens GN=ABCB8 PE=1 SV=3	sp|Q6F9X0|MSBA_ACIAD Lipid A export ATP-binding/permease protein MsbA OS=Acinetobacter baylyi (strain ATCC 33305 / BD413 / ADP1) GN=msbA PE=3 SV=1	Cytoplasmic Protein	4	90.2
Acinetobacter	Proteobacteria	Acinetobacter baylyi	sp|O60706|ABCC9_HUMAN ATP-binding cassette sub-family C member 9 OS=Homo sapiens GN=ABCC9 PE=1 SV=2	sp|Q6F9A8|CYSA_ACIAD Sulfate/thiosulfate import ATP-binding protein CysA OS=Acinetobacter baylyi (strain ATCC 33305 / BD413 / ADP1) GN=cysA PE=3 SV=1	Cytoplasmic Protein	4	90.2
Acinetobacter	Proteobacteria	Acinetobacter baylyi	sp|P45844|ABCG1_HUMAN ATP-binding cassette sub-family G member 1 OS=Homo sapiens GN=ABCG1 PE=1 SV=3	sp|Q6F813|MACB_ACIAD Macrolide export ATP-binding/permease protein MacB OS=Acinetobacter baylyi (strain ATCC 33305 / BD413 / ADP1) GN=macB PE=3 SV=1	Cytoplasmic Protein	4	90.2
Acinetobacter	Proteobacteria	Acinetobacter sp.	sp|P51648|AL3A2_HUMAN Fatty aldehyde dehydrogenase OS=Homo sapiens GN=ALDH3A2 PE=1 SV=1	sp|Q9FDS1|ALD1_ACISP Long-chain-aldehyde dehydrogenase OS=Acinetobacter sp. GN=ald1 PE=1 SV=1	Cytoplasmic Protein	1	53.1
Acinetobacter	Proteobacteria	Acinetobacter baylyi	sp|P43353|AL3B1_HUMAN Aldehyde dehydrogenase family 3 member B1 OS=Homo sapiens GN=ALDH3B1 PE=1 SV=1	sp|Q6FCQ0|ASTD_ACIAD N-succinylglutamate 5-semialdehyde dehydrogenase OS=Acinetobacter baylyi (strain ATCC 33305 / BD413 / ADP1) GN=astD PE=3 SV=1	Cytoplasmic Protein	1	53.1
Acinetobacter	Proteobacteria	Acinetobacter baumannii	sp|Q3SY69|AL1L2_HUMAN Mitochondrial 10-formyltetrahydrofolate dehydrogenase OS=Homo sapiens GN=ALDH1L2 PE=1 SV=2	sp|A3M365|BETB_ACIBT NAD/NADP-dependent betaine aldehyde dehydrogenase OS=Acinetobacter baumannii (strain ATCC 17978 / CIP 53.77 / LMG 1025 / NCDC KC755 / 5377) GN=betB PE=3 SV=2	Cytoplasmic Protein	4	90.2
Acinetobacter	Proteobacteria	Acinetobacter baumannii	sp|Q3SY69|AL1L2_HUMAN Mitochondrial 10-formyltetrahydrofolate dehydrogenase OS=Homo sapiens GN=ALDH1L2 PE=1 SV=2	sp|B2HV80|BETB_ACIBC NAD/NADP-dependent betaine aldehyde dehydrogenase OS=Acinetobacter baumannii (strain ACICU) GN=betB PE=3 SV=1	Cytoplasmic Protein	4	90.2
Acinetobacter	Proteobacteria	Acinetobacter baumannii	sp|Q3SY69|AL1L2_HUMAN Mitochondrial 10-formyltetrahydrofolate dehydrogenase OS=Homo sapiens GN=ALDH1L2 PE=1 SV=2	sp|B0V944|BETB_ACIBY NAD/NADP-dependent betaine aldehyde dehydrogenase OS=Acinetobacter baumannii (strain AYE) GN=betB PE=3 SV=1	Cytoplasmic Protein	1	53.1
Acinetobacter	Proteobacteria	Acinetobacter baumannii	sp|Q3SY69|AL1L2_HUMAN Mitochondrial 10-formyltetrahydrofolate dehydrogenase OS=Homo sapiens GN=ALDH1L2 PE=1 SV=2	sp|B7I896|BETB_ACIB5 NAD/NADP-dependent betaine aldehyde dehydrogenase OS=Acinetobacter baumannii (strain AB0057) GN=betB PE=3 SV=1	Cytoplasmic Protein	4	90.2
Acinetobacter	Proteobacteria	Acinetobacter baumannii	sp|Q3SY69|AL1L2_HUMAN Mitochondrial 10-formyltetrahydrofolate dehydrogenase OS=Homo sapiens GN=ALDH1L2 PE=1 SV=2	sp|B7GYG4|BETB_ACIB3 NAD/NADP-dependent betaine aldehyde dehydrogenase OS=Acinetobacter baumannii (strain AB307-0294) GN=betB PE=3 SV=1	Cytoplasmic Protein	4	90.2
Acinetobacter	Proteobacteria	Acinetobacter baylyi	sp|Q3SY69|AL1L2_HUMAN Mitochondrial 10-formyltetrahydrofolate dehydrogenase OS=Homo sapiens GN=ALDH1L2 PE=1 SV=2	sp|Q6FDF8|BETB_ACIAD NAD/NADP-dependent betaine aldehyde dehydrogenase OS=Acinetobacter baylyi (strain ATCC 33305 / BD413 / ADP1) GN=betB PE=3 SV=1	Cytoplasmic Protein	4	90.2
Acinetobacter	Proteobacteria	Acinetobacter baumannii	sp|Q3SY69|AL1L2_HUMAN Mitochondrial 10-formyltetrahydrofolate dehydrogenase OS=Homo sapiens GN=ALDH1L2 PE=1 SV=2	sp|B0VST2|BETB_ACIBS NAD/NADP-dependent betaine aldehyde dehydrogenase OS=Acinetobacter baumannii (strain SDF) GN=betB PE=3 SV=1	Cytoplasmic Protein	4	90.2
Acinetobacter	Proteobacteria	Acinetobacter baumannii	sp|Q8N6M5|ALLC_HUMAN Probable allantoicase OS=Homo sapiens GN=ALLC PE=2 SV=3	sp|A3MA02|ALLC_ACIBT Probable allantoicase OS=Acinetobacter baumannii (strain ATCC 17978 / CIP 53.77 / LMG 1025 / NCDC KC755 / 5377) GN=alc PE=3 SV=2	Cytoplasmic Protein	4	90.2
Acinetobacter	Proteobacteria	Acinetobacter baumannii	sp|Q8N6M5|ALLC_HUMAN Probable allantoicase OS=Homo sapiens GN=ALLC PE=2 SV=3	sp|B0VP26|ALLC_ACIBS Probable allantoicase OS=Acinetobacter baumannii (strain SDF) GN=alc PE=3 SV=1	Cytoplasmic Protein	1	53.1
Acinetobacter	Proteobacteria	Acinetobacter baumannii	sp|Q8N6M5|ALLC_HUMAN Probable allantoicase OS=Homo sapiens GN=ALLC PE=2 SV=3	sp|B0V9T8|ALLC_ACIBY Probable allantoicase OS=Acinetobacter baumannii (strain AYE) GN=alc PE=3 SV=1	Cytoplasmic Protein	4	90.2
Acinetobacter	Proteobacteria	Acinetobacter baumannii	sp|Q8N6M5|ALLC_HUMAN Probable allantoicase OS=Homo sapiens GN=ALLC PE=2 SV=3	sp|B7GV54|ALLC_ACIB3 Probable allantoicase OS=Acinetobacter baumannii (strain AB307-0294) GN=alc PE=3 SV=1	Cytoplasmic Protein	4	90.2
Acinetobacter	Proteobacteria	Acinetobacter baumannii	sp|Q8N6M5|ALLC_HUMAN Probable allantoicase OS=Homo sapiens GN=ALLC PE=2 SV=3	sp|B7ICG5|ALLC_ACIB5 Probable allantoicase OS=Acinetobacter baumannii (strain AB0057) GN=alc PE=3 SV=1	Cytoplasmic Protein	1	53.1
Acinetobacter	Proteobacteria	Acinetobacter baumannii	sp|Q8N6M5|ALLC_HUMAN Probable allantoicase OS=Homo sapiens GN=ALLC PE=2 SV=3	sp|B2I1L5|ALLC_ACIBC Probable allantoicase OS=Acinetobacter baumannii (strain ACICU) GN=alc PE=3 SV=1	Cytoplasmic Protein	4	90.2
Acinetobacter	Proteobacteria	Acinetobacter baylyi	sp|Q8N6M5|ALLC_HUMAN Probable allantoicase OS=Homo sapiens GN=ALLC PE=2 SV=3	sp|Q6F6Y1|ALLC_ACIAD Probable allantoicase OS=Acinetobacter baylyi (strain ATCC 33305 / BD413 / ADP1) GN=alc PE=3 SV=1	Cytoplasmic Protein	4	90.2
Acinetobacter	Proteobacteria	Acinetobacter baumannii	sp|P04424|ARLY_HUMAN Argininosuccinate lyase OS=Homo sapiens GN=ASL PE=1 SV=4	sp|B0VDE4|ARLY_ACIBY Argininosuccinate lyase OS=Acinetobacter baumannii (strain AYE) GN=argH PE=3 SV=1	Cytoplasmic Protein	4	90.2
Acinetobacter	Proteobacteria	Acinetobacter baumannii	sp|P04424|ARLY_HUMAN Argininosuccinate lyase OS=Homo sapiens GN=ASL PE=1 SV=4	sp|B7H1L9|ARLY_ACIB3 Argininosuccinate lyase OS=Acinetobacter baumannii (strain AB307-0294) GN=argH PE=3 SV=1	Cytoplasmic Protein	4	90.2
Acinetobacter	Proteobacteria	Acinetobacter baumannii	sp|P04424|ARLY_HUMAN Argininosuccinate lyase OS=Homo sapiens GN=ASL PE=1 SV=4	sp|B7I338|ARLY_ACIB5 Argininosuccinate lyase OS=Acinetobacter baumannii (strain AB0057) GN=argH PE=3 SV=1	Cytoplasmic Protein	5	98.1
Acinetobacter	Proteobacteria	Acinetobacter baumannii	sp|P04424|ARLY_HUMAN Argininosuccinate lyase OS=Homo sapiens GN=ASL PE=1 SV=4	sp|A3M1E0|ARLY_ACIBT Argininosuccinate lyase OS=Acinetobacter baumannii (strain ATCC 17978 / CIP 53.77 / LMG 1025 / NCDC KC755 / 5377) GN=argH PE=3 SV=2	Cytoplasmic Protein	4	90.2
Acinetobacter	Proteobacteria	Acinetobacter baumannii	sp|P04424|ARLY_HUMAN Argininosuccinate lyase OS=Homo sapiens GN=ASL PE=1 SV=4	sp|B0VMC7|ARLY_ACIBS Argininosuccinate lyase OS=Acinetobacter baumannii (strain SDF) GN=argH PE=3 SV=1	Cytoplasmic Protein	1	53.1
Acinetobacter	Proteobacteria	Acinetobacter baumannii	sp|P04424|ARLY_HUMAN Argininosuccinate lyase OS=Homo sapiens GN=ASL PE=1 SV=4	sp|B2I1W9|ARLY_ACIBC Argininosuccinate lyase OS=Acinetobacter baumannii (strain ACICU) GN=argH PE=3 SV=1	Cytoplasmic Protein	4	90.2
Acinetobacter	Proteobacteria	Acinetobacter baylyi	sp|P04424|ARLY_HUMAN Argininosuccinate lyase OS=Homo sapiens GN=ASL PE=1 SV=4	sp|Q6FFB2|ARLY_ACIAD Argininosuccinate lyase OS=Acinetobacter baylyi (strain ATCC 33305 / BD413 / ADP1) GN=argH PE=3 SV=1	Cytoplasmic Protein	1	53.1
Acinetobacter	Proteobacteria	Acinetobacter baylyi	sp|P25705|ATPA_HUMAN ATP synthase subunit alpha, mitochondrial OS=Homo sapiens GN=ATP5A1 PE=1 SV=1	sp|Q6FFK2|ATPA_ACIAD ATP synthase subunit alpha OS=Acinetobacter baylyi (strain ATCC 33305 / BD413 / ADP1) GN=atpA PE=3 SV=1	Cytoplasmic Protein	4	90.2
Acinetobacter	Proteobacteria	Acinetobacter baumannii	sp|P25705|ATPA_HUMAN ATP synthase subunit alpha, mitochondrial OS=Homo sapiens GN=ATP5A1 PE=1 SV=1	sp|B0VBP5|ATPA_ACIBY ATP synthase subunit alpha OS=Acinetobacter baumannii (strain AYE) GN=atpA PE=3 SV=2	Cytoplasmic Protein	4	90.2
Acinetobacter	Proteobacteria	Acinetobacter baumannii	sp|P25705|ATPA_HUMAN ATP synthase subunit alpha, mitochondrial OS=Homo sapiens GN=ATP5A1 PE=1 SV=1	sp|B7I1W2|ATPA_ACIB5 ATP synthase subunit alpha OS=Acinetobacter baumannii (strain AB0057) GN=atpA PE=3 SV=1	Cytoplasmic Protein	1	53.1
Acinetobacter	Proteobacteria	Acinetobacter baumannii	sp|P25705|ATPA_HUMAN ATP synthase subunit alpha, mitochondrial OS=Homo sapiens GN=ATP5A1 PE=1 SV=1	sp|B2I100|ATPA_ACIBC ATP synthase subunit alpha OS=Acinetobacter baumannii (strain ACICU) GN=atpA PE=3 SV=1	Cytoplasmic Protein	4	90.2
Acinetobacter	Proteobacteria	Acinetobacter baumannii	sp|P25705|ATPA_HUMAN ATP synthase subunit alpha, mitochondrial OS=Homo sapiens GN=ATP5A1 PE=1 SV=1	sp|A3M142|ATPA_ACIBT ATP synthase subunit alpha OS=Acinetobacter baumannii (strain ATCC 17978 / CIP 53.77 / LMG 1025 / NCDC KC755 / 5377) GN=atpA PE=3 SV=2	Cytoplasmic Protein	1	53.1
Acinetobacter	Proteobacteria	Acinetobacter baumannii	sp|P25705|ATPA_HUMAN ATP synthase subunit alpha, mitochondrial OS=Homo sapiens GN=ATP5A1 PE=1 SV=1	sp|B7H296|ATPA_ACIB3 ATP synthase subunit alpha OS=Acinetobacter baumannii (strain AB307-0294) GN=atpA PE=3 SV=1	Cytoplasmic Protein	4	90.2
Acinetobacter	Proteobacteria	Acinetobacter baylyi	sp|P06576|ATPB_HUMAN ATP synthase subunit beta, mitochondrial OS=Homo sapiens GN=ATP5B PE=1 SV=3	sp|Q6FFK0|ATPB_ACIAD ATP synthase subunit beta OS=Acinetobacter baylyi (strain ATCC 33305 / BD413 / ADP1) GN=atpD PE=3 SV=1	Cytoplasmic Protein	4	90.2
Acinetobacter	Proteobacteria	Acinetobacter baumannii	sp|P06576|ATPB_HUMAN ATP synthase subunit beta, mitochondrial OS=Homo sapiens GN=ATP5B PE=1 SV=3	sp|A3M144|ATPB_ACIBT ATP synthase subunit beta OS=Acinetobacter baumannii (strain ATCC 17978 / CIP 53.77 / LMG 1025 / NCDC KC755 / 5377) GN=atpD PE=3 SV=2	Cytoplasmic Protein	1	53.1
Acinetobacter	Proteobacteria	Acinetobacter baumannii	sp|P06576|ATPB_HUMAN ATP synthase subunit beta, mitochondrial OS=Homo sapiens GN=ATP5B PE=1 SV=3	sp|B0VNK4|ATPB_ACIBS ATP synthase subunit beta OS=Acinetobacter baumannii (strain SDF) GN=atpD PE=3 SV=1	Cytoplasmic Protein	4	90.2
Acinetobacter	Proteobacteria	Acinetobacter baumannii	sp|P06576|ATPB_HUMAN ATP synthase subunit beta, mitochondrial OS=Homo sapiens GN=ATP5B PE=1 SV=3	sp|B0VBP3|ATPB_ACIBY ATP synthase subunit beta OS=Acinetobacter baumannii (strain AYE) GN=atpD PE=3 SV=1	Cytoplasmic Protein	4	90.2
Acinetobacter	Proteobacteria	Acinetobacter baumannii	sp|P06576|ATPB_HUMAN ATP synthase subunit beta, mitochondrial OS=Homo sapiens GN=ATP5B PE=1 SV=3	sp|B7H294|ATPB_ACIB3 ATP synthase subunit beta OS=Acinetobacter baumannii (strain AB307-0294) GN=atpD PE=3 SV=1	Cytoplasmic Protein	4	90.2
Acinetobacter	Proteobacteria	Acinetobacter baumannii	sp|P06576|ATPB_HUMAN ATP synthase subunit beta, mitochondrial OS=Homo sapiens GN=ATP5B PE=1 SV=3	sp|B7I1W4|ATPB_ACIB5 ATP synthase subunit beta OS=Acinetobacter baumannii (strain AB0057) GN=atpD PE=3 SV=1	Cytoplasmic Protein	4	90.2
Acinetobacter	Proteobacteria	Acinetobacter baumannii	sp|P06576|ATPB_HUMAN ATP synthase subunit beta, mitochondrial OS=Homo sapiens GN=ATP5B PE=1 SV=3	sp|B2I102|ATPB_ACIBC ATP synthase subunit beta OS=Acinetobacter baumannii (strain ACICU) GN=atpD PE=3 SV=1	Cytoplasmic Protein	4	90.2
Acinetobacter	Proteobacteria	Acinetobacter sp.	sp|P16152|CBR1_HUMAN Carbonyl reductase [NADPH] 1 OS=Homo sapiens GN=CBR1 PE=1 SV=3	sp|P50203|PHAB_ACISR Acetoacetyl-CoA reductase OS=Acinetobacter sp. (strain RA3849) GN=phaB PE=3 SV=1	Cytoplasmic Protein	4	90.2
Acinetobacter	Proteobacteria	Acinetobacter baylyi	sp|P10809|CH60_HUMAN 60 kDa heat shock protein, mitochondrial OS=Homo sapiens GN=HSPD1 PE=1 SV=2	sp|Q6F8P6|CH60_ACIAD 60 kDa chaperonin OS=Acinetobacter baylyi (strain ATCC 33305 / BD413 / ADP1) GN=groL PE=3 SV=1	Cytoplasmic Protein	1	53.1
Acinetobacter	Proteobacteria	Acinetobacter baylyi	sp|O76031|CLPX_HUMAN ATP-dependent Clp protease ATP-binding subunit clpX-like, mitochondrial OS=Homo sapiens GN=CLPX PE=1 SV=2	sp|Q6FEP7|CLPX_ACIAD ATP-dependent Clp protease ATP-binding subunit ClpX OS=Acinetobacter baylyi (strain ATCC 33305 / BD413 / ADP1) GN=clpX PE=3 SV=1	Cytoplasmic Protein	1	53.1
Acinetobacter	Proteobacteria	Acinetobacter baumannii	sp|O76031|CLPX_HUMAN ATP-dependent Clp protease ATP-binding subunit clpX-like, mitochondrial OS=Homo sapiens GN=CLPX PE=1 SV=2	sp|B0V4T7|CLPX_ACIBY ATP-dependent Clp protease ATP-binding subunit ClpX OS=Acinetobacter baumannii (strain AYE) GN=clpX PE=3 SV=1	Cytoplasmic Protein	1	53.1
Acinetobacter	Proteobacteria	Acinetobacter baumannii	sp|O76031|CLPX_HUMAN ATP-dependent Clp protease ATP-binding subunit clpX-like, mitochondrial OS=Homo sapiens GN=CLPX PE=1 SV=2	sp|A3M1Y8|CLPX_ACIBT ATP-dependent Clp protease ATP-binding subunit ClpX OS=Acinetobacter baumannii (strain ATCC 17978 / CIP 53.77 / LMG 1025 / NCDC KC755 / 5377) GN=clpX PE=3 SV=2	Cytoplasmic Protein	1	53.1
Acinetobacter	Proteobacteria	Acinetobacter baumannii	sp|O76031|CLPX_HUMAN ATP-dependent Clp protease ATP-binding subunit clpX-like, mitochondrial OS=Homo sapiens GN=CLPX PE=1 SV=2	sp|B0VKU4|CLPX_ACIBS ATP-dependent Clp protease ATP-binding subunit ClpX OS=Acinetobacter baumannii (strain SDF) GN=clpX PE=3 SV=1	Cytoplasmic Protein	4	90.2
Acinetobacter	Proteobacteria	Acinetobacter baumannii	sp|O76031|CLPX_HUMAN ATP-dependent Clp protease ATP-binding subunit clpX-like, mitochondrial OS=Homo sapiens GN=CLPX PE=1 SV=2	sp|B2I3C2|CLPX_ACIBC ATP-dependent Clp protease ATP-binding subunit ClpX OS=Acinetobacter baumannii (strain ACICU) GN=clpX PE=3 SV=1	Cytoplasmic Protein	4	90.2
Acinetobacter	Proteobacteria	Acinetobacter baumannii	sp|O76031|CLPX_HUMAN ATP-dependent Clp protease ATP-binding subunit clpX-like, mitochondrial OS=Homo sapiens GN=CLPX PE=1 SV=2	sp|B7I5E4|CLPX_ACIB5 ATP-dependent Clp protease ATP-binding subunit ClpX OS=Acinetobacter baumannii (strain AB0057) GN=clpX PE=3 SV=1	Cytoplasmic Protein	4	90.2
Acinetobacter	Proteobacteria	Acinetobacter baumannii	sp|O76031|CLPX_HUMAN ATP-dependent Clp protease ATP-binding subunit clpX-like, mitochondrial OS=Homo sapiens GN=CLPX PE=1 SV=2	sp|B7H092|CLPX_ACIB3 ATP-dependent Clp protease ATP-binding subunit ClpX OS=Acinetobacter baumannii (strain AB307-0294) GN=clpX PE=3 SV=1	Cytoplasmic Protein	1	53.1
Acinetobacter	Proteobacteria	Acinetobacter baumannii	sp|Q8NE62|CHDH_HUMAN Choline dehydrogenase, mitochondrial OS=Homo sapiens GN=CHDH PE=1 SV=2	sp|B7I895|BETA_ACIB5 Oxygen-dependent choline dehydrogenase OS=Acinetobacter baumannii (strain AB0057) GN=betA PE=3 SV=1	Cytoplasmic Protein	4	90.2
Acinetobacter	Proteobacteria	Acinetobacter baumannii	sp|Q8NE62|CHDH_HUMAN Choline dehydrogenase, mitochondrial OS=Homo sapiens GN=CHDH PE=1 SV=2	sp|B7GYG5|BETA_ACIB3 Oxygen-dependent choline dehydrogenase OS=Acinetobacter baumannii (strain AB307-0294) GN=betA PE=3 SV=1	Cytoplasmic Protein	4	90.2
Acinetobacter	Proteobacteria	Acinetobacter baumannii	sp|Q8NE62|CHDH_HUMAN Choline dehydrogenase, mitochondrial OS=Homo sapiens GN=CHDH PE=1 SV=2	sp|B0V945|BETA_ACIBY Oxygen-dependent choline dehydrogenase OS=Acinetobacter baumannii (strain AYE) GN=betA PE=3 SV=1	Cytoplasmic Protein	1	53.1
Acinetobacter	Proteobacteria	Acinetobacter baumannii	sp|Q8NE62|CHDH_HUMAN Choline dehydrogenase, mitochondrial OS=Homo sapiens GN=CHDH PE=1 SV=2	sp|B0VST3|BETA_ACIBS Oxygen-dependent choline dehydrogenase OS=Acinetobacter baumannii (strain SDF) GN=betA PE=3 SV=1	Cytoplasmic Protein	1	53.1
Acinetobacter	Proteobacteria	Acinetobacter baumannii	sp|Q8NE62|CHDH_HUMAN Choline dehydrogenase, mitochondrial OS=Homo sapiens GN=CHDH PE=1 SV=2	sp|B2HV79|BETA_ACIBC Oxygen-dependent choline dehydrogenase OS=Acinetobacter baumannii (strain ACICU) GN=betA PE=3 SV=1	Cytoplasmic Protein	1	53.1
Acinetobacter	Proteobacteria	Acinetobacter baylyi	sp|Q8NE62|CHDH_HUMAN Choline dehydrogenase, mitochondrial OS=Homo sapiens GN=CHDH PE=1 SV=2	sp|Q6FDF9|BETA_ACIAD Oxygen-dependent choline dehydrogenase OS=Acinetobacter baylyi (strain ATCC 33305 / BD413 / ADP1) GN=betA PE=3 SV=1	Cytoplasmic Protein	4	90.2
Acinetobacter	Proteobacteria	Acinetobacter baumannii	sp|Q96KP4|CNDP2_HUMAN Cytosolic non-specific dipeptidase OS=Homo sapiens GN=CNDP2 PE=1 SV=2	sp|B0VRY3|DAPE_ACIBS Succinyl-diaminopimelate desuccinylase OS=Acinetobacter baumannii (strain SDF) GN=dapE PE=3 SV=1	Cytoplasmic Protein	1	53.1
Acinetobacter	Proteobacteria	Acinetobacter baumannii	sp|Q96KP4|CNDP2_HUMAN Cytosolic non-specific dipeptidase OS=Homo sapiens GN=CNDP2 PE=1 SV=2	sp|B7GXA3|DAPE_ACIB3 Succinyl-diaminopimelate desuccinylase OS=Acinetobacter baumannii (strain AB307-0294) GN=dapE PE=3 SV=1	Cytoplasmic Protein	1	53.1
Acinetobacter	Proteobacteria	Acinetobacter baumannii	sp|Q96KP4|CNDP2_HUMAN Cytosolic non-specific dipeptidase OS=Homo sapiens GN=CNDP2 PE=1 SV=2	sp|B0V4V8|DAPE_ACIBY Succinyl-diaminopimelate desuccinylase OS=Acinetobacter baumannii (strain AYE) GN=dapE PE=3 SV=1	Cytoplasmic Protein	4	90.2
Acinetobacter	Proteobacteria	Acinetobacter baumannii	sp|Q96KP4|CNDP2_HUMAN Cytosolic non-specific dipeptidase OS=Homo sapiens GN=CNDP2 PE=1 SV=2	sp|B7I842|DAPE_ACIB5 Succinyl-diaminopimelate desuccinylase OS=Acinetobacter baumannii (strain AB0057) GN=dapE PE=3 SV=1	Cytoplasmic Protein	4	90.2
Acinetobacter	Proteobacteria	Acinetobacter baumannii	sp|Q96KP4|CNDP2_HUMAN Cytosolic non-specific dipeptidase OS=Homo sapiens GN=CNDP2 PE=1 SV=2	sp|A3M8H2|DAPE_ACIBT Succinyl-diaminopimelate desuccinylase OS=Acinetobacter baumannii (strain ATCC 17978 / CIP 53.77 / LMG 1025 / NCDC KC755 / 5377) GN=dapE PE=3 SV=2	Cytoplasmic Protein	4	90.2
Acinetobacter	Proteobacteria	Acinetobacter baumannii	sp|Q96KP4|CNDP2_HUMAN Cytosolic non-specific dipeptidase OS=Homo sapiens GN=CNDP2 PE=1 SV=2	sp|B2HY23|DAPE_ACIBC Succinyl-diaminopimelate desuccinylase OS=Acinetobacter baumannii (strain ACICU) GN=dapE PE=3 SV=1	Cytoplasmic Protein	1	53.1
Acinetobacter	Proteobacteria	Acinetobacter baumannii	sp|Q8WVB6|CTF18_HUMAN Chromosome transmission fidelity protein 18 homolog OS=Homo sapiens GN=CHTF18 PE=1 SV=1	sp|A3M7W1|RUVB_ACIBT Holliday junction ATP-dependent DNA helicase RuvB OS=Acinetobacter baumannii (strain ATCC 17978 / CIP 53.77 / LMG 1025 / NCDC KC755 / 5377) GN=ruvB PE=3 SV=2	Cytoplasmic Protein	4	90.2
Acinetobacter	Proteobacteria	Acinetobacter baumannii	sp|Q8WVB6|CTF18_HUMAN Chromosome transmission fidelity protein 18 homolog OS=Homo sapiens GN=CHTF18 PE=1 SV=1	sp|B2HWT3|RUVB_ACIBC Holliday junction ATP-dependent DNA helicase RuvB OS=Acinetobacter baumannii (strain ACICU) GN=ruvB PE=3 SV=1	Cytoplasmic Protein	4	90.2
Acinetobacter	Proteobacteria	Acinetobacter baumannii	sp|Q8WVB6|CTF18_HUMAN Chromosome transmission fidelity protein 18 homolog OS=Homo sapiens GN=CHTF18 PE=1 SV=1	sp|B0VDI5|RUVB_ACIBY Holliday junction ATP-dependent DNA helicase RuvB OS=Acinetobacter baumannii (strain AYE) GN=ruvB PE=3 SV=1	Cytoplasmic Protein	4	90.2
Acinetobacter	Proteobacteria	Acinetobacter baumannii	sp|Q8WVB6|CTF18_HUMAN Chromosome transmission fidelity protein 18 homolog OS=Homo sapiens GN=CHTF18 PE=1 SV=1	sp|B7GYB5|RUVB_ACIB3 Holliday junction ATP-dependent DNA helicase RuvB OS=Acinetobacter baumannii (strain AB307-0294) GN=ruvB PE=3 SV=1	Cytoplasmic Protein	4	90.2
Acinetobacter	Proteobacteria	Acinetobacter baumannii	sp|Q8WVB6|CTF18_HUMAN Chromosome transmission fidelity protein 18 homolog OS=Homo sapiens GN=CHTF18 PE=1 SV=1	sp|B0VT89|RUVB_ACIBS Holliday junction ATP-dependent DNA helicase RuvB OS=Acinetobacter baumannii (strain SDF) GN=ruvB PE=3 SV=1	Cytoplasmic Protein	4	90.2
Acinetobacter	Proteobacteria	Acinetobacter baumannii	sp|Q8WVB6|CTF18_HUMAN Chromosome transmission fidelity protein 18 homolog OS=Homo sapiens GN=CHTF18 PE=1 SV=1	sp|B7I5A9|RUVB_ACIB5 Holliday junction ATP-dependent DNA helicase RuvB OS=Acinetobacter baumannii (strain AB0057) GN=ruvB PE=3 SV=1	Cytoplasmic Protein	1	53.1
Acinetobacter	Proteobacteria	Acinetobacter baylyi	sp|Q8WVB6|CTF18_HUMAN Chromosome transmission fidelity protein 18 homolog OS=Homo sapiens GN=CHTF18 PE=1 SV=1	sp|Q6F991|RUVB_ACIAD Holliday junction ATP-dependent DNA helicase RuvB OS=Acinetobacter baylyi (strain ATCC 33305 / BD413 / ADP1) GN=ruvB PE=3 SV=1	Cytoplasmic Protein	5	98.1
Acinetobacter	Proteobacteria	Acinetobacter baylyi	sp|P06132|DCUP_HUMAN Uroporphyrinogen decarboxylase OS=Homo sapiens GN=UROD PE=1 SV=2	sp|Q6F9M1|DCUP_ACIAD Uroporphyrinogen decarboxylase OS=Acinetobacter baylyi (strain ATCC 33305 / BD413 / ADP1) GN=hemE PE=3 SV=1	Cytoplasmic Protein	1	53.1
Acinetobacter	Proteobacteria	Acinetobacter baumannii	sp|P06132|DCUP_HUMAN Uroporphyrinogen decarboxylase OS=Homo sapiens GN=UROD PE=1 SV=2	sp|A3M795|DCUP_ACIBT Uroporphyrinogen decarboxylase OS=Acinetobacter baumannii (strain ATCC 17978 / CIP 53.77 / LMG 1025 / NCDC KC755 / 5377) GN=hemE PE=3 SV=2	Cytoplasmic Protein	1	53.1
Acinetobacter	Proteobacteria	Acinetobacter baumannii	sp|P06132|DCUP_HUMAN Uroporphyrinogen decarboxylase OS=Homo sapiens GN=UROD PE=1 SV=2	sp|B0VBT2|DCUP_ACIBY Uroporphyrinogen decarboxylase OS=Acinetobacter baumannii (strain AYE) GN=hemE PE=3 SV=1	Cytoplasmic Protein	4	90.2
Acinetobacter	Proteobacteria	Acinetobacter baumannii	sp|P06132|DCUP_HUMAN Uroporphyrinogen decarboxylase OS=Homo sapiens GN=UROD PE=1 SV=2	sp|B7GZK6|DCUP_ACIB3 Uroporphyrinogen decarboxylase OS=Acinetobacter baumannii (strain AB307-0294) GN=hemE PE=3 SV=1	Cytoplasmic Protein	4	90.2
Acinetobacter	Proteobacteria	Acinetobacter baumannii	sp|P06132|DCUP_HUMAN Uroporphyrinogen decarboxylase OS=Homo sapiens GN=UROD PE=1 SV=2	sp|B7I451|DCUP_ACIB5 Uroporphyrinogen decarboxylase OS=Acinetobacter baumannii (strain AB0057) GN=hemE PE=3 SV=1	Cytoplasmic Protein	4	90.2
Acinetobacter	Proteobacteria	Acinetobacter baumannii	sp|P06132|DCUP_HUMAN Uroporphyrinogen decarboxylase OS=Homo sapiens GN=UROD PE=1 SV=2	sp|B2HVF8|DCUP_ACIBC Uroporphyrinogen decarboxylase OS=Acinetobacter baumannii (strain ACICU) GN=hemE PE=3 SV=1	Cytoplasmic Protein	4	90.2
Acinetobacter	Proteobacteria	Acinetobacter baumannii	sp|P06132|DCUP_HUMAN Uroporphyrinogen decarboxylase OS=Homo sapiens GN=UROD PE=1 SV=2	sp|B0VUQ9|DCUP_ACIBS Uroporphyrinogen decarboxylase OS=Acinetobacter baumannii (strain SDF) GN=hemE PE=3 SV=1	Cytoplasmic Protein	1	53.1
Acinetobacter	Proteobacteria	Acinetobacter baylyi	sp|P56937|DHB7_HUMAN 3-keto-steroid reductase OS=Homo sapiens GN=HSD17B7 PE=1 SV=1	sp|Q6F7B8|ACR1_ACIAD Fatty acyl-CoA reductase OS=Acinetobacter baylyi (strain ATCC 33305 / BD413 / ADP1) GN=acr1 PE=1 SV=2	Cytoplasmic Protein	4	90.2
Acinetobacter	Proteobacteria	Acinetobacter baumannii	sp|O75953|DNJB5_HUMAN DnaJ homolog subfamily B member 5 OS=Homo sapiens GN=DNAJB5 PE=1 SV=1	sp|B0VA24|DNAJ_ACIBY Chaperone protein DnaJ OS=Acinetobacter baumannii (strain AYE) GN=dnaJ PE=3 SV=1	Cytoplasmic Protein	2	68.1
Acinetobacter	Proteobacteria	Acinetobacter baumannii	sp|O75953|DNJB5_HUMAN DnaJ homolog subfamily B member 5 OS=Homo sapiens GN=DNAJB5 PE=1 SV=1	sp|A3MA88|DNAJ_ACIBT Chaperone protein DnaJ OS=Acinetobacter baumannii (strain ATCC 17978 / CIP 53.77 / LMG 1025 / NCDC KC755 / 5377) GN=dnaJ PE=3 SV=2	Cytoplasmic Protein	4	90.2
Acinetobacter	Proteobacteria	Acinetobacter baumannii	sp|O75953|DNJB5_HUMAN DnaJ homolog subfamily B member 5 OS=Homo sapiens GN=DNAJB5 PE=1 SV=1	sp|B0VQ00|DNAJ_ACIBS Chaperone protein DnaJ OS=Acinetobacter baumannii (strain SDF) GN=dnaJ PE=3 SV=1	Cytoplasmic Protein	1	53.1
Acinetobacter	Proteobacteria	Acinetobacter baumannii	sp|O75953|DNJB5_HUMAN DnaJ homolog subfamily B member 5 OS=Homo sapiens GN=DNAJB5 PE=1 SV=1	sp|B2I2G6|DNAJ_ACIBC Chaperone protein DnaJ OS=Acinetobacter baumannii (strain ACICU) GN=dnaJ PE=3 SV=1	Cytoplasmic Protein	4	90.2
Acinetobacter	Proteobacteria	Acinetobacter baumannii	sp|O75953|DNJB5_HUMAN DnaJ homolog subfamily B member 5 OS=Homo sapiens GN=DNAJB5 PE=1 SV=1	sp|B7I2B2|DNAJ_ACIB5 Chaperone protein DnaJ OS=Acinetobacter baumannii (strain AB0057) GN=dnaJ PE=3 SV=1	Cytoplasmic Protein	1	53.1
Acinetobacter	Proteobacteria	Acinetobacter baumannii	sp|O75953|DNJB5_HUMAN DnaJ homolog subfamily B member 5 OS=Homo sapiens GN=DNAJB5 PE=1 SV=1	sp|B7GV08|DNAJ_ACIB3 Chaperone protein DnaJ OS=Acinetobacter baumannii (strain AB307-0294) GN=dnaJ PE=3 SV=1	Cytoplasmic Protein	4	90.2
Acinetobacter	Proteobacteria	Acinetobacter baylyi	sp|O75953|DNJB5_HUMAN DnaJ homolog subfamily B member 5 OS=Homo sapiens GN=DNAJB5 PE=1 SV=1	sp|Q6F6R1|DNAJ_ACIAD Chaperone protein DnaJ OS=Acinetobacter baylyi (strain ATCC 33305 / BD413 / ADP1) GN=dnaJ PE=3 SV=1	Cytoplasmic Protein	4	90.2
Acinetobacter	Proteobacteria	Acinetobacter baylyi	sp|P06733|ENOA_HUMAN Alpha-enolase OS=Homo sapiens GN=ENO1 PE=1 SV=2	sp|Q6FAT9|ENO_ACIAD Enolase OS=Acinetobacter baylyi (strain ATCC 33305 / BD413 / ADP1) GN=eno PE=3 SV=1	Cytoplasmic Protein	4	90.2
Acinetobacter	Proteobacteria	Acinetobacter baumannii	sp|P06733|ENOA_HUMAN Alpha-enolase OS=Homo sapiens GN=ENO1 PE=1 SV=2	sp|B0V677|ENO_ACIBY Enolase OS=Acinetobacter baumannii (strain AYE) GN=eno PE=3 SV=1	Cytoplasmic Protein	4	90.2
Acinetobacter	Proteobacteria	Acinetobacter baumannii	sp|P06733|ENOA_HUMAN Alpha-enolase OS=Homo sapiens GN=ENO1 PE=1 SV=2	sp|B2I2A5|ENO_ACIBC Enolase OS=Acinetobacter baumannii (strain ACICU) GN=eno PE=3 SV=1	Cytoplasmic Protein	4	90.2
Acinetobacter	Proteobacteria	Acinetobacter baumannii	sp|P06733|ENOA_HUMAN Alpha-enolase OS=Homo sapiens GN=ENO1 PE=1 SV=2	sp|B7I918|ENO_ACIB5 Enolase OS=Acinetobacter baumannii (strain AB0057) GN=eno PE=3 SV=1	Cytoplasmic Protein	1	53.1
Acinetobacter	Proteobacteria	Acinetobacter baumannii	sp|P06733|ENOA_HUMAN Alpha-enolase OS=Homo sapiens GN=ENO1 PE=1 SV=2	sp|A3M5Y1|ENO_ACIBT Enolase OS=Acinetobacter baumannii (strain ATCC 17978 / CIP 53.77 / LMG 1025 / NCDC KC755 / 5377) GN=eno PE=3 SV=2	Cytoplasmic Protein	3	71.1
Acinetobacter	Proteobacteria	Acinetobacter baumannii	sp|P06733|ENOA_HUMAN Alpha-enolase OS=Homo sapiens GN=ENO1 PE=1 SV=2	sp|B7H227|ENO_ACIB3 Enolase OS=Acinetobacter baumannii (strain AB307-0294) GN=eno PE=3 SV=1	Cytoplasmic Protein	1	53.1
Acinetobacter	Proteobacteria	Acinetobacter baumannii	sp|P06733|ENOA_HUMAN Alpha-enolase OS=Homo sapiens GN=ENO1 PE=1 SV=2	sp|B0VQI4|ENO_ACIBS Enolase OS=Acinetobacter baumannii (strain SDF) GN=eno PE=3 SV=1	Cytoplasmic Protein	3	71.1
Acinetobacter	Proteobacteria	Acinetobacter baylyi	sp|P14625|ENPL_HUMAN Endoplasmin OS=Homo sapiens GN=HSP90B1 PE=1 SV=1	sp|Q6FF82|HTPG_ACIAD Chaperone protein HtpG OS=Acinetobacter baylyi (strain ATCC 33305 / BD413 / ADP1) GN=htpG PE=3 SV=1	Cytoplasmic Protein	2	68.1
Acinetobacter	Proteobacteria	Acinetobacter baumannii	sp|Q96RP9|EFGM_HUMAN Elongation factor G, mitochondrial OS=Homo sapiens GN=GFM1 PE=1 SV=2	sp|B0VTG3|EFG_ACIBS Elongation factor G OS=Acinetobacter baumannii (strain SDF) GN=fusA PE=3 SV=1	Cytoplasmic Protein	4	90.2
Acinetobacter	Proteobacteria	Acinetobacter baumannii	sp|Q96RP9|EFGM_HUMAN Elongation factor G, mitochondrial OS=Homo sapiens GN=GFM1 PE=1 SV=2	sp|B0V8Y3|EFG_ACIBY Elongation factor G OS=Acinetobacter baumannii (strain AYE) GN=fusA PE=3 SV=1	Cytoplasmic Protein	4	90.2
Acinetobacter	Proteobacteria	Acinetobacter baumannii	sp|Q96RP9|EFGM_HUMAN Elongation factor G, mitochondrial OS=Homo sapiens GN=GFM1 PE=1 SV=2	sp|A3M306|EFG_ACIBT Elongation factor G OS=Acinetobacter baumannii (strain ATCC 17978 / CIP 53.77 / LMG 1025 / NCDC KC755 / 5377) GN=fusA PE=3 SV=2	Cytoplasmic Protein	1	53.1
Acinetobacter	Proteobacteria	Acinetobacter baumannii	sp|Q96RP9|EFGM_HUMAN Elongation factor G, mitochondrial OS=Homo sapiens GN=GFM1 PE=1 SV=2	sp|B2HUQ4|EFG_ACIBC Elongation factor G OS=Acinetobacter baumannii (strain ACICU) GN=fusA PE=3 SV=1	Cytoplasmic Protein	1	53.1
Acinetobacter	Proteobacteria	Acinetobacter baumannii	sp|Q96RP9|EFGM_HUMAN Elongation factor G, mitochondrial OS=Homo sapiens GN=GFM1 PE=1 SV=2	sp|B7I7S1|EFG_ACIB5 Elongation factor G OS=Acinetobacter baumannii (strain AB0057) GN=fusA PE=3 SV=1	Cytoplasmic Protein	4	90.2
Acinetobacter	Proteobacteria	Acinetobacter baumannii	sp|Q96RP9|EFGM_HUMAN Elongation factor G, mitochondrial OS=Homo sapiens GN=GFM1 PE=1 SV=2	sp|B7GYM8|EFG_ACIB3 Elongation factor G OS=Acinetobacter baumannii (strain AB307-0294) GN=fusA PE=3 SV=1	Cytoplasmic Protein	4	90.2
Acinetobacter	Proteobacteria	Acinetobacter baylyi	sp|Q96RP9|EFGM_HUMAN Elongation factor G, mitochondrial OS=Homo sapiens GN=GFM1 PE=1 SV=2	sp|Q6FDS6|EFG_ACIAD Elongation factor G OS=Acinetobacter baylyi (strain ATCC 33305 / BD413 / ADP1) GN=fusA PE=3 SV=1	Cytoplasmic Protein	4	90.2
Acinetobacter	Proteobacteria	Acinetobacter baylyi	sp|P49411|EFTU_HUMAN Elongation factor Tu, mitochondrial OS=Homo sapiens GN=TUFM PE=1 SV=2	sp|Q6FF97|EFTU_ACIAD Elongation factor Tu OS=Acinetobacter baylyi (strain ATCC 33305 / BD413 / ADP1) GN=tuf1 PE=3 SV=1	Cytoplasmic Protein	4	90.2
Acinetobacter	Proteobacteria	Acinetobacter baumannii	sp|P49411|EFTU_HUMAN Elongation factor Tu, mitochondrial OS=Homo sapiens GN=TUFM PE=1 SV=2	sp|A3M1F6|EFTU_ACIBT Elongation factor Tu OS=Acinetobacter baumannii (strain ATCC 17978 / CIP 53.77 / LMG 1025 / NCDC KC755 / 5377) GN=tuf1 PE=3 SV=2	Cytoplasmic Protein	4	90.2
Acinetobacter	Proteobacteria	Acinetobacter baumannii	sp|P49411|EFTU_HUMAN Elongation factor Tu, mitochondrial OS=Homo sapiens GN=TUFM PE=1 SV=2	sp|B7H1K5|EFTU_ACIB3 Elongation factor Tu OS=Acinetobacter baumannii (strain AB307-0294) GN=tuf PE=3 SV=1	Cytoplasmic Protein	4	90.2
Acinetobacter	Proteobacteria	Acinetobacter baumannii	sp|P09467|F16P1_HUMAN Fructose-1,6-bisphosphatase 1 OS=Homo sapiens GN=FBP1 PE=1 SV=5	sp|A3M7W9|F16PA_ACIBT Fructose-1,6-bisphosphatase class 1 OS=Acinetobacter baumannii (strain ATCC 17978 / CIP 53.77 / LMG 1025 / NCDC KC755 / 5377) GN=fbp PE=3 SV=2	Cytoplasmic Protein	1	53.1
Acinetobacter	Proteobacteria	Acinetobacter baumannii	sp|P09467|F16P1_HUMAN Fructose-1,6-bisphosphatase 1 OS=Homo sapiens GN=FBP1 PE=1 SV=5	sp|B0VDK0|F16PA_ACIBY Fructose-1,6-bisphosphatase class 1 OS=Acinetobacter baumannii (strain AYE) GN=fbp PE=3 SV=1	Cytoplasmic Protein	4	90.2
Acinetobacter	Proteobacteria	Acinetobacter baumannii	sp|P09467|F16P1_HUMAN Fructose-1,6-bisphosphatase 1 OS=Homo sapiens GN=FBP1 PE=1 SV=5	sp|B0VT80|F16PA_ACIBS Fructose-1,6-bisphosphatase class 1 OS=Acinetobacter baumannii (strain SDF) GN=fbp PE=3 SV=1	Cytoplasmic Protein	1	53.1
Acinetobacter	Proteobacteria	Acinetobacter baumannii	sp|P09467|F16P1_HUMAN Fructose-1,6-bisphosphatase 1 OS=Homo sapiens GN=FBP1 PE=1 SV=5	sp|B2HWU2|F16PA_ACIBC Fructose-1,6-bisphosphatase class 1 OS=Acinetobacter baumannii (strain ACICU) GN=fbp PE=3 SV=1	Cytoplasmic Protein	1	53.1
Acinetobacter	Proteobacteria	Acinetobacter baylyi	sp|P09467|F16P1_HUMAN Fructose-1,6-bisphosphatase 1 OS=Homo sapiens GN=FBP1 PE=1 SV=5	sp|Q6F982|F16PA_ACIAD Fructose-1,6-bisphosphatase class 1 OS=Acinetobacter baylyi (strain ATCC 33305 / BD413 / ADP1) GN=fbp PE=3 SV=1	Cytoplasmic Protein	1	53.1
Acinetobacter	Proteobacteria	Acinetobacter baylyi	sp|Q16134|ETFD_HUMAN Electron transfer flavoprotein-ubiquinone oxidoreductase, mitochondrial OS=Homo sapiens GN=ETFDH PE=1 SV=2	sp|P94132|ETFD_ACIAD Probable electron transfer flavoprotein-ubiquinone oxidoreductase OS=Acinetobacter baylyi (strain ATCC 33305 / BD413 / ADP1) GN=etfD PE=3 SV=1	Cytoplasmic Protein	4	90.2
Acinetobacter	Proteobacteria	Acinetobacter calcoaceticus	sp|Q96C23|GALM_HUMAN Aldose 1-epimerase OS=Homo sapiens GN=GALM PE=1 SV=1	sp|P05149|GALM_ACICA Aldose 1-epimerase OS=Acinetobacter calcoaceticus GN=mro PE=1 SV=1	Cytoplasmic Protein	4	90.2
Acinetobacter	Proteobacteria	Acinetobacter baumannii	sp|P06744|G6PI_HUMAN Glucose-6-phosphate isomerase OS=Homo sapiens GN=GPI PE=1 SV=4	sp|A3M0W5|G6PI_ACIBT Glucose-6-phosphate isomerase OS=Acinetobacter baumannii (strain ATCC 17978 / CIP 53.77 / LMG 1025 / NCDC KC755 / 5377) GN=pgi PE=3 SV=2	Cytoplasmic Protein	4	90.2
Acinetobacter	Proteobacteria	Acinetobacter baumannii	sp|P06744|G6PI_HUMAN Glucose-6-phosphate isomerase OS=Homo sapiens GN=GPI PE=1 SV=4	sp|B2I056|G6PI_ACIBC Glucose-6-phosphate isomerase OS=Acinetobacter baumannii (strain ACICU) GN=pgi PE=3 SV=1	Cytoplasmic Protein	3	71.1
Acinetobacter	Proteobacteria	Acinetobacter baumannii	sp|P06744|G6PI_HUMAN Glucose-6-phosphate isomerase OS=Homo sapiens GN=GPI PE=1 SV=4	sp|B0VMS2|G6PI_ACIBS Glucose-6-phosphate isomerase OS=Acinetobacter baumannii (strain SDF) GN=pgi PE=3 SV=1	Cytoplasmic Protein	4	90.2
Acinetobacter	Proteobacteria	Acinetobacter lwoffii	sp|P06744|G6PI_HUMAN Glucose-6-phosphate isomerase OS=Homo sapiens GN=GPI PE=1 SV=4	sp|Q9RMC1|G6PI_ACILW Glucose-6-phosphate isomerase OS=Acinetobacter lwoffii GN=pgi PE=3 SV=1	Cytoplasmic Protein	1	53.1
Acinetobacter	Proteobacteria	Acinetobacter baumannii	sp|P06744|G6PI_HUMAN Glucose-6-phosphate isomerase OS=Homo sapiens GN=GPI PE=1 SV=4	sp|B7H2H4|G6PI_ACIB3 Glucose-6-phosphate isomerase OS=Acinetobacter baumannii (strain AB307-0294) GN=pgi PE=3 SV=1	Cytoplasmic Protein	4	90.2
Acinetobacter	Proteobacteria	Acinetobacter baumannii	sp|P06744|G6PI_HUMAN Glucose-6-phosphate isomerase OS=Homo sapiens GN=GPI PE=1 SV=4	sp|B0V6J2|G6PI_ACIBY Glucose-6-phosphate isomerase OS=Acinetobacter baumannii (strain AYE) GN=pgi PE=3 SV=1	Cytoplasmic Protein	3	71.1
Acinetobacter	Proteobacteria	Acinetobacter baumannii	sp|P06744|G6PI_HUMAN Glucose-6-phosphate isomerase OS=Homo sapiens GN=GPI PE=1 SV=4	sp|B7IBR9|G6PI_ACIB5 Glucose-6-phosphate isomerase OS=Acinetobacter baumannii (strain AB0057) GN=pgi PE=3 SV=1	Cytoplasmic Protein	4	90.2
Acinetobacter	Proteobacteria	Acinetobacter baylyi	sp|P06744|G6PI_HUMAN Glucose-6-phosphate isomerase OS=Homo sapiens GN=GPI PE=1 SV=4	sp|Q59088|G6PI_ACIAD Glucose-6-phosphate isomerase OS=Acinetobacter baylyi (strain ATCC 33305 / BD413 / ADP1) GN=pgi PE=3 SV=1	Cytoplasmic Protein	4	90.2
Acinetobacter	Proteobacteria	Acinetobacter baylyi	sp|Q9H0R6|GATA_HUMAN Glutamyl-tRNA(Gln) amidotransferase subunit A, mitochondrial OS=Homo sapiens GN=QRSL1 PE=1 SV=2	sp|Q6FDY3|GATA_ACIAD Glutamyl-tRNA(Gln) amidotransferase subunit A OS=Acinetobacter baylyi (strain ATCC 33305 / BD413 / ADP1) GN=gatA PE=3 SV=1	Cytoplasmic Protein	4	90.2
Acinetobacter	Proteobacteria	Acinetobacter baumannii	sp|Q9H0R6|GATA_HUMAN Glutamyl-tRNA(Gln) amidotransferase subunit A, mitochondrial OS=Homo sapiens GN=QRSL1 PE=1 SV=2	sp|B0VS13|GATA_ACIBS Glutamyl-tRNA(Gln) amidotransferase subunit A OS=Acinetobacter baumannii (strain SDF) GN=gatA PE=3 SV=1	Cytoplasmic Protein	4	90.2
Acinetobacter	Proteobacteria	Acinetobacter baumannii	sp|Q9H0R6|GATA_HUMAN Glutamyl-tRNA(Gln) amidotransferase subunit A, mitochondrial OS=Homo sapiens GN=QRSL1 PE=1 SV=2	sp|A3M8F1|GATA_ACIBT Glutamyl-tRNA(Gln) amidotransferase subunit A OS=Acinetobacter baumannii (strain ATCC 17978 / CIP 53.77 / LMG 1025 / NCDC KC755 / 5377) GN=gatA PE=3 SV=2	Cytoplasmic Protein	4	90.2
Acinetobacter	Proteobacteria	Acinetobacter baumannii	sp|Q9H0R6|GATA_HUMAN Glutamyl-tRNA(Gln) amidotransferase subunit A, mitochondrial OS=Homo sapiens GN=QRSL1 PE=1 SV=2	sp|B0VEN3|GATA_ACIBY Glutamyl-tRNA(Gln) amidotransferase subunit A OS=Acinetobacter baumannii (strain AYE) GN=gatA PE=3 SV=1	Cytoplasmic Protein	4	90.2
Acinetobacter	Proteobacteria	Acinetobacter baumannii	sp|Q9H0R6|GATA_HUMAN Glutamyl-tRNA(Gln) amidotransferase subunit A, mitochondrial OS=Homo sapiens GN=QRSL1 PE=1 SV=2	sp|B7GXC5|GATA_ACIB3 Glutamyl-tRNA(Gln) amidotransferase subunit A OS=Acinetobacter baumannii (strain AB307-0294) GN=gatA PE=3 SV=1	Cytoplasmic Protein	4	90.2
Acinetobacter	Proteobacteria	Acinetobacter baumannii	sp|Q9H0R6|GATA_HUMAN Glutamyl-tRNA(Gln) amidotransferase subunit A, mitochondrial OS=Homo sapiens GN=QRSL1 PE=1 SV=2	sp|B2HY00|GATA_ACIBC Glutamyl-tRNA(Gln) amidotransferase subunit A OS=Acinetobacter baumannii (strain ACICU) GN=gatA PE=3 SV=1	Cytoplasmic Protein	4	90.2
Acinetobacter	Proteobacteria	Acinetobacter baumannii	sp|Q9H0R6|GATA_HUMAN Glutamyl-tRNA(Gln) amidotransferase subunit A, mitochondrial OS=Homo sapiens GN=QRSL1 PE=1 SV=2	sp|B7I7N2|GATA_ACIB5 Glutamyl-tRNA(Gln) amidotransferase subunit A OS=Acinetobacter baumannii (strain AB0057) GN=gatA PE=3 SV=1	Cytoplasmic Protein	4	90.2
Acinetobacter	Proteobacteria	Acinetobacter baylyi	sp|Q06210|GFPT1_HUMAN Glutamine--fructose-6-phosphate aminotransferase [isomerizing] 1 OS=Homo sapiens GN=GFPT1 PE=1 SV=3	sp|Q6F6U8|GLMS_ACIAD Glutamine--fructose-6-phosphate aminotransferase [isomerizing] OS=Acinetobacter baylyi (strain ATCC 33305 / BD413 / ADP1) GN=glmS PE=3 SV=3	Cytoplasmic Protein	1	53.1
Acinetobacter	Proteobacteria	Acinetobacter baylyi	sp|Q14409|GLPK3_HUMAN Putative glycerol kinase 3 OS=Homo sapiens GN=GK3P PE=5 SV=2	sp|Q6FDN3|GLPK_ACIAD Glycerol kinase OS=Acinetobacter baylyi (strain ATCC 33305 / BD413 / ADP1) GN=glpK PE=3 SV=1	Cytoplasmic Protein	1	53.1
Acinetobacter	Proteobacteria	Acinetobacter radioresistens	sp|P34897|GLYM_HUMAN Serine hydroxymethyltransferase, mitochondrial OS=Homo sapiens GN=SHMT2 PE=1 SV=3	sp|O85718|GLYA_ACIRA Serine hydroxymethyltransferase OS=Acinetobacter radioresistens GN=glyA PE=3 SV=1	Cytoplasmic Protein	4	90.2
Acinetobacter	Proteobacteria	Acinetobacter baylyi	sp|P34897|GLYM_HUMAN Serine hydroxymethyltransferase, mitochondrial OS=Homo sapiens GN=SHMT2 PE=1 SV=3	sp|Q6FA66|GLYA_ACIAD Serine hydroxymethyltransferase OS=Acinetobacter baylyi (strain ATCC 33305 / BD413 / ADP1) GN=glyA PE=3 SV=1	Cytoplasmic Protein	4	90.2
Acinetobacter	Proteobacteria	Acinetobacter baumannii	sp|P34897|GLYM_HUMAN Serine hydroxymethyltransferase, mitochondrial OS=Homo sapiens GN=SHMT2 PE=1 SV=3	sp|A3M736|GLYA_ACIBT Serine hydroxymethyltransferase OS=Acinetobacter baumannii (strain ATCC 17978 / CIP 53.77 / LMG 1025 / NCDC KC755 / 5377) GN=glyA PE=3 SV=2	Cytoplasmic Protein	4	90.2
Acinetobacter	Proteobacteria	Acinetobacter baumannii	sp|P34897|GLYM_HUMAN Serine hydroxymethyltransferase, mitochondrial OS=Homo sapiens GN=SHMT2 PE=1 SV=3	sp|B0VBB3|GLYA_ACIBY Serine hydroxymethyltransferase OS=Acinetobacter baumannii (strain AYE) GN=glyA PE=3 SV=1	Cytoplasmic Protein	1	53.1
Acinetobacter	Proteobacteria	Acinetobacter baumannii	sp|P34897|GLYM_HUMAN Serine hydroxymethyltransferase, mitochondrial OS=Homo sapiens GN=SHMT2 PE=1 SV=3	sp|B2HUY9|GLYA_ACIBC Serine hydroxymethyltransferase OS=Acinetobacter baumannii (strain ACICU) GN=glyA PE=3 SV=1	Cytoplasmic Protein	4	90.2
Acinetobacter	Proteobacteria	Acinetobacter baumannii	sp|P34897|GLYM_HUMAN Serine hydroxymethyltransferase, mitochondrial OS=Homo sapiens GN=SHMT2 PE=1 SV=3	sp|B7GZR6|GLYA_ACIB3 Serine hydroxymethyltransferase OS=Acinetobacter baumannii (strain AB307-0294) GN=glyA PE=3 SV=1	Cytoplasmic Protein	4	90.2
Acinetobacter	Proteobacteria	Acinetobacter baumannii	sp|P34897|GLYM_HUMAN Serine hydroxymethyltransferase, mitochondrial OS=Homo sapiens GN=SHMT2 PE=1 SV=3	sp|B7I2R7|GLYA_ACIB5 Serine hydroxymethyltransferase OS=Acinetobacter baumannii (strain AB0057) GN=glyA PE=3 SV=1	Cytoplasmic Protein	4	90.2
Acinetobacter	Proteobacteria	Acinetobacter baumannii	sp|P34897|GLYM_HUMAN Serine hydroxymethyltransferase, mitochondrial OS=Homo sapiens GN=SHMT2 PE=1 SV=3	sp|B0VLF5|GLYA_ACIBS Serine hydroxymethyltransferase OS=Acinetobacter baumannii (strain SDF) GN=glyA PE=3 SV=1	Cytoplasmic Protein	4	90.2
Acinetobacter	Proteobacteria	Acinetobacter baumannii	sp|P11021|GRP78_HUMAN 78 kDa glucose-regulated protein OS=Homo sapiens GN=HSPA5 PE=1 SV=2	sp|A3M8W9|DNAK_ACIBT Chaperone protein DnaK OS=Acinetobacter baumannii (strain ATCC 17978 / CIP 53.77 / LMG 1025 / NCDC KC755 / 5377) GN=dnaK PE=3 SV=2	Cytoplasmic Protein	4	90.2
Acinetobacter	Proteobacteria	Acinetobacter baumannii	sp|P11021|GRP78_HUMAN 78 kDa glucose-regulated protein OS=Homo sapiens GN=HSPA5 PE=1 SV=2	sp|B2HZZ7|DNAK_ACIBC Chaperone protein DnaK OS=Acinetobacter baumannii (strain ACICU) GN=dnaK PE=3 SV=1	Cytoplasmic Protein	1	53.1
Acinetobacter	Proteobacteria	Acinetobacter baumannii	sp|P11021|GRP78_HUMAN 78 kDa glucose-regulated protein OS=Homo sapiens GN=HSPA5 PE=1 SV=2	sp|B0V5U4|DNAK_ACIBY Chaperone protein DnaK OS=Acinetobacter baumannii (strain AYE) GN=dnaK PE=3 SV=1	Cytoplasmic Protein	4	90.2
Acinetobacter	Proteobacteria	Acinetobacter baumannii	sp|P11021|GRP78_HUMAN 78 kDa glucose-regulated protein OS=Homo sapiens GN=HSPA5 PE=1 SV=2	sp|B7IBK5|DNAK_ACIB5 Chaperone protein DnaK OS=Acinetobacter baumannii (strain AB0057) GN=dnaK PE=3 SV=1	Cytoplasmic Protein	4	90.2
Acinetobacter	Proteobacteria	Acinetobacter baumannii	sp|P11021|GRP78_HUMAN 78 kDa glucose-regulated protein OS=Homo sapiens GN=HSPA5 PE=1 SV=2	sp|B7H317|DNAK_ACIB3 Chaperone protein DnaK OS=Acinetobacter baumannii (strain AB307-0294) GN=dnaK PE=3 SV=1	Cytoplasmic Protein	4	90.2
Acinetobacter	Proteobacteria	Acinetobacter baylyi	sp|P11021|GRP78_HUMAN 78 kDa glucose-regulated protein OS=Homo sapiens GN=HSPA5 PE=1 SV=2	sp|Q6F6N3|DNAK_ACIAD Chaperone protein DnaK OS=Acinetobacter baylyi (strain ATCC 33305 / BD413 / ADP1) GN=dnaK PE=3 SV=1	Cytoplasmic Protein	4	90.2
Acinetobacter	Proteobacteria	Acinetobacter baylyi	sp|P49915|GUAA_HUMAN GMP synthase [glutamine-hydrolyzing] OS=Homo sapiens GN=GMPS PE=1 SV=1	sp|Q6FFN2|GUAA_ACIAD GMP synthase [glutamine-hydrolyzing] OS=Acinetobacter baylyi (strain ATCC 33305 / BD413 / ADP1) GN=guaA PE=3 SV=1	Cytoplasmic Protein	1	53.1
Acinetobacter	Proteobacteria	Acinetobacter calcoaceticus	sp|P00390|GSHR_HUMAN Glutathione reductase, mitochondrial OS=Homo sapiens GN=GSR PE=1 SV=2	sp|Q52109|MERA_ACICA Mercuric reductase OS=Acinetobacter calcoaceticus GN=merA PE=3 SV=1	Cytoplasmic Protein	4	90.2
Acinetobacter	Proteobacteria	Acinetobacter baumannii	sp|Q8N442|GUF1_HUMAN Translation factor GUF1, mitochondrial OS=Homo sapiens GN=GUF1 PE=1 SV=1	sp|B0VCT7|LEPA_ACIBY Elongation factor 4 OS=Acinetobacter baumannii (strain AYE) GN=lepA PE=3 SV=1	Cytoplasmic Protein	4	90.2
Acinetobacter	Proteobacteria	Acinetobacter baumannii	sp|Q8N442|GUF1_HUMAN Translation factor GUF1, mitochondrial OS=Homo sapiens GN=GUF1 PE=1 SV=1	sp|A3M7P5|LEPA_ACIBT Elongation factor 4 OS=Acinetobacter baumannii (strain ATCC 17978 / CIP 53.77 / LMG 1025 / NCDC KC755 / 5377) GN=lepA PE=3 SV=2	Cytoplasmic Protein	1	53.1
Acinetobacter	Proteobacteria	Acinetobacter baumannii	sp|Q8N442|GUF1_HUMAN Translation factor GUF1, mitochondrial OS=Homo sapiens GN=GUF1 PE=1 SV=1	sp|B2HWQ2|LEPA_ACIBC Elongation factor 4 OS=Acinetobacter baumannii (strain ACICU) GN=lepA PE=3 SV=1	Cytoplasmic Protein	4	90.2
Acinetobacter	Proteobacteria	Acinetobacter baumannii	sp|Q8N442|GUF1_HUMAN Translation factor GUF1, mitochondrial OS=Homo sapiens GN=GUF1 PE=1 SV=1	sp|B7I580|LEPA_ACIB5 Elongation factor 4 OS=Acinetobacter baumannii (strain AB0057) GN=lepA PE=3 SV=1	Cytoplasmic Protein	4	90.2
Acinetobacter	Proteobacteria	Acinetobacter baumannii	sp|Q8N442|GUF1_HUMAN Translation factor GUF1, mitochondrial OS=Homo sapiens GN=GUF1 PE=1 SV=1	sp|B7GYS7|LEPA_ACIB3 Elongation factor 4 OS=Acinetobacter baumannii (strain AB307-0294) GN=lepA PE=3 SV=1	Cytoplasmic Protein	5	98.1
Acinetobacter	Proteobacteria	Acinetobacter baumannii	sp|Q8N442|GUF1_HUMAN Translation factor GUF1, mitochondrial OS=Homo sapiens GN=GUF1 PE=1 SV=1	sp|B0VTM2|LEPA_ACIBS Elongation factor 4 OS=Acinetobacter baumannii (strain SDF) GN=lepA PE=3 SV=1	Cytoplasmic Protein	4	90.2
Acinetobacter	Proteobacteria	Acinetobacter baylyi	sp|Q8N442|GUF1_HUMAN Translation factor GUF1, mitochondrial OS=Homo sapiens GN=GUF1 PE=1 SV=1	sp|Q6F9B9|LEPA_ACIAD Elongation factor 4 OS=Acinetobacter baylyi (strain ATCC 33305 / BD413 / ADP1) GN=lepA PE=3 SV=1	Cytoplasmic Protein	1	53.1
Acinetobacter	Proteobacteria	Acinetobacter baylyi	sp|Q9NYQ3|HAOX2_HUMAN Hydroxyacid oxidase 2 OS=Homo sapiens GN=HAO2 PE=1 SV=1	sp|Q6FFS1|LLDD_ACIAD L-lactate dehydrogenase OS=Acinetobacter baylyi (strain ATCC 33305 / BD413 / ADP1) GN=lldD PE=3 SV=1	Cytoplasmic Protein	4	90.2
Acinetobacter	Proteobacteria	Acinetobacter baumannii	sp|Q9NYQ3|HAOX2_HUMAN Hydroxyacid oxidase 2 OS=Homo sapiens GN=HAO2 PE=1 SV=1	sp|B0VND0|LLDD_ACIBS L-lactate dehydrogenase OS=Acinetobacter baumannii (strain SDF) GN=lldD PE=3 SV=1	Cytoplasmic Protein	4	90.2
Acinetobacter	Proteobacteria	Acinetobacter baumannii	sp|Q9NYQ3|HAOX2_HUMAN Hydroxyacid oxidase 2 OS=Homo sapiens GN=HAO2 PE=1 SV=1	sp|B7IBS4|LLDD_ACIB5 L-lactate dehydrogenase OS=Acinetobacter baumannii (strain AB0057) GN=lldD PE=3 SV=1	Cytoplasmic Protein	4	90.2
Acinetobacter	Proteobacteria	Acinetobacter baumannii	sp|Q9NYQ3|HAOX2_HUMAN Hydroxyacid oxidase 2 OS=Homo sapiens GN=HAO2 PE=1 SV=1	sp|B0V6L1|LLDD_ACIBY L-lactate dehydrogenase OS=Acinetobacter baumannii (strain AYE) GN=lldD PE=3 SV=1	Cytoplasmic Protein	4	90.2
Acinetobacter	Proteobacteria	Acinetobacter baumannii	sp|Q9NYQ3|HAOX2_HUMAN Hydroxyacid oxidase 2 OS=Homo sapiens GN=HAO2 PE=1 SV=1	sp|A3M0X0|LLDD_ACIBT L-lactate dehydrogenase OS=Acinetobacter baumannii (strain ATCC 17978 / CIP 53.77 / LMG 1025 / NCDC KC755 / 5377) GN=lldD PE=3 SV=2	Cytoplasmic Protein	1	53.1
Acinetobacter	Proteobacteria	Acinetobacter baumannii	sp|Q9NYQ3|HAOX2_HUMAN Hydroxyacid oxidase 2 OS=Homo sapiens GN=HAO2 PE=1 SV=1	sp|B2I061|LLDD_ACIBC L-lactate dehydrogenase OS=Acinetobacter baumannii (strain ACICU) GN=lldD PE=3 SV=1	Cytoplasmic Protein	4	90.2
Acinetobacter	Proteobacteria	Acinetobacter baumannii	sp|Q9NYQ3|HAOX2_HUMAN Hydroxyacid oxidase 2 OS=Homo sapiens GN=HAO2 PE=1 SV=1	sp|B7H2H0|LLDD_ACIB3 L-lactate dehydrogenase OS=Acinetobacter baumannii (strain AB307-0294) GN=lldD PE=3 SV=1	Cytoplasmic Protein	4	90.2
Acinetobacter	Proteobacteria	Acinetobacter baumannii	sp|Q96N76|HUTU_HUMAN Urocanate hydratase OS=Homo sapiens GN=UROC1 PE=1 SV=1	sp|B2I2C4|HUTU_ACIBC Urocanate hydratase OS=Acinetobacter baumannii (strain ACICU) GN=hutU PE=3 SV=1	Cytoplasmic Protein	4	90.2
Acinetobacter	Proteobacteria	Acinetobacter baumannii	sp|Q96N76|HUTU_HUMAN Urocanate hydratase OS=Homo sapiens GN=UROC1 PE=1 SV=1	sp|B0V9X6|HUTU_ACIBY Urocanate hydratase OS=Acinetobacter baumannii (strain AYE) GN=hutU PE=3 SV=1	Cytoplasmic Protein	4	90.2
Acinetobacter	Proteobacteria	Acinetobacter baumannii	sp|Q96N76|HUTU_HUMAN Urocanate hydratase OS=Homo sapiens GN=UROC1 PE=1 SV=1	sp|B7I271|HUTU_ACIB5 Urocanate hydratase OS=Acinetobacter baumannii (strain AB0057) GN=hutU PE=3 SV=1	Cytoplasmic Protein	4	90.2
Acinetobacter	Proteobacteria	Acinetobacter baumannii	sp|Q96N76|HUTU_HUMAN Urocanate hydratase OS=Homo sapiens GN=UROC1 PE=1 SV=1	sp|B7GUU5|HUTU_ACIB3 Urocanate hydratase OS=Acinetobacter baumannii (strain AB307-0294) GN=hutU PE=3 SV=1	Cytoplasmic Protein	4	90.2
Acinetobacter	Proteobacteria	Acinetobacter baumannii	sp|Q96N76|HUTU_HUMAN Urocanate hydratase OS=Homo sapiens GN=UROC1 PE=1 SV=1	sp|B0VPV2|HUTU_ACIBS Urocanate hydratase OS=Acinetobacter baumannii (strain SDF) GN=hutU PE=3 SV=1	Cytoplasmic Protein	4	90.2
Acinetobacter	Proteobacteria	Acinetobacter baumannii	sp|P46199|IF2M_HUMAN Translation initiation factor IF-2, mitochondrial OS=Homo sapiens GN=MTIF2 PE=1 SV=2	sp|B0VLU2|IF2_ACIBS Translation initiation factor IF-2 OS=Acinetobacter baumannii (strain SDF) GN=infB PE=3 SV=1	Cytoplasmic Protein	1	53.1
Acinetobacter	Proteobacteria	Acinetobacter baumannii	sp|P46199|IF2M_HUMAN Translation initiation factor IF-2, mitochondrial OS=Homo sapiens GN=MTIF2 PE=1 SV=2	sp|B0VE81|IF2_ACIBY Translation initiation factor IF-2 OS=Acinetobacter baumannii (strain AYE) GN=infB PE=3 SV=1	Cytoplasmic Protein	4	90.2
Acinetobacter	Proteobacteria	Acinetobacter baumannii	sp|P46199|IF2M_HUMAN Translation initiation factor IF-2, mitochondrial OS=Homo sapiens GN=MTIF2 PE=1 SV=2	sp|B2I2M7|IF2_ACIBC Translation initiation factor IF-2 OS=Acinetobacter baumannii (strain ACICU) GN=infB PE=3 SV=1	Cytoplasmic Protein	1	53.1
Acinetobacter	Proteobacteria	Acinetobacter baumannii	sp|P46199|IF2M_HUMAN Translation initiation factor IF-2, mitochondrial OS=Homo sapiens GN=MTIF2 PE=1 SV=2	sp|B7I3R9|IF2_ACIB5 Translation initiation factor IF-2 OS=Acinetobacter baumannii (strain AB0057) GN=infB PE=3 SV=1	Cytoplasmic Protein	4	90.2
Acinetobacter	Proteobacteria	Acinetobacter baumannii	sp|P46199|IF2M_HUMAN Translation initiation factor IF-2, mitochondrial OS=Homo sapiens GN=MTIF2 PE=1 SV=2	sp|B7H115|IF2_ACIB3 Translation initiation factor IF-2 OS=Acinetobacter baumannii (strain AB307-0294) GN=infB PE=3 SV=1	Cytoplasmic Protein	1	53.1
Acinetobacter	Proteobacteria	Acinetobacter baylyi	sp|P46199|IF2M_HUMAN Translation initiation factor IF-2, mitochondrial OS=Homo sapiens GN=MTIF2 PE=1 SV=2	sp|Q6FF40|IF2_ACIAD Translation initiation factor IF-2 OS=Acinetobacter baylyi (strain ATCC 33305 / BD413 / ADP1) GN=infB PE=3 SV=1	Cytoplasmic Protein	4	90.2
Acinetobacter	Proteobacteria	Acinetobacter baylyi	sp|Q6NXR0|IIGP5_HUMAN Interferon-inducible GTPase 5 OS=Homo sapiens GN=IRGC PE=2 SV=1	sp|Q6FAN3|METN1_ACIAD Methionine import ATP-binding protein MetN 1 OS=Acinetobacter baylyi (strain ATCC 33305 / BD413 / ADP1) GN=metN1 PE=3 SV=1	Cytoplasmic Protein	4	90.2
Acinetobacter	Proteobacteria	Acinetobacter baylyi	sp|P54819|KAD2_HUMAN Adenylate kinase 2, mitochondrial OS=Homo sapiens GN=AK2 PE=1 SV=2	sp|Q6FD71|KAD_ACIAD Adenylate kinase OS=Acinetobacter baylyi (strain ATCC 33305 / BD413 / ADP1) GN=adk PE=3 SV=1	Cytoplasmic Protein	4	90.2
Acinetobacter	Proteobacteria	Acinetobacter baumannii	sp|P54819|KAD2_HUMAN Adenylate kinase 2, mitochondrial OS=Homo sapiens GN=AK2 PE=1 SV=2	sp|B0VSA9|KAD_ACIBS Adenylate kinase OS=Acinetobacter baumannii (strain SDF) GN=adk PE=3 SV=1	Cytoplasmic Protein	4	90.2
Acinetobacter	Proteobacteria	Acinetobacter baumannii	sp|P54819|KAD2_HUMAN Adenylate kinase 2, mitochondrial OS=Homo sapiens GN=AK2 PE=1 SV=2	sp|A3M3G1|KAD_ACIBT Adenylate kinase OS=Acinetobacter baumannii (strain ATCC 17978 / CIP 53.77 / LMG 1025 / NCDC KC755 / 5377) GN=adk PE=3 SV=2	Cytoplasmic Protein	4	90.2
Acinetobacter	Proteobacteria	Acinetobacter baumannii	sp|P54819|KAD2_HUMAN Adenylate kinase 2, mitochondrial OS=Homo sapiens GN=AK2 PE=1 SV=2	sp|B0V9Q9|KAD_ACIBY Adenylate kinase OS=Acinetobacter baumannii (strain AYE) GN=adk PE=3 SV=1	Cytoplasmic Protein	4	90.2
Acinetobacter	Proteobacteria	Acinetobacter baumannii	sp|P54819|KAD2_HUMAN Adenylate kinase 2, mitochondrial OS=Homo sapiens GN=AK2 PE=1 SV=2	sp|B2HVT0|KAD_ACIBC Adenylate kinase OS=Acinetobacter baumannii (strain ACICU) GN=adk PE=3 SV=1	Cytoplasmic Protein	1	53.1
Acinetobacter	Proteobacteria	Acinetobacter baumannii	sp|P54819|KAD2_HUMAN Adenylate kinase 2, mitochondrial OS=Homo sapiens GN=AK2 PE=1 SV=2	sp|B7GXT4|KAD_ACIB3 Adenylate kinase OS=Acinetobacter baumannii (strain AB307-0294) GN=adk PE=3 SV=1	Cytoplasmic Protein	4	90.2
Acinetobacter	Proteobacteria	Acinetobacter baumannii	sp|P54819|KAD2_HUMAN Adenylate kinase 2, mitochondrial OS=Homo sapiens GN=AK2 PE=1 SV=2	sp|B7I8U4|KAD_ACIB5 Adenylate kinase OS=Acinetobacter baumannii (strain AB0057) GN=adk PE=3 SV=1	Cytoplasmic Protein	1	53.1
Acinetobacter	Proteobacteria	Acinetobacter baumannii	sp|P36776|LONM_HUMAN Lon protease homolog, mitochondrial OS=Homo sapiens GN=LONP1 PE=1 SV=2	sp|B7GXS7|LON_ACIB3 Lon protease OS=Acinetobacter baumannii (strain AB307-0294) GN=lon PE=3 SV=1	Cytoplasmic Protein	4	90.2
Acinetobacter	Proteobacteria	Acinetobacter baylyi	sp|P48163|MAOX_HUMAN NADP-dependent malic enzyme OS=Homo sapiens GN=ME1 PE=1 SV=1	sp|Q6FFL8|MAO1_ACIAD NAD-dependent malic enzyme OS=Acinetobacter baylyi (strain ATCC 33305 / BD413 / ADP1) GN=maeA PE=3 SV=1	Cytoplasmic Protein	3	71.1
Acinetobacter	Proteobacteria	Acinetobacter baumannii	sp|A6NJ78|MET15_HUMAN Probable methyltransferase-like protein 15 OS=Homo sapiens GN=METTL15 PE=1 SV=1	sp|B0VPF9|RSMH_ACIBS Ribosomal RNA small subunit methyltransferase H OS=Acinetobacter baumannii (strain SDF) GN=rsmH PE=3 SV=1	Cytoplasmic Protein	1	53.1
Acinetobacter	Proteobacteria	Acinetobacter baumannii	sp|A6NJ78|MET15_HUMAN Probable methyltransferase-like protein 15 OS=Homo sapiens GN=METTL15 PE=1 SV=1	sp|B0V8N7|RSMH_ACIBY Ribosomal RNA small subunit methyltransferase H OS=Acinetobacter baumannii (strain AYE) GN=rsmH PE=3 SV=1	Cytoplasmic Protein	1	53.1
Acinetobacter	Proteobacteria	Acinetobacter baumannii	sp|A6NJ78|MET15_HUMAN Probable methyltransferase-like protein 15 OS=Homo sapiens GN=METTL15 PE=1 SV=1	sp|A3M9K5|RSMH_ACIBT Ribosomal RNA small subunit methyltransferase H OS=Acinetobacter baumannii (strain ATCC 17978 / CIP 53.77 / LMG 1025 / NCDC KC755 / 5377) GN=rsmH PE=3 SV=2	Cytoplasmic Protein	4	90.2
Acinetobacter	Proteobacteria	Acinetobacter baumannii	sp|A6NJ78|MET15_HUMAN Probable methyltransferase-like protein 15 OS=Homo sapiens GN=METTL15 PE=1 SV=1	sp|B2I0K7|RSMH_ACIBC Ribosomal RNA small subunit methyltransferase H OS=Acinetobacter baumannii (strain ACICU) GN=rsmH PE=3 SV=1	Cytoplasmic Protein	4	90.2
Acinetobacter	Proteobacteria	Acinetobacter baumannii	sp|A6NJ78|MET15_HUMAN Probable methyltransferase-like protein 15 OS=Homo sapiens GN=METTL15 PE=1 SV=1	sp|B7GVN1|RSMH_ACIB3 Ribosomal RNA small subunit methyltransferase H OS=Acinetobacter baumannii (strain AB307-0294) GN=rsmH PE=3 SV=1	Cytoplasmic Protein	4	90.2
Acinetobacter	Proteobacteria	Acinetobacter baumannii	sp|A6NJ78|MET15_HUMAN Probable methyltransferase-like protein 15 OS=Homo sapiens GN=METTL15 PE=1 SV=1	sp|B7IAX1|RSMH_ACIB5 Ribosomal RNA small subunit methyltransferase H OS=Acinetobacter baumannii (strain AB0057) GN=rsmH PE=3 SV=1	Cytoplasmic Protein	4	90.2
Acinetobacter	Proteobacteria	Acinetobacter baylyi	sp|A6NJ78|MET15_HUMAN Probable methyltransferase-like protein 15 OS=Homo sapiens GN=METTL15 PE=1 SV=1	sp|Q6F7D1|RSMH_ACIAD Ribosomal RNA small subunit methyltransferase H OS=Acinetobacter baylyi (strain ATCC 33305 / BD413 / ADP1) GN=rsmH PE=3 SV=1	Cytoplasmic Protein	4	90.2
Acinetobacter	Proteobacteria	Acinetobacter baylyi	sp|Q00266|METK1_HUMAN S-adenosylmethionine synthase isoform type-1 OS=Homo sapiens GN=MAT1A PE=1 SV=2	sp|Q6FAQ6|METK_ACIAD S-adenosylmethionine synthase OS=Acinetobacter baylyi (strain ATCC 33305 / BD413 / ADP1) GN=metK PE=3 SV=1	Cytoplasmic Protein	4	90.2
Acinetobacter	Proteobacteria	Acinetobacter baumannii	sp|Q00266|METK1_HUMAN S-adenosylmethionine synthase isoform type-1 OS=Homo sapiens GN=MAT1A PE=1 SV=2	sp|B0VC98|METK_ACIBY S-adenosylmethionine synthase OS=Acinetobacter baumannii (strain AYE) GN=metK PE=3 SV=1	Cytoplasmic Protein	1	53.1
Acinetobacter	Proteobacteria	Acinetobacter baumannii	sp|Q00266|METK1_HUMAN S-adenosylmethionine synthase isoform type-1 OS=Homo sapiens GN=MAT1A PE=1 SV=2	sp|A3M4V2|METK_ACIBT S-adenosylmethionine synthase OS=Acinetobacter baumannii (strain ATCC 17978 / CIP 53.77 / LMG 1025 / NCDC KC755 / 5377) GN=metK PE=3 SV=2	Cytoplasmic Protein	4	90.2
Acinetobacter	Proteobacteria	Acinetobacter baumannii	sp|Q00266|METK1_HUMAN S-adenosylmethionine synthase isoform type-1 OS=Homo sapiens GN=MAT1A PE=1 SV=2	sp|B0VR30|METK_ACIBS S-adenosylmethionine synthase OS=Acinetobacter baumannii (strain SDF) GN=metK PE=3 SV=1	Cytoplasmic Protein	4	90.2
Acinetobacter	Proteobacteria	Acinetobacter baumannii	sp|Q00266|METK1_HUMAN S-adenosylmethionine synthase isoform type-1 OS=Homo sapiens GN=MAT1A PE=1 SV=2	sp|B2HYY9|METK_ACIBC S-adenosylmethionine synthase OS=Acinetobacter baumannii (strain ACICU) GN=metK PE=3 SV=1	Cytoplasmic Protein	4	90.2
Acinetobacter	Proteobacteria	Acinetobacter baylyi	sp|P40925|MDHC_HUMAN Malate dehydrogenase, cytoplasmic OS=Homo sapiens GN=MDH1 PE=1 SV=4	sp|Q6F7X1|MDH_ACIAD Malate dehydrogenase OS=Acinetobacter baylyi (strain ATCC 33305 / BD413 / ADP1) GN=mdh PE=3 SV=1	Cytoplasmic Protein	4	90.2
Acinetobacter	Proteobacteria	Acinetobacter baumannii	sp|P40925|MDHC_HUMAN Malate dehydrogenase, cytoplasmic OS=Homo sapiens GN=MDH1 PE=1 SV=4	sp|B0V6R7|MDH_ACIBY Malate dehydrogenase OS=Acinetobacter baumannii (strain AYE) GN=mdh PE=3 SV=1	Cytoplasmic Protein	4	90.2
Acinetobacter	Proteobacteria	Acinetobacter baumannii	sp|P40925|MDHC_HUMAN Malate dehydrogenase, cytoplasmic OS=Homo sapiens GN=MDH1 PE=1 SV=4	sp|A3M928|MDH_ACIBT Malate dehydrogenase OS=Acinetobacter baumannii (strain ATCC 17978 / CIP 53.77 / LMG 1025 / NCDC KC755 / 5377) GN=mdh PE=3 SV=2	Cytoplasmic Protein	1	53.1
Acinetobacter	Proteobacteria	Acinetobacter baumannii	sp|P40925|MDHC_HUMAN Malate dehydrogenase, cytoplasmic OS=Homo sapiens GN=MDH1 PE=1 SV=4	sp|B2HZ52|MDH_ACIBC Malate dehydrogenase OS=Acinetobacter baumannii (strain ACICU) GN=mdh PE=3 SV=1	Cytoplasmic Protein	4	90.2
Acinetobacter	Proteobacteria	Acinetobacter baumannii	sp|P40925|MDHC_HUMAN Malate dehydrogenase, cytoplasmic OS=Homo sapiens GN=MDH1 PE=1 SV=4	sp|B7I9D2|MDH_ACIB5 Malate dehydrogenase OS=Acinetobacter baumannii (strain AB0057) GN=mdh PE=3 SV=1	Cytoplasmic Protein	4	90.2
Acinetobacter	Proteobacteria	Acinetobacter baumannii	sp|P40925|MDHC_HUMAN Malate dehydrogenase, cytoplasmic OS=Homo sapiens GN=MDH1 PE=1 SV=4	sp|B7GW58|MDH_ACIB3 Malate dehydrogenase OS=Acinetobacter baumannii (strain AB307-0294) GN=mdh PE=3 SV=1	Cytoplasmic Protein	1	53.1
Acinetobacter	Proteobacteria	Acinetobacter baumannii	sp|P40925|MDHC_HUMAN Malate dehydrogenase, cytoplasmic OS=Homo sapiens GN=MDH1 PE=1 SV=4	sp|B0VQX5|MDH_ACIBS Malate dehydrogenase OS=Acinetobacter baumannii (strain SDF) GN=mdh PE=3 SV=1	Cytoplasmic Protein	4	90.2
Acinetobacter	Proteobacteria	Acinetobacter baylyi	sp|Q6IN84|MRM1_HUMAN rRNA methyltransferase 1, mitochondrial OS=Homo sapiens GN=MRM1 PE=1 SV=1	sp|Q6FF50|RLMB_ACIAD 23S rRNA (guanosine-2'-O-)-methyltransferase RlmB OS=Acinetobacter baylyi (strain ATCC 33305 / BD413 / ADP1) GN=rlmB PE=3 SV=1	Cytoplasmic Protein	3	71.1
Acinetobacter	Proteobacteria	Acinetobacter baumannii	sp|P43246|MSH2_HUMAN DNA mismatch repair protein Msh2 OS=Homo sapiens GN=MSH2 PE=1 SV=1	sp|B0VAU7|MUTS_ACIBY DNA mismatch repair protein MutS OS=Acinetobacter baumannii (strain AYE) GN=mutS PE=3 SV=1	Cytoplasmic Protein	4	90.2
Acinetobacter	Proteobacteria	Acinetobacter baumannii	sp|P43246|MSH2_HUMAN DNA mismatch repair protein Msh2 OS=Homo sapiens GN=MSH2 PE=1 SV=1	sp|B2HX50|MUTS_ACIBC DNA mismatch repair protein MutS OS=Acinetobacter baumannii (strain ACICU) GN=mutS PE=3 SV=1	Cytoplasmic Protein	4	90.2
Acinetobacter	Proteobacteria	Acinetobacter baumannii	sp|P43246|MSH2_HUMAN DNA mismatch repair protein Msh2 OS=Homo sapiens GN=MSH2 PE=1 SV=1	sp|B7IBV9|MUTS_ACIB5 DNA mismatch repair protein MutS OS=Acinetobacter baumannii (strain AB0057) GN=mutS PE=3 SV=1	Cytoplasmic Protein	4	90.2
Acinetobacter	Proteobacteria	Acinetobacter baumannii	sp|P43246|MSH2_HUMAN DNA mismatch repair protein Msh2 OS=Homo sapiens GN=MSH2 PE=1 SV=1	sp|B7GW85|MUTS_ACIB3 DNA mismatch repair protein MutS OS=Acinetobacter baumannii (strain AB307-0294) GN=mutS PE=3 SV=1	Cytoplasmic Protein	4	90.2
Acinetobacter	Proteobacteria	Acinetobacter baumannii	sp|P43246|MSH2_HUMAN DNA mismatch repair protein Msh2 OS=Homo sapiens GN=MSH2 PE=1 SV=1	sp|B0VUC9|MUTS_ACIBS DNA mismatch repair protein MutS OS=Acinetobacter baumannii (strain SDF) GN=mutS PE=3 SV=1	Cytoplasmic Protein	4	90.2
Acinetobacter	Proteobacteria	Acinetobacter baylyi	sp|P43246|MSH2_HUMAN DNA mismatch repair protein Msh2 OS=Homo sapiens GN=MSH2 PE=1 SV=1	sp|Q6FC54|MUTS_ACIAD DNA mismatch repair protein MutS OS=Acinetobacter baylyi (strain ATCC 33305 / BD413 / ADP1) GN=mutS PE=3 SV=1	Cytoplasmic Protein	1	53.1
Acinetobacter	Proteobacteria	Acinetobacter baumannii	sp|Q9Y3D2|MSRB2_HUMAN Methionine-R-sulfoxide reductase B2, mitochondrial OS=Homo sapiens GN=MSRB2 PE=1 SV=2	sp|B2HYT2|MSRB_ACIBC Peptide methionine sulfoxide reductase MsrB OS=Acinetobacter baumannii (strain ACICU) GN=msrB PE=3 SV=1	Cytoplasmic Protein	1	53.1
Acinetobacter	Proteobacteria	Acinetobacter baumannii	sp|Q9Y3D2|MSRB2_HUMAN Methionine-R-sulfoxide reductase B2, mitochondrial OS=Homo sapiens GN=MSRB2 PE=1 SV=2	sp|A3M4Q3|MSRB_ACIBT Peptide methionine sulfoxide reductase MsrB OS=Acinetobacter baumannii (strain ATCC 17978 / CIP 53.77 / LMG 1025 / NCDC KC755 / 5377) GN=msrB PE=3 SV=2	Cytoplasmic Protein	4	90.2
Acinetobacter	Proteobacteria	Acinetobacter baumannii	sp|Q9Y3D2|MSRB2_HUMAN Methionine-R-sulfoxide reductase B2, mitochondrial OS=Homo sapiens GN=MSRB2 PE=1 SV=2	sp|B7I415|MSRB_ACIB5 Peptide methionine sulfoxide reductase MsrB OS=Acinetobacter baumannii (strain AB0057) GN=msrB PE=3 SV=1	Cytoplasmic Protein	2	68.1
Acinetobacter	Proteobacteria	Acinetobacter baumannii	sp|Q9Y3D2|MSRB2_HUMAN Methionine-R-sulfoxide reductase B2, mitochondrial OS=Homo sapiens GN=MSRB2 PE=1 SV=2	sp|B0VC45|MSRB_ACIBY Peptide methionine sulfoxide reductase MsrB OS=Acinetobacter baumannii (strain AYE) GN=msrB PE=3 SV=1	Cytoplasmic Protein	1	53.1
Acinetobacter	Proteobacteria	Acinetobacter baumannii	sp|Q9Y3D2|MSRB2_HUMAN Methionine-R-sulfoxide reductase B2, mitochondrial OS=Homo sapiens GN=MSRB2 PE=1 SV=2	sp|B7H3X2|MSRB_ACIB3 Peptide methionine sulfoxide reductase MsrB OS=Acinetobacter baumannii (strain AB307-0294) GN=msrB PE=3 SV=1	Cytoplasmic Protein	4	90.2
Acinetobacter	Proteobacteria	Acinetobacter baumannii	sp|Q9Y3D2|MSRB2_HUMAN Methionine-R-sulfoxide reductase B2, mitochondrial OS=Homo sapiens GN=MSRB2 PE=1 SV=2	sp|B0VR86|MSRB_ACIBS Peptide methionine sulfoxide reductase MsrB OS=Acinetobacter baumannii (strain SDF) GN=msrB PE=3 SV=1	Cytoplasmic Protein	4	90.2
Acinetobacter	Proteobacteria	Acinetobacter baylyi	sp|P13995|MTDC_HUMAN Bifunctional methylenetetrahydrofolate dehydrogenase/cyclohydrolase, mitochondrial OS=Homo sapiens GN=MTHFD2 PE=1 SV=2	sp|Q6F9E6|FOLD1_ACIAD Bifunctional protein FolD 1 OS=Acinetobacter baylyi (strain ATCC 33305 / BD413 / ADP1) GN=folD1 PE=3 SV=1	Cytoplasmic Protein	1	53.1
Acinetobacter	Proteobacteria	Acinetobacter baumannii	sp|Q9Y2Z2|MTO1_HUMAN Protein MTO1 homolog, mitochondrial OS=Homo sapiens GN=MTO1 PE=1 SV=2	sp|B0V7I0|MNMG_ACIBY tRNA uridine 5-carboxymethylaminomethyl modification enzyme MnmG OS=Acinetobacter baumannii (strain AYE) GN=mnmG PE=3 SV=1	Cytoplasmic Protein	4	90.2
Acinetobacter	Proteobacteria	Acinetobacter baumannii	sp|Q9Y2Z2|MTO1_HUMAN Protein MTO1 homolog, mitochondrial OS=Homo sapiens GN=MTO1 PE=1 SV=2	sp|B7IC15|MNMG_ACIB5 tRNA uridine 5-carboxymethylaminomethyl modification enzyme MnmG OS=Acinetobacter baumannii (strain AB0057) GN=mnmG PE=3 SV=1	Cytoplasmic Protein	4	90.2
Acinetobacter	Proteobacteria	Acinetobacter baumannii	sp|Q9Y2Z2|MTO1_HUMAN Protein MTO1 homolog, mitochondrial OS=Homo sapiens GN=MTO1 PE=1 SV=2	sp|B7H0I9|MNMG_ACIB3 tRNA uridine 5-carboxymethylaminomethyl modification enzyme MnmG OS=Acinetobacter baumannii (strain AB307-0294) GN=mnmG PE=3 SV=1	Cytoplasmic Protein	4	90.2
Acinetobacter	Proteobacteria	Acinetobacter baumannii	sp|Q9Y2Z2|MTO1_HUMAN Protein MTO1 homolog, mitochondrial OS=Homo sapiens GN=MTO1 PE=1 SV=2	sp|A3M6R5|MNMG_ACIBT tRNA uridine 5-carboxymethylaminomethyl modification enzyme MnmG OS=Acinetobacter baumannii (strain ATCC 17978 / CIP 53.77 / LMG 1025 / NCDC KC755 / 5377) GN=mnmG PE=3 SV=2	Cytoplasmic Protein	4	90.2
Acinetobacter	Proteobacteria	Acinetobacter baumannii	sp|Q9Y2Z2|MTO1_HUMAN Protein MTO1 homolog, mitochondrial OS=Homo sapiens GN=MTO1 PE=1 SV=2	sp|B2HUB2|MNMG_ACIBC tRNA uridine 5-carboxymethylaminomethyl modification enzyme MnmG OS=Acinetobacter baumannii (strain ACICU) GN=mnmG PE=3 SV=1	Cytoplasmic Protein	1	53.1
Acinetobacter	Proteobacteria	Acinetobacter baumannii	sp|Q9Y2Z2|MTO1_HUMAN Protein MTO1 homolog, mitochondrial OS=Homo sapiens GN=MTO1 PE=1 SV=2	sp|B0VLL2|MNMG_ACIBS tRNA uridine 5-carboxymethylaminomethyl modification enzyme MnmG OS=Acinetobacter baumannii (strain SDF) GN=mnmG PE=3 SV=1	Cytoplasmic Protein	1	53.1
Acinetobacter	Proteobacteria	Acinetobacter baylyi	sp|Q9Y2Z2|MTO1_HUMAN Protein MTO1 homolog, mitochondrial OS=Homo sapiens GN=MTO1 PE=1 SV=2	sp|Q6F9Q1|MNMG_ACIAD tRNA uridine 5-carboxymethylaminomethyl modification enzyme MnmG OS=Acinetobacter baylyi (strain ATCC 33305 / BD413 / ADP1) GN=mnmG PE=3 SV=1	Cytoplasmic Protein	1	53.1
Acinetobacter	Proteobacteria	Acinetobacter baumannii	sp|Q9Y697|NFS1_HUMAN Cysteine desulfurase, mitochondrial OS=Homo sapiens GN=NFS1 PE=1 SV=3	sp|B0VD51|ISCS_ACIBY Cysteine desulfurase IscS OS=Acinetobacter baumannii (strain AYE) GN=iscS PE=3 SV=1	Cytoplasmic Protein	4	90.2
Acinetobacter	Proteobacteria	Acinetobacter baumannii	sp|Q9Y697|NFS1_HUMAN Cysteine desulfurase, mitochondrial OS=Homo sapiens GN=NFS1 PE=1 SV=3	sp|B7H3H0|ISCS_ACIB3 Cysteine desulfurase IscS OS=Acinetobacter baumannii (strain AB307-0294) GN=iscS PE=3 SV=1	Cytoplasmic Protein	4	90.2
Acinetobacter	Proteobacteria	Acinetobacter baumannii	sp|Q9Y697|NFS1_HUMAN Cysteine desulfurase, mitochondrial OS=Homo sapiens GN=NFS1 PE=1 SV=3	sp|B2HZI5|ISCS_ACIBC Cysteine desulfurase IscS OS=Acinetobacter baumannii (strain ACICU) GN=iscS PE=3 SV=1	Cytoplasmic Protein	1	53.1
Acinetobacter	Proteobacteria	Acinetobacter baumannii	sp|Q9Y697|NFS1_HUMAN Cysteine desulfurase, mitochondrial OS=Homo sapiens GN=NFS1 PE=1 SV=3	sp|B7I5Q3|ISCS_ACIB5 Cysteine desulfurase IscS OS=Acinetobacter baumannii (strain AB0057) GN=iscS PE=3 SV=1	Cytoplasmic Protein	4	90.2
Acinetobacter	Proteobacteria	Acinetobacter baumannii	sp|Q9Y697|NFS1_HUMAN Cysteine desulfurase, mitochondrial OS=Homo sapiens GN=NFS1 PE=1 SV=3	sp|B0VNW2|ISCS_ACIBS Cysteine desulfurase IscS OS=Acinetobacter baumannii (strain SDF) GN=iscS PE=3 SV=1	Cytoplasmic Protein	1	53.1
Acinetobacter	Proteobacteria	Acinetobacter baylyi	sp|P54886|P5CS_HUMAN Delta-1-pyrroline-5-carboxylate synthase OS=Homo sapiens GN=ALDH18A1 PE=1 SV=2	sp|Q6FEN5|PROA_ACIAD Gamma-glutamyl phosphate reductase OS=Acinetobacter baylyi (strain ATCC 33305 / BD413 / ADP1) GN=proA PE=3 SV=1	Cytoplasmic Protein	4	90.2
Acinetobacter	Proteobacteria	Acinetobacter baumannii	sp|P54886|P5CS_HUMAN Delta-1-pyrroline-5-carboxylate synthase OS=Homo sapiens GN=ALDH18A1 PE=1 SV=2	sp|B0VKT1|PROA_ACIBS Gamma-glutamyl phosphate reductase OS=Acinetobacter baumannii (strain SDF) GN=proA PE=3 SV=1	Cytoplasmic Protein	4	90.2
Acinetobacter	Proteobacteria	Acinetobacter baumannii	sp|P54886|P5CS_HUMAN Delta-1-pyrroline-5-carboxylate synthase OS=Homo sapiens GN=ALDH18A1 PE=1 SV=2	sp|B2I3D3|PROA_ACIBC Gamma-glutamyl phosphate reductase OS=Acinetobacter baumannii (strain ACICU) GN=proA PE=3 SV=1	Cytoplasmic Protein	4	90.2
Acinetobacter	Proteobacteria	Acinetobacter baumannii	sp|P54886|P5CS_HUMAN Delta-1-pyrroline-5-carboxylate synthase OS=Homo sapiens GN=ALDH18A1 PE=1 SV=2	sp|B0V4S6|PROA_ACIBY Gamma-glutamyl phosphate reductase OS=Acinetobacter baumannii (strain AYE) GN=proA PE=3 SV=1	Cytoplasmic Protein	5	98.1
Acinetobacter	Proteobacteria	Acinetobacter baumannii	sp|P54886|P5CS_HUMAN Delta-1-pyrroline-5-carboxylate synthase OS=Homo sapiens GN=ALDH18A1 PE=1 SV=2	sp|B7H081|PROA_ACIB3 Gamma-glutamyl phosphate reductase OS=Acinetobacter baumannii (strain AB307-0294) GN=proA PE=3 SV=1	Cytoplasmic Protein	4	90.2
Acinetobacter	Proteobacteria	Acinetobacter baumannii	sp|P54886|P5CS_HUMAN Delta-1-pyrroline-5-carboxylate synthase OS=Homo sapiens GN=ALDH18A1 PE=1 SV=2	sp|B7I5F5|PROA_ACIB5 Gamma-glutamyl phosphate reductase OS=Acinetobacter baumannii (strain AB0057) GN=proA PE=3 SV=1	Cytoplasmic Protein	4	90.2
Acinetobacter	Proteobacteria	Acinetobacter baumannii	sp|P54886|P5CS_HUMAN Delta-1-pyrroline-5-carboxylate synthase OS=Homo sapiens GN=ALDH18A1 PE=1 SV=2	sp|A3M1Z8|PROA_ACIBT Gamma-glutamyl phosphate reductase OS=Acinetobacter baumannii (strain ATCC 17978 / CIP 53.77 / LMG 1025 / NCDC KC755 / 5377) GN=proA PE=3 SV=2	Cytoplasmic Protein	4	90.2
Acinetobacter	Proteobacteria	Acinetobacter baylyi	sp|P35558|PCKGC_HUMAN Phosphoenolpyruvate carboxykinase, cytosolic [GTP] OS=Homo sapiens GN=PCK1 PE=1 SV=3	sp|Q6F8P2|PCKG_ACIAD Phosphoenolpyruvate carboxykinase [GTP] OS=Acinetobacter baylyi (strain ATCC 33305 / BD413 / ADP1) GN=pckG PE=3 SV=1	Cytoplasmic Protein	4	90.2
Acinetobacter	Proteobacteria	Acinetobacter baumannii	sp|P35558|PCKGC_HUMAN Phosphoenolpyruvate carboxykinase, cytosolic [GTP] OS=Homo sapiens GN=PCK1 PE=1 SV=3	sp|B0VSN6|PCKG_ACIBS Phosphoenolpyruvate carboxykinase [GTP] OS=Acinetobacter baumannii (strain SDF) GN=pckG PE=3 SV=1	Cytoplasmic Protein	1	53.1
Acinetobacter	Proteobacteria	Acinetobacter baumannii	sp|P35558|PCKGC_HUMAN Phosphoenolpyruvate carboxykinase, cytosolic [GTP] OS=Homo sapiens GN=PCK1 PE=1 SV=3	sp|B2HXC1|PCKG_ACIBC Phosphoenolpyruvate carboxykinase [GTP] OS=Acinetobacter baumannii (strain ACICU) GN=pckG PE=3 SV=1	Cytoplasmic Protein	3	71.1
Acinetobacter	Proteobacteria	Acinetobacter baumannii	sp|P35558|PCKGC_HUMAN Phosphoenolpyruvate carboxykinase, cytosolic [GTP] OS=Homo sapiens GN=PCK1 PE=1 SV=3	sp|A3M840|PCKG_ACIBT Phosphoenolpyruvate carboxykinase [GTP] OS=Acinetobacter baumannii (strain ATCC 17978 / CIP 53.77 / LMG 1025 / NCDC KC755 / 5377) GN=pckG PE=3 SV=2	Cytoplasmic Protein	3	71.1
Acinetobacter	Proteobacteria	Acinetobacter baumannii	sp|P35558|PCKGC_HUMAN Phosphoenolpyruvate carboxykinase, cytosolic [GTP] OS=Homo sapiens GN=PCK1 PE=1 SV=3	sp|B7GY31|PCKG_ACIB3 Phosphoenolpyruvate carboxykinase [GTP] OS=Acinetobacter baumannii (strain AB307-0294) GN=pckG PE=3 SV=1	Cytoplasmic Protein	4	90.2
Acinetobacter	Proteobacteria	Acinetobacter baumannii	sp|P35558|PCKGC_HUMAN Phosphoenolpyruvate carboxykinase, cytosolic [GTP] OS=Homo sapiens GN=PCK1 PE=1 SV=3	sp|B0VDR1|PCKG_ACIBY Phosphoenolpyruvate carboxykinase [GTP] OS=Acinetobacter baumannii (strain AYE) GN=pckG PE=3 SV=1	Cytoplasmic Protein	4	90.2
Acinetobacter	Proteobacteria	Acinetobacter baumannii	sp|P35558|PCKGC_HUMAN Phosphoenolpyruvate carboxykinase, cytosolic [GTP] OS=Homo sapiens GN=PCK1 PE=1 SV=3	sp|B7I624|PCKG_ACIB5 Phosphoenolpyruvate carboxykinase [GTP] OS=Acinetobacter baumannii (strain AB0057) GN=pckG PE=3 SV=1	Cytoplasmic Protein	4	90.2
Acinetobacter	Proteobacteria	Acinetobacter baumannii	sp|Q8NDH3|PEPL1_HUMAN Probable aminopeptidase NPEPL1 OS=Homo sapiens GN=NPEPL1 PE=1 SV=3	sp|B0VMG3|AMPA_ACIBS Probable cytosol aminopeptidase OS=Acinetobacter baumannii (strain SDF) GN=pepA PE=3 SV=1	Cytoplasmic Protein	4	90.2
Acinetobacter	Proteobacteria	Acinetobacter baumannii	sp|Q8NDH3|PEPL1_HUMAN Probable aminopeptidase NPEPL1 OS=Homo sapiens GN=NPEPL1 PE=1 SV=3	sp|B2I1U0|AMPA_ACIBC Probable cytosol aminopeptidase OS=Acinetobacter baumannii (strain ACICU) GN=pepA PE=3 SV=1	Cytoplasmic Protein	4	90.2
Acinetobacter	Proteobacteria	Acinetobacter baumannii	sp|Q8NDH3|PEPL1_HUMAN Probable aminopeptidase NPEPL1 OS=Homo sapiens GN=NPEPL1 PE=1 SV=3	sp|A3M1A8|AMPA_ACIBT Probable cytosol aminopeptidase OS=Acinetobacter baumannii (strain ATCC 17978 / CIP 53.77 / LMG 1025 / NCDC KC755 / 5377) GN=pepA PE=3 SV=2	Cytoplasmic Protein	1	53.1
Acinetobacter	Proteobacteria	Acinetobacter baumannii	sp|Q8NDH3|PEPL1_HUMAN Probable aminopeptidase NPEPL1 OS=Homo sapiens GN=NPEPL1 PE=1 SV=3	sp|B0VDC8|AMPA_ACIBY Probable cytosol aminopeptidase OS=Acinetobacter baumannii (strain AYE) GN=pepA PE=3 SV=1	Cytoplasmic Protein	4	90.2
Acinetobacter	Proteobacteria	Acinetobacter baumannii	sp|Q8NDH3|PEPL1_HUMAN Probable aminopeptidase NPEPL1 OS=Homo sapiens GN=NPEPL1 PE=1 SV=3	sp|B7I309|AMPA_ACIB5 Probable cytosol aminopeptidase OS=Acinetobacter baumannii (strain AB0057) GN=pepA PE=3 SV=1	Cytoplasmic Protein	4	90.2
Acinetobacter	Proteobacteria	Acinetobacter baumannii	sp|Q8NDH3|PEPL1_HUMAN Probable aminopeptidase NPEPL1 OS=Homo sapiens GN=NPEPL1 PE=1 SV=3	sp|B7H1P9|AMPA_ACIB3 Probable cytosol aminopeptidase OS=Acinetobacter baumannii (strain AB307-0294) GN=pepA PE=3 SV=1	Cytoplasmic Protein	1	53.1
Acinetobacter	Proteobacteria	Acinetobacter baylyi	sp|Q8NDH3|PEPL1_HUMAN Probable aminopeptidase NPEPL1 OS=Homo sapiens GN=NPEPL1 PE=1 SV=3	sp|Q6FFD8|AMPA_ACIAD Probable cytosol aminopeptidase OS=Acinetobacter baylyi (strain ATCC 33305 / BD413 / ADP1) GN=pepA PE=3 SV=1	Cytoplasmic Protein	4	90.2
Acinetobacter	Proteobacteria	Acinetobacter baumannii	sp|P07205|PGK2_HUMAN Phosphoglycerate kinase 2 OS=Homo sapiens GN=PGK2 PE=1 SV=3	sp|B2HZB6|PGK_ACIBC Phosphoglycerate kinase OS=Acinetobacter baumannii (strain ACICU) GN=pgk PE=3 SV=1	Cytoplasmic Protein	1	53.1
Acinetobacter	Proteobacteria	Acinetobacter baumannii	sp|P07205|PGK2_HUMAN Phosphoglycerate kinase 2 OS=Homo sapiens GN=PGK2 PE=1 SV=3	sp|B7I501|PGK_ACIB5 Phosphoglycerate kinase OS=Acinetobacter baumannii (strain AB0057) GN=pgk PE=3 SV=1	Cytoplasmic Protein	3	71.1
Acinetobacter	Proteobacteria	Acinetobacter baumannii	sp|P07205|PGK2_HUMAN Phosphoglycerate kinase 2 OS=Homo sapiens GN=PGK2 PE=1 SV=3	sp|B0VD03|PGK_ACIBY Phosphoglycerate kinase OS=Acinetobacter baumannii (strain AYE) GN=pgk PE=3 SV=1	Cytoplasmic Protein	4	90.2
Acinetobacter	Proteobacteria	Acinetobacter baumannii	sp|P07205|PGK2_HUMAN Phosphoglycerate kinase 2 OS=Homo sapiens GN=PGK2 PE=1 SV=3	sp|B7H3N8|PGK_ACIB3 Phosphoglycerate kinase OS=Acinetobacter baumannii (strain AB307-0294) GN=pgk PE=3 SV=1	Cytoplasmic Protein	4	90.2
Acinetobacter	Proteobacteria	Acinetobacter baumannii	sp|P07205|PGK2_HUMAN Phosphoglycerate kinase 2 OS=Homo sapiens GN=PGK2 PE=1 SV=3	sp|B0VMX3|PGK_ACIBS Phosphoglycerate kinase OS=Acinetobacter baumannii (strain SDF) GN=pgk PE=3 SV=1	Cytoplasmic Protein	1	53.1
Acinetobacter	Proteobacteria	Acinetobacter baumannii	sp|P07205|PGK2_HUMAN Phosphoglycerate kinase 2 OS=Homo sapiens GN=PGK2 PE=1 SV=3	sp|A3M4X6|PGK_ACIBT Phosphoglycerate kinase OS=Acinetobacter baumannii (strain ATCC 17978 / CIP 53.77 / LMG 1025 / NCDC KC755 / 5377) GN=pgk PE=3 SV=2	Cytoplasmic Protein	4	90.2
Acinetobacter	Proteobacteria	Acinetobacter baylyi	sp|P07205|PGK2_HUMAN Phosphoglycerate kinase 2 OS=Homo sapiens GN=PGK2 PE=1 SV=3	sp|Q6FB08|PGK_ACIAD Phosphoglycerate kinase OS=Acinetobacter baylyi (strain ATCC 33305 / BD413 / ADP1) GN=pgk PE=3 SV=1	Cytoplasmic Protein	4	90.2
Acinetobacter	Proteobacteria	Acinetobacter baylyi	sp|P15428|PGDH_HUMAN 15-hydroxyprostaglandin dehydrogenase [NAD(+)] OS=Homo sapiens GN=HPGD PE=1 SV=1	sp|P07772|BEND_ACIAD 1,6-dihydroxycyclohexa-2,4-diene-1-carboxylate dehydrogenase OS=Acinetobacter baylyi (strain ATCC 33305 / BD413 / ADP1) GN=benD PE=3 SV=2	Cytoplasmic Protein	4	90.2
Acinetobacter	Proteobacteria	Acinetobacter baylyi	sp|Q9UBT6|POLK_HUMAN DNA polymerase kappa OS=Homo sapiens GN=POLK PE=1 SV=1	sp|Q6FFG4|DPO4_ACIAD DNA polymerase IV OS=Acinetobacter baylyi (strain ATCC 33305 / BD413 / ADP1) GN=dinB PE=3 SV=1	Cytoplasmic Protein	4	90.2
Acinetobacter	Proteobacteria	Acinetobacter baumannii	sp|P22102|PUR2_HUMAN Trifunctional purine biosynthetic protein adenosine-3 OS=Homo sapiens GN=GART PE=1 SV=1	sp|B0VT70|PUR5_ACIBS Phosphoribosylformylglycinamidine cyclo-ligase OS=Acinetobacter baumannii (strain SDF) GN=purM PE=3 SV=1	Cytoplasmic Protein	1	53.1
Acinetobacter	Proteobacteria	Acinetobacter baumannii	sp|P22102|PUR2_HUMAN Trifunctional purine biosynthetic protein adenosine-3 OS=Homo sapiens GN=GART PE=1 SV=1	sp|B2HWV2|PUR5_ACIBC Phosphoribosylformylglycinamidine cyclo-ligase OS=Acinetobacter baumannii (strain ACICU) GN=purM PE=3 SV=1	Cytoplasmic Protein	5	98.1
Acinetobacter	Proteobacteria	Acinetobacter baumannii	sp|P22102|PUR2_HUMAN Trifunctional purine biosynthetic protein adenosine-3 OS=Homo sapiens GN=GART PE=1 SV=1	sp|A3M7X8|PUR5_ACIBT Phosphoribosylformylglycinamidine cyclo-ligase OS=Acinetobacter baumannii (strain ATCC 17978 / CIP 53.77 / LMG 1025 / NCDC KC755 / 5377) GN=purM PE=3 SV=2	Cytoplasmic Protein	4	90.2
Acinetobacter	Proteobacteria	Acinetobacter baumannii	sp|P22102|PUR2_HUMAN Trifunctional purine biosynthetic protein adenosine-3 OS=Homo sapiens GN=GART PE=1 SV=1	sp|B0VDJ1|PUR5_ACIBY Phosphoribosylformylglycinamidine cyclo-ligase OS=Acinetobacter baumannii (strain AYE) GN=purM PE=3 SV=1	Cytoplasmic Protein	1	53.1
Acinetobacter	Proteobacteria	Acinetobacter baumannii	sp|P22102|PUR2_HUMAN Trifunctional purine biosynthetic protein adenosine-3 OS=Homo sapiens GN=GART PE=1 SV=1	sp|B7GY98|PUR5_ACIB3 Phosphoribosylformylglycinamidine cyclo-ligase OS=Acinetobacter baumannii (strain AB307-0294) GN=purM PE=3 SV=1	Cytoplasmic Protein	4	90.2
Acinetobacter	Proteobacteria	Acinetobacter baumannii	sp|P22102|PUR2_HUMAN Trifunctional purine biosynthetic protein adenosine-3 OS=Homo sapiens GN=GART PE=1 SV=1	sp|B7I5C6|PUR5_ACIB5 Phosphoribosylformylglycinamidine cyclo-ligase OS=Acinetobacter baumannii (strain AB0057) GN=purM PE=3 SV=1	Cytoplasmic Protein	4	90.2
Acinetobacter	Proteobacteria	Acinetobacter baylyi	sp|P22102|PUR2_HUMAN Trifunctional purine biosynthetic protein adenosine-3 OS=Homo sapiens GN=GART PE=1 SV=1	sp|Q6F973|PUR5_ACIAD Phosphoribosylformylglycinamidine cyclo-ligase OS=Acinetobacter baylyi (strain ATCC 33305 / BD413 / ADP1) GN=purM PE=3 SV=1	Cytoplasmic Protein	1	53.1
Acinetobacter	Proteobacteria	Acinetobacter baylyi	sp|P27708|PYR1_HUMAN CAD protein OS=Homo sapiens GN=CAD PE=1 SV=3	sp|Q6F8M7|CARA_ACIAD Carbamoyl-phosphate synthase small chain OS=Acinetobacter baylyi (strain ATCC 33305 / BD413 / ADP1) GN=carA PE=3 SV=1	Cytoplasmic Protein	4	90.2
Acinetobacter	Proteobacteria	Acinetobacter baylyi	sp|Q02127|PYRD_HUMAN Dihydroorotate dehydrogenase (quinone), mitochondrial OS=Homo sapiens GN=DHODH PE=1 SV=3	sp|Q6FCL9|PYRD_ACIAD Dihydroorotate dehydrogenase (quinone) OS=Acinetobacter baylyi (strain ATCC 33305 / BD413 / ADP1) GN=pyrD PE=3 SV=1	Cytoplasmic Protein	4	90.2
Acinetobacter	Proteobacteria	Acinetobacter baumannii	sp|Q02127|PYRD_HUMAN Dihydroorotate dehydrogenase (quinone), mitochondrial OS=Homo sapiens GN=DHODH PE=1 SV=3	sp|B7GZW7|PYRD_ACIB3 Dihydroorotate dehydrogenase (quinone) OS=Acinetobacter baumannii (strain AB307-0294) GN=pyrD PE=3 SV=1	Cytoplasmic Protein	1	53.1
Acinetobacter	Proteobacteria	Acinetobacter baumannii	sp|Q02127|PYRD_HUMAN Dihydroorotate dehydrogenase (quinone), mitochondrial OS=Homo sapiens GN=DHODH PE=1 SV=3	sp|A3M6Y2|PYRD_ACIBT Dihydroorotate dehydrogenase (quinone) OS=Acinetobacter baumannii (strain ATCC 17978 / CIP 53.77 / LMG 1025 / NCDC KC755 / 5377) GN=pyrD PE=3 SV=2	Cytoplasmic Protein	4	90.2
Acinetobacter	Proteobacteria	Acinetobacter baumannii	sp|Q02127|PYRD_HUMAN Dihydroorotate dehydrogenase (quinone), mitochondrial OS=Homo sapiens GN=DHODH PE=1 SV=3	sp|B7I2L5|PYRD_ACIB5 Dihydroorotate dehydrogenase (quinone) OS=Acinetobacter baumannii (strain AB0057) GN=pyrD PE=3 SV=1	Cytoplasmic Protein	4	90.2
Acinetobacter	Proteobacteria	Acinetobacter baumannii	sp|Q02127|PYRD_HUMAN Dihydroorotate dehydrogenase (quinone), mitochondrial OS=Homo sapiens GN=DHODH PE=1 SV=3	sp|B2HUT6|PYRD_ACIBC Dihydroorotate dehydrogenase (quinone) OS=Acinetobacter baumannii (strain ACICU) GN=pyrD PE=3 SV=1	Cytoplasmic Protein	1	53.1
Acinetobacter	Proteobacteria	Acinetobacter baumannii	sp|Q02127|PYRD_HUMAN Dihydroorotate dehydrogenase (quinone), mitochondrial OS=Homo sapiens GN=DHODH PE=1 SV=3	sp|B0V824|PYRD_ACIBY Dihydroorotate dehydrogenase (quinone) OS=Acinetobacter baumannii (strain AYE) GN=pyrD PE=3 SV=1	Cytoplasmic Protein	1	53.1
Acinetobacter	Proteobacteria	Acinetobacter baumannii	sp|Q02127|PYRD_HUMAN Dihydroorotate dehydrogenase (quinone), mitochondrial OS=Homo sapiens GN=DHODH PE=1 SV=3	sp|B0VKB8|PYRD_ACIBS Dihydroorotate dehydrogenase (quinone) OS=Acinetobacter baumannii (strain SDF) GN=pyrD PE=3 SV=1	Cytoplasmic Protein	4	90.2
Acinetobacter	Proteobacteria	Acinetobacter baumannii	sp|Q9UGC7|RF1ML_HUMAN Peptide chain release factor 1-like, mitochondrial OS=Homo sapiens GN=MTRF1L PE=1 SV=1	sp|B2HU82|RF1_ACIBC Peptide chain release factor 1 OS=Acinetobacter baumannii (strain ACICU) GN=prfA PE=3 SV=1	Cytoplasmic Protein	1	53.1
Acinetobacter	Proteobacteria	Acinetobacter baumannii	sp|Q9UGC7|RF1ML_HUMAN Peptide chain release factor 1-like, mitochondrial OS=Homo sapiens GN=MTRF1L PE=1 SV=1	sp|A3M6N7|RF1_ACIBT Peptide chain release factor 1 OS=Acinetobacter baumannii (strain ATCC 17978 / CIP 53.77 / LMG 1025 / NCDC KC755 / 5377) GN=prfA PE=3 SV=2	Cytoplasmic Protein	4	90.2
Acinetobacter	Proteobacteria	Acinetobacter baumannii	sp|Q9UGC7|RF1ML_HUMAN Peptide chain release factor 1-like, mitochondrial OS=Homo sapiens GN=MTRF1L PE=1 SV=1	sp|B0VM26|RF1_ACIBS Peptide chain release factor 1 OS=Acinetobacter baumannii (strain SDF) GN=prfA PE=3 SV=1	Cytoplasmic Protein	4	90.2
Acinetobacter	Proteobacteria	Acinetobacter baumannii	sp|Q9UGC7|RF1ML_HUMAN Peptide chain release factor 1-like, mitochondrial OS=Homo sapiens GN=MTRF1L PE=1 SV=1	sp|B0V7E0|RF1_ACIBY Peptide chain release factor 1 OS=Acinetobacter baumannii (strain AYE) GN=prfA PE=3 SV=1	Cytoplasmic Protein	4	90.2
Acinetobacter	Proteobacteria	Acinetobacter baumannii	sp|Q9UGC7|RF1ML_HUMAN Peptide chain release factor 1-like, mitochondrial OS=Homo sapiens GN=MTRF1L PE=1 SV=1	sp|B7IBA1|RF1_ACIB5 Peptide chain release factor 1 OS=Acinetobacter baumannii (strain AB0057) GN=prfA PE=3 SV=1	Cytoplasmic Protein	4	90.2
Acinetobacter	Proteobacteria	Acinetobacter baumannii	sp|Q9UGC7|RF1ML_HUMAN Peptide chain release factor 1-like, mitochondrial OS=Homo sapiens GN=MTRF1L PE=1 SV=1	sp|B7H0L9|RF1_ACIB3 Peptide chain release factor 1 OS=Acinetobacter baumannii (strain AB307-0294) GN=prfA PE=3 SV=1	Cytoplasmic Protein	4	90.2
Acinetobacter	Proteobacteria	Acinetobacter baylyi	sp|Q9UGC7|RF1ML_HUMAN Peptide chain release factor 1-like, mitochondrial OS=Homo sapiens GN=MTRF1L PE=1 SV=1	sp|Q6F9S2|RF1_ACIAD Peptide chain release factor 1 OS=Acinetobacter baylyi (strain ATCC 33305 / BD413 / ADP1) GN=prfA PE=3 SV=2	Cytoplasmic Protein	4	90.2
Acinetobacter	Proteobacteria	Acinetobacter baylyi	sp|O75792|RNH2A_HUMAN Ribonuclease H2 subunit A OS=Homo sapiens GN=RNASEH2A PE=1 SV=2	sp|Q6FCT7|RNH2_ACIAD Ribonuclease HII OS=Acinetobacter baylyi (strain ATCC 33305 / BD413 / ADP1) GN=rnhB PE=3 SV=1	Cytoplasmic Protein	1	53.1
Acinetobacter	Proteobacteria	Acinetobacter baylyi	sp|P23526|SAHH_HUMAN Adenosylhomocysteinase OS=Homo sapiens GN=AHCY PE=1 SV=4	sp|Q6FA43|SAHH_ACIAD Adenosylhomocysteinase OS=Acinetobacter baylyi (strain ATCC 33305 / BD413 / ADP1) GN=ahcY PE=3 SV=1	Cytoplasmic Protein	4	90.2
Acinetobacter	Proteobacteria	Acinetobacter baumannii	sp|P82912|RT11_HUMAN 28S ribosomal protein S11, mitochondrial OS=Homo sapiens GN=MRPS11 PE=1 SV=2	sp|B2HZ85|RS11_ACIBC 30S ribosomal protein S11 OS=Acinetobacter baumannii (strain ACICU) GN=rpsK PE=3 SV=1	Cytoplasmic Protein	4	90.2
Acinetobacter	Proteobacteria	Acinetobacter baumannii	sp|P82912|RT11_HUMAN 28S ribosomal protein S11, mitochondrial OS=Homo sapiens GN=MRPS11 PE=1 SV=2	sp|B0V6U5|RS11_ACIBY 30S ribosomal protein S11 OS=Acinetobacter baumannii (strain AYE) GN=rpsK PE=3 SV=1	Periplasmic Protein	1	53.1
Acinetobacter	Proteobacteria	Acinetobacter baumannii	sp|P82912|RT11_HUMAN 28S ribosomal protein S11, mitochondrial OS=Homo sapiens GN=MRPS11 PE=1 SV=2	sp|B0VQU1|RS11_ACIBS 30S ribosomal protein S11 OS=Acinetobacter baumannii (strain SDF) GN=rpsK PE=3 SV=1	Cytoplasmic Protein	4	90.2
Acinetobacter	Proteobacteria	Acinetobacter baumannii	sp|P82912|RT11_HUMAN 28S ribosomal protein S11, mitochondrial OS=Homo sapiens GN=MRPS11 PE=1 SV=2	sp|B7IA16|RS11_ACIB5 30S ribosomal protein S11 OS=Acinetobacter baumannii (strain AB0057) GN=rpsK PE=3 SV=1	Cytoplasmic Protein	4	90.2
Acinetobacter	Proteobacteria	Acinetobacter baumannii	sp|P82912|RT11_HUMAN 28S ribosomal protein S11, mitochondrial OS=Homo sapiens GN=MRPS11 PE=1 SV=2	sp|A3M961|RS11_ACIBT 30S ribosomal protein S11 OS=Acinetobacter baumannii (strain ATCC 17978 / CIP 53.77 / LMG 1025 / NCDC KC755 / 5377) GN=rpsK PE=3 SV=2	Cytoplasmic Protein	4	90.2
Acinetobacter	Proteobacteria	Acinetobacter baumannii	sp|P82912|RT11_HUMAN 28S ribosomal protein S11, mitochondrial OS=Homo sapiens GN=MRPS11 PE=1 SV=2	sp|B7GW25|RS11_ACIB3 30S ribosomal protein S11 OS=Acinetobacter baumannii (strain AB307-0294) GN=rpsK PE=3 SV=1	Cytoplasmic Protein	4	90.2
Acinetobacter	Proteobacteria	Acinetobacter baylyi	sp|P82912|RT11_HUMAN 28S ribosomal protein S11, mitochondrial OS=Homo sapiens GN=MRPS11 PE=1 SV=2	sp|Q6F7T5|RS11_ACIAD 30S ribosomal protein S11 OS=Acinetobacter baylyi (strain ATCC 33305 / BD413 / ADP1) GN=rpsK PE=3 SV=1	Periplasmic Protein	1	53.1
Acinetobacter	Proteobacteria	Acinetobacter baylyi	sp|P04179|SODM_HUMAN Superoxide dismutase [Mn], mitochondrial OS=Homo sapiens GN=SOD2 PE=1 SV=2	sp|Q59094|SODM_ACIAD Superoxide dismutase [Mn] OS=Acinetobacter baylyi (strain ATCC 33305 / BD413 / ADP1) GN=sodA PE=3 SV=1	Cytoplasmic Protein	4	90.2
Acinetobacter	Proteobacteria	Acinetobacter baylyi	sp|Q96I99|SUCB2_HUMAN Succinyl-CoA ligase [GDP-forming] subunit beta, mitochondrial OS=Homo sapiens GN=SUCLG2 PE=1 SV=2	sp|Q6F8L4|SUCC_ACIAD Succinyl-CoA ligase [ADP-forming] subunit beta OS=Acinetobacter baylyi (strain ATCC 33305 / BD413 / ADP1) GN=sucC PE=3 SV=1	Cytoplasmic Protein	1	53.1
Acinetobacter	Proteobacteria	Acinetobacter baumannii	sp|Q96I99|SUCB2_HUMAN Succinyl-CoA ligase [GDP-forming] subunit beta, mitochondrial OS=Homo sapiens GN=SUCLG2 PE=1 SV=2	sp|B0VEF2|SUCC_ACIBY Succinyl-CoA ligase [ADP-forming] subunit beta OS=Acinetobacter baumannii (strain AYE) GN=sucC PE=3 SV=1	Cytoplasmic Protein	1	53.1
Acinetobacter	Proteobacteria	Acinetobacter baumannii	sp|Q96I99|SUCB2_HUMAN Succinyl-CoA ligase [GDP-forming] subunit beta, mitochondrial OS=Homo sapiens GN=SUCLG2 PE=1 SV=2	sp|A3M887|SUCC_ACIBT Succinyl-CoA ligase [ADP-forming] subunit beta OS=Acinetobacter baumannii (strain ATCC 17978 / CIP 53.77 / LMG 1025 / NCDC KC755 / 5377) GN=sucC PE=3 SV=2	Cytoplasmic Protein	4	90.2
Acinetobacter	Proteobacteria	Acinetobacter baumannii	sp|Q96I99|SUCB2_HUMAN Succinyl-CoA ligase [GDP-forming] subunit beta, mitochondrial OS=Homo sapiens GN=SUCLG2 PE=1 SV=2	sp|B7I6T2|SUCC_ACIB5 Succinyl-CoA ligase [ADP-forming] subunit beta OS=Acinetobacter baumannii (strain AB0057) GN=sucC PE=3 SV=1	Cytoplasmic Protein	4	90.2
Acinetobacter	Proteobacteria	Acinetobacter baumannii	sp|Q96I99|SUCB2_HUMAN Succinyl-CoA ligase [GDP-forming] subunit beta, mitochondrial OS=Homo sapiens GN=SUCLG2 PE=1 SV=2	sp|B2HXG0|SUCC_ACIBC Succinyl-CoA ligase [ADP-forming] subunit beta OS=Acinetobacter baumannii (strain ACICU) GN=sucC PE=3 SV=1	Cytoplasmic Protein	4	90.2
Acinetobacter	Proteobacteria	Acinetobacter baumannii	sp|Q96I99|SUCB2_HUMAN Succinyl-CoA ligase [GDP-forming] subunit beta, mitochondrial OS=Homo sapiens GN=SUCLG2 PE=1 SV=2	sp|B7GXK7|SUCC_ACIB3 Succinyl-CoA ligase [ADP-forming] subunit beta OS=Acinetobacter baumannii (strain AB307-0294) GN=sucC PE=3 SV=1	Cytoplasmic Protein	1	53.1
Acinetobacter	Proteobacteria	Acinetobacter baumannii	sp|Q96I99|SUCB2_HUMAN Succinyl-CoA ligase [GDP-forming] subunit beta, mitochondrial OS=Homo sapiens GN=SUCLG2 PE=1 SV=2	sp|B0VSL0|SUCC_ACIBS Succinyl-CoA ligase [ADP-forming] subunit beta OS=Acinetobacter baumannii (strain SDF) GN=sucC PE=3 SV=1	Cytoplasmic Protein	4	90.2
Acinetobacter	Proteobacteria	Acinetobacter baumannii	sp|P49588|SYAC_HUMAN Alanine--tRNA ligase, cytoplasmic OS=Homo sapiens GN=AARS PE=1 SV=2	sp|B0VAI3|SYA_ACIBY Alanine--tRNA ligase OS=Acinetobacter baumannii (strain AYE) GN=alaS PE=3 SV=1	Cytoplasmic Protein	4	90.2
Acinetobacter	Proteobacteria	Acinetobacter baumannii	sp|P49588|SYAC_HUMAN Alanine--tRNA ligase, cytoplasmic OS=Homo sapiens GN=AARS PE=1 SV=2	sp|A3M3W2|SYA_ACIBT Alanine--tRNA ligase OS=Acinetobacter baumannii (strain ATCC 17978 / CIP 53.77 / LMG 1025 / NCDC KC755 / 5377) GN=alaS PE=3 SV=2	Cytoplasmic Protein	4	90.2
Acinetobacter	Proteobacteria	Acinetobacter baumannii	sp|P49588|SYAC_HUMAN Alanine--tRNA ligase, cytoplasmic OS=Homo sapiens GN=AARS PE=1 SV=2	sp|B2HWK7|SYA_ACIBC Alanine--tRNA ligase OS=Acinetobacter baumannii (strain ACICU) GN=alaS PE=3 SV=2	Cytoplasmic Protein	4	90.2
Acinetobacter	Proteobacteria	Acinetobacter baylyi	sp|P49588|SYAC_HUMAN Alanine--tRNA ligase, cytoplasmic OS=Homo sapiens GN=AARS PE=1 SV=2	sp|Q6FCT2|SYA_ACIAD Alanine--tRNA ligase OS=Acinetobacter baylyi (strain ATCC 33305 / BD413 / ADP1) GN=alaS PE=3 SV=1	Cytoplasmic Protein	4	90.2
Acinetobacter	Proteobacteria	Acinetobacter baumannii	sp|Q6PI48|SYDM_HUMAN Aspartate--tRNA ligase, mitochondrial OS=Homo sapiens GN=DARS2 PE=1 SV=1	sp|B0V550|SYDND_ACIBY Aspartate--tRNA(Asp/Asn) ligase OS=Acinetobacter baumannii (strain AYE) GN=aspS PE=3 SV=1	Cytoplasmic Protein	1	53.1
Acinetobacter	Proteobacteria	Acinetobacter baumannii	sp|Q6PI48|SYDM_HUMAN Aspartate--tRNA ligase, mitochondrial OS=Homo sapiens GN=DARS2 PE=1 SV=1	sp|B2HYL7|SYDND_ACIBC Aspartate--tRNA(Asp/Asn) ligase OS=Acinetobacter baumannii (strain ACICU) GN=aspS PE=3 SV=1	Cytoplasmic Protein	4	90.2
Acinetobacter	Proteobacteria	Acinetobacter baumannii	sp|Q6PI48|SYDM_HUMAN Aspartate--tRNA ligase, mitochondrial OS=Homo sapiens GN=DARS2 PE=1 SV=1	sp|B7I8M5|SYDND_ACIB5 Aspartate--tRNA(Asp/Asn) ligase OS=Acinetobacter baumannii (strain AB0057) GN=aspS PE=3 SV=1	Cytoplasmic Protein	1	53.1
Acinetobacter	Proteobacteria	Acinetobacter baumannii	sp|Q6PI48|SYDM_HUMAN Aspartate--tRNA ligase, mitochondrial OS=Homo sapiens GN=DARS2 PE=1 SV=1	sp|B7GWN1|SYDND_ACIB3 Aspartate--tRNA(Asp/Asn) ligase OS=Acinetobacter baumannii (strain AB307-0294) GN=aspS PE=3 SV=1	Cytoplasmic Protein	1	53.1
Acinetobacter	Proteobacteria	Acinetobacter baumannii	sp|Q6PI48|SYDM_HUMAN Aspartate--tRNA ligase, mitochondrial OS=Homo sapiens GN=DARS2 PE=1 SV=1	sp|A3M8Q6|SYDND_ACIBT Aspartate--tRNA(Asp/Asn) ligase OS=Acinetobacter baumannii (strain ATCC 17978 / CIP 53.77 / LMG 1025 / NCDC KC755 / 5377) GN=aspS PE=3 SV=2	Cytoplasmic Protein	4	90.2
Acinetobacter	Proteobacteria	Acinetobacter baumannii	sp|Q6PI48|SYDM_HUMAN Aspartate--tRNA ligase, mitochondrial OS=Homo sapiens GN=DARS2 PE=1 SV=1	sp|B0VRC7|SYDND_ACIBS Aspartate--tRNA(Asp/Asn) ligase OS=Acinetobacter baumannii (strain SDF) GN=aspS PE=3 SV=1	Cytoplasmic Protein	4	90.2
Acinetobacter	Proteobacteria	Acinetobacter baumannii	sp|P49589|SYCC_HUMAN Cysteine--tRNA ligase, cytoplasmic OS=Homo sapiens GN=CARS PE=1 SV=3	sp|B0VS71|SYC_ACIBS Cysteine--tRNA ligase OS=Acinetobacter baumannii (strain SDF) GN=cysS PE=3 SV=1	Cytoplasmic Protein	4	90.2
Acinetobacter	Proteobacteria	Acinetobacter baumannii	sp|P49589|SYCC_HUMAN Cysteine--tRNA ligase, cytoplasmic OS=Homo sapiens GN=CARS PE=1 SV=3	sp|B0VAU1|SYC_ACIBY Cysteine--tRNA ligase OS=Acinetobacter baumannii (strain AYE) GN=cysS PE=3 SV=1	Cytoplasmic Protein	4	90.2
Acinetobacter	Proteobacteria	Acinetobacter baumannii	sp|P49589|SYCC_HUMAN Cysteine--tRNA ligase, cytoplasmic OS=Homo sapiens GN=CARS PE=1 SV=3	sp|B7GWA1|SYC_ACIB3 Cysteine--tRNA ligase OS=Acinetobacter baumannii (strain AB307-0294) GN=cysS PE=3 SV=1	Cytoplasmic Protein	1	53.1
Acinetobacter	Proteobacteria	Acinetobacter baumannii	sp|P49589|SYCC_HUMAN Cysteine--tRNA ligase, cytoplasmic OS=Homo sapiens GN=CARS PE=1 SV=3	sp|B7IBU3|SYC_ACIB5 Cysteine--tRNA ligase OS=Acinetobacter baumannii (strain AB0057) GN=cysS PE=3 SV=1	Cytoplasmic Protein	4	90.2
Acinetobacter	Proteobacteria	Acinetobacter baumannii	sp|P49589|SYCC_HUMAN Cysteine--tRNA ligase, cytoplasmic OS=Homo sapiens GN=CARS PE=1 SV=3	sp|B2HX34|SYC_ACIBC Cysteine--tRNA ligase OS=Acinetobacter baumannii (strain ACICU) GN=cysS PE=3 SV=1	Cytoplasmic Protein	4	90.2
Acinetobacter	Proteobacteria	Acinetobacter baumannii	sp|P49589|SYCC_HUMAN Cysteine--tRNA ligase, cytoplasmic OS=Homo sapiens GN=CARS PE=1 SV=3	sp|A3M419|SYC_ACIBT Cysteine--tRNA ligase OS=Acinetobacter baumannii (strain ATCC 17978 / CIP 53.77 / LMG 1025 / NCDC KC755 / 5377) GN=cysS PE=3 SV=2	Cytoplasmic Protein	1	53.1
Acinetobacter	Proteobacteria	Acinetobacter baylyi	sp|P49589|SYCC_HUMAN Cysteine--tRNA ligase, cytoplasmic OS=Homo sapiens GN=CARS PE=1 SV=3	sp|Q6FC71|SYC_ACIAD Cysteine--tRNA ligase OS=Acinetobacter baylyi (strain ATCC 33305 / BD413 / ADP1) GN=cysS PE=3 SV=1	Cytoplasmic Protein	4	90.2
Acinetobacter	Proteobacteria	Acinetobacter baumannii	sp|P12081|SYHC_HUMAN Histidine--tRNA ligase, cytoplasmic OS=Homo sapiens GN=HARS PE=1 SV=2	sp|B7I5G8|SYH_ACIB5 Histidine--tRNA ligase OS=Acinetobacter baumannii (strain AB0057) GN=hisS PE=3 SV=1	Cytoplasmic Protein	4	90.2
Acinetobacter	Proteobacteria	Acinetobacter baumannii	sp|P12081|SYHC_HUMAN Histidine--tRNA ligase, cytoplasmic OS=Homo sapiens GN=HARS PE=1 SV=2	sp|B0VKR7|SYH_ACIBS Histidine--tRNA ligase OS=Acinetobacter baumannii (strain SDF) GN=hisS PE=3 SV=1	Cytoplasmic Protein	4	90.2
Acinetobacter	Proteobacteria	Acinetobacter baumannii	sp|P12081|SYHC_HUMAN Histidine--tRNA ligase, cytoplasmic OS=Homo sapiens GN=HARS PE=1 SV=2	sp|B7H068|SYH_ACIB3 Histidine--tRNA ligase OS=Acinetobacter baumannii (strain AB307-0294) GN=hisS PE=3 SV=1	Cytoplasmic Protein	4	90.2
Acinetobacter	Proteobacteria	Acinetobacter baumannii	sp|P12081|SYHC_HUMAN Histidine--tRNA ligase, cytoplasmic OS=Homo sapiens GN=HARS PE=1 SV=2	sp|B0V5G6|SYH_ACIBY Histidine--tRNA ligase OS=Acinetobacter baumannii (strain AYE) GN=hisS PE=3 SV=1	Cytoplasmic Protein	4	90.2
Acinetobacter	Proteobacteria	Acinetobacter baylyi	sp|P12081|SYHC_HUMAN Histidine--tRNA ligase, cytoplasmic OS=Homo sapiens GN=HARS PE=1 SV=2	sp|Q6FEM2|SYH_ACIAD Histidine--tRNA ligase OS=Acinetobacter baylyi (strain ATCC 33305 / BD413 / ADP1) GN=hisS PE=3 SV=1	Cytoplasmic Protein	4	90.2
Acinetobacter	Proteobacteria	Acinetobacter baumannii	sp|P12081|SYHC_HUMAN Histidine--tRNA ligase, cytoplasmic OS=Homo sapiens GN=HARS PE=1 SV=2	sp|A3M212|SYH_ACIBT Histidine--tRNA ligase OS=Acinetobacter baumannii (strain ATCC 17978 / CIP 53.77 / LMG 1025 / NCDC KC755 / 5377) GN=hisS PE=3 SV=2	Cytoplasmic Protein	1	53.1
Acinetobacter	Proteobacteria	Acinetobacter baumannii	sp|P12081|SYHC_HUMAN Histidine--tRNA ligase, cytoplasmic OS=Homo sapiens GN=HARS PE=1 SV=2	sp|B2I3E6|SYH_ACIBC Histidine--tRNA ligase OS=Acinetobacter baumannii (strain ACICU) GN=hisS PE=3 SV=1	Cytoplasmic Protein	1	53.1
Acinetobacter	Proteobacteria	Acinetobacter baumannii	sp|Q15046|SYK_HUMAN Lysine--tRNA ligase OS=Homo sapiens GN=KARS PE=1 SV=3	sp|B0VSE0|SYK_ACIBS Lysine--tRNA ligase OS=Acinetobacter baumannii (strain SDF) GN=lysS PE=3 SV=1	Cytoplasmic Protein	4	90.2
Acinetobacter	Proteobacteria	Acinetobacter baumannii	sp|Q15046|SYK_HUMAN Lysine--tRNA ligase OS=Homo sapiens GN=KARS PE=1 SV=3	sp|B0V9L5|SYK_ACIBY Lysine--tRNA ligase OS=Acinetobacter baumannii (strain AYE) GN=lysS PE=3 SV=1	Cytoplasmic Protein	4	90.2
Acinetobacter	Proteobacteria	Acinetobacter baumannii	sp|Q15046|SYK_HUMAN Lysine--tRNA ligase OS=Homo sapiens GN=KARS PE=1 SV=3	sp|B7GXW0|SYK_ACIB3 Lysine--tRNA ligase OS=Acinetobacter baumannii (strain AB307-0294) GN=lysS PE=3 SV=1	Cytoplasmic Protein	1	53.1
Acinetobacter	Proteobacteria	Acinetobacter baumannii	sp|Q15046|SYK_HUMAN Lysine--tRNA ligase OS=Homo sapiens GN=KARS PE=1 SV=3	sp|A3M3D6|SYK_ACIBT Lysine--tRNA ligase OS=Acinetobacter baumannii (strain ATCC 17978 / CIP 53.77 / LMG 1025 / NCDC KC755 / 5377) GN=lysS PE=3 SV=2	Cytoplasmic Protein	4	90.2
Acinetobacter	Proteobacteria	Acinetobacter baylyi	sp|Q15046|SYK_HUMAN Lysine--tRNA ligase OS=Homo sapiens GN=KARS PE=1 SV=3	sp|Q43990|SYK_ACIAD Lysine--tRNA ligase OS=Acinetobacter baylyi (strain ATCC 33305 / BD413 / ADP1) GN=lysS PE=3 SV=1	Cytoplasmic Protein	4	90.2
Acinetobacter	Proteobacteria	Acinetobacter baylyi	sp|Q15031|SYLM_HUMAN Probable leucine--tRNA ligase, mitochondrial OS=Homo sapiens GN=LARS2 PE=1 SV=2	sp|Q6F817|SYL_ACIAD Leucine--tRNA ligase OS=Acinetobacter baylyi (strain ATCC 33305 / BD413 / ADP1) GN=leuS PE=3 SV=1	Cytoplasmic Protein	4	90.2
Acinetobacter	Proteobacteria	Acinetobacter baumannii	sp|Q15031|SYLM_HUMAN Probable leucine--tRNA ligase, mitochondrial OS=Homo sapiens GN=LARS2 PE=1 SV=2	sp|B0VKP9|SYL_ACIBS Leucine--tRNA ligase OS=Acinetobacter baumannii (strain SDF) GN=leuS PE=3 SV=1	Cytoplasmic Protein	4	90.2
Acinetobacter	Proteobacteria	Acinetobacter baumannii	sp|Q15031|SYLM_HUMAN Probable leucine--tRNA ligase, mitochondrial OS=Homo sapiens GN=LARS2 PE=1 SV=2	sp|B0V5H2|SYL_ACIBY Leucine--tRNA ligase OS=Acinetobacter baumannii (strain AYE) GN=leuS PE=3 SV=1	Cytoplasmic Protein	4	90.2
Acinetobacter	Proteobacteria	Acinetobacter baumannii	sp|Q15031|SYLM_HUMAN Probable leucine--tRNA ligase, mitochondrial OS=Homo sapiens GN=LARS2 PE=1 SV=2	sp|B2HTC4|SYL_ACIBC Leucine--tRNA ligase OS=Acinetobacter baumannii (strain ACICU) GN=leuS PE=3 SV=1	Cytoplasmic Protein	4	90.2
Acinetobacter	Proteobacteria	Acinetobacter baumannii	sp|Q15031|SYLM_HUMAN Probable leucine--tRNA ligase, mitochondrial OS=Homo sapiens GN=LARS2 PE=1 SV=2	sp|B7I5I5|SYL_ACIB5 Leucine--tRNA ligase OS=Acinetobacter baumannii (strain AB0057) GN=leuS PE=3 SV=1	Cytoplasmic Protein	1	53.1
Acinetobacter	Proteobacteria	Acinetobacter baumannii	sp|Q15031|SYLM_HUMAN Probable leucine--tRNA ligase, mitochondrial OS=Homo sapiens GN=LARS2 PE=1 SV=2	sp|B7H051|SYL_ACIB3 Leucine--tRNA ligase OS=Acinetobacter baumannii (strain AB307-0294) GN=leuS PE=3 SV=1	Cytoplasmic Protein	4	90.2
Acinetobacter	Proteobacteria	Acinetobacter baumannii	sp|A2RTX5|SYTC2_HUMAN Probable threonine--tRNA ligase 2, cytoplasmic OS=Homo sapiens GN=TARSL2 PE=1 SV=1	sp|B2HTH0|SYT_ACIBC Threonine--tRNA ligase OS=Acinetobacter baumannii (strain ACICU) GN=thrS PE=3 SV=1	Cytoplasmic Protein	4	90.2
Acinetobacter	Proteobacteria	Acinetobacter baumannii	sp|A2RTX5|SYTC2_HUMAN Probable threonine--tRNA ligase 2, cytoplasmic OS=Homo sapiens GN=TARSL2 PE=1 SV=1	sp|B7H005|SYT_ACIB3 Threonine--tRNA ligase OS=Acinetobacter baumannii (strain AB307-0294) GN=thrS PE=3 SV=1	Cytoplasmic Protein	4	90.2
Acinetobacter	Proteobacteria	Acinetobacter baumannii	sp|A2RTX5|SYTC2_HUMAN Probable threonine--tRNA ligase 2, cytoplasmic OS=Homo sapiens GN=TARSL2 PE=1 SV=1	sp|B0V5P2|SYT_ACIBY Threonine--tRNA ligase OS=Acinetobacter baumannii (strain AYE) GN=thrS PE=3 SV=1	Cytoplasmic Protein	4	90.2
Acinetobacter	Proteobacteria	Acinetobacter baumannii	sp|A2RTX5|SYTC2_HUMAN Probable threonine--tRNA ligase 2, cytoplasmic OS=Homo sapiens GN=TARSL2 PE=1 SV=1	sp|A3M299|SYT_ACIBT Threonine--tRNA ligase OS=Acinetobacter baumannii (strain ATCC 17978 / CIP 53.77 / LMG 1025 / NCDC KC755 / 5377) GN=thrS PE=3 SV=2	Cytoplasmic Protein	1	53.1
Acinetobacter	Proteobacteria	Acinetobacter baumannii	sp|A2RTX5|SYTC2_HUMAN Probable threonine--tRNA ligase 2, cytoplasmic OS=Homo sapiens GN=TARSL2 PE=1 SV=1	sp|B7I688|SYT_ACIB5 Threonine--tRNA ligase OS=Acinetobacter baumannii (strain AB0057) GN=thrS PE=3 SV=1	Cytoplasmic Protein	4	90.2
Acinetobacter	Proteobacteria	Acinetobacter baumannii	sp|A2RTX5|SYTC2_HUMAN Probable threonine--tRNA ligase 2, cytoplasmic OS=Homo sapiens GN=TARSL2 PE=1 SV=1	sp|B0VKJ4|SYT_ACIBS Threonine--tRNA ligase OS=Acinetobacter baumannii (strain SDF) GN=thrS PE=3 SV=1	Cytoplasmic Protein	4	90.2
Acinetobacter	Proteobacteria	Acinetobacter baylyi	sp|P41252|SYIC_HUMAN Isoleucine--tRNA ligase, cytoplasmic OS=Homo sapiens GN=IARS PE=1 SV=2	sp|Q6FG02|SYI_ACIAD Isoleucine--tRNA ligase OS=Acinetobacter baylyi (strain ATCC 33305 / BD413 / ADP1) GN=ileS PE=3 SV=1	Cytoplasmic Protein	4	90.2
Acinetobacter	Proteobacteria	Acinetobacter baylyi	sp|P26640|SYVC_HUMAN Valine--tRNA ligase OS=Homo sapiens GN=VARS PE=1 SV=4	sp|Q6F8F0|SYV_ACIAD Valine--tRNA ligase OS=Acinetobacter baylyi (strain ATCC 33305 / BD413 / ADP1) GN=valS PE=3 SV=1	Cytoplasmic Protein	4	90.2
Acinetobacter	Proteobacteria	Acinetobacter baumannii	sp|P54136|SYRC_HUMAN Arginine--tRNA ligase, cytoplasmic OS=Homo sapiens GN=RARS PE=1 SV=2	sp|B0VBN5|SYR_ACIBY Arginine--tRNA ligase OS=Acinetobacter baumannii (strain AYE) GN=argS PE=3 SV=1	Cytoplasmic Protein	1	53.1
Acinetobacter	Proteobacteria	Acinetobacter baumannii	sp|P54136|SYRC_HUMAN Arginine--tRNA ligase, cytoplasmic OS=Homo sapiens GN=RARS PE=1 SV=2	sp|B2I0Y7|SYR_ACIBC Arginine--tRNA ligase OS=Acinetobacter baumannii (strain ACICU) GN=argS PE=3 SV=1	Cytoplasmic Protein	4	90.2
Acinetobacter	Proteobacteria	Acinetobacter baumannii	sp|P54136|SYRC_HUMAN Arginine--tRNA ligase, cytoplasmic OS=Homo sapiens GN=RARS PE=1 SV=2	sp|B7I1U9|SYR_ACIB5 Arginine--tRNA ligase OS=Acinetobacter baumannii (strain AB0057) GN=argS PE=3 SV=1	Cytoplasmic Protein	4	90.2
Acinetobacter	Proteobacteria	Acinetobacter baumannii	sp|P54136|SYRC_HUMAN Arginine--tRNA ligase, cytoplasmic OS=Homo sapiens GN=RARS PE=1 SV=2	sp|B7H2A9|SYR_ACIB3 Arginine--tRNA ligase OS=Acinetobacter baumannii (strain AB307-0294) GN=argS PE=3 SV=1	Cytoplasmic Protein	4	90.2
Acinetobacter	Proteobacteria	Acinetobacter baylyi	sp|Q9BWD1|THIC_HUMAN Acetyl-CoA acetyltransferase, cytosolic OS=Homo sapiens GN=ACAT2 PE=1 SV=2	sp|Q43974|PCAF_ACIAD Beta-ketoadipyl-CoA thiolase OS=Acinetobacter baylyi (strain ATCC 33305 / BD413 / ADP1) GN=pcaF PE=1 SV=1	Cytoplasmic Protein	4	90.2
Acinetobacter	Proteobacteria	Acinetobacter baylyi	sp|Q9BWD1|THIC_HUMAN Acetyl-CoA acetyltransferase, cytosolic OS=Homo sapiens GN=ACAT2 PE=1 SV=2	sp|Q43935|CATF_ACIAD Beta-ketoadipyl-CoA thiolase OS=Acinetobacter baylyi (strain ATCC 33305 / BD413 / ADP1) GN=catF PE=3 SV=1	Cytoplasmic Protein	4	90.2
Acinetobacter	Proteobacteria	Acinetobacter baumannii	sp|Q9BWD1|THIC_HUMAN Acetyl-CoA acetyltransferase, cytosolic OS=Homo sapiens GN=ACAT2 PE=1 SV=2	sp|A3M1H9|FADA_ACIBT 3-ketoacyl-CoA thiolase OS=Acinetobacter baumannii (strain ATCC 17978 / CIP 53.77 / LMG 1025 / NCDC KC755 / 5377) GN=fadA PE=3 SV=2	Cytoplasmic Protein	4	90.2
Acinetobacter	Proteobacteria	Acinetobacter baumannii	sp|Q9BWD1|THIC_HUMAN Acetyl-CoA acetyltransferase, cytosolic OS=Homo sapiens GN=ACAT2 PE=1 SV=2	sp|B7I3P0|FADA_ACIB5 3-ketoacyl-CoA thiolase OS=Acinetobacter baumannii (strain AB0057) GN=fadA PE=3 SV=1	Cytoplasmic Protein	4	90.2
Acinetobacter	Proteobacteria	Acinetobacter baumannii	sp|Q9BWD1|THIC_HUMAN Acetyl-CoA acetyltransferase, cytosolic OS=Homo sapiens GN=ACAT2 PE=1 SV=2	sp|B0VLX5|FADA_ACIBS 3-ketoacyl-CoA thiolase OS=Acinetobacter baumannii (strain SDF) GN=fadA PE=3 SV=1	Cytoplasmic Protein	4	90.2
Acinetobacter	Proteobacteria	Acinetobacter baumannii	sp|Q9BWD1|THIC_HUMAN Acetyl-CoA acetyltransferase, cytosolic OS=Homo sapiens GN=ACAT2 PE=1 SV=2	sp|B0VE46|FADA_ACIBY 3-ketoacyl-CoA thiolase OS=Acinetobacter baumannii (strain AYE) GN=fadA PE=3 SV=1	Cytoplasmic Protein	4	90.2
Acinetobacter	Proteobacteria	Acinetobacter baumannii	sp|Q9BWD1|THIC_HUMAN Acetyl-CoA acetyltransferase, cytosolic OS=Homo sapiens GN=ACAT2 PE=1 SV=2	sp|B7H1I1|FADA_ACIB3 3-ketoacyl-CoA thiolase OS=Acinetobacter baumannii (strain AB307-0294) GN=fadA PE=3 SV=1	Cytoplasmic Protein	4	90.2
Acinetobacter	Proteobacteria	Acinetobacter baumannii	sp|Q9BWD1|THIC_HUMAN Acetyl-CoA acetyltransferase, cytosolic OS=Homo sapiens GN=ACAT2 PE=1 SV=2	sp|B2I2J8|FADA_ACIBC 3-ketoacyl-CoA thiolase OS=Acinetobacter baumannii (strain ACICU) GN=fadA PE=3 SV=1	Cytoplasmic Protein	4	90.2
Acinetobacter	Proteobacteria	Acinetobacter baylyi	sp|Q9BWD1|THIC_HUMAN Acetyl-CoA acetyltransferase, cytosolic OS=Homo sapiens GN=ACAT2 PE=1 SV=2	sp|Q6FF69|FADA_ACIAD 3-ketoacyl-CoA thiolase OS=Acinetobacter baylyi (strain ATCC 33305 / BD413 / ADP1) GN=fadA PE=3 SV=1	Cytoplasmic Protein	4	90.2
Acinetobacter	Proteobacteria	Acinetobacter baumannii	sp|Q8IYQ7|THNS1_HUMAN Threonine synthase-like 1 OS=Homo sapiens GN=THNSL1 PE=1 SV=2	sp|B0V8M8|AROK_ACIBY Shikimate kinase OS=Acinetobacter baumannii (strain AYE) GN=aroK PE=3 SV=1	Cytoplasmic Protein	4	90.2
Acinetobacter	Proteobacteria	Acinetobacter baumannii	sp|Q8IYQ7|THNS1_HUMAN Threonine synthase-like 1 OS=Homo sapiens GN=THNSL1 PE=1 SV=2	sp|B0VQ33|AROK_ACIBS Shikimate kinase OS=Acinetobacter baumannii (strain SDF) GN=aroK PE=3 SV=1	Cytoplasmic Protein	4	90.2
Acinetobacter	Proteobacteria	Acinetobacter baylyi	sp|Q8IYQ7|THNS1_HUMAN Threonine synthase-like 1 OS=Homo sapiens GN=THNSL1 PE=1 SV=2	sp|Q6F7E4|AROK_ACIAD Shikimate kinase OS=Acinetobacter baylyi (strain ATCC 33305 / BD413 / ADP1) GN=aroK PE=3 SV=1	Cytoplasmic Protein	2	68.1
Acinetobacter	Proteobacteria	Acinetobacter baumannii	sp|Q9BXR0|TGT_HUMAN Queuine tRNA-ribosyltransferase OS=Homo sapiens GN=QTRT1 PE=1 SV=3	sp|A3M8S3|TGT_ACIBT Queuine tRNA-ribosyltransferase OS=Acinetobacter baumannii (strain ATCC 17978 / CIP 53.77 / LMG 1025 / NCDC KC755 / 5377) GN=tgt PE=3 SV=2	Cytoplasmic Protein	4	90.2
Acinetobacter	Proteobacteria	Acinetobacter baumannii	sp|Q9BXR0|TGT_HUMAN Queuine tRNA-ribosyltransferase OS=Homo sapiens GN=QTRT1 PE=1 SV=3	sp|B0V625|TGT_ACIBY Queuine tRNA-ribosyltransferase OS=Acinetobacter baumannii (strain AYE) GN=tgt PE=3 SV=1	Cytoplasmic Protein	4	90.2
Acinetobacter	Proteobacteria	Acinetobacter baumannii	sp|Q9BXR0|TGT_HUMAN Queuine tRNA-ribosyltransferase OS=Homo sapiens GN=QTRT1 PE=1 SV=3	sp|B7I976|TGT_ACIB5 Queuine tRNA-ribosyltransferase OS=Acinetobacter baumannii (strain AB0057) GN=tgt PE=3 SV=1	Cytoplasmic Protein	4	90.2
Acinetobacter	Proteobacteria	Acinetobacter baumannii	sp|Q9BXR0|TGT_HUMAN Queuine tRNA-ribosyltransferase OS=Homo sapiens GN=QTRT1 PE=1 SV=3	sp|B7GWL4|TGT_ACIB3 Queuine tRNA-ribosyltransferase OS=Acinetobacter baumannii (strain AB307-0294) GN=tgt PE=3 SV=1	Cytoplasmic Protein	1	53.1
Acinetobacter	Proteobacteria	Acinetobacter baumannii	sp|Q9BXR0|TGT_HUMAN Queuine tRNA-ribosyltransferase OS=Homo sapiens GN=QTRT1 PE=1 SV=3	sp|B0VRA8|TGT_ACIBS Queuine tRNA-ribosyltransferase OS=Acinetobacter baumannii (strain SDF) GN=tgt PE=3 SV=1	Cytoplasmic Protein	4	90.2
Acinetobacter	Proteobacteria	Acinetobacter baumannii	sp|Q9BXR0|TGT_HUMAN Queuine tRNA-ribosyltransferase OS=Homo sapiens GN=QTRT1 PE=1 SV=3	sp|B2HYN7|TGT_ACIBC Queuine tRNA-ribosyltransferase OS=Acinetobacter baumannii (strain ACICU) GN=tgt PE=3 SV=1	Cytoplasmic Protein	4	90.2
Acinetobacter	Proteobacteria	Acinetobacter baylyi	sp|Q9BXR0|TGT_HUMAN Queuine tRNA-ribosyltransferase OS=Homo sapiens GN=QTRT1 PE=1 SV=3	sp|Q6FEJ4|TGT_ACIAD Queuine tRNA-ribosyltransferase OS=Acinetobacter baylyi (strain ATCC 33305 / BD413 / ADP1) GN=tgt PE=3 SV=1	Cytoplasmic Protein	4	90.2
Acinetobacter	Proteobacteria	Acinetobacter baumannii	sp|P60174|TPIS_HUMAN Triosephosphate isomerase OS=Homo sapiens GN=TPI1 PE=1 SV=3	sp|B7H1F6|TPIS_ACIB3 Triosephosphate isomerase OS=Acinetobacter baumannii (strain AB307-0294) GN=tpiA PE=3 SV=1	Cytoplasmic Protein	1	53.1
Acinetobacter	Proteobacteria	Acinetobacter baumannii	sp|P60174|TPIS_HUMAN Triosephosphate isomerase OS=Homo sapiens GN=TPI1 PE=1 SV=3	sp|B2I2M3|TPIS_ACIBC Triosephosphate isomerase OS=Acinetobacter baumannii (strain ACICU) GN=tpiA PE=3 SV=1	Cytoplasmic Protein	4	90.2
Acinetobacter	Proteobacteria	Acinetobacter baumannii	sp|P60174|TPIS_HUMAN Triosephosphate isomerase OS=Homo sapiens GN=TPI1 PE=1 SV=3	sp|B0VLU6|TPIS_ACIBS Triosephosphate isomerase OS=Acinetobacter baumannii (strain SDF) GN=tpiA PE=3 SV=1	Cytoplasmic Protein	4	90.2
Acinetobacter	Proteobacteria	Acinetobacter baumannii	sp|P60174|TPIS_HUMAN Triosephosphate isomerase OS=Homo sapiens GN=TPI1 PE=1 SV=3	sp|A3M1K0|TPIS_ACIBT Triosephosphate isomerase OS=Acinetobacter baumannii (strain ATCC 17978 / CIP 53.77 / LMG 1025 / NCDC KC755 / 5377) GN=tpiA PE=3 SV=2	Cytoplasmic Protein	4	90.2
Acinetobacter	Proteobacteria	Acinetobacter baumannii	sp|P60174|TPIS_HUMAN Triosephosphate isomerase OS=Homo sapiens GN=TPI1 PE=1 SV=3	sp|B0VE65|TPIS_ACIBY Triosephosphate isomerase OS=Acinetobacter baumannii (strain AYE) GN=tpiA PE=3 SV=1	Cytoplasmic Protein	1	53.1
Acinetobacter	Proteobacteria	Acinetobacter baumannii	sp|P60174|TPIS_HUMAN Triosephosphate isomerase OS=Homo sapiens GN=TPI1 PE=1 SV=3	sp|B7I3R5|TPIS_ACIB5 Triosephosphate isomerase OS=Acinetobacter baumannii (strain AB0057) GN=tpiA PE=3 SV=1	Cytoplasmic Protein	2	68.1
Acinetobacter	Proteobacteria	Acinetobacter baumannii	sp|P04818|TYSY_HUMAN Thymidylate synthase OS=Homo sapiens GN=TYMS PE=1 SV=3	sp|B7H0P4|TYSY_ACIB3 Thymidylate synthase OS=Acinetobacter baumannii (strain AB307-0294) GN=thyA PE=3 SV=1	Cytoplasmic Protein	2	68.1
Acinetobacter	Proteobacteria	Acinetobacter baumannii	sp|P04818|TYSY_HUMAN Thymidylate synthase OS=Homo sapiens GN=TYMS PE=1 SV=3	sp|B7I4U0|TYSY_ACIB5 Thymidylate synthase OS=Acinetobacter baumannii (strain AB0057) GN=thyA PE=3 SV=1	Cytoplasmic Protein	1	53.1
Acinetobacter	Proteobacteria	Acinetobacter baylyi	sp|P04818|TYSY_HUMAN Thymidylate synthase OS=Homo sapiens GN=TYMS PE=1 SV=3	sp|Q6FER7|TYSY_ACIAD Thymidylate synthase OS=Acinetobacter baylyi (strain ATCC 33305 / BD413 / ADP1) GN=thyA PE=3 SV=1	Cytoplasmic Protein	4	90.2
Acinetobacter	Proteobacteria	Acinetobacter baumannii	sp|P13051|UNG_HUMAN Uracil-DNA glycosylase OS=Homo sapiens GN=UNG PE=1 SV=2	sp|B0VMZ7|UNG_ACIBS Uracil-DNA glycosylase OS=Acinetobacter baumannii (strain SDF) GN=ung PE=3 SV=1	Periplasmic Protein	1	53.1
Acinetobacter	Proteobacteria	Acinetobacter baumannii	sp|P13051|UNG_HUMAN Uracil-DNA glycosylase OS=Homo sapiens GN=UNG PE=1 SV=2	sp|A3M500|UNG_ACIBT Uracil-DNA glycosylase OS=Acinetobacter baumannii (strain ATCC 17978 / CIP 53.77 / LMG 1025 / NCDC KC755 / 5377) GN=ung PE=3 SV=2	Cytoplasmic Protein	1	53.1
Acinetobacter	Proteobacteria	Acinetobacter baumannii	sp|P13051|UNG_HUMAN Uracil-DNA glycosylase OS=Homo sapiens GN=UNG PE=1 SV=2	sp|B2HZE0|UNG_ACIBC Uracil-DNA glycosylase OS=Acinetobacter baumannii (strain ACICU) GN=ung PE=3 SV=1	Cytoplasmic Protein	4	90.2
Acinetobacter	Proteobacteria	Acinetobacter baumannii	sp|P13051|UNG_HUMAN Uracil-DNA glycosylase OS=Homo sapiens GN=UNG PE=1 SV=2	sp|B0VD25|UNG_ACIBY Uracil-DNA glycosylase OS=Acinetobacter baumannii (strain AYE) GN=ung PE=3 SV=1	Cytoplasmic Protein	4	90.2
Acinetobacter	Proteobacteria	Acinetobacter baumannii	sp|P13051|UNG_HUMAN Uracil-DNA glycosylase OS=Homo sapiens GN=UNG PE=1 SV=2	sp|B7I526|UNG_ACIB5 Uracil-DNA glycosylase OS=Acinetobacter baumannii (strain AB0057) GN=ung PE=3 SV=1	Cytoplasmic Protein	1	53.1
Acinetobacter	Proteobacteria	Acinetobacter baumannii	sp|P13051|UNG_HUMAN Uracil-DNA glycosylase OS=Homo sapiens GN=UNG PE=1 SV=2	sp|B7H3L4|UNG_ACIB3 Uracil-DNA glycosylase OS=Acinetobacter baumannii (strain AB307-0294) GN=ung PE=3 SV=1	Cytoplasmic Protein	4	90.2
Acinetobacter	Proteobacteria	Acinetobacter baylyi	sp|P13051|UNG_HUMAN Uracil-DNA glycosylase OS=Homo sapiens GN=UNG PE=1 SV=2	sp|Q6F9Y2|UNG_ACIAD Uracil-DNA glycosylase OS=Acinetobacter baylyi (strain ATCC 33305 / BD413 / ADP1) GN=ung PE=3 SV=1	Cytoplasmic Protein	1	53.1
Aeromonas	Proteobacteria	Aeromonas salmonicida	sp|O94911|ABCA8_HUMAN ATP-binding cassette sub-family A member 8 OS=Homo sapiens GN=ABCA8 PE=1 SV=3	sp|Q07698|ABCA_AERSA ABC transporter protein AbcA OS=Aeromonas salmonicida GN=abcA PE=3 SV=1	Cytoplasmic Protein	4	90.2
Aeromonas	Proteobacteria	Aeromonas hydrophila	sp|Q9NUB1|ACS2L_HUMAN Acetyl-coenzyme A synthetase 2-like, mitochondrial OS=Homo sapiens GN=ACSS1 PE=1 SV=2	sp|A0KNI2|ACSA_AERHH Acetyl-coenzyme A synthetase OS=Aeromonas hydrophila subsp. hydrophila (strain ATCC 7966 / DSM 30187 / JCM 1027 / KCTC 2358 / NCIMB 9240) GN=acsA PE=3 SV=1	Cytoplasmic Protein	4	90.2
Aeromonas	Proteobacteria	Aeromonas salmonicida	sp|Q9NUB1|ACS2L_HUMAN Acetyl-coenzyme A synthetase 2-like, mitochondrial OS=Homo sapiens GN=ACSS1 PE=1 SV=2	sp|A4SJM6|ACSA_AERS4 Acetyl-coenzyme A synthetase OS=Aeromonas salmonicida (strain A449) GN=acsA PE=3 SV=1	Cytoplasmic Protein	4	90.2
Aeromonas	Proteobacteria	Aeromonas hydrophila	sp|P28838|AMPL_HUMAN Cytosol aminopeptidase OS=Homo sapiens GN=LAP3 PE=1 SV=3	sp|A0KPF3|AMPA_AERHH Probable cytosol aminopeptidase OS=Aeromonas hydrophila subsp. hydrophila (strain ATCC 7966 / DSM 30187 / JCM 1027 / KCTC 2358 / NCIMB 9240) GN=pepA PE=3 SV=1	Cytoplasmic Protein	4	90.2
Aeromonas	Proteobacteria	Aeromonas salmonicida	sp|P28838|AMPL_HUMAN Cytosol aminopeptidase OS=Homo sapiens GN=LAP3 PE=1 SV=3	sp|A4SSA7|AMPA_AERS4 Probable cytosol aminopeptidase OS=Aeromonas salmonicida (strain A449) GN=pepA PE=3 SV=1	Cytoplasmic Protein	1	53.1
Aeromonas	Proteobacteria	Aeromonas hydrophila	sp|P04746|AMYP_HUMAN Pancreatic alpha-amylase OS=Homo sapiens GN=AMY2A PE=1 SV=2	sp|P41131|AMYA_AERHY Alpha-amylase OS=Aeromonas hydrophila GN=amyA PE=3 SV=1	Cytoplasmic Protein	4	90.2
Aeromonas	Proteobacteria	Aeromonas hydrophila	sp|P07741|APT_HUMAN Adenine phosphoribosyltransferase OS=Homo sapiens GN=APRT PE=1 SV=2	sp|A0KKD3|APT_AERHH Adenine phosphoribosyltransferase OS=Aeromonas hydrophila subsp. hydrophila (strain ATCC 7966 / DSM 30187 / JCM 1027 / KCTC 2358 / NCIMB 9240) GN=apt PE=3 SV=2	Cytoplasmic Protein	1	53.1
Aeromonas	Proteobacteria	Aeromonas salmonicida	sp|P07741|APT_HUMAN Adenine phosphoribosyltransferase OS=Homo sapiens GN=APRT PE=1 SV=2	sp|A4SMN3|APT_AERS4 Adenine phosphoribosyltransferase OS=Aeromonas salmonicida (strain A449) GN=apt PE=3 SV=1	Cytoplasmic Protein	4	90.2
Aeromonas	Proteobacteria	Aeromonas salmonicida	sp|P04424|ARLY_HUMAN Argininosuccinate lyase OS=Homo sapiens GN=ASL PE=1 SV=4	sp|A4SIM6|ARLY_AERS4 Argininosuccinate lyase OS=Aeromonas salmonicida (strain A449) GN=argH PE=3 SV=1	Cytoplasmic Protein	4	90.2
Aeromonas	Proteobacteria	Aeromonas hydrophila	sp|P04424|ARLY_HUMAN Argininosuccinate lyase OS=Homo sapiens GN=ASL PE=1 SV=4	sp|A0KFV4|ARLY_AERHH Argininosuccinate lyase OS=Aeromonas hydrophila subsp. hydrophila (strain ATCC 7966 / DSM 30187 / JCM 1027 / KCTC 2358 / NCIMB 9240) GN=argH PE=3 SV=1	Cytoplasmic Protein	4	90.2
Aeromonas	Proteobacteria	Aeromonas salmonicida	sp|P00966|ASSY_HUMAN Argininosuccinate synthase OS=Homo sapiens GN=ASS1 PE=1 SV=2	sp|A4SIM5|ASSY_AERS4 Argininosuccinate synthase OS=Aeromonas salmonicida (strain A449) GN=argG PE=3 SV=1	Cytoplasmic Protein	4	90.2
Aeromonas	Proteobacteria	Aeromonas hydrophila	sp|P00966|ASSY_HUMAN Argininosuccinate synthase OS=Homo sapiens GN=ASS1 PE=1 SV=2	sp|A0KFV3|ASSY_AERHH Argininosuccinate synthase OS=Aeromonas hydrophila subsp. hydrophila (strain ATCC 7966 / DSM 30187 / JCM 1027 / KCTC 2358 / NCIMB 9240) GN=argG PE=3 SV=1	Cytoplasmic Protein	1	53.1
Aeromonas	Proteobacteria	Aeromonas hydrophila	sp|P06576|ATPB_HUMAN ATP synthase subunit beta, mitochondrial OS=Homo sapiens GN=ATP5B PE=1 SV=3	sp|A0KQX8|ATPB_AERHH ATP synthase subunit beta OS=Aeromonas hydrophila subsp. hydrophila (strain ATCC 7966 / DSM 30187 / JCM 1027 / KCTC 2358 / NCIMB 9240) GN=atpD PE=3 SV=1	Cytoplasmic Protein	4	90.2
Aeromonas	Proteobacteria	Aeromonas salmonicida	sp|P06576|ATPB_HUMAN ATP synthase subunit beta, mitochondrial OS=Homo sapiens GN=ATP5B PE=1 SV=3	sp|A4STP3|ATPB_AERS4 ATP synthase subunit beta OS=Aeromonas salmonicida (strain A449) GN=atpD PE=3 SV=1	Cytoplasmic Protein	1	53.1
Aeromonas	Proteobacteria	Aeromonas salmonicida	sp|P11586|C1TC_HUMAN C-1-tetrahydrofolate synthase, cytoplasmic OS=Homo sapiens GN=MTHFD1 PE=1 SV=3	sp|A4SPE5|FTHS_AERS4 Formate--tetrahydrofolate ligase OS=Aeromonas salmonicida (strain A449) GN=fhs PE=3 SV=1	Cytoplasmic Protein	1	53.1
Aeromonas	Proteobacteria	Aeromonas hydrophila	sp|P11586|C1TC_HUMAN C-1-tetrahydrofolate synthase, cytoplasmic OS=Homo sapiens GN=MTHFD1 PE=1 SV=3	sp|A0KIN9|FTHS_AERHH Formate--tetrahydrofolate ligase OS=Aeromonas hydrophila subsp. hydrophila (strain ATCC 7966 / DSM 30187 / JCM 1027 / KCTC 2358 / NCIMB 9240) GN=fhs PE=3 SV=1	Cytoplasmic Protein	4	90.2
Aeromonas	Proteobacteria	Aeromonas hydrophila	sp|P11586|C1TC_HUMAN C-1-tetrahydrofolate synthase, cytoplasmic OS=Homo sapiens GN=MTHFD1 PE=1 SV=3	sp|A0KJD4|FOLD_AERHH Bifunctional protein FolD OS=Aeromonas hydrophila subsp. hydrophila (strain ATCC 7966 / DSM 30187 / JCM 1027 / KCTC 2358 / NCIMB 9240) GN=folD PE=3 SV=1	Cytoplasmic Protein	4	90.2
Aeromonas	Proteobacteria	Aeromonas salmonicida	sp|P11586|C1TC_HUMAN C-1-tetrahydrofolate synthase, cytoplasmic OS=Homo sapiens GN=MTHFD1 PE=1 SV=3	sp|A4SNM0|FOLD_AERS4 Bifunctional protein FolD OS=Aeromonas salmonicida (strain A449) GN=folD PE=3 SV=1	Cytoplasmic Protein	4	90.2
Aeromonas	Proteobacteria	Aeromonas salmonicida	sp|P10809|CH60_HUMAN 60 kDa heat shock protein, mitochondrial OS=Homo sapiens GN=HSPD1 PE=1 SV=2	sp|A4SR80|CH60_AERS4 60 kDa chaperonin OS=Aeromonas salmonicida (strain A449) GN=groL PE=3 SV=1	Cytoplasmic Protein	1	53.1
Aeromonas	Proteobacteria	Aeromonas hydrophila	sp|P10809|CH60_HUMAN 60 kDa heat shock protein, mitochondrial OS=Homo sapiens GN=HSPD1 PE=1 SV=2	sp|A0KGL1|CH60_AERHH 60 kDa chaperonin OS=Aeromonas hydrophila subsp. hydrophila (strain ATCC 7966 / DSM 30187 / JCM 1027 / KCTC 2358 / NCIMB 9240) GN=groL PE=3 SV=1	Cytoplasmic Protein	4	90.2
Aeromonas	Proteobacteria	Aeromonas hydrophila	sp|O76031|CLPX_HUMAN ATP-dependent Clp protease ATP-binding subunit clpX-like, mitochondrial OS=Homo sapiens GN=CLPX PE=1 SV=2	sp|A0KJU2|CLPX_AERHH ATP-dependent Clp protease ATP-binding subunit ClpX OS=Aeromonas hydrophila subsp. hydrophila (strain ATCC 7966 / DSM 30187 / JCM 1027 / KCTC 2358 / NCIMB 9240) GN=clpX PE=3 SV=1	Cytoplasmic Protein	4	90.2
Aeromonas	Proteobacteria	Aeromonas salmonicida	sp|O76031|CLPX_HUMAN ATP-dependent Clp protease ATP-binding subunit clpX-like, mitochondrial OS=Homo sapiens GN=CLPX PE=1 SV=2	sp|A4SM43|CLPX_AERS4 ATP-dependent Clp protease ATP-binding subunit ClpX OS=Aeromonas salmonicida (strain A449) GN=clpX PE=3 SV=1	Cytoplasmic Protein	1	53.1
Aeromonas	Proteobacteria	Aeromonas salmonicida	sp|Q8WVB6|CTF18_HUMAN Chromosome transmission fidelity protein 18 homolog OS=Homo sapiens GN=CHTF18 PE=1 SV=1	sp|A4SJ26|RUVB_AERS4 Holliday junction ATP-dependent DNA helicase RuvB OS=Aeromonas salmonicida (strain A449) GN=ruvB PE=3 SV=1	Cytoplasmic Protein	4	90.2
Aeromonas	Proteobacteria	Aeromonas hydrophila	sp|Q8WVB6|CTF18_HUMAN Chromosome transmission fidelity protein 18 homolog OS=Homo sapiens GN=CHTF18 PE=1 SV=1	sp|A0KPA2|RUVB_AERHH Holliday junction ATP-dependent DNA helicase RuvB OS=Aeromonas hydrophila subsp. hydrophila (strain ATCC 7966 / DSM 30187 / JCM 1027 / KCTC 2358 / NCIMB 9240) GN=ruvB PE=3 SV=1	Cytoplasmic Protein	1	53.1
Aeromonas	Proteobacteria	Aeromonas hydrophila	sp|Q9UJV9|DDX41_HUMAN Probable ATP-dependent RNA helicase DDX41 OS=Homo sapiens GN=DDX41 PE=1 SV=2	sp|A0KEG9|RHLB_AERHH ATP-dependent RNA helicase RhlB OS=Aeromonas hydrophila subsp. hydrophila (strain ATCC 7966 / DSM 30187 / JCM 1027 / KCTC 2358 / NCIMB 9240) GN=rhlB PE=3 SV=1	Cytoplasmic Protein	4	90.2
Aeromonas	Proteobacteria	Aeromonas salmonicida	sp|Q9UJV9|DDX41_HUMAN Probable ATP-dependent RNA helicase DDX41 OS=Homo sapiens GN=DDX41 PE=1 SV=2	sp|A4STJ7|RHLB_AERS4 ATP-dependent RNA helicase RhlB OS=Aeromonas salmonicida (strain A449) GN=rhlB PE=3 SV=1	Cytoplasmic Protein	4	90.2
Aeromonas	Proteobacteria	Aeromonas salmonicida	sp|P06132|DCUP_HUMAN Uroporphyrinogen decarboxylase OS=Homo sapiens GN=UROD PE=1 SV=2	sp|A4SJ51|DCUP_AERS4 Uroporphyrinogen decarboxylase OS=Aeromonas salmonicida (strain A449) GN=hemE PE=3 SV=1	Cytoplasmic Protein	4	90.2
Aeromonas	Proteobacteria	Aeromonas salmonicida	sp|Q9Y315|DEOC_HUMAN Deoxyribose-phosphate aldolase OS=Homo sapiens GN=DERA PE=1 SV=2	sp|A4SRU4|DEOC_AERS4 Deoxyribose-phosphate aldolase OS=Aeromonas salmonicida (strain A449) GN=deoC PE=3 SV=1	Cytoplasmic Protein	4	90.2
Aeromonas	Proteobacteria	Aeromonas hydrophila	sp|Q9Y315|DEOC_HUMAN Deoxyribose-phosphate aldolase OS=Homo sapiens GN=DERA PE=1 SV=2	sp|A0KPE4|DEOC_AERHH Deoxyribose-phosphate aldolase OS=Aeromonas hydrophila subsp. hydrophila (strain ATCC 7966 / DSM 30187 / JCM 1027 / KCTC 2358 / NCIMB 9240) GN=deoC PE=3 SV=1	Cytoplasmic Protein	4	90.2
Aeromonas	Proteobacteria	Aeromonas salmonicida	sp|P06733|ENOA_HUMAN Alpha-enolase OS=Homo sapiens GN=ENO1 PE=1 SV=2	sp|A4SRC1|ENO_AERS4 Enolase OS=Aeromonas salmonicida (strain A449) GN=eno PE=3 SV=1	Cytoplasmic Protein	4	90.2
Aeromonas	Proteobacteria	Aeromonas hydrophila	sp|P06733|ENOA_HUMAN Alpha-enolase OS=Homo sapiens GN=ENO1 PE=1 SV=2	sp|A0KGH3|ENO_AERHH Enolase OS=Aeromonas hydrophila subsp. hydrophila (strain ATCC 7966 / DSM 30187 / JCM 1027 / KCTC 2358 / NCIMB 9240) GN=eno PE=3 SV=1	Cytoplasmic Protein	4	90.2
Aeromonas	Proteobacteria	Aeromonas hydrophila	sp|P06733|ENOA_HUMAN Alpha-enolase OS=Homo sapiens GN=ENO1 PE=1 SV=2	sp|Q8GE63|ENO_AERHY Enolase OS=Aeromonas hydrophila GN=eno PE=3 SV=1	Cytoplasmic Protein	4	90.2
Aeromonas	Proteobacteria	Aeromonas hydrophila	sp|P14625|ENPL_HUMAN Endoplasmin OS=Homo sapiens GN=HSP90B1 PE=1 SV=1	sp|A0KL53|HTPG_AERHH Chaperone protein HtpG OS=Aeromonas hydrophila subsp. hydrophila (strain ATCC 7966 / DSM 30187 / JCM 1027 / KCTC 2358 / NCIMB 9240) GN=htpG PE=3 SV=1	Cytoplasmic Protein	4	90.2
Aeromonas	Proteobacteria	Aeromonas salmonicida	sp|P14625|ENPL_HUMAN Endoplasmin OS=Homo sapiens GN=HSP90B1 PE=1 SV=1	sp|A4SLY0|HTPG_AERS4 Chaperone protein HtpG OS=Aeromonas salmonicida (strain A449) GN=htpG PE=3 SV=1	Cytoplasmic Protein	1	53.1
Aeromonas	Proteobacteria	Aeromonas hydrophila	sp|Q96RP9|EFGM_HUMAN Elongation factor G, mitochondrial OS=Homo sapiens GN=GFM1 PE=1 SV=2	sp|A0KQ96|EFG_AERHH Elongation factor G OS=Aeromonas hydrophila subsp. hydrophila (strain ATCC 7966 / DSM 30187 / JCM 1027 / KCTC 2358 / NCIMB 9240) GN=fusA PE=3 SV=1	Cytoplasmic Protein	4	90.2
Aeromonas	Proteobacteria	Aeromonas hydrophila	sp|P09467|F16P1_HUMAN Fructose-1,6-bisphosphatase 1 OS=Homo sapiens GN=FBP1 PE=1 SV=5	sp|A0KJT2|F16PA_AERHH Fructose-1,6-bisphosphatase class 1 OS=Aeromonas hydrophila subsp. hydrophila (strain ATCC 7966 / DSM 30187 / JCM 1027 / KCTC 2358 / NCIMB 9240) GN=fbp PE=3 SV=1	Cytoplasmic Protein	1	53.1
Aeromonas	Proteobacteria	Aeromonas salmonicida	sp|P09467|F16P1_HUMAN Fructose-1,6-bisphosphatase 1 OS=Homo sapiens GN=FBP1 PE=1 SV=5	sp|A4SM33|F16PA_AERS4 Fructose-1,6-bisphosphatase class 1 OS=Aeromonas salmonicida (strain A449) GN=fbp PE=3 SV=1	Cytoplasmic Protein	4	90.2
Aeromonas	Proteobacteria	Aeromonas hydrophila	sp|P51570|GALK1_HUMAN Galactokinase OS=Homo sapiens GN=GALK1 PE=1 SV=1	sp|A0KQH8|GAL1_AERHH Galactokinase OS=Aeromonas hydrophila subsp. hydrophila (strain ATCC 7966 / DSM 30187 / JCM 1027 / KCTC 2358 / NCIMB 9240) GN=galK PE=3 SV=1	Cytoplasmic Protein	1	53.1
Aeromonas	Proteobacteria	Aeromonas hydrophila	sp|O14556|G3PT_HUMAN Glyceraldehyde-3-phosphate dehydrogenase, testis-specific OS=Homo sapiens GN=GAPDHS PE=1 SV=2	sp|A0KGD2|E4PD_AERHH D-erythrose-4-phosphate dehydrogenase OS=Aeromonas hydrophila subsp. hydrophila (strain ATCC 7966 / DSM 30187 / JCM 1027 / KCTC 2358 / NCIMB 9240) GN=epd PE=3 SV=1	Cytoplasmic Protein	4	90.2
Aeromonas	Proteobacteria	Aeromonas salmonicida	sp|O14556|G3PT_HUMAN Glyceraldehyde-3-phosphate dehydrogenase, testis-specific OS=Homo sapiens GN=GAPDHS PE=1 SV=2	sp|A4SRF2|E4PD_AERS4 D-erythrose-4-phosphate dehydrogenase OS=Aeromonas salmonicida (strain A449) GN=epd PE=3 SV=1	Cytoplasmic Protein	4	90.2
Aeromonas	Proteobacteria	Aeromonas salmonicida	sp|P06744|G6PI_HUMAN Glucose-6-phosphate isomerase OS=Homo sapiens GN=GPI PE=1 SV=4	sp|A4STE1|G6PI_AERS4 Glucose-6-phosphate isomerase OS=Aeromonas salmonicida (strain A449) GN=pgi PE=3 SV=1	Cytoplasmic Protein	4	90.2
Aeromonas	Proteobacteria	Aeromonas hydrophila	sp|P06744|G6PI_HUMAN Glucose-6-phosphate isomerase OS=Homo sapiens GN=GPI PE=1 SV=4	sp|A0KEM2|G6PI_AERHH Glucose-6-phosphate isomerase OS=Aeromonas hydrophila subsp. hydrophila (strain ATCC 7966 / DSM 30187 / JCM 1027 / KCTC 2358 / NCIMB 9240) GN=pgi PE=3 SV=1	Cytoplasmic Protein	4	90.2
Aeromonas	Proteobacteria	Aeromonas hydrophila	sp|Q14409|GLPK3_HUMAN Putative glycerol kinase 3 OS=Homo sapiens GN=GK3P PE=5 SV=2	sp|A0KIT3|GLPK_AERHH Glycerol kinase OS=Aeromonas hydrophila subsp. hydrophila (strain ATCC 7966 / DSM 30187 / JCM 1027 / KCTC 2358 / NCIMB 9240) GN=glpK PE=3 SV=1	Cytoplasmic Protein	4	90.2
Aeromonas	Proteobacteria	Aeromonas salmonicida	sp|Q14409|GLPK3_HUMAN Putative glycerol kinase 3 OS=Homo sapiens GN=GK3P PE=5 SV=2	sp|A4SPA7|GLPK_AERS4 Glycerol kinase OS=Aeromonas salmonicida (strain A449) GN=glpK PE=3 SV=1	Cytoplasmic Protein	4	90.2
Aeromonas	Proteobacteria	Aeromonas hydrophila	sp|P36959|GMPR1_HUMAN GMP reductase 1 OS=Homo sapiens GN=GMPR PE=1 SV=1	sp|A0KN65|GUAC_AERHH GMP reductase OS=Aeromonas hydrophila subsp. hydrophila (strain ATCC 7966 / DSM 30187 / JCM 1027 / KCTC 2358 / NCIMB 9240) GN=guaC PE=3 SV=1	Cytoplasmic Protein	1	53.1
Aeromonas	Proteobacteria	Aeromonas salmonicida	sp|P36959|GMPR1_HUMAN GMP reductase 1 OS=Homo sapiens GN=GMPR PE=1 SV=1	sp|A4SJY8|GUAC_AERS4 GMP reductase OS=Aeromonas salmonicida (strain A449) GN=guaC PE=3 SV=1	Cytoplasmic Protein	4	90.2
Aeromonas	Proteobacteria	Aeromonas hydrophila	sp|P46926|GNPI1_HUMAN Glucosamine-6-phosphate isomerase 1 OS=Homo sapiens GN=GNPDA1 PE=1 SV=1	sp|A0KIG3|NAGB_AERHH Glucosamine-6-phosphate deaminase OS=Aeromonas hydrophila subsp. hydrophila (strain ATCC 7966 / DSM 30187 / JCM 1027 / KCTC 2358 / NCIMB 9240) GN=nagB PE=3 SV=1	Cytoplasmic Protein	4	90.2
Aeromonas	Proteobacteria	Aeromonas salmonicida	sp|P46926|GNPI1_HUMAN Glucosamine-6-phosphate isomerase 1 OS=Homo sapiens GN=GNPDA1 PE=1 SV=1	sp|A4SPM2|NAGB_AERS4 Glucosamine-6-phosphate deaminase OS=Aeromonas salmonicida (strain A449) GN=nagB PE=3 SV=1	Cytoplasmic Protein	5	98.1
Aeromonas	Proteobacteria	Aeromonas salmonicida	sp|P34897|GLYM_HUMAN Serine hydroxymethyltransferase, mitochondrial OS=Homo sapiens GN=SHMT2 PE=1 SV=3	sp|A4SJN4|GLYA_AERS4 Serine hydroxymethyltransferase OS=Aeromonas salmonicida (strain A449) GN=glyA PE=3 SV=1	Cytoplasmic Protein	3	71.1
Aeromonas	Proteobacteria	Aeromonas hydrophila	sp|P34897|GLYM_HUMAN Serine hydroxymethyltransferase, mitochondrial OS=Homo sapiens GN=SHMT2 PE=1 SV=3	sp|A0KNH4|GLYA_AERHH Serine hydroxymethyltransferase OS=Aeromonas hydrophila subsp. hydrophila (strain ATCC 7966 / DSM 30187 / JCM 1027 / KCTC 2358 / NCIMB 9240) GN=glyA PE=3 SV=1	Cytoplasmic Protein	1	53.1
Aeromonas	Proteobacteria	Aeromonas hydrophila	sp|P11021|GRP78_HUMAN 78 kDa glucose-regulated protein OS=Homo sapiens GN=HSPA5 PE=1 SV=2	sp|A0KMI6|DNAK_AERHH Chaperone protein DnaK OS=Aeromonas hydrophila subsp. hydrophila (strain ATCC 7966 / DSM 30187 / JCM 1027 / KCTC 2358 / NCIMB 9240) GN=dnaK PE=3 SV=1	Cytoplasmic Protein	1	53.1
Aeromonas	Proteobacteria	Aeromonas salmonicida	sp|P11021|GRP78_HUMAN 78 kDa glucose-regulated protein OS=Homo sapiens GN=HSPA5 PE=1 SV=2	sp|A4SQ25|DNAK_AERS4 Chaperone protein DnaK OS=Aeromonas salmonicida (strain A449) GN=dnaK PE=3 SV=1	Cytoplasmic Protein	4	90.2
Aeromonas	Proteobacteria	Aeromonas hydrophila	sp|P49915|GUAA_HUMAN GMP synthase [glutamine-hydrolyzing] OS=Homo sapiens GN=GMPS PE=1 SV=1	sp|A0KJS0|GUAA_AERHH GMP synthase [glutamine-hydrolyzing] OS=Aeromonas hydrophila subsp. hydrophila (strain ATCC 7966 / DSM 30187 / JCM 1027 / KCTC 2358 / NCIMB 9240) GN=guaA PE=3 SV=1	Cytoplasmic Protein	4	90.2
Aeromonas	Proteobacteria	Aeromonas salmonicida	sp|P49915|GUAA_HUMAN GMP synthase [glutamine-hydrolyzing] OS=Homo sapiens GN=GMPS PE=1 SV=1	sp|A4SM23|GUAA_AERS4 GMP synthase [glutamine-hydrolyzing] OS=Aeromonas salmonicida (strain A449) GN=guaA PE=3 SV=1	Cytoplasmic Protein	4	90.2
Aeromonas	Proteobacteria	Aeromonas salmonicida	sp|P36551|HEM6_HUMAN Oxygen-dependent coproporphyrinogen-III oxidase, mitochondrial OS=Homo sapiens GN=CPOX PE=1 SV=3	sp|A4ST50|HEM6_AERS4 Oxygen-dependent coproporphyrinogen-III oxidase OS=Aeromonas salmonicida (strain A449) GN=hemF PE=3 SV=1	Cytoplasmic Protein	4	90.2
Aeromonas	Proteobacteria	Aeromonas hydrophila	sp|P36551|HEM6_HUMAN Oxygen-dependent coproporphyrinogen-III oxidase, mitochondrial OS=Homo sapiens GN=CPOX PE=1 SV=3	sp|A0KEX7|HEM6_AERHH Oxygen-dependent coproporphyrinogen-III oxidase OS=Aeromonas hydrophila subsp. hydrophila (strain ATCC 7966 / DSM 30187 / JCM 1027 / KCTC 2358 / NCIMB 9240) GN=hemF PE=3 SV=1	Cytoplasmic Protein	4	90.2
Aeromonas	Proteobacteria	Aeromonas hydrophila	sp|Q9Y5R4|HEMK1_HUMAN HemK methyltransferase family member 1 OS=Homo sapiens GN=HEMK1 PE=1 SV=1	sp|A0KPC4|TRMN6_AERHH tRNA1(Val) (adenine(37)-N6)-methyltransferase OS=Aeromonas hydrophila subsp. hydrophila (strain ATCC 7966 / DSM 30187 / JCM 1027 / KCTC 2358 / NCIMB 9240) GN=AHA_3669 PE=3 SV=1	Cytoplasmic Protein	1	53.1
Aeromonas	Proteobacteria	Aeromonas salmonicida	sp|Q9Y5R4|HEMK1_HUMAN HemK methyltransferase family member 1 OS=Homo sapiens GN=HEMK1 PE=1 SV=1	sp|A4SRS5|TRMN6_AERS4 tRNA1(Val) (adenine(37)-N6)-methyltransferase OS=Aeromonas salmonicida (strain A449) GN=ASA_3636 PE=3 SV=1	Cytoplasmic Protein	4	90.2
Aeromonas	Proteobacteria	Aeromonas hydrophila	sp|P46199|IF2M_HUMAN Translation initiation factor IF-2, mitochondrial OS=Homo sapiens GN=MTIF2 PE=1 SV=2	sp|A0KNE3|IF2_AERHH Translation initiation factor IF-2 OS=Aeromonas hydrophila subsp. hydrophila (strain ATCC 7966 / DSM 30187 / JCM 1027 / KCTC 2358 / NCIMB 9240) GN=infB PE=3 SV=1	Cytoplasmic Protein	4	90.2
Aeromonas	Proteobacteria	Aeromonas salmonicida	sp|P46199|IF2M_HUMAN Translation initiation factor IF-2, mitochondrial OS=Homo sapiens GN=MTIF2 PE=1 SV=2	sp|A4SJR5|IF2_AERS4 Translation initiation factor IF-2 OS=Aeromonas salmonicida (strain A449) GN=infB PE=3 SV=1	Cytoplasmic Protein	1	53.1
Aeromonas	Proteobacteria	Aeromonas hydrophila	sp|P54819|KAD2_HUMAN Adenylate kinase 2, mitochondrial OS=Homo sapiens GN=AK2 PE=1 SV=2	sp|A0KL52|KAD_AERHH Adenylate kinase OS=Aeromonas hydrophila subsp. hydrophila (strain ATCC 7966 / DSM 30187 / JCM 1027 / KCTC 2358 / NCIMB 9240) GN=adk PE=3 SV=1	Cytoplasmic Protein	4	90.2
Aeromonas	Proteobacteria	Aeromonas salmonicida	sp|P54819|KAD2_HUMAN Adenylate kinase 2, mitochondrial OS=Homo sapiens GN=AK2 PE=1 SV=2	sp|A4SLY1|KAD_AERS4 Adenylate kinase OS=Aeromonas salmonicida (strain A449) GN=adk PE=3 SV=1	Cytoplasmic Protein	4	90.2
Aeromonas	Proteobacteria	Aeromonas salmonicida	sp|Q86U28|ISCA2_HUMAN Iron-sulfur cluster assembly 2 homolog, mitochondrial OS=Homo sapiens GN=ISCA2 PE=1 SV=2	sp|A4SJ82|ERPA_AERS4 Iron-sulfur cluster insertion protein ErpA OS=Aeromonas salmonicida (strain A449) GN=erpA PE=3 SV=1	Cytoplasmic Protein	4	90.2
Aeromonas	Proteobacteria	Aeromonas hydrophila	sp|Q86U28|ISCA2_HUMAN Iron-sulfur cluster assembly 2 homolog, mitochondrial OS=Homo sapiens GN=ISCA2 PE=1 SV=2	sp|A0KNY6|ERPA_AERHH Iron-sulfur cluster insertion protein ErpA OS=Aeromonas hydrophila subsp. hydrophila (strain ATCC 7966 / DSM 30187 / JCM 1027 / KCTC 2358 / NCIMB 9240) GN=erpA PE=3 SV=2	Cytoplasmic Protein	4	90.2
Aeromonas	Proteobacteria	Aeromonas hydrophila	sp|P48163|MAOX_HUMAN NADP-dependent malic enzyme OS=Homo sapiens GN=ME1 PE=1 SV=1	sp|A0KHR8|MAO1_AERHH NAD-dependent malic enzyme OS=Aeromonas hydrophila subsp. hydrophila (strain ATCC 7966 / DSM 30187 / JCM 1027 / KCTC 2358 / NCIMB 9240) GN=maeA PE=3 SV=2	Cytoplasmic Protein	4	90.2
Aeromonas	Proteobacteria	Aeromonas salmonicida	sp|P48163|MAOX_HUMAN NADP-dependent malic enzyme OS=Homo sapiens GN=ME1 PE=1 SV=1	sp|A4SKE9|MAO1_AERS4 NAD-dependent malic enzyme OS=Aeromonas salmonicida (strain A449) GN=maeA PE=3 SV=1	Cytoplasmic Protein	1	53.1
Aeromonas	Proteobacteria	Aeromonas hydrophila	sp|A6NJ78|MET15_HUMAN Probable methyltransferase-like protein 15 OS=Homo sapiens GN=METTL15 PE=1 SV=1	sp|A0KPY0|RSMH_AERHH Ribosomal RNA small subunit methyltransferase H OS=Aeromonas hydrophila subsp. hydrophila (strain ATCC 7966 / DSM 30187 / JCM 1027 / KCTC 2358 / NCIMB 9240) GN=rsmH PE=3 SV=1	Cytoplasmic Protein	5	98.1
Aeromonas	Proteobacteria	Aeromonas salmonicida	sp|A6NJ78|MET15_HUMAN Probable methyltransferase-like protein 15 OS=Homo sapiens GN=METTL15 PE=1 SV=1	sp|A4SI48|RSMH_AERS4 Ribosomal RNA small subunit methyltransferase H OS=Aeromonas salmonicida (strain A449) GN=rsmH PE=3 SV=1	Cytoplasmic Protein	4	90.2
Aeromonas	Proteobacteria	Aeromonas hydrophila	sp|P40692|MLH1_HUMAN DNA mismatch repair protein Mlh1 OS=Homo sapiens GN=MLH1 PE=1 SV=1	sp|A0KGR9|MUTL_AERHH DNA mismatch repair protein MutL OS=Aeromonas hydrophila subsp. hydrophila (strain ATCC 7966 / DSM 30187 / JCM 1027 / KCTC 2358 / NCIMB 9240) GN=mutL PE=3 SV=1	Cytoplasmic Protein	3	71.1
Aeromonas	Proteobacteria	Aeromonas salmonicida	sp|P40692|MLH1_HUMAN DNA mismatch repair protein Mlh1 OS=Homo sapiens GN=MLH1 PE=1 SV=1	sp|A4SR27|MUTL_AERS4 DNA mismatch repair protein MutL OS=Aeromonas salmonicida (strain A449) GN=mutL PE=3 SV=1	Cytoplasmic Protein	1	53.1
Aeromonas	Proteobacteria	Aeromonas salmonicida	sp|P43246|MSH2_HUMAN DNA mismatch repair protein Msh2 OS=Homo sapiens GN=MSH2 PE=1 SV=1	sp|A4SIL2|MUTS_AERS4 DNA mismatch repair protein MutS OS=Aeromonas salmonicida (strain A449) GN=mutS PE=3 SV=1	Cytoplasmic Protein	5	98.1
Aeromonas	Proteobacteria	Aeromonas hydrophila	sp|P43246|MSH2_HUMAN DNA mismatch repair protein Msh2 OS=Homo sapiens GN=MSH2 PE=1 SV=1	sp|A0KPG5|MUTS_AERHH DNA mismatch repair protein MutS OS=Aeromonas hydrophila subsp. hydrophila (strain ATCC 7966 / DSM 30187 / JCM 1027 / KCTC 2358 / NCIMB 9240) GN=mutS PE=3 SV=1	Cytoplasmic Protein	4	90.2
Aeromonas	Proteobacteria	Aeromonas hydrophila	sp|Q9UIF7|MUTYH_HUMAN Adenine DNA glycosylase OS=Homo sapiens GN=MUTYH PE=1 SV=1	sp|P46230|MUTY_AERHY A/G-specific adenine glycosylase (Fragment) OS=Aeromonas hydrophila GN=mutY PE=3 SV=1	Cytoplasmic Protein	1	53.1
Aeromonas	Proteobacteria	Aeromonas salmonicida	sp|Q9Y2Z2|MTO1_HUMAN Protein MTO1 homolog, mitochondrial OS=Homo sapiens GN=MTO1 PE=1 SV=2	sp|A4STQ4|MNMG_AERS4 tRNA uridine 5-carboxymethylaminomethyl modification enzyme MnmG OS=Aeromonas salmonicida (strain A449) GN=mnmG PE=3 SV=1	Cytoplasmic Protein	4	90.2
Aeromonas	Proteobacteria	Aeromonas hydrophila	sp|Q9Y2Z2|MTO1_HUMAN Protein MTO1 homolog, mitochondrial OS=Homo sapiens GN=MTO1 PE=1 SV=2	sp|A0KQY9|MNMG_AERHH tRNA uridine 5-carboxymethylaminomethyl modification enzyme MnmG OS=Aeromonas hydrophila subsp. hydrophila (strain ATCC 7966 / DSM 30187 / JCM 1027 / KCTC 2358 / NCIMB 9240) GN=mnmG PE=3 SV=1	Cytoplasmic Protein	4	90.2
Aeromonas	Proteobacteria	Aeromonas hydrophila	sp|Q9Y697|NFS1_HUMAN Cysteine desulfurase, mitochondrial OS=Homo sapiens GN=NFS1 PE=1 SV=3	sp|A0KJ32|ISCS_AERHH Cysteine desulfurase IscS OS=Aeromonas hydrophila subsp. hydrophila (strain ATCC 7966 / DSM 30187 / JCM 1027 / KCTC 2358 / NCIMB 9240) GN=iscS PE=3 SV=1	Cytoplasmic Protein	4	90.2
Aeromonas	Proteobacteria	Aeromonas salmonicida	sp|Q9Y697|NFS1_HUMAN Cysteine desulfurase, mitochondrial OS=Homo sapiens GN=NFS1 PE=1 SV=3	sp|A4SP14|ISCS_AERS4 Cysteine desulfurase IscS OS=Aeromonas salmonicida (strain A449) GN=iscS PE=3 SV=1	Cytoplasmic Protein	1	53.1
Aeromonas	Proteobacteria	Aeromonas salmonicida	sp|Q08J23|NSUN2_HUMAN tRNA (cytosine(34)-C(5))-methyltransferase OS=Homo sapiens GN=NSUN2 PE=1 SV=2	sp|A4SMI9|RSMF_AERS4 Ribosomal RNA small subunit methyltransferase F OS=Aeromonas salmonicida (strain A449) GN=rsmF PE=3 SV=1	Cytoplasmic Protein	4	90.2
Aeromonas	Proteobacteria	Aeromonas hydrophila	sp|Q08J23|NSUN2_HUMAN tRNA (cytosine(34)-C(5))-methyltransferase OS=Homo sapiens GN=NSUN2 PE=1 SV=2	sp|A0KKI5|RSMF_AERHH Ribosomal RNA small subunit methyltransferase F OS=Aeromonas hydrophila subsp. hydrophila (strain ATCC 7966 / DSM 30187 / JCM 1027 / KCTC 2358 / NCIMB 9240) GN=rsmF PE=3 SV=2	Cytoplasmic Protein	4	90.2
Aeromonas	Proteobacteria	Aeromonas hydrophila	sp|Q9H4B0|OSGP2_HUMAN Probable tRNA N6-adenosine threonylcarbamoyltransferase, mitochondrial OS=Homo sapiens GN=OSGEPL1 PE=2 SV=2	sp|A0KGI3|TSAD_AERHH tRNA N6-adenosine threonylcarbamoyltransferase OS=Aeromonas hydrophila subsp. hydrophila (strain ATCC 7966 / DSM 30187 / JCM 1027 / KCTC 2358 / NCIMB 9240) GN=tsaD PE=3 SV=1	Cytoplasmic Protein	4	90.2
Aeromonas	Proteobacteria	Aeromonas salmonicida	sp|Q9H4B0|OSGP2_HUMAN Probable tRNA N6-adenosine threonylcarbamoyltransferase, mitochondrial OS=Homo sapiens GN=OSGEPL1 PE=2 SV=2	sp|A4SRB1|TSAD_AERS4 tRNA N6-adenosine threonylcarbamoyltransferase OS=Aeromonas salmonicida (strain A449) GN=tsaD PE=3 SV=1	Cytoplasmic Protein	4	90.2
Aeromonas	Proteobacteria	Aeromonas hydrophila	sp|O43252|PAPS1_HUMAN Bifunctional 3'-phosphoadenosine 5'-phosphosulfate synthase 1 OS=Homo sapiens GN=PAPSS1 PE=1 SV=2	sp|A0KP33|CYSC_AERHH Adenylyl-sulfate kinase OS=Aeromonas hydrophila subsp. hydrophila (strain ATCC 7966 / DSM 30187 / JCM 1027 / KCTC 2358 / NCIMB 9240) GN=cysC PE=3 SV=1	Cytoplasmic Protein	1	53.1
Aeromonas	Proteobacteria	Aeromonas salmonicida	sp|O43252|PAPS1_HUMAN Bifunctional 3'-phosphoadenosine 5'-phosphosulfate synthase 1 OS=Homo sapiens GN=PAPSS1 PE=1 SV=2	sp|A4SRG6|CYSC_AERS4 Adenylyl-sulfate kinase OS=Aeromonas salmonicida (strain A449) GN=cysC PE=3 SV=1	Cytoplasmic Protein	4	90.2
Aeromonas	Proteobacteria	Aeromonas hydrophila	sp|P07205|PGK2_HUMAN Phosphoglycerate kinase 2 OS=Homo sapiens GN=PGK2 PE=1 SV=3	sp|A0KGD3|PGK_AERHH Phosphoglycerate kinase OS=Aeromonas hydrophila subsp. hydrophila (strain ATCC 7966 / DSM 30187 / JCM 1027 / KCTC 2358 / NCIMB 9240) GN=pgk PE=3 SV=1	Cytoplasmic Protein	4	90.2
Aeromonas	Proteobacteria	Aeromonas salmonicida	sp|P07205|PGK2_HUMAN Phosphoglycerate kinase 2 OS=Homo sapiens GN=PGK2 PE=1 SV=3	sp|A4SRF1|PGK_AERS4 Phosphoglycerate kinase OS=Aeromonas salmonicida (strain A449) GN=pgk PE=3 SV=1	Cytoplasmic Protein	4	90.2
Aeromonas	Proteobacteria	Aeromonas salmonicida	sp|P12955|PEPD_HUMAN Xaa-Pro dipeptidase OS=Homo sapiens GN=PEPD PE=1 SV=3	sp|A4STF0|PEPQ_AERS4 Xaa-Pro dipeptidase OS=Aeromonas salmonicida (strain A449) GN=pepQ PE=3 SV=1	Cytoplasmic Protein	4	90.2
Aeromonas	Proteobacteria	Aeromonas hydrophila	sp|P12955|PEPD_HUMAN Xaa-Pro dipeptidase OS=Homo sapiens GN=PEPD PE=1 SV=3	sp|A0KEL3|PEPQ_AERHH Xaa-Pro dipeptidase OS=Aeromonas hydrophila subsp. hydrophila (strain ATCC 7966 / DSM 30187 / JCM 1027 / KCTC 2358 / NCIMB 9240) GN=pepQ PE=3 SV=1	Cytoplasmic Protein	1	53.1
Aeromonas	Proteobacteria	Aeromonas hydrophila	sp|Q9UBT6|POLK_HUMAN DNA polymerase kappa OS=Homo sapiens GN=POLK PE=1 SV=1	sp|A0KHD5|DPO4_AERHH DNA polymerase IV OS=Aeromonas hydrophila subsp. hydrophila (strain ATCC 7966 / DSM 30187 / JCM 1027 / KCTC 2358 / NCIMB 9240) GN=dinB PE=3 SV=1	Cytoplasmic Protein	1	53.1
Aeromonas	Proteobacteria	Aeromonas hydrophila	sp|P48147|PPCE_HUMAN Prolyl endopeptidase OS=Homo sapiens GN=PREP PE=1 SV=2	sp|Q06903|PPCE_AERHY Prolyl endopeptidase OS=Aeromonas hydrophila PE=1 SV=2	Cytoplasmic Protein	4	90.2
Aeromonas	Proteobacteria	Aeromonas salmonicida	sp|P31939|PUR9_HUMAN Bifunctional purine biosynthesis protein PURH OS=Homo sapiens GN=ATIC PE=1 SV=3	sp|A4SR98|PUR9_AERS4 Bifunctional purine biosynthesis protein PurH OS=Aeromonas salmonicida (strain A449) GN=purH PE=3 SV=1	Cytoplasmic Protein	4	90.2
Aeromonas	Proteobacteria	Aeromonas hydrophila	sp|P31939|PUR9_HUMAN Bifunctional purine biosynthesis protein PURH OS=Homo sapiens GN=ATIC PE=1 SV=3	sp|A0KGJ2|PUR9_AERHH Bifunctional purine biosynthesis protein PurH OS=Aeromonas hydrophila subsp. hydrophila (strain ATCC 7966 / DSM 30187 / JCM 1027 / KCTC 2358 / NCIMB 9240) GN=purH PE=3 SV=1	Cytoplasmic Protein	1	53.1
Aeromonas	Proteobacteria	Aeromonas hydrophila	sp|P22102|PUR2_HUMAN Trifunctional purine biosynthetic protein adenosine-3 OS=Homo sapiens GN=GART PE=1 SV=1	sp|A0KM24|PUR5_AERHH Phosphoribosylformylglycinamidine cyclo-ligase OS=Aeromonas hydrophila subsp. hydrophila (strain ATCC 7966 / DSM 30187 / JCM 1027 / KCTC 2358 / NCIMB 9240) GN=purM PE=3 SV=1	Cytoplasmic Protein	4	90.2
Aeromonas	Proteobacteria	Aeromonas salmonicida	sp|P22102|PUR2_HUMAN Trifunctional purine biosynthetic protein adenosine-3 OS=Homo sapiens GN=GART PE=1 SV=1	sp|A4SL28|PUR5_AERS4 Phosphoribosylformylglycinamidine cyclo-ligase OS=Aeromonas salmonicida (strain A449) GN=purM PE=3 SV=1	Cytoplasmic Protein	5	98.1
Aeromonas	Proteobacteria	Aeromonas hydrophila	sp|P17812|PYRG1_HUMAN CTP synthase 1 OS=Homo sapiens GN=CTPS1 PE=1 SV=2	sp|A0KGH2|PYRG_AERHH CTP synthase OS=Aeromonas hydrophila subsp. hydrophila (strain ATCC 7966 / DSM 30187 / JCM 1027 / KCTC 2358 / NCIMB 9240) GN=pyrG PE=3 SV=1	Cytoplasmic Protein	4	90.2
Aeromonas	Proteobacteria	Aeromonas salmonicida	sp|P17812|PYRG1_HUMAN CTP synthase 1 OS=Homo sapiens GN=CTPS1 PE=1 SV=2	sp|A4SRC2|PYRG_AERS4 CTP synthase OS=Aeromonas salmonicida (strain A449) GN=pyrG PE=3 SV=1	Cytoplasmic Protein	4	90.2
Aeromonas	Proteobacteria	Aeromonas salmonicida	sp|Q9UGC7|RF1ML_HUMAN Peptide chain release factor 1-like, mitochondrial OS=Homo sapiens GN=MTRF1L PE=1 SV=1	sp|A4SK64|RF1_AERS4 Peptide chain release factor 1 OS=Aeromonas salmonicida (strain A449) GN=prfA PE=3 SV=1	Cytoplasmic Protein	4	90.2
Aeromonas	Proteobacteria	Aeromonas hydrophila	sp|Q9UGC7|RF1ML_HUMAN Peptide chain release factor 1-like, mitochondrial OS=Homo sapiens GN=MTRF1L PE=1 SV=1	sp|A0KMZ8|RF1_AERHH Peptide chain release factor 1 OS=Aeromonas hydrophila subsp. hydrophila (strain ATCC 7966 / DSM 30187 / JCM 1027 / KCTC 2358 / NCIMB 9240) GN=prfA PE=3 SV=1	Cytoplasmic Protein	4	90.2
Aeromonas	Proteobacteria	Aeromonas hydrophila	sp|O00584|RNT2_HUMAN Ribonuclease T2 OS=Homo sapiens GN=RNASET2 PE=1 SV=2	sp|Q07465|RNI_AERHY Ribonuclease OS=Aeromonas hydrophila PE=3 SV=1	Cytoplasmic Protein	1	53.1
Aeromonas	Proteobacteria	Aeromonas salmonicida	sp|O95602|RPA1_HUMAN DNA-directed RNA polymerase I subunit RPA1 OS=Homo sapiens GN=POLR1A PE=1 SV=2	sp|A4SHV0|RPOC_AERS4 DNA-directed RNA polymerase subunit beta' OS=Aeromonas salmonicida (strain A449) GN=rpoC PE=3 SV=1	Cytoplasmic Protein	4	90.2
Aeromonas	Proteobacteria	Aeromonas hydrophila	sp|O95602|RPA1_HUMAN DNA-directed RNA polymerase I subunit RPA1 OS=Homo sapiens GN=POLR1A PE=1 SV=2	sp|A0KQA4|RPOC_AERHH DNA-directed RNA polymerase subunit beta' OS=Aeromonas hydrophila subsp. hydrophila (strain ATCC 7966 / DSM 30187 / JCM 1027 / KCTC 2358 / NCIMB 9240) GN=rpoC PE=3 SV=1	Cytoplasmic Protein	1	53.1
Aeromonas	Proteobacteria	Aeromonas salmonicida	sp|Q969S9|RRF2M_HUMAN Ribosome-releasing factor 2, mitochondrial OS=Homo sapiens GN=GFM2 PE=1 SV=1	sp|A4SHV8|EFG_AERS4 Elongation factor G OS=Aeromonas salmonicida (strain A449) GN=fusA PE=3 SV=2	Cytoplasmic Protein	4	90.2
Aeromonas	Proteobacteria	Aeromonas salmonicida	sp|P82912|RT11_HUMAN 28S ribosomal protein S11, mitochondrial OS=Homo sapiens GN=MRPS11 PE=1 SV=2	sp|A4SSY3|RS11_AERS4 30S ribosomal protein S11 OS=Aeromonas salmonicida (strain A449) GN=rpsK PE=3 SV=1	Cytoplasmic Protein	1	53.1
Aeromonas	Proteobacteria	Aeromonas hydrophila	sp|P82912|RT11_HUMAN 28S ribosomal protein S11, mitochondrial OS=Homo sapiens GN=MRPS11 PE=1 SV=2	sp|A0KF43|RS11_AERHH 30S ribosomal protein S11 OS=Aeromonas hydrophila subsp. hydrophila (strain ATCC 7966 / DSM 30187 / JCM 1027 / KCTC 2358 / NCIMB 9240) GN=rpsK PE=3 SV=1	Cytoplasmic Protein	4	90.2
Aeromonas	Proteobacteria	Aeromonas salmonicida	sp|Q9BVL4|SELO_HUMAN Selenoprotein O OS=Homo sapiens GN=SELO PE=2 SV=3	sp|A4SHK8|Y185_AERS4 UPF0061 protein ASA_0185 OS=Aeromonas salmonicida (strain A449) GN=ASA_0185 PE=3 SV=1	Cytoplasmic Protein	4	90.2
Aeromonas	Proteobacteria	Aeromonas salmonicida	sp|Q96I99|SUCB2_HUMAN Succinyl-CoA ligase [GDP-forming] subunit beta, mitochondrial OS=Homo sapiens GN=SUCLG2 PE=1 SV=2	sp|A4SND2|SUCC_AERS4 Succinyl-CoA ligase [ADP-forming] subunit beta OS=Aeromonas salmonicida (strain A449) GN=sucC PE=3 SV=1	Cytoplasmic Protein	4	90.2
Aeromonas	Proteobacteria	Aeromonas hydrophila	sp|Q96I99|SUCB2_HUMAN Succinyl-CoA ligase [GDP-forming] subunit beta, mitochondrial OS=Homo sapiens GN=SUCLG2 PE=1 SV=2	sp|A0KJK9|SUCC_AERHH Succinyl-CoA ligase [ADP-forming] subunit beta OS=Aeromonas hydrophila subsp. hydrophila (strain ATCC 7966 / DSM 30187 / JCM 1027 / KCTC 2358 / NCIMB 9240) GN=sucC PE=3 SV=1	Cytoplasmic Protein	1	53.1
Aeromonas	Proteobacteria	Aeromonas hydrophila	sp|P49588|SYAC_HUMAN Alanine--tRNA ligase, cytoplasmic OS=Homo sapiens GN=AARS PE=1 SV=2	sp|A0KPG1|SYA_AERHH Alanine--tRNA ligase OS=Aeromonas hydrophila subsp. hydrophila (strain ATCC 7966 / DSM 30187 / JCM 1027 / KCTC 2358 / NCIMB 9240) GN=alaS PE=3 SV=1	Cytoplasmic Protein	4	90.2
Aeromonas	Proteobacteria	Aeromonas salmonicida	sp|P49588|SYAC_HUMAN Alanine--tRNA ligase, cytoplasmic OS=Homo sapiens GN=AARS PE=1 SV=2	sp|A4SS99|SYA_AERS4 Alanine--tRNA ligase OS=Aeromonas salmonicida (strain A449) GN=alaS PE=3 SV=1	Cytoplasmic Protein	4	90.2
Aeromonas	Proteobacteria	Aeromonas salmonicida	sp|P12081|SYHC_HUMAN Histidine--tRNA ligase, cytoplasmic OS=Homo sapiens GN=HARS PE=1 SV=2	sp|A4SP01|SYH_AERS4 Histidine--tRNA ligase OS=Aeromonas salmonicida (strain A449) GN=hisS PE=3 SV=1	Cytoplasmic Protein	1	53.1
Aeromonas	Proteobacteria	Aeromonas hydrophila	sp|P12081|SYHC_HUMAN Histidine--tRNA ligase, cytoplasmic OS=Homo sapiens GN=HARS PE=1 SV=2	sp|A0KJ45|SYH_AERHH Histidine--tRNA ligase OS=Aeromonas hydrophila subsp. hydrophila (strain ATCC 7966 / DSM 30187 / JCM 1027 / KCTC 2358 / NCIMB 9240) GN=hisS PE=3 SV=1	Cytoplasmic Protein	1	53.1
Aeromonas	Proteobacteria	Aeromonas hydrophila	sp|Q15046|SYK_HUMAN Lysine--tRNA ligase OS=Homo sapiens GN=KARS PE=1 SV=3	sp|A0KNK7|SYK_AERHH Lysine--tRNA ligase OS=Aeromonas hydrophila subsp. hydrophila (strain ATCC 7966 / DSM 30187 / JCM 1027 / KCTC 2358 / NCIMB 9240) GN=lysS PE=3 SV=1	Cytoplasmic Protein	4	90.2
Aeromonas	Proteobacteria	Aeromonas salmonicida	sp|Q15046|SYK_HUMAN Lysine--tRNA ligase OS=Homo sapiens GN=KARS PE=1 SV=3	sp|A4SJK0|SYK_AERS4 Lysine--tRNA ligase OS=Aeromonas salmonicida (strain A449) GN=lysS PE=3 SV=1	Cytoplasmic Protein	4	90.2
Aeromonas	Proteobacteria	Aeromonas hydrophila	sp|Q96I59|SYNM_HUMAN Probable asparagine--tRNA ligase, mitochondrial OS=Homo sapiens GN=NARS2 PE=1 SV=3	sp|A0KIC3|SYN_AERHH Asparagine--tRNA ligase OS=Aeromonas hydrophila subsp. hydrophila (strain ATCC 7966 / DSM 30187 / JCM 1027 / KCTC 2358 / NCIMB 9240) GN=asnS PE=3 SV=1	Cytoplasmic Protein	1	53.1
Aeromonas	Proteobacteria	Aeromonas salmonicida	sp|Q15031|SYLM_HUMAN Probable leucine--tRNA ligase, mitochondrial OS=Homo sapiens GN=LARS2 PE=1 SV=2	sp|A4SJW8|SYL_AERS4 Leucine--tRNA ligase OS=Aeromonas salmonicida (strain A449) GN=leuS PE=3 SV=1	Cytoplasmic Protein	3	71.1
Aeromonas	Proteobacteria	Aeromonas hydrophila	sp|Q15031|SYLM_HUMAN Probable leucine--tRNA ligase, mitochondrial OS=Homo sapiens GN=LARS2 PE=1 SV=2	sp|A0KN87|SYL_AERHH Leucine--tRNA ligase OS=Aeromonas hydrophila subsp. hydrophila (strain ATCC 7966 / DSM 30187 / JCM 1027 / KCTC 2358 / NCIMB 9240) GN=leuS PE=3 SV=2	Cytoplasmic Protein	4	90.2
Aeromonas	Proteobacteria	Aeromonas hydrophila	sp|A2RTX5|SYTC2_HUMAN Probable threonine--tRNA ligase 2, cytoplasmic OS=Homo sapiens GN=TARSL2 PE=1 SV=1	sp|A0KKP9|SYT_AERHH Threonine--tRNA ligase OS=Aeromonas hydrophila subsp. hydrophila (strain ATCC 7966 / DSM 30187 / JCM 1027 / KCTC 2358 / NCIMB 9240) GN=thrS PE=3 SV=1	Cytoplasmic Protein	4	90.2
Aeromonas	Proteobacteria	Aeromonas salmonicida	sp|A2RTX5|SYTC2_HUMAN Probable threonine--tRNA ligase 2, cytoplasmic OS=Homo sapiens GN=TARSL2 PE=1 SV=1	sp|A4SMA4|SYT_AERS4 Threonine--tRNA ligase OS=Aeromonas salmonicida (strain A449) GN=thrS PE=3 SV=1	Cytoplasmic Protein	4	90.2
Aeromonas	Proteobacteria	Aeromonas hydrophila	sp|P41252|SYIC_HUMAN Isoleucine--tRNA ligase, cytoplasmic OS=Homo sapiens GN=IARS PE=1 SV=2	sp|A0KG39|SYI_AERHH Isoleucine--tRNA ligase OS=Aeromonas hydrophila subsp. hydrophila (strain ATCC 7966 / DSM 30187 / JCM 1027 / KCTC 2358 / NCIMB 9240) GN=ileS PE=3 SV=1	Cytoplasmic Protein	4	90.2
Aeromonas	Proteobacteria	Aeromonas salmonicida	sp|P41252|SYIC_HUMAN Isoleucine--tRNA ligase, cytoplasmic OS=Homo sapiens GN=IARS PE=1 SV=2	sp|A4SIX5|SYI_AERS4 Isoleucine--tRNA ligase OS=Aeromonas salmonicida (strain A449) GN=ileS PE=3 SV=1	Cytoplasmic Protein	4	90.2
Aeromonas	Proteobacteria	Aeromonas salmonicida	sp|P37837|TALDO_HUMAN Transaldolase OS=Homo sapiens GN=TALDO1 PE=1 SV=2	sp|A4SK74|TAL_AERS4 Transaldolase OS=Aeromonas salmonicida (strain A449) GN=tal PE=3 SV=1	Cytoplasmic Protein	4	90.2
Aeromonas	Proteobacteria	Aeromonas hydrophila	sp|Q5JPH6|SYEM_HUMAN Probable glutamate--tRNA ligase, mitochondrial OS=Homo sapiens GN=EARS2 PE=1 SV=2	sp|A0KNT0|SYE_AERHH Glutamate--tRNA ligase OS=Aeromonas hydrophila subsp. hydrophila (strain ATCC 7966 / DSM 30187 / JCM 1027 / KCTC 2358 / NCIMB 9240) GN=gltX PE=3 SV=1	Cytoplasmic Protein	1	53.1
Aeromonas	Proteobacteria	Aeromonas salmonicida	sp|Q5JPH6|SYEM_HUMAN Probable glutamate--tRNA ligase, mitochondrial OS=Homo sapiens GN=EARS2 PE=1 SV=2	sp|A4SJD4|SYE_AERS4 Glutamate--tRNA ligase OS=Aeromonas salmonicida (strain A449) GN=gltX PE=3 SV=1	Cytoplasmic Protein	1	53.1
Aeromonas	Proteobacteria	Aeromonas hydrophila	sp|Q9BWD1|THIC_HUMAN Acetyl-CoA acetyltransferase, cytosolic OS=Homo sapiens GN=ACAT2 PE=1 SV=2	sp|A0KEL0|FADA_AERHH 3-ketoacyl-CoA thiolase OS=Aeromonas hydrophila subsp. hydrophila (strain ATCC 7966 / DSM 30187 / JCM 1027 / KCTC 2358 / NCIMB 9240) GN=fadA PE=3 SV=1	Cytoplasmic Protein	4	90.2
Aeromonas	Proteobacteria	Aeromonas salmonicida	sp|Q9BWD1|THIC_HUMAN Acetyl-CoA acetyltransferase, cytosolic OS=Homo sapiens GN=ACAT2 PE=1 SV=2	sp|A4STF3|FADA_AERS4 3-ketoacyl-CoA thiolase OS=Aeromonas salmonicida (strain A449) GN=fadA PE=3 SV=1	Cytoplasmic Protein	4	90.2
Aeromonas	Proteobacteria	Aeromonas hydrophila	sp|Q9BXR0|TGT_HUMAN Queuine tRNA-ribosyltransferase OS=Homo sapiens GN=QTRT1 PE=1 SV=3	sp|A0KJ20|TGT_AERHH Queuine tRNA-ribosyltransferase OS=Aeromonas hydrophila subsp. hydrophila (strain ATCC 7966 / DSM 30187 / JCM 1027 / KCTC 2358 / NCIMB 9240) GN=tgt PE=3 SV=1	Cytoplasmic Protein	4	90.2
Aeromonas	Proteobacteria	Aeromonas salmonicida	sp|Q9BXR0|TGT_HUMAN Queuine tRNA-ribosyltransferase OS=Homo sapiens GN=QTRT1 PE=1 SV=3	sp|A4SP26|TGT_AERS4 Queuine tRNA-ribosyltransferase OS=Aeromonas salmonicida (strain A449) GN=tgt PE=3 SV=1	Cytoplasmic Protein	4	90.2
Aeromonas	Proteobacteria	Aeromonas hydrophila	sp|P19971|TYPH_HUMAN Thymidine phosphorylase OS=Homo sapiens GN=TYMP PE=1 SV=2	sp|A0KPE3|TYPH_AERHH Thymidine phosphorylase OS=Aeromonas hydrophila subsp. hydrophila (strain ATCC 7966 / DSM 30187 / JCM 1027 / KCTC 2358 / NCIMB 9240) GN=deoA PE=3 SV=1	Cytoplasmic Protein	4	90.2
Aeromonas	Proteobacteria	Aeromonas salmonicida	sp|P19971|TYPH_HUMAN Thymidine phosphorylase OS=Homo sapiens GN=TYMP PE=1 SV=2	sp|A4SRU3|TYPH_AERS4 Thymidine phosphorylase OS=Aeromonas salmonicida (strain A449) GN=deoA PE=3 SV=1	Cytoplasmic Protein	4	90.2
Aeromonas	Proteobacteria	Aeromonas hydrophila	sp|P04818|TYSY_HUMAN Thymidylate synthase OS=Homo sapiens GN=TYMS PE=1 SV=3	sp|A0KG32|TYSY_AERHH Thymidylate synthase OS=Aeromonas hydrophila subsp. hydrophila (strain ATCC 7966 / DSM 30187 / JCM 1027 / KCTC 2358 / NCIMB 9240) GN=thyA PE=3 SV=1	Cytoplasmic Protein	4	90.2
Aeromonas	Proteobacteria	Aeromonas salmonicida	sp|P04818|TYSY_HUMAN Thymidylate synthase OS=Homo sapiens GN=TYMS PE=1 SV=3	sp|A4SIW7|TYSY_AERS4 Thymidylate synthase OS=Aeromonas salmonicida (strain A449) GN=thyA PE=3 SV=1	Cytoplasmic Protein	4	90.2
Aeromonas	Proteobacteria	Aeromonas hydrophila	sp|P13051|UNG_HUMAN Uracil-DNA glycosylase OS=Homo sapiens GN=UNG PE=1 SV=2	sp|A0KMZ1|UNG_AERHH Uracil-DNA glycosylase OS=Aeromonas hydrophila subsp. hydrophila (strain ATCC 7966 / DSM 30187 / JCM 1027 / KCTC 2358 / NCIMB 9240) GN=ung PE=3 SV=1	Cytoplasmic Protein	4	90.2
Aeromonas	Proteobacteria	Aeromonas salmonicida	sp|P13051|UNG_HUMAN Uracil-DNA glycosylase OS=Homo sapiens GN=UNG PE=1 SV=2	sp|A4SK71|UNG_AERS4 Uracil-DNA glycosylase OS=Aeromonas salmonicida (strain A449) GN=ung PE=3 SV=1	Cytoplasmic Protein	3	71.1
Aggregatibacter	Proteobacteria	Aggregatibacter actinomycetemcomitans	sp|P52209|6PGD_HUMAN 6-phosphogluconate dehydrogenase, decarboxylating OS=Homo sapiens GN=PGD PE=1 SV=3	sp|P70718|6PGD_AGGAC 6-phosphogluconate dehydrogenase, decarboxylating OS=Aggregatibacter actinomycetemcomitans GN=gnd PE=3 SV=1	Cytoplasmic Protein	4	90.2
Aggregatibacter	Proteobacteria	Aggregatibacter actinomycetemcomitans	sp|Q9NUT2|ABCB8_HUMAN ATP-binding cassette sub-family B member 8, mitochondrial OS=Homo sapiens GN=ABCB8 PE=1 SV=3	sp|P23702|LTXB_AGGAC Leukotoxin export ATP-binding protein LtxB OS=Aggregatibacter actinomycetemcomitans GN=ltxB PE=1 SV=1	Cytoplasmic Protein	4	90.2
Aggregatibacter	Proteobacteria	Aggregatibacter actinomycetemcomitans	sp|P10809|CH60_HUMAN 60 kDa heat shock protein, mitochondrial OS=Homo sapiens GN=HSPD1 PE=1 SV=2	sp|P46398|CH60_AGGAC 60 kDa chaperonin OS=Aggregatibacter actinomycetemcomitans GN=groL PE=1 SV=3	Cytoplasmic Protein	4	90.2
Aggregatibacter	Proteobacteria	Aggregatibacter actinomycetemcomitans	sp|P14625|ENPL_HUMAN Endoplasmin OS=Homo sapiens GN=HSP90B1 PE=1 SV=1	sp|P54649|HTPG_AGGAC Chaperone protein HtpG OS=Aggregatibacter actinomycetemcomitans GN=htpG PE=3 SV=1	Cytoplasmic Protein	4	90.2
Aggregatibacter	Proteobacteria	Aggregatibacter actinomycetemcomitans	sp|P11413|G6PD_HUMAN Glucose-6-phosphate 1-dehydrogenase OS=Homo sapiens GN=G6PD PE=1 SV=4	sp|P77809|G6PD_AGGAC Glucose-6-phosphate 1-dehydrogenase OS=Aggregatibacter actinomycetemcomitans GN=zwf PE=3 SV=1	Cytoplasmic Protein	1	53.1
Aggregatibacter	Proteobacteria	Aggregatibacter actinomycetemcomitans	sp|O95479|G6PE_HUMAN GDH/6PGL endoplasmic bifunctional protein OS=Homo sapiens GN=H6PD PE=1 SV=2	sp|P70715|6PGL_AGGAC 6-phosphogluconolactonase OS=Aggregatibacter actinomycetemcomitans GN=pgl PE=3 SV=2	Cytoplasmic Protein	4	90.2
Aggregatibacter	Proteobacteria	Aggregatibacter actinomycetemcomitans	sp|O60547|GMDS_HUMAN GDP-mannose 4,6 dehydratase OS=Homo sapiens GN=GMDS PE=1 SV=1	sp|Q9JRN5|GM4D_AGGAC GDP-mannose 4,6-dehydratase OS=Aggregatibacter actinomycetemcomitans GN=gmd PE=1 SV=1	Cytoplasmic Protein	4	90.2
Aggregatibacter	Proteobacteria	Aggregatibacter actinomycetemcomitans	sp|P11021|GRP78_HUMAN 78 kDa glucose-regulated protein OS=Homo sapiens GN=HSPA5 PE=1 SV=2	sp|P71331|DNAK_AGGAC Chaperone protein DnaK OS=Aggregatibacter actinomycetemcomitans GN=dnaK PE=3 SV=3	Cytoplasmic Protein	4	90.2
Aggregatibacter	Proteobacteria	Aggregatibacter aphrophilus	sp|A6NJ78|MET15_HUMAN Probable methyltransferase-like protein 15 OS=Homo sapiens GN=METTL15 PE=1 SV=1	sp|C6AKG2|RSMH_AGGAN Ribosomal RNA small subunit methyltransferase H OS=Aggregatibacter aphrophilus (strain NJ8700) GN=rsmH PE=3 SV=1	Cytoplasmic Protein	4	90.2
Akkermansia	Verrucomicrobia	Akkermansia muciniphila	sp|Q9Y4W6|AFG32_HUMAN AFG3-like protein 2 OS=Homo sapiens GN=AFG3L2 PE=1 SV=2	sp|B2UMY1|FTSH_AKKM8 ATP-dependent zinc metalloprotease FtsH OS=Akkermansia muciniphila (strain ATCC BAA-835 / Muc) GN=ftsH PE=3 SV=1	Cytoplasmic Protein	4	90.2
Akkermansia	Verrucomicrobia	Akkermansia muciniphila	sp|P11586|C1TC_HUMAN C-1-tetrahydrofolate synthase, cytoplasmic OS=Homo sapiens GN=MTHFD1 PE=1 SV=3	sp|B2UM17|FOLD_AKKM8 Bifunctional protein FolD OS=Akkermansia muciniphila (strain ATCC BAA-835 / Muc) GN=folD PE=3 SV=1	Cytoplasmic Protein	5	98.1
Akkermansia	Verrucomicrobia	Akkermansia muciniphila	sp|Q8WVB6|CTF18_HUMAN Chromosome transmission fidelity protein 18 homolog OS=Homo sapiens GN=CHTF18 PE=1 SV=1	sp|B2UPI9|RUVB_AKKM8 Holliday junction ATP-dependent DNA helicase RuvB OS=Akkermansia muciniphila (strain ATCC BAA-835 / Muc) GN=ruvB PE=3 SV=1	Cytoplasmic Protein	1	53.1
Akkermansia	Verrucomicrobia	Akkermansia muciniphila	sp|P49411|EFTU_HUMAN Elongation factor Tu, mitochondrial OS=Homo sapiens GN=TUFM PE=1 SV=2	sp|B2UQY9|EFTU_AKKM8 Elongation factor Tu OS=Akkermansia muciniphila (strain ATCC BAA-835 / Muc) GN=tuf PE=3 SV=1	Cytoplasmic Protein	4	90.2
Akkermansia	Verrucomicrobia	Akkermansia muciniphila	sp|Q9H0R6|GATA_HUMAN Glutamyl-tRNA(Gln) amidotransferase subunit A, mitochondrial OS=Homo sapiens GN=QRSL1 PE=1 SV=2	sp|B2UMP4|GATA_AKKM8 Glutamyl-tRNA(Gln) amidotransferase subunit A OS=Akkermansia muciniphila (strain ATCC BAA-835 / Muc) GN=gatA PE=3 SV=1	Cytoplasmic Protein	4	90.2
Akkermansia	Verrucomicrobia	Akkermansia muciniphila	sp|P23378|GCSP_HUMAN Glycine dehydrogenase (decarboxylating), mitochondrial OS=Homo sapiens GN=GLDC PE=1 SV=2	sp|B2UNH4|GCSP_AKKM8 Glycine dehydrogenase (decarboxylating) OS=Akkermansia muciniphila (strain ATCC BAA-835 / Muc) GN=gcvP PE=3 SV=1	Cytoplasmic Protein	1	53.1
Akkermansia	Verrucomicrobia	Akkermansia muciniphila	sp|P11021|GRP78_HUMAN 78 kDa glucose-regulated protein OS=Homo sapiens GN=HSPA5 PE=1 SV=2	sp|B2UKV6|DNAK_AKKM8 Chaperone protein DnaK OS=Akkermansia muciniphila (strain ATCC BAA-835 / Muc) GN=dnaK PE=3 SV=1	Cytoplasmic Protein	4	90.2
Akkermansia	Verrucomicrobia	Akkermansia muciniphila	sp|P40925|MDHC_HUMAN Malate dehydrogenase, cytoplasmic OS=Homo sapiens GN=MDH1 PE=1 SV=4	sp|B2UKY5|MDH_AKKM8 Malate dehydrogenase OS=Akkermansia muciniphila (strain ATCC BAA-835 / Muc) GN=mdh PE=3 SV=1	Cytoplasmic Protein	4	90.2
Akkermansia	Verrucomicrobia	Akkermansia muciniphila	sp|Q9H4K7|MTG2_HUMAN Mitochondrial ribosome-associated GTPase 2 OS=Homo sapiens GN=MTG2 PE=1 SV=1	sp|B2UQ30|OBG_AKKM8 GTPase Obg OS=Akkermansia muciniphila (strain ATCC BAA-835 / Muc) GN=obg PE=3 SV=2	Cytoplasmic Protein	4	90.2
Akkermansia	Verrucomicrobia	Akkermansia muciniphila	sp|O75306|NDUS2_HUMAN NADH dehydrogenase [ubiquinone] iron-sulfur protein 2, mitochondrial OS=Homo sapiens GN=NDUFS2 PE=1 SV=2	sp|B2ULZ0|NUOD_AKKM8 NADH-quinone oxidoreductase subunit D OS=Akkermansia muciniphila (strain ATCC BAA-835 / Muc) GN=nuoD PE=3 SV=1	Cytoplasmic Protein	4	90.2
Akkermansia	Verrucomicrobia	Akkermansia muciniphila	sp|P07205|PGK2_HUMAN Phosphoglycerate kinase 2 OS=Homo sapiens GN=PGK2 PE=1 SV=3	sp|B2UKW8|PGK_AKKM8 Phosphoglycerate kinase OS=Akkermansia muciniphila (strain ATCC BAA-835 / Muc) GN=pgk PE=3 SV=1	Cytoplasmic Protein	1	53.1
Akkermansia	Verrucomicrobia	Akkermansia muciniphila	sp|Q13670|PM2PB_HUMAN Putative postmeiotic segregation increased 2-like protein 11 OS=Homo sapiens GN=PMS2P11 PE=5 SV=1	sp|B2ULE2|MUTL_AKKM8 DNA mismatch repair protein MutL OS=Akkermansia muciniphila (strain ATCC BAA-835 / Muc) GN=mutL PE=3 SV=1	Cytoplasmic Protein	1	53.1
Akkermansia	Verrucomicrobia	Akkermansia muciniphila	sp|Q8N0Z8|PUSL1_HUMAN tRNA pseudouridine synthase-like 1 OS=Homo sapiens GN=PUSL1 PE=1 SV=1	sp|B2UNB6|TRUA_AKKM8 tRNA pseudouridine synthase A OS=Akkermansia muciniphila (strain ATCC BAA-835 / Muc) GN=truA PE=3 SV=1	Cytoplasmic Protein	1	53.1
Akkermansia	Verrucomicrobia	Akkermansia muciniphila	sp|P27708|PYR1_HUMAN CAD protein OS=Homo sapiens GN=CAD PE=1 SV=3	sp|B2URJ0|CARA_AKKM8 Carbamoyl-phosphate synthase small chain OS=Akkermansia muciniphila (strain ATCC BAA-835 / Muc) GN=carA PE=3 SV=1	Cytoplasmic Protein	4	90.2
Akkermansia	Verrucomicrobia	Akkermansia muciniphila	sp|Q02127|PYRD_HUMAN Dihydroorotate dehydrogenase (quinone), mitochondrial OS=Homo sapiens GN=DHODH PE=1 SV=3	sp|B2UNA2|PYRD_AKKM8 Dihydroorotate dehydrogenase (quinone) OS=Akkermansia muciniphila (strain ATCC BAA-835 / Muc) GN=pyrD PE=3 SV=1	Cytoplasmic Protein	4	90.2
Akkermansia	Verrucomicrobia	Akkermansia muciniphila	sp|Q9UGC7|RF1ML_HUMAN Peptide chain release factor 1-like, mitochondrial OS=Homo sapiens GN=MTRF1L PE=1 SV=1	sp|B2UL99|RF1_AKKM8 Peptide chain release factor 1 OS=Akkermansia muciniphila (strain ATCC BAA-835 / Muc) GN=prfA PE=3 SV=1	Cytoplasmic Protein	4	90.2
Akkermansia	Verrucomicrobia	Akkermansia muciniphila	sp|O95602|RPA1_HUMAN DNA-directed RNA polymerase I subunit RPA1 OS=Homo sapiens GN=POLR1A PE=1 SV=2	sp|B2UQY1|RPOC_AKKM8 DNA-directed RNA polymerase subunit beta' OS=Akkermansia muciniphila (strain ATCC BAA-835 / Muc) GN=rpoC PE=3 SV=1	Cytoplasmic Protein	4	90.2
Akkermansia	Verrucomicrobia	Akkermansia muciniphila	sp|Q96I99|SUCB2_HUMAN Succinyl-CoA ligase [GDP-forming] subunit beta, mitochondrial OS=Homo sapiens GN=SUCLG2 PE=1 SV=2	sp|B2UMH5|SUCC_AKKM8 Succinyl-CoA ligase [ADP-forming] subunit beta OS=Akkermansia muciniphila (strain ATCC BAA-835 / Muc) GN=sucC PE=3 SV=1	Cytoplasmic Protein	4	90.2
Akkermansia	Verrucomicrobia	Akkermansia muciniphila	sp|P49588|SYAC_HUMAN Alanine--tRNA ligase, cytoplasmic OS=Homo sapiens GN=AARS PE=1 SV=2	sp|B2UKT4|SYA_AKKM8 Alanine--tRNA ligase OS=Akkermansia muciniphila (strain ATCC BAA-835 / Muc) GN=alaS PE=3 SV=1	Cytoplasmic Protein	1	53.1
Aneurinibacillus	Firmicutes	Aneurinibacillus migulanus	sp|Q96GR2|ACBG1_HUMAN Long-chain-fatty-acid--CoA ligase ACSBG1 OS=Homo sapiens GN=ACSBG1 PE=2 SV=2	sp|P0C061|GRSA_ANEMI Gramicidin S synthase 1 OS=Aneurinibacillus migulanus GN=grsA PE=1 SV=1	Cytoplasmic Protein	1	53.1
Aneurinibacillus	Firmicutes	Aneurinibacillus migulanus	sp|Q9NR19|ACSA_HUMAN Acetyl-coenzyme A synthetase, cytoplasmic OS=Homo sapiens GN=ACSS2 PE=1 SV=1	sp|P0C063|GRSB_ANEMI Gramicidin S synthase 2 OS=Aneurinibacillus migulanus GN=grsB PE=3 SV=2	Cytoplasmic Protein	1	53.1
Arcobacter	Proteobacteria	Arcobacter butzleri	sp|P00966|ASSY_HUMAN Argininosuccinate synthase OS=Homo sapiens GN=ASS1 PE=1 SV=2	sp|A8EUB2|ASSY_ARCB4 Argininosuccinate synthase OS=Arcobacter butzleri (strain RM4018) GN=argG PE=3 SV=1	Cytoplasmic Protein	4	90.2
Arcobacter	Proteobacteria	Arcobacter butzleri	sp|P25705|ATPA_HUMAN ATP synthase subunit alpha, mitochondrial OS=Homo sapiens GN=ATP5A1 PE=1 SV=1	sp|A8EV72|ATPA_ARCB4 ATP synthase subunit alpha OS=Arcobacter butzleri (strain RM4018) GN=atpA PE=3 SV=1	Cytoplasmic Protein	5	98.1
Arcobacter	Proteobacteria	Arcobacter butzleri	sp|P06576|ATPB_HUMAN ATP synthase subunit beta, mitochondrial OS=Homo sapiens GN=ATP5B PE=1 SV=3	sp|A8EV70|ATPB_ARCB4 ATP synthase subunit beta OS=Arcobacter butzleri (strain RM4018) GN=atpD PE=3 SV=1	Cytoplasmic Protein	5	98.1
Arcobacter	Proteobacteria	Arcobacter butzleri	sp|P10809|CH60_HUMAN 60 kDa heat shock protein, mitochondrial OS=Homo sapiens GN=HSPD1 PE=1 SV=2	sp|A8ERY3|CH60_ARCB4 60 kDa chaperonin OS=Arcobacter butzleri (strain RM4018) GN=groL PE=3 SV=1	Cytoplasmic Protein	1	53.1
Arcobacter	Proteobacteria	Arcobacter butzleri	sp|Q96SZ6|CK5P1_HUMAN CDK5 regulatory subunit-associated protein 1 OS=Homo sapiens GN=CDK5RAP1 PE=1 SV=2	sp|A8ERE9|MIAB_ARCB4 tRNA-2-methylthio-N(6)-dimethylallyladenosine synthase OS=Arcobacter butzleri (strain RM4018) GN=miaB PE=3 SV=1	Cytoplasmic Protein	4	90.2
Arcobacter	Proteobacteria	Arcobacter butzleri	sp|Q16740|CLPP_HUMAN ATP-dependent Clp protease proteolytic subunit, mitochondrial OS=Homo sapiens GN=CLPP PE=1 SV=1	sp|A8EVH5|CLPP_ARCB4 ATP-dependent Clp protease proteolytic subunit OS=Arcobacter butzleri (strain RM4018) GN=clpP PE=3 SV=1	Cytoplasmic Protein	4	90.2
Arcobacter	Proteobacteria	Arcobacter butzleri	sp|Q8WVB6|CTF18_HUMAN Chromosome transmission fidelity protein 18 homolog OS=Homo sapiens GN=CHTF18 PE=1 SV=1	sp|A8EVP9|RUVB_ARCB4 Holliday junction ATP-dependent DNA helicase RuvB OS=Arcobacter butzleri (strain RM4018) GN=ruvB PE=3 SV=1	Cytoplasmic Protein	4	90.2
Arcobacter	Proteobacteria	Arcobacter butzleri	sp|P06132|DCUP_HUMAN Uroporphyrinogen decarboxylase OS=Homo sapiens GN=UROD PE=1 SV=2	sp|A8EVQ3|DCUP_ARCB4 Uroporphyrinogen decarboxylase OS=Arcobacter butzleri (strain RM4018) GN=hemE PE=3 SV=1	Cytoplasmic Protein	4	90.2
Arcobacter	Proteobacteria	Arcobacter butzleri	sp|P14625|ENPL_HUMAN Endoplasmin OS=Homo sapiens GN=HSP90B1 PE=1 SV=1	sp|A8EV23|HTPG_ARCB4 Chaperone protein HtpG OS=Arcobacter butzleri (strain RM4018) GN=htpG PE=3 SV=1	Cytoplasmic Protein	1	53.1
Arcobacter	Proteobacteria	Arcobacter butzleri	sp|P49411|EFTU_HUMAN Elongation factor Tu, mitochondrial OS=Homo sapiens GN=TUFM PE=1 SV=2	sp|A8EW02|EFTU_ARCB4 Elongation factor Tu OS=Arcobacter butzleri (strain RM4018) GN=tuf PE=3 SV=1	Cytoplasmic Protein	4	90.2
Arcobacter	Proteobacteria	Arcobacter butzleri	sp|P11021|GRP78_HUMAN 78 kDa glucose-regulated protein OS=Homo sapiens GN=HSPA5 PE=1 SV=2	sp|A8EWT6|DNAK_ARCB4 Chaperone protein DnaK OS=Arcobacter butzleri (strain RM4018) GN=dnaK PE=3 SV=1	Cytoplasmic Protein	4	90.2
Arcobacter	Proteobacteria	Arcobacter butzleri	sp|A4D1E9|GTPBA_HUMAN GTP-binding protein 10 OS=Homo sapiens GN=GTPBP10 PE=1 SV=1	sp|A8EV83|OBG_ARCB4 GTPase Obg OS=Arcobacter butzleri (strain RM4018) GN=obg PE=3 SV=1	Cytoplasmic Protein	4	90.2
Arcobacter	Proteobacteria	Arcobacter butzleri	sp|P49915|GUAA_HUMAN GMP synthase [glutamine-hydrolyzing] OS=Homo sapiens GN=GMPS PE=1 SV=1	sp|A8ETA7|GUAA_ARCB4 GMP synthase [glutamine-hydrolyzing] OS=Arcobacter butzleri (strain RM4018) GN=guaA PE=3 SV=1	Cytoplasmic Protein	4	90.2
Arcobacter	Proteobacteria	Arcobacter butzleri	sp|P13995|MTDC_HUMAN Bifunctional methylenetetrahydrofolate dehydrogenase/cyclohydrolase, mitochondrial OS=Homo sapiens GN=MTHFD2 PE=1 SV=2	sp|A8ESH8|FOLD_ARCB4 Bifunctional protein FolD OS=Arcobacter butzleri (strain RM4018) GN=folD PE=3 SV=1	Cytoplasmic Protein	4	90.2
Arcobacter	Proteobacteria	Arcobacter butzleri	sp|Q9Y2Z2|MTO1_HUMAN Protein MTO1 homolog, mitochondrial OS=Homo sapiens GN=MTO1 PE=1 SV=2	sp|A8EWV0|MNMG_ARCB4 tRNA uridine 5-carboxymethylaminomethyl modification enzyme MnmG OS=Arcobacter butzleri (strain RM4018) GN=mnmG PE=3 SV=1	Cytoplasmic Protein	4	90.2
Arcobacter	Proteobacteria	Arcobacter butzleri	sp|P54886|P5CS_HUMAN Delta-1-pyrroline-5-carboxylate synthase OS=Homo sapiens GN=ALDH18A1 PE=1 SV=2	sp|A8EVN0|PROA_ARCB4 Gamma-glutamyl phosphate reductase OS=Arcobacter butzleri (strain RM4018) GN=proA PE=3 SV=1	Cytoplasmic Protein	1	53.1
Arcobacter	Proteobacteria	Arcobacter butzleri	sp|P07205|PGK2_HUMAN Phosphoglycerate kinase 2 OS=Homo sapiens GN=PGK2 PE=1 SV=3	sp|A8EWM4|PGK_ARCB4 Phosphoglycerate kinase OS=Arcobacter butzleri (strain RM4018) GN=pgk PE=3 SV=1	Cytoplasmic Protein	4	90.2
Arcobacter	Proteobacteria	Arcobacter butzleri	sp|Q8N142|PURA1_HUMAN Adenylosuccinate synthetase isozyme 1 OS=Homo sapiens GN=ADSSL1 PE=1 SV=1	sp|A8ER43|PURA_ARCB4 Adenylosuccinate synthetase OS=Arcobacter butzleri (strain RM4018) GN=purA PE=3 SV=1	Cytoplasmic Protein	1	53.1
Arcobacter	Proteobacteria	Arcobacter butzleri	sp|Q9NRR4|RNC_HUMAN Ribonuclease 3 OS=Homo sapiens GN=DROSHA PE=1 SV=2	sp|A8EV88|RNC_ARCB4 Ribonuclease 3 OS=Arcobacter butzleri (strain RM4018) GN=rnc PE=3 SV=1	Cytoplasmic Protein	4	90.2
Arcobacter	Proteobacteria	Arcobacter butzleri	sp|Q969S9|RRF2M_HUMAN Ribosome-releasing factor 2, mitochondrial OS=Homo sapiens GN=GFM2 PE=1 SV=1	sp|A8EW86|EFG_ARCB4 Elongation factor G OS=Arcobacter butzleri (strain RM4018) GN=fusA PE=3 SV=1	Cytoplasmic Protein	4	90.2
Arcobacter	Proteobacteria	Arcobacter butzleri	sp|P49588|SYAC_HUMAN Alanine--tRNA ligase, cytoplasmic OS=Homo sapiens GN=AARS PE=1 SV=2	sp|A8EWI6|SYA_ARCB4 Alanine--tRNA ligase OS=Arcobacter butzleri (strain RM4018) GN=alaS PE=3 SV=1	Cytoplasmic Protein	4	90.2
Arcobacter	Proteobacteria	Arcobacter butzleri	sp|Q15046|SYK_HUMAN Lysine--tRNA ligase OS=Homo sapiens GN=KARS PE=1 SV=3	sp|A8ESJ5|SYK_ARCB4 Lysine--tRNA ligase OS=Arcobacter butzleri (strain RM4018) GN=lysS PE=3 SV=1	Cytoplasmic Protein	4	90.2
Arcobacter	Proteobacteria	Arcobacter butzleri	sp|Q15031|SYLM_HUMAN Probable leucine--tRNA ligase, mitochondrial OS=Homo sapiens GN=LARS2 PE=1 SV=2	sp|A8ERV3|SYL_ARCB4 Leucine--tRNA ligase OS=Arcobacter butzleri (strain RM4018) GN=leuS PE=3 SV=1	Cytoplasmic Protein	4	90.2
Arcobacter	Proteobacteria	Arcobacter butzleri	sp|P41252|SYIC_HUMAN Isoleucine--tRNA ligase, cytoplasmic OS=Homo sapiens GN=IARS PE=1 SV=2	sp|A8ES62|SYI_ARCB4 Isoleucine--tRNA ligase OS=Arcobacter butzleri (strain RM4018) GN=ileS PE=3 SV=1	Cytoplasmic Protein	1	53.1
Arcobacter	Proteobacteria	Arcobacter butzleri	sp|Q9BXR0|TGT_HUMAN Queuine tRNA-ribosyltransferase OS=Homo sapiens GN=QTRT1 PE=1 SV=3	sp|A8ERD1|TGT_ARCB4 Queuine tRNA-ribosyltransferase OS=Arcobacter butzleri (strain RM4018) GN=tgt PE=3 SV=1	Cytoplasmic Protein	1	53.1
Arcobacter	Proteobacteria	Arcobacter butzleri	sp|P13051|UNG_HUMAN Uracil-DNA glycosylase OS=Homo sapiens GN=UNG PE=1 SV=2	sp|A8EWN8|UNG_ARCB4 Uracil-DNA glycosylase OS=Arcobacter butzleri (strain RM4018) GN=ung PE=3 SV=1	Cytoplasmic Protein	4	90.2
Bacillus	Firmicutes	Bacillus subtilis	sp|P52209|6PGD_HUMAN 6-phosphogluconate dehydrogenase, decarboxylating OS=Homo sapiens GN=PGD PE=1 SV=3	sp|P80859|6PGD_BACSU 6-phosphogluconate dehydrogenase, NADP(+)-dependent, decarboxylating OS=Bacillus subtilis (strain 168) GN=gndA PE=1 SV=4	Cytoplasmic Protein	4	90.2
Bacillus	Firmicutes	Bacillus subtilis	sp|P52209|6PGD_HUMAN 6-phosphogluconate dehydrogenase, decarboxylating OS=Homo sapiens GN=PGD PE=1 SV=3	sp|P12013|6PGDH_BACSU 6-phosphogluconate dehydrogenase, NAD(+)-dependent, decarboxylating OS=Bacillus subtilis (strain 168) GN=gntZ PE=1 SV=1	Cytoplasmic Protein	4	90.2
Bacillus	Firmicutes	Bacillus licheniformis	sp|P52209|6PGD_HUMAN 6-phosphogluconate dehydrogenase, decarboxylating OS=Homo sapiens GN=PGD PE=1 SV=3	sp|P52207|6PGD_BACLI 6-phosphogluconate dehydrogenase, decarboxylating OS=Bacillus licheniformis GN=gntZ PE=3 SV=1	Cytoplasmic Protein	4	90.2
Bacillus	Firmicutes	Bacillus subtilis	sp|Q8WWZ7|ABCA5_HUMAN ATP-binding cassette sub-family A member 5 OS=Homo sapiens GN=ABCA5 PE=2 SV=2	sp|P94440|YFIL_BACSU Uncharacterized ABC transporter ATP-binding protein YfiL OS=Bacillus subtilis (strain 168) GN=yfiL PE=3 SV=2	Cytoplasmic Protein	1	53.1
Bacillus	Firmicutes	Bacillus subtilis	sp|Q8WWZ7|ABCA5_HUMAN ATP-binding cassette sub-family A member 5 OS=Homo sapiens GN=ABCA5 PE=2 SV=2	sp|P94374|YXLF_BACSU Uncharacterized ABC transporter ATP-binding protein YxlF OS=Bacillus subtilis (strain 168) GN=yxlF PE=2 SV=1	Cytoplasmic Protein	4	90.2
Bacillus	Firmicutes	Bacillus cereus	sp|Q8WWZ7|ABCA5_HUMAN ATP-binding cassette sub-family A member 5 OS=Homo sapiens GN=ABCA5 PE=2 SV=2	sp|O31339|CYSA_BACC1 Sulfate/thiosulfate import ATP-binding protein CysA OS=Bacillus cereus (strain ATCC 10987 / NRS 248) GN=cysA PE=3 SV=2	Cytoplasmic Protein	4	90.2
Bacillus	Firmicutes	Bacillus cereus	sp|Q8WWZ7|ABCA5_HUMAN ATP-binding cassette sub-family A member 5 OS=Homo sapiens GN=ABCA5 PE=2 SV=2	sp|Q81GU1|CYSA_BACCR Sulfate/thiosulfate import ATP-binding protein CysA OS=Bacillus cereus (strain ATCC 14579 / DSM 31 / JCM 2152 / NBRC 15305 / NCIMB 9373 / NRRL B-3711) GN=cysA PE=3 SV=1	Cytoplasmic Protein	4	90.2
Bacillus	Firmicutes	Bacillus subtilis	sp|Q8WWZ4|ABCAA_HUMAN ATP-binding cassette sub-family A member 10 OS=Homo sapiens GN=ABCA10 PE=2 SV=3	sp|P70970|ECFA2_BACSU Energy-coupling factor transporter ATP-binding protein EcfA2 OS=Bacillus subtilis (strain 168) GN=ecfAB PE=3 SV=1	Cytoplasmic Protein	1	53.1
Bacillus	Firmicutes	Lactobacillus salivarius	sp|Q8WWZ4|ABCAA_HUMAN ATP-binding cassette sub-family A member 10 OS=Homo sapiens GN=ABCA10 PE=2 SV=3	sp|Q1WSB9|ECFA2_LACS1 Energy-coupling factor transporter ATP-binding protein EcfA2 OS=Lactobacillus salivarius (strain UCC118) GN=ecfA2 PE=3 SV=1	Cytoplasmic Protein	1	53.1
Bacillus	Firmicutes	Lactobacillus sakei	sp|Q8WWZ4|ABCAA_HUMAN ATP-binding cassette sub-family A member 10 OS=Homo sapiens GN=ABCA10 PE=2 SV=3	sp|Q38UU0|ECFA2_LACSS Energy-coupling factor transporter ATP-binding protein EcfA2 OS=Lactobacillus sakei subsp. sakei (strain 23K) GN=ecfA2 PE=3 SV=1	Cytoplasmic Protein	4	90.2
Bacillus	Firmicutes	Bacillus subtilis	sp|Q86UK0|ABCAC_HUMAN ATP-binding cassette sub-family A member 12 OS=Homo sapiens GN=ABCA12 PE=1 SV=3	sp|O07016|YVFR_BACSU Uncharacterized ABC transporter ATP-binding protein YvfR OS=Bacillus subtilis (strain 168) GN=yvfR PE=3 SV=1	Cytoplasmic Protein	1	53.1
Bacillus	Firmicutes	Bacillus subtilis	sp|Q86UK0|ABCAC_HUMAN ATP-binding cassette sub-family A member 12 OS=Homo sapiens GN=ABCA12 PE=1 SV=3	sp|P54592|YHCH_BACSU Uncharacterized ABC transporter ATP-binding protein YhcH OS=Bacillus subtilis (strain 168) GN=yhcH PE=3 SV=1	Inner-membrane Protein	3	71.1
Bacillus	Firmicutes	Bacillus licheniformis	sp|Q86UK0|ABCAC_HUMAN ATP-binding cassette sub-family A member 12 OS=Homo sapiens GN=ABCA12 PE=1 SV=3	sp|P42332|BCRA_BACLI Bacitracin transport ATP-binding protein BcrA OS=Bacillus licheniformis GN=bcrA PE=3 SV=1	Cytoplasmic Protein	4	90.2
Bacillus	Firmicutes	Bacillus subtilis	sp|Q86UK0|ABCAC_HUMAN ATP-binding cassette sub-family A member 12 OS=Homo sapiens GN=ABCA12 PE=1 SV=3	sp|P42246|YCBN_BACSU Uncharacterized ABC transporter ATP-binding protein YcbN OS=Bacillus subtilis (strain 168) GN=ycbN PE=3 SV=4	Cytoplasmic Protein	4	90.2
Bacillus	Firmicutes	Bacillus subtilis	sp|Q86UK0|ABCAC_HUMAN ATP-binding cassette sub-family A member 12 OS=Homo sapiens GN=ABCA12 PE=1 SV=3	sp|O31427|SKFE_BACSU SkfA peptide export ATP-binding protein SkfE OS=Bacillus subtilis (strain 168) GN=skfE PE=2 SV=1	Cytoplasmic Protein	4	90.2
Bacillus	Firmicutes	Bacillus halodurans	sp|O00763|ACACB_HUMAN Acetyl-CoA carboxylase 2 OS=Homo sapiens GN=ACACB PE=1 SV=3	sp|Q9KDS9|ACCC_BACHD Biotin carboxylase OS=Bacillus halodurans (strain ATCC BAA-125 / DSM 18197 / FERM 7344 / JCM 9153 / C-125) GN=accC PE=3 SV=1	Cytoplasmic Protein	1	53.1
Bacillus	Firmicutes	Bacillus subtilis	sp|Q9NUT2|ABCB8_HUMAN ATP-binding cassette sub-family B member 8, mitochondrial OS=Homo sapiens GN=ABCB8 PE=1 SV=3	sp|P71082|YGAD_BACSU Putative multidrug export ATP-binding/permease protein YgaD OS=Bacillus subtilis (strain 168) GN=ygaD PE=3 SV=2	Cytoplasmic Protein	4	90.2
Bacillus	Firmicutes	Bacillus subtilis	sp|Q9NUT2|ABCB8_HUMAN ATP-binding cassette sub-family B member 8, mitochondrial OS=Homo sapiens GN=ABCB8 PE=1 SV=3	sp|O31708|YKNV_BACSU Uncharacterized ABC transporter ATP-binding protein YknV OS=Bacillus subtilis (strain 168) GN=yknV PE=3 SV=1	Cytoplasmic Protein	4	90.2
Bacillus	Firmicutes	Bacillus subtilis	sp|Q9NUT2|ABCB8_HUMAN ATP-binding cassette sub-family B member 8, mitochondrial OS=Homo sapiens GN=ABCB8 PE=1 SV=3	sp|P45861|YWJA_BACSU Uncharacterized ABC transporter ATP-binding protein YwjA OS=Bacillus subtilis (strain 168) GN=ywjA PE=3 SV=1	Cytoplasmic Protein	4	90.2
Bacillus	Firmicutes	Bacillus subtilis	sp|Q9NUT2|ABCB8_HUMAN ATP-binding cassette sub-family B member 8, mitochondrial OS=Homo sapiens GN=ABCB8 PE=1 SV=3	sp|O06967|BMRA_BACSU Multidrug resistance ABC transporter ATP-binding/permease protein BmrA OS=Bacillus subtilis (strain 168) GN=bmrA PE=1 SV=1	Cytoplasmic Protein	4	90.2
Bacillus	Firmicutes	Bacillus subtilis	sp|Q9NRK6|ABCBA_HUMAN ATP-binding cassette sub-family B member 10, mitochondrial OS=Homo sapiens GN=ABCB10 PE=1 SV=2	sp|O31707|YKNU_BACSU Uncharacterized ABC transporter ATP-binding protein YknU OS=Bacillus subtilis (strain 168) GN=yknU PE=3 SV=3	Cytoplasmic Protein	4	90.2
Bacillus	Firmicutes	Bacillus subtilis	sp|Q9NRK6|ABCBA_HUMAN ATP-binding cassette sub-family B member 10, mitochondrial OS=Homo sapiens GN=ABCB10 PE=1 SV=2	sp|O07549|YHEH_BACSU Probable multidrug resistance ABC transporter ATP-binding/permease protein YheH OS=Bacillus subtilis (strain 168) GN=yheH PE=1 SV=1	Cytoplasmic Protein	4	90.2
Bacillus	Firmicutes	Bacillus subtilis	sp|Q9NRK6|ABCBA_HUMAN ATP-binding cassette sub-family B member 10, mitochondrial OS=Homo sapiens GN=ABCB10 PE=1 SV=2	sp|O07550|YHEI_BACSU Probable multidrug resistance ABC transporter ATP-binding/permease protein YheI OS=Bacillus subtilis (strain 168) GN=yheI PE=1 SV=1	Cytoplasmic Protein	4	90.2
Bacillus	Firmicutes	Bacillus subtilis	sp|Q9NRK6|ABCBA_HUMAN ATP-binding cassette sub-family B member 10, mitochondrial OS=Homo sapiens GN=ABCB10 PE=1 SV=2	sp|P54718|YFIB_BACSU Uncharacterized ABC transporter ATP-binding protein YfiB OS=Bacillus subtilis (strain 168) GN=yfiB PE=3 SV=1	Cytoplasmic Protein	4	90.2
Bacillus	Firmicutes	Bacillus subtilis	sp|Q9NRK6|ABCBA_HUMAN ATP-binding cassette sub-family B member 10, mitochondrial OS=Homo sapiens GN=ABCB10 PE=1 SV=2	sp|P54537|ARTM_BACSU Arginine transport ATP-binding protein ArtM OS=Bacillus subtilis (strain 168) GN=artM PE=1 SV=1	Cytoplasmic Protein	4	90.2
Bacillus	Firmicutes	Bacillus subtilis	sp|Q9UG63|ABCF2_HUMAN ATP-binding cassette sub-family F member 2 OS=Homo sapiens GN=ABCF2 PE=1 SV=2	sp|O05519|YDIF_BACSU Uncharacterized ABC transporter ATP-binding protein YdiF OS=Bacillus subtilis (strain 168) GN=ydiF PE=3 SV=2	Cytoplasmic Protein	4	90.2
Bacillus	Firmicutes	Bacillus subtilis	sp|Q9UG63|ABCF2_HUMAN ATP-binding cassette sub-family F member 2 OS=Homo sapiens GN=ABCF2 PE=1 SV=2	sp|O31716|YKPA_BACSU Uncharacterized ABC transporter ATP-binding protein YkpA OS=Bacillus subtilis (strain 168) GN=ykpA PE=3 SV=1	Cytoplasmic Protein	4	90.2
Bacillus	Firmicutes	Bacillus subtilis	sp|Q9UG63|ABCF2_HUMAN ATP-binding cassette sub-family F member 2 OS=Homo sapiens GN=ABCF2 PE=1 SV=2	sp|O34512|YFMM_BACSU Uncharacterized ABC transporter ATP-binding protein YfmM OS=Bacillus subtilis (strain 168) GN=yfmM PE=3 SV=2	Cytoplasmic Protein	1	53.1
Bacillus	Firmicutes	Bacillus subtilis	sp|Q9UG63|ABCF2_HUMAN ATP-binding cassette sub-family F member 2 OS=Homo sapiens GN=ABCF2 PE=1 SV=2	sp|O06476|YFMR_BACSU Uncharacterized ABC transporter ATP-binding protein YfmR OS=Bacillus subtilis (strain 168) GN=yfmR PE=3 SV=1	Cytoplasmic Protein	4	90.2
Bacillus	Firmicutes	Bacillus subtilis	sp|Q9UG63|ABCF2_HUMAN ATP-binding cassette sub-family F member 2 OS=Homo sapiens GN=ABCF2 PE=1 SV=2	sp|P39115|EXPZ_BACSU Nucleotide-binding protein ExpZ OS=Bacillus subtilis (strain 168) GN=expZ PE=3 SV=2	Cytoplasmic Protein	1	53.1
Bacillus	Firmicutes	Bacillus subtilis	sp|Q13085|ACACA_HUMAN Acetyl-CoA carboxylase 1 OS=Homo sapiens GN=ACACA PE=1 SV=2	sp|O34544|ACCC2_BACSU Biotin carboxylase 2 OS=Bacillus subtilis (strain 168) GN=accC2 PE=3 SV=1	Cytoplasmic Protein	4	90.2
Bacillus	Firmicutes	Bacillus subtilis	sp|Q13085|ACACA_HUMAN Acetyl-CoA carboxylase 1 OS=Homo sapiens GN=ACACA PE=1 SV=2	sp|Q9KWU4|PYC_BACSU Pyruvate carboxylase OS=Bacillus subtilis (strain 168) GN=pyc PE=3 SV=1	Cytoplasmic Protein	1	53.1
Bacillus	Firmicutes	Bacillus subtilis	sp|P16219|ACADS_HUMAN Short-chain specific acyl-CoA dehydrogenase, mitochondrial OS=Homo sapiens GN=ACADS PE=1 SV=1	sp|O34421|ACDC_BACSU Probable acyl-CoA dehydrogenase YngJ OS=Bacillus subtilis (strain 168) GN=yngJ PE=3 SV=1	Cytoplasmic Protein	1	53.1
Bacillus	Firmicutes	Bacillus subtilis	sp|Q5FVE4|ACBG2_HUMAN Long-chain-fatty-acid--CoA ligase ACSBG2 OS=Homo sapiens GN=ACSBG2 PE=1 SV=2	sp|P39846|PPSB_BACSU Plipastatin synthase subunit B OS=Bacillus subtilis (strain 168) GN=ppsB PE=1 SV=1	Cytoplasmic Protein	4	90.2
Bacillus	Firmicutes	Bacillus subtilis	sp|Q8IUA7|ABCA9_HUMAN ATP-binding cassette sub-family A member 9 OS=Homo sapiens GN=ABCA9 PE=1 SV=1	sp|P55339|ECSA_BACSU ABC-type transporter ATP-binding protein EcsA OS=Bacillus subtilis (strain 168) GN=ecsA PE=1 SV=1	Cytoplasmic Protein	4	90.2
Bacillus	Firmicutes	Bacillus subtilis	sp|Q9H172|ABCG4_HUMAN ATP-binding cassette sub-family G member 4 OS=Homo sapiens GN=ABCG4 PE=1 SV=2	sp|O34814|FTSE_BACSU Cell division ATP-binding protein FtsE OS=Bacillus subtilis (strain 168) GN=ftsE PE=1 SV=1	Cytoplasmic Protein	4	90.2
Bacillus	Firmicutes	Bacillus halodurans	sp|Q9H172|ABCG4_HUMAN ATP-binding cassette sub-family G member 4 OS=Homo sapiens GN=ABCG4 PE=1 SV=2	sp|Q9KFL0|PHNC2_BACHD Phosphonates import ATP-binding protein PhnC 2 OS=Bacillus halodurans (strain ATCC BAA-125 / DSM 18197 / FERM 7344 / JCM 9153 / C-125) GN=phnC2 PE=3 SV=2	Cytoplasmic Protein	4	90.2
Bacillus	Firmicutes	Bacillus subtilis	sp|Q9H222|ABCG5_HUMAN ATP-binding cassette sub-family G member 5 OS=Homo sapiens GN=ABCG5 PE=1 SV=1	sp|O34697|BCEA_BACSU Bacitracin export ATP-binding protein BceA OS=Bacillus subtilis (strain 168) GN=bceA PE=2 SV=1	Cytoplasmic Protein	4	90.2
Bacillus	Firmicutes	Bacillus subtilis	sp|Q9H222|ABCG5_HUMAN ATP-binding cassette sub-family G member 5 OS=Homo sapiens GN=ABCG5 PE=1 SV=1	sp|P46903|NATA_BACSU ABC transporter ATP-binding protein NatA OS=Bacillus subtilis (strain 168) GN=natA PE=1 SV=1	Cytoplasmic Protein	4	90.2
Bacillus	Firmicutes	Bacillus subtilis	sp|Q9H222|ABCG5_HUMAN ATP-binding cassette sub-family G member 5 OS=Homo sapiens GN=ABCG5 PE=1 SV=1	sp|P42423|YXDL_BACSU ABC transporter ATP-binding protein YxdL OS=Bacillus subtilis (strain 168) GN=yxdL PE=2 SV=2	Inner-membrane Protein	3	71.1
Bacillus	Firmicutes	Bacillus halodurans	sp|Q9H222|ABCG5_HUMAN ATP-binding cassette sub-family G member 5 OS=Homo sapiens GN=ABCG5 PE=1 SV=1	sp|Q9K619|BCEA_BACHD Bacitracin export ATP-binding protein BceA OS=Bacillus halodurans (strain ATCC BAA-125 / DSM 18197 / FERM 7344 / JCM 9153 / C-125) GN=bceA PE=3 SV=1	Inner-membrane Protein	2	68.1
Bacillus	Firmicutes	Bacillus subtilis	sp|Q9H845|ACAD9_HUMAN Acyl-CoA dehydrogenase family member 9, mitochondrial OS=Homo sapiens GN=ACAD9 PE=1 SV=1	sp|O32176|FADE_BACSU Probable acyl-CoA dehydrogenase OS=Bacillus subtilis (strain 168) GN=fadE PE=2 SV=1	Cytoplasmic Protein	4	90.2
Bacillus	Firmicutes	Bacillus subtilis	sp|Q96GR2|ACBG1_HUMAN Long-chain-fatty-acid--CoA ligase ACSBG1 OS=Homo sapiens GN=ACSBG1 PE=2 SV=2	sp|P96575|YDAB_BACSU Putative acyl--CoA ligase YdaB OS=Bacillus subtilis (strain 168) GN=ydaB PE=3 SV=2	Cytoplasmic Protein	4	90.2
Bacillus	Firmicutes	Bacillus licheniformis	sp|Q96GR2|ACBG1_HUMAN Long-chain-fatty-acid--CoA ligase ACSBG1 OS=Homo sapiens GN=ACSBG1 PE=2 SV=2	sp|O68007|BACB_BACLI Bacitracin synthase 2 OS=Bacillus licheniformis GN=bacB PE=3 SV=1	Cytoplasmic Protein	1	53.1
Bacillus	Firmicutes	Bacillus subtilis	sp|O60488|ACSL4_HUMAN Long-chain-fatty-acid--CoA ligase 4 OS=Homo sapiens GN=ACSL4 PE=1 SV=2	sp|P45745|DHBF_BACSU Dimodular nonribosomal peptide synthase OS=Bacillus subtilis (strain 168) GN=dhbF PE=1 SV=4	Cytoplasmic Protein	4	90.2
Bacillus	Firmicutes	Bacillus subtilis	sp|O60488|ACSL4_HUMAN Long-chain-fatty-acid--CoA ligase 4 OS=Homo sapiens GN=ACSL4 PE=1 SV=2	sp|O31827|PPSE_BACSU Plipastatin synthase subunit E OS=Bacillus subtilis (strain 168) GN=ppsE PE=1 SV=1	Cytoplasmic Protein	4	90.2
Bacillus	Firmicutes	Bacillus subtilis	sp|Q53FZ2|ACSM3_HUMAN Acyl-coenzyme A synthetase ACSM3, mitochondrial OS=Homo sapiens GN=ACSM3 PE=1 SV=2	sp|C0SPB0|YTCI_BACSU Uncharacterized acyl--CoA ligase YtcI OS=Bacillus subtilis (strain 168) GN=ytcI PE=3 SV=1	Cytoplasmic Protein	1	53.1
Bacillus	Firmicutes	Bacillus subtilis	sp|Q53FZ2|ACSM3_HUMAN Acyl-coenzyme A synthetase ACSM3, mitochondrial OS=Homo sapiens GN=ACSM3 PE=1 SV=2	sp|P39062|ACSA_BACSU Acetyl-coenzyme A synthetase OS=Bacillus subtilis (strain 168) GN=acsA PE=1 SV=1	Cytoplasmic Protein	4	90.2
Bacillus	Firmicutes	Bacillus subtilis	sp|P0C7M7|ACSM4_HUMAN Acyl-coenzyme A synthetase ACSM4, mitochondrial OS=Homo sapiens GN=ACSM4 PE=2 SV=1	sp|O31826|YNGI_BACSU Putative acyl-CoA synthetase YngI OS=Bacillus subtilis (strain 168) GN=yngI PE=3 SV=1	Cytoplasmic Protein	4	90.2
Bacillus	Firmicutes	Bacillus cereus	sp|Q9BZC7|ABCA2_HUMAN ATP-binding cassette sub-family A member 2 OS=Homo sapiens GN=ABCA2 PE=1 SV=3	sp|Q81CT8|Y2655_BACCR Putative ABC transporter ATP-binding protein BC_2655 OS=Bacillus cereus (strain ATCC 14579 / DSM 31 / JCM 2152 / NBRC 15305 / NCIMB 9373 / NRRL B-3711) GN=BC_2655 PE=3 SV=2	Cytoplasmic Protein	4	90.2
Bacillus	Firmicutes	Bacillus anthracis	sp|Q9BZC7|ABCA2_HUMAN ATP-binding cassette sub-family A member 2 OS=Homo sapiens GN=ABCA2 PE=1 SV=3	sp|Q81PZ8|Y2641_BACAN Putative ABC transporter ATP-binding protein BA_2641/GBAA_2641/BAS2461 OS=Bacillus anthracis GN=BA_2641 PE=3 SV=1	Cytoplasmic Protein	4	90.2
Bacillus	Firmicutes	Lactobacillus gasseri	sp|O75027|ABCB7_HUMAN ATP-binding cassette sub-family B member 7, mitochondrial OS=Homo sapiens GN=ABCB7 PE=1 SV=2	sp|Q042G7|POTA_LACGA Spermidine/putrescine import ATP-binding protein PotA OS=Lactobacillus gasseri (strain ATCC 33323 / DSM 20243 / JCM 1131 / NCIMB 11718 / AM63) GN=potA PE=3 SV=2	Cytoplasmic Protein	1	53.1
Bacillus	Firmicutes	Lactobacillus johnsonii	sp|O75027|ABCB7_HUMAN ATP-binding cassette sub-family B member 7, mitochondrial OS=Homo sapiens GN=ABCB7 PE=1 SV=2	sp|Q74K65|POTA_LACJO Spermidine/putrescine import ATP-binding protein PotA OS=Lactobacillus johnsonii (strain CNCM I-12250 / La1 / NCC 533) GN=potA PE=3 SV=1	Cytoplasmic Protein	1	53.1
Bacillus	Firmicutes	Lactobacillus delbrueckii	sp|O75027|ABCB7_HUMAN ATP-binding cassette sub-family B member 7, mitochondrial OS=Homo sapiens GN=ABCB7 PE=1 SV=2	sp|Q1GB17|POTA_LACDA Spermidine/putrescine import ATP-binding protein PotA OS=Lactobacillus delbrueckii subsp. bulgaricus (strain ATCC 11842 / DSM 20081 / JCM 1002 / NBRC 13953 / NCIMB 11778) GN=potA PE=3 SV=2	Cytoplasmic Protein	1	53.1
Bacillus	Firmicutes	Lactobacillus acidophilus	sp|O75027|ABCB7_HUMAN ATP-binding cassette sub-family B member 7, mitochondrial OS=Homo sapiens GN=ABCB7 PE=1 SV=2	sp|Q5FL41|POTA_LACAC Spermidine/putrescine import ATP-binding protein PotA OS=Lactobacillus acidophilus (strain ATCC 700396 / NCK56 / N2 / NCFM) GN=potA PE=3 SV=1	Cytoplasmic Protein	4	90.2
Bacillus	Firmicutes	Lactobacillus delbrueckii	sp|O75027|ABCB7_HUMAN ATP-binding cassette sub-family B member 7, mitochondrial OS=Homo sapiens GN=ABCB7 PE=1 SV=2	sp|Q04BG2|POTA_LACDB Spermidine/putrescine import ATP-binding protein PotA OS=Lactobacillus delbrueckii subsp. bulgaricus (strain ATCC BAA-365) GN=potA PE=3 SV=1	Cytoplasmic Protein	4	90.2
Bacillus	Firmicutes	Lactobacillus salivarius	sp|O75027|ABCB7_HUMAN ATP-binding cassette sub-family B member 7, mitochondrial OS=Homo sapiens GN=ABCB7 PE=1 SV=2	sp|Q1WVI7|POTA_LACS1 Spermidine/putrescine import ATP-binding protein PotA OS=Lactobacillus salivarius (strain UCC118) GN=potA PE=3 SV=1	Cytoplasmic Protein	4	90.2
Bacillus	Firmicutes	Lactobacillus sakei	sp|O75027|ABCB7_HUMAN ATP-binding cassette sub-family B member 7, mitochondrial OS=Homo sapiens GN=ABCB7 PE=1 SV=2	sp|Q38WL5|METN_LACSS Methionine import ATP-binding protein MetN OS=Lactobacillus sakei subsp. sakei (strain 23K) GN=metN PE=3 SV=1	Cytoplasmic Protein	1	53.1
Bacillus	Firmicutes	Lactobacillus brevis	sp|O75027|ABCB7_HUMAN ATP-binding cassette sub-family B member 7, mitochondrial OS=Homo sapiens GN=ABCB7 PE=1 SV=2	sp|Q03P57|METN_LACBA Methionine import ATP-binding protein MetN OS=Lactobacillus brevis (strain ATCC 367 / JCM 1170) GN=metN PE=3 SV=1	Cytoplasmic Protein	4	90.2
Bacillus	Firmicutes	Bacillus subtilis	sp|P21399|ACOC_HUMAN Cytoplasmic aconitate hydratase OS=Homo sapiens GN=ACO1 PE=1 SV=3	sp|P09339|ACNA_BACSU Aconitate hydratase A OS=Bacillus subtilis (strain 168) GN=citB PE=1 SV=4	Cytoplasmic Protein	4	90.2
Bacillus	Firmicutes	Bacillus licheniformis	sp|Q9NUB1|ACS2L_HUMAN Acetyl-coenzyme A synthetase 2-like, mitochondrial OS=Homo sapiens GN=ACSS1 PE=1 SV=2	sp|O68008|BACC_BACLI Bacitracin synthase 3 OS=Bacillus licheniformis GN=bacC PE=3 SV=1	Cytoplasmic Protein	1	53.1
Bacillus	Firmicutes	Bacillus subtilis	sp|Q9NUB1|ACS2L_HUMAN Acetyl-coenzyme A synthetase 2-like, mitochondrial OS=Homo sapiens GN=ACSS1 PE=1 SV=2	sp|P94459|PPSD_BACSU Plipastatin synthase subunit D OS=Bacillus subtilis (strain 168) GN=ppsD PE=1 SV=2	Cytoplasmic Protein	4	90.2
Bacillus	Firmicutes	Bacillus subtilis	sp|Q9NR19|ACSA_HUMAN Acetyl-coenzyme A synthetase, cytoplasmic OS=Homo sapiens GN=ACSS2 PE=1 SV=1	sp|P39847|PPSC_BACSU Plipastatin synthase subunit C OS=Bacillus subtilis (strain 168) GN=ppsC PE=1 SV=2	Cytoplasmic Protein	4	90.2
Bacillus	Firmicutes	Bacillus licheniformis	sp|Q9NR19|ACSA_HUMAN Acetyl-coenzyme A synthetase, cytoplasmic OS=Homo sapiens GN=ACSS2 PE=1 SV=1	sp|O68006|BACA_BACLI Bacitracin synthase 1 OS=Bacillus licheniformis GN=bacA PE=3 SV=1	Cytoplasmic Protein	4	90.2
Bacillus	Firmicutes	Bacillus subtilis	sp|Q9NR19|ACSA_HUMAN Acetyl-coenzyme A synthetase, cytoplasmic OS=Homo sapiens GN=ACSS2 PE=1 SV=1	sp|O07619|YHFT_BACSU Uncharacterized acyl--CoA ligase YhfT OS=Bacillus subtilis (strain 168) GN=yhfT PE=2 SV=1	Cytoplasmic Protein	4	90.2
Bacillus	Firmicutes	Bacillus subtilis	sp|Q9NR19|ACSA_HUMAN Acetyl-coenzyme A synthetase, cytoplasmic OS=Homo sapiens GN=ACSS2 PE=1 SV=1	sp|Q9R9I9|MYCC_BACIU Mycosubtilin synthase subunit C OS=Bacillus subtilis GN=mycC PE=3 SV=1	Cytoplasmic Protein	4	90.2
Bacillus	Firmicutes	Bacillus subtilis	sp|Q9NR19|ACSA_HUMAN Acetyl-coenzyme A synthetase, cytoplasmic OS=Homo sapiens GN=ACSS2 PE=1 SV=1	sp|Q04747|SRFAB_BACSU Surfactin synthase subunit 2 OS=Bacillus subtilis (strain 168) GN=srfAB PE=1 SV=3	Cytoplasmic Protein	4	90.2
Bacillus	Firmicutes	Bacillus subtilis	sp|Q9NR19|ACSA_HUMAN Acetyl-coenzyme A synthetase, cytoplasmic OS=Homo sapiens GN=ACSS2 PE=1 SV=1	sp|Q9R9J0|MYCB_BACIU Mycosubtilin synthase subunit B OS=Bacillus subtilis GN=mycB PE=3 SV=1	Cytoplasmic Protein	1	53.1
Bacillus	Firmicutes	Bacillus subtilis	sp|Q9NR19|ACSA_HUMAN Acetyl-coenzyme A synthetase, cytoplasmic OS=Homo sapiens GN=ACSS2 PE=1 SV=1	sp|P40806|PKSJ_BACSU Polyketide synthase PksJ OS=Bacillus subtilis (strain 168) GN=pksJ PE=1 SV=3	Cytoplasmic Protein	1	53.1
Bacillus	Firmicutes	Bacillus cereus	sp|Q9ULC5|ACSL5_HUMAN Long-chain-fatty-acid--CoA ligase 5 OS=Homo sapiens GN=ACSL5 PE=1 SV=1	sp|Q72YK9|MENE_BACC1 2-succinylbenzoate--CoA ligase OS=Bacillus cereus (strain ATCC 10987 / NRS 248) GN=menE PE=3 SV=1	Cytoplasmic Protein	4	90.2
Bacillus	Firmicutes	Bacillus subtilis	sp|P45954|ACDSB_HUMAN Short/branched chain specific acyl-CoA dehydrogenase, mitochondrial OS=Homo sapiens GN=ACADSB PE=1 SV=1	sp|P45867|ACDA_BACSU Acyl-CoA dehydrogenase OS=Bacillus subtilis (strain 168) GN=acdA PE=2 SV=1	Cytoplasmic Protein	4	90.2
Bacillus	Firmicutes	Bacillus subtilis	sp|Q68CK6|ACS2B_HUMAN Acyl-coenzyme A synthetase ACSM2B, mitochondrial OS=Homo sapiens GN=ACSM2B PE=1 SV=2	sp|P94547|LCFA_BACSU Long-chain-fatty-acid--CoA ligase OS=Bacillus subtilis (strain 168) GN=lcfA PE=3 SV=1	Cytoplasmic Protein	4	90.2
Bacillus	Firmicutes	Bacillus licheniformis	sp|Q96CM8|ACSF2_HUMAN Acyl-CoA synthetase family member 2, mitochondrial OS=Homo sapiens GN=ACSF2 PE=1 SV=2	sp|Q65FT5|MENE_BACLD 2-succinylbenzoate--CoA ligase OS=Bacillus licheniformis (strain ATCC 14580 / DSM 13 / JCM 2505 / NBRC 12200 / NCIMB 9375 / NRRL NRS-1264 / Gibson 46) GN=menE PE=3 SV=1	Cytoplasmic Protein	4	90.2
Bacillus	Firmicutes	Bacillus pumilus	sp|Q96CM8|ACSF2_HUMAN Acyl-CoA synthetase family member 2, mitochondrial OS=Homo sapiens GN=ACSF2 PE=1 SV=2	sp|A8FGK6|MENE_BACP2 2-succinylbenzoate--CoA ligase OS=Bacillus pumilus (strain SAFR-032) GN=menE PE=3 SV=1	Cytoplasmic Protein	4	90.2
Bacillus	Firmicutes	Bacillus subtilis	sp|Q96CM8|ACSF2_HUMAN Acyl-CoA synthetase family member 2, mitochondrial OS=Homo sapiens GN=ACSF2 PE=1 SV=2	sp|P23971|MENE_BACSU 2-succinylbenzoate--CoA ligase OS=Bacillus subtilis (strain 168) GN=menE PE=1 SV=2	Cytoplasmic Protein	4	90.2
Bacillus	Firmicutes	Bacillus methylotrophicus	sp|Q96CM8|ACSF2_HUMAN Acyl-CoA synthetase family member 2, mitochondrial OS=Homo sapiens GN=ACSF2 PE=1 SV=2	sp|A7Z809|MENE_BACMF 2-succinylbenzoate--CoA ligase OS=Bacillus methylotrophicus (strain DSM 23117 / BGSC 10A6 / FZB42) GN=menE PE=3 SV=1	Cytoplasmic Protein	4	90.2
Bacillus	Firmicutes	Bacillus subtilis	sp|Q99758|ABCA3_HUMAN ATP-binding cassette sub-family A member 3 OS=Homo sapiens GN=ABCA3 PE=1 SV=2	sp|C0SPB4|YHAQ_BACSU Uncharacterized ABC transporter ATP-binding protein YhaQ OS=Bacillus subtilis (strain 168) GN=yhaQ PE=3 SV=1	Cytoplasmic Protein	4	90.2
Bacillus	Firmicutes	Bacillus pseudofirmus	sp|Q99758|ABCA3_HUMAN ATP-binding cassette sub-family A member 3 OS=Homo sapiens GN=ABCA3 PE=1 SV=2	sp|P26946|Y2279_BACPE Uncharacterized ABC transporter ATP-binding protein BpOF4_11395 OS=Bacillus pseudofirmus (strain OF4) GN=BpOF4_11395 PE=3 SV=2	Cytoplasmic Protein	4	90.2
Bacillus	Firmicutes	Bacillus cereus	sp|Q4W5N1|ABCAB_HUMAN Putative ATP-binding cassette sub-family A member 11 OS=Homo sapiens GN=ABCA11P PE=2 SV=1	sp|Q737I0|Y2668_BACC1 Putative ABC transporter ATP-binding protein BCE_2668 OS=Bacillus cereus (strain ATCC 10987 / NRS 248) GN=BCE_2668 PE=3 SV=1	Cytoplasmic Protein	1	53.1
Bacillus	Firmicutes	Bacillus subtilis	sp|Q86UQ4|ABCAD_HUMAN ATP-binding cassette sub-family A member 13 OS=Homo sapiens GN=ABCA13 PE=2 SV=3	sp|P37494|YYBJ_BACSU Uncharacterized ABC transporter ATP-binding protein YybJ OS=Bacillus subtilis (strain 168) GN=yybJ PE=3 SV=1	Cytoplasmic Protein	1	53.1
Bacillus	Firmicutes	Lactobacillus plantarum	sp|Q2M3G0|ABCB5_HUMAN ATP-binding cassette sub-family B member 5 OS=Homo sapiens GN=ABCB5 PE=1 SV=4	sp|Q88XV2|ECFA1_LACPL Energy-coupling factor transporter ATP-binding protein EcfA1 OS=Lactobacillus plantarum (strain ATCC BAA-793 / NCIMB 8826 / WCFS1) GN=ecfA1 PE=3 SV=1	Cytoplasmic Protein	4	90.2
Bacillus	Firmicutes	Bacillus cereus	sp|Q2M3G0|ABCB5_HUMAN ATP-binding cassette sub-family B member 5 OS=Homo sapiens GN=ABCB5 PE=1 SV=4	sp|Q81J16|ECFA1_BACCR Energy-coupling factor transporter ATP-binding protein EcfA1 OS=Bacillus cereus (strain ATCC 14579 / DSM 31 / JCM 2152 / NBRC 15305 / NCIMB 9373 / NRRL B-3711) GN=ecfA1 PE=3 SV=1	Cytoplasmic Protein	1	53.1
Bacillus	Firmicutes	Bacillus cereus	sp|Q2M3G0|ABCB5_HUMAN ATP-binding cassette sub-family B member 5 OS=Homo sapiens GN=ABCB5 PE=1 SV=4	sp|Q73F67|ECFA1_BACC1 Energy-coupling factor transporter ATP-binding protein EcfA1 OS=Bacillus cereus (strain ATCC 10987 / NRS 248) GN=ecfA1 PE=3 SV=1	Cytoplasmic Protein	1	53.1
Bacillus	Firmicutes	Bacillus subtilis	sp|Q2M3G0|ABCB5_HUMAN ATP-binding cassette sub-family B member 5 OS=Homo sapiens GN=ABCB5 PE=1 SV=4	sp|O34900|TCYN_BACSU L-cystine import ATP-binding protein TcyN OS=Bacillus subtilis (strain 168) GN=tcyN PE=1 SV=1	Cytoplasmic Protein	1	53.1
Bacillus	Firmicutes	Bacillus anthracis	sp|Q2M3G0|ABCB5_HUMAN ATP-binding cassette sub-family B member 5 OS=Homo sapiens GN=ABCB5 PE=1 SV=4	sp|Q81ZF5|METN2_BACAN Methionine import ATP-binding protein MetN 2 OS=Bacillus anthracis GN=metN2 PE=3 SV=1	Cytoplasmic Protein	4	90.2
Bacillus	Firmicutes	Bacillus cereus	sp|Q2M3G0|ABCB5_HUMAN ATP-binding cassette sub-family B member 5 OS=Homo sapiens GN=ABCB5 PE=1 SV=4	sp|Q81IN8|METN2_BACCR Methionine import ATP-binding protein MetN 2 OS=Bacillus cereus (strain ATCC 14579 / DSM 31 / JCM 2152 / NBRC 15305 / NCIMB 9373 / NRRL B-3711) GN=metN2 PE=3 SV=1	Cytoplasmic Protein	1	53.1
Bacillus	Firmicutes	Bacillus thuringiensis	sp|Q2M3G0|ABCB5_HUMAN ATP-binding cassette sub-family B member 5 OS=Homo sapiens GN=ABCB5 PE=1 SV=4	sp|Q6HPN0|ECFA1_BACHK Energy-coupling factor transporter ATP-binding protein EcfA1 OS=Bacillus thuringiensis subsp. konkukian (strain 97-27) GN=ecfA1 PE=3 SV=2	Cytoplasmic Protein	4	90.2
Bacillus	Firmicutes	Bacillus thuringiensis	sp|Q2M3G0|ABCB5_HUMAN ATP-binding cassette sub-family B member 5 OS=Homo sapiens GN=ABCB5 PE=1 SV=4	sp|A0R8K8|ECFA1_BACAH Energy-coupling factor transporter ATP-binding protein EcfA1 OS=Bacillus thuringiensis (strain Al Hakam) GN=ecfA1 PE=3 SV=2	Inner-membrane Protein	3	71.1
Bacillus	Firmicutes	Bacillus anthracis	sp|Q2M3G0|ABCB5_HUMAN ATP-binding cassette sub-family B member 5 OS=Homo sapiens GN=ABCB5 PE=1 SV=4	sp|Q81VQ2|ECFA1_BACAN Energy-coupling factor transporter ATP-binding protein EcfA1 OS=Bacillus anthracis GN=ecfA1 PE=3 SV=1	Cytoplasmic Protein	4	90.2
Bacillus	Firmicutes	Bacillus cereus	sp|Q2M3G0|ABCB5_HUMAN ATP-binding cassette sub-family B member 5 OS=Homo sapiens GN=ABCB5 PE=1 SV=4	sp|Q63H62|ECFA1_BACCZ Energy-coupling factor transporter ATP-binding protein EcfA1 OS=Bacillus cereus (strain ZK / E33L) GN=ecfA1 PE=3 SV=2	Cytoplasmic Protein	4	90.2
Bacillus	Firmicutes	Bacillus thuringiensis	sp|Q2M3G0|ABCB5_HUMAN ATP-binding cassette sub-family B member 5 OS=Homo sapiens GN=ABCB5 PE=1 SV=4	sp|Q6HP89|METN1_BACHK Methionine import ATP-binding protein MetN 1 OS=Bacillus thuringiensis subsp. konkukian (strain 97-27) GN=metN1 PE=3 SV=1	Cytoplasmic Protein	1	53.1
Bacillus	Firmicutes	Lactobacillus plantarum	sp|Q9NP58|ABCB6_HUMAN ATP-binding cassette sub-family B member 6, mitochondrial OS=Homo sapiens GN=ABCB6 PE=1 SV=1	sp|Q88YK7|PSTB2_LACPL Phosphate import ATP-binding protein PstB 2 OS=Lactobacillus plantarum (strain ATCC BAA-793 / NCIMB 8826 / WCFS1) GN=pstB2 PE=3 SV=1	Cytoplasmic Protein	4	90.2
Bacillus	Firmicutes	Lactobacillus sakei	sp|Q9NP78|ABCB9_HUMAN ATP-binding cassette sub-family B member 9 OS=Homo sapiens GN=ABCB9 PE=1 SV=1	sp|Q38UT9|ECFA1_LACSS Energy-coupling factor transporter ATP-binding protein EcfA1 OS=Lactobacillus sakei subsp. sakei (strain 23K) GN=ecfA1 PE=3 SV=1	Inner-membrane Protein	3	71.1
Bacillus	Firmicutes	Bacillus licheniformis	sp|Q9NP78|ABCB9_HUMAN ATP-binding cassette sub-family B member 9 OS=Homo sapiens GN=ABCB9 PE=1 SV=1	sp|Q65F80|METN2_BACLD Methionine import ATP-binding protein MetN 2 OS=Bacillus licheniformis (strain ATCC 14580 / DSM 13 / JCM 2505 / NBRC 12200 / NCIMB 9375 / NRRL NRS-1264 / Gibson 46) GN=metN2 PE=3 SV=1	Cytoplasmic Protein	1	53.1
Bacillus	Firmicutes	Lactobacillus salivarius	sp|Q9NP78|ABCB9_HUMAN ATP-binding cassette sub-family B member 9 OS=Homo sapiens GN=ABCB9 PE=1 SV=1	sp|Q1WSB8|ECFA1_LACS1 Energy-coupling factor transporter ATP-binding protein EcfA1 OS=Lactobacillus salivarius (strain UCC118) GN=ecfA1 PE=3 SV=1	Cytoplasmic Protein	1	53.1
Bacillus	Firmicutes	Bacillus clausii	sp|Q9NP78|ABCB9_HUMAN ATP-binding cassette sub-family B member 9 OS=Homo sapiens GN=ABCB9 PE=1 SV=1	sp|Q5WDP1|METN3_BACSK Methionine import ATP-binding protein MetN 3 OS=Bacillus clausii (strain KSM-K16) GN=metN3 PE=3 SV=1	Cytoplasmic Protein	4	90.2
Bacillus	Firmicutes	Bacillus cereus	sp|Q9NP78|ABCB9_HUMAN ATP-binding cassette sub-family B member 9 OS=Homo sapiens GN=ABCB9 PE=1 SV=1	sp|Q73EL7|METN2_BACC1 Methionine import ATP-binding protein MetN 2 OS=Bacillus cereus (strain ATCC 10987 / NRS 248) GN=metN2 PE=3 SV=1	Cytoplasmic Protein	4	90.2
Bacillus	Firmicutes	Bacillus subtilis	sp|Q9NP78|ABCB9_HUMAN ATP-binding cassette sub-family B member 9 OS=Homo sapiens GN=ABCB9 PE=1 SV=1	sp|O32169|METN_BACSU Methionine import ATP-binding protein MetN OS=Bacillus subtilis (strain 168) GN=metN PE=1 SV=1	Inner-membrane Protein	3	71.1
Bacillus	Firmicutes	Bacillus cereus	sp|Q9NP78|ABCB9_HUMAN ATP-binding cassette sub-family B member 9 OS=Homo sapiens GN=ABCB9 PE=1 SV=1	sp|Q63GR8|METN2_BACCZ Methionine import ATP-binding protein MetN 2 OS=Bacillus cereus (strain ZK / E33L) GN=metN2 PE=3 SV=1	Cytoplasmic Protein	1	53.1
Bacillus	Firmicutes	Lactobacillus delbrueckii	sp|Q9NP78|ABCB9_HUMAN ATP-binding cassette sub-family B member 9 OS=Homo sapiens GN=ABCB9 PE=1 SV=1	sp|Q1GBJ0|ECFA1_LACDA Energy-coupling factor transporter ATP-binding protein EcfA1 OS=Lactobacillus delbrueckii subsp. bulgaricus (strain ATCC 11842 / DSM 20081 / JCM 1002 / NBRC 13953 / NCIMB 11778) GN=ecfA1 PE=3 SV=1	Cytoplasmic Protein	4	90.2
Bacillus	Firmicutes	Bacillus weihenstephanensis	sp|Q4G176|ACSF3_HUMAN Acyl-CoA synthetase family member 3, mitochondrial OS=Homo sapiens GN=ACSF3 PE=1 SV=3	sp|A9VM74|MENE_BACWK 2-succinylbenzoate--CoA ligase OS=Bacillus weihenstephanensis (strain KBAB4) GN=menE PE=3 SV=1	Cytoplasmic Protein	1	53.1
Bacillus	Firmicutes	Bacillus cereus	sp|Q4G176|ACSF3_HUMAN Acyl-CoA synthetase family member 3, mitochondrial OS=Homo sapiens GN=ACSF3 PE=1 SV=3	sp|B7JDD6|MENE_BACC0 2-succinylbenzoate--CoA ligase OS=Bacillus cereus (strain AH820) GN=menE PE=3 SV=1	Cytoplasmic Protein	1	53.1
Bacillus	Firmicutes	Bacillus cereus	sp|Q4G176|ACSF3_HUMAN Acyl-CoA synthetase family member 3, mitochondrial OS=Homo sapiens GN=ACSF3 PE=1 SV=3	sp|B9J2F2|MENE_BACCQ 2-succinylbenzoate--CoA ligase OS=Bacillus cereus (strain Q1) GN=menE PE=3 SV=1	Cytoplasmic Protein	1	53.1
Bacillus	Firmicutes	Bacillus thuringiensis	sp|Q4G176|ACSF3_HUMAN Acyl-CoA synthetase family member 3, mitochondrial OS=Homo sapiens GN=ACSF3 PE=1 SV=3	sp|Q6HC29|MENE_BACHK 2-succinylbenzoate--CoA ligase OS=Bacillus thuringiensis subsp. konkukian (strain 97-27) GN=menE PE=3 SV=1	Cytoplasmic Protein	4	90.2
Bacillus	Firmicutes	Bacillus cereus	sp|Q4G176|ACSF3_HUMAN Acyl-CoA synthetase family member 3, mitochondrial OS=Homo sapiens GN=ACSF3 PE=1 SV=3	sp|B7HTW3|MENE_BACC7 2-succinylbenzoate--CoA ligase OS=Bacillus cereus (strain AH187) GN=menE PE=3 SV=1	Cytoplasmic Protein	4	90.2
Bacillus	Firmicutes	Bacillus cereus	sp|Q4G176|ACSF3_HUMAN Acyl-CoA synthetase family member 3, mitochondrial OS=Homo sapiens GN=ACSF3 PE=1 SV=3	sp|Q816I1|MENE_BACCR 2-succinylbenzoate--CoA ligase OS=Bacillus cereus (strain ATCC 14579 / DSM 31 / JCM 2152 / NBRC 15305 / NCIMB 9373 / NRRL B-3711) GN=menE PE=3 SV=1	Cytoplasmic Protein	4	90.2
Bacillus	Firmicutes	Bacillus anthracis	sp|Q4G176|ACSF3_HUMAN Acyl-CoA synthetase family member 3, mitochondrial OS=Homo sapiens GN=ACSF3 PE=1 SV=3	sp|C3LB87|MENE_BACAC 2-succinylbenzoate--CoA ligase OS=Bacillus anthracis (strain CDC 684 / NRRL 3495) GN=menE PE=3 SV=1	Cytoplasmic Protein	4	90.2
Bacillus	Firmicutes	Bacillus anthracis	sp|Q4G176|ACSF3_HUMAN Acyl-CoA synthetase family member 3, mitochondrial OS=Homo sapiens GN=ACSF3 PE=1 SV=3	sp|C3PCK3|MENE_BACAA 2-succinylbenzoate--CoA ligase OS=Bacillus anthracis (strain A0248) GN=menE PE=3 SV=1	Cytoplasmic Protein	4	90.2
Bacillus	Firmicutes	Bacillus anthracis	sp|Q4G176|ACSF3_HUMAN Acyl-CoA synthetase family member 3, mitochondrial OS=Homo sapiens GN=ACSF3 PE=1 SV=3	sp|Q81K97|MENE_BACAN 2-succinylbenzoate--CoA ligase OS=Bacillus anthracis GN=menE PE=3 SV=1	Cytoplasmic Protein	1	53.1
Bacillus	Firmicutes	Bacillus thuringiensis	sp|Q4G176|ACSF3_HUMAN Acyl-CoA synthetase family member 3, mitochondrial OS=Homo sapiens GN=ACSF3 PE=1 SV=3	sp|A0RK73|MENE_BACAH 2-succinylbenzoate--CoA ligase OS=Bacillus thuringiensis (strain Al Hakam) GN=menE PE=3 SV=1	Cytoplasmic Protein	3	71.1
Bacillus	Firmicutes	Bacillus cereus	sp|Q4G176|ACSF3_HUMAN Acyl-CoA synthetase family member 3, mitochondrial OS=Homo sapiens GN=ACSF3 PE=1 SV=3	sp|Q632I5|MENE_BACCZ 2-succinylbenzoate--CoA ligase OS=Bacillus cereus (strain ZK / E33L) GN=menE PE=3 SV=1	Cytoplasmic Protein	4	90.2
Bacillus	Firmicutes	Bacillus cytotoxicus	sp|Q4G176|ACSF3_HUMAN Acyl-CoA synthetase family member 3, mitochondrial OS=Homo sapiens GN=ACSF3 PE=1 SV=3	sp|A7GU88|MENE_BACCN 2-succinylbenzoate--CoA ligase OS=Bacillus cytotoxicus (strain DSM 22905 / CIP 110041 / 391-98 / NVH 391-98) GN=menE PE=3 SV=1	Cytoplasmic Protein	1	53.1
Bacillus	Firmicutes	Bacillus subtilis	sp|Q4G176|ACSF3_HUMAN Acyl-CoA synthetase family member 3, mitochondrial OS=Homo sapiens GN=ACSF3 PE=1 SV=3	sp|P27206|SRFAA_BACSU Surfactin synthase subunit 1 OS=Bacillus subtilis (strain 168) GN=srfAA PE=1 SV=4	Cytoplasmic Protein	4	90.2
Bacillus	Firmicutes	Bacillus subtilis	sp|Q4G176|ACSF3_HUMAN Acyl-CoA synthetase family member 3, mitochondrial OS=Homo sapiens GN=ACSF3 PE=1 SV=3	sp|P39845|PPSA_BACSU Plipastatin synthase subunit A OS=Bacillus subtilis (strain 168) GN=ppsA PE=1 SV=2	Cytoplasmic Protein	4	90.2
Bacillus	Firmicutes	Bacillus sp.	sp|Q96NN9|AIFM3_HUMAN Apoptosis-inducing factor 3 OS=Homo sapiens GN=AIFM3 PE=1 SV=1	sp|P26829|DHNA_BACYN NADH dehydrogenase OS=Bacillus sp. (strain YN-1) GN=ahpF PE=1 SV=1	Cytoplasmic Protein	1	53.1
Bacillus	Firmicutes	Bacillus subtilis	sp|P51648|AL3A2_HUMAN Fatty aldehyde dehydrogenase OS=Homo sapiens GN=ALDH3A2 PE=1 SV=1	sp|P39616|ALDH2_BACSU Probable aldehyde dehydrogenase YwdH OS=Bacillus subtilis (strain 168) GN=ywdH PE=3 SV=2	Cytoplasmic Protein	4	90.2
Bacillus	Firmicutes	Bacillus subtilis	sp|P51648|AL3A2_HUMAN Fatty aldehyde dehydrogenase OS=Homo sapiens GN=ALDH3A2 PE=1 SV=1	sp|P46329|ALDH3_BACSU Probable aldehyde dehydrogenase AldX OS=Bacillus subtilis (strain 168) GN=aldX PE=3 SV=2	Cytoplasmic Protein	1	53.1
Bacillus	Firmicutes	Bacillus subtilis	sp|P51648|AL3A2_HUMAN Fatty aldehyde dehydrogenase OS=Homo sapiens GN=ALDH3A2 PE=1 SV=1	sp|O34660|ALDH4_BACSU Putative aldehyde dehydrogenase DhaS OS=Bacillus subtilis (strain 168) GN=dhaS PE=3 SV=1	Cytoplasmic Protein	3	71.1
Bacillus	Firmicutes	Bacillus subtilis	sp|Q96JD6|AKCL2_HUMAN 1,5-anhydro-D-fructose reductase OS=Homo sapiens GN=AKR1E2 PE=1 SV=2	sp|O34678|YTBE_BACSU Uncharacterized oxidoreductase YtbE OS=Bacillus subtilis (strain 168) GN=ytbE PE=1 SV=1	Cytoplasmic Protein	4	90.2
Bacillus	Firmicutes	Bacillus subtilis	sp|Q96JD6|AKCL2_HUMAN 1,5-anhydro-D-fructose reductase OS=Homo sapiens GN=AKR1E2 PE=1 SV=2	sp|O32210|GR_BACSU Glyoxal reductase OS=Bacillus subtilis (strain 168) GN=yvgN PE=1 SV=1	Cytoplasmic Protein	4	90.2
Bacillus	Firmicutes	Bacillus subtilis	sp|O94788|AL1A2_HUMAN Retinal dehydrogenase 2 OS=Homo sapiens GN=ALDH1A2 PE=1 SV=3	sp|P71016|BETB_BACSU Betaine aldehyde dehydrogenase OS=Bacillus subtilis (strain 168) GN=gbsA PE=1 SV=1	Cytoplasmic Protein	4	90.2
Bacillus	Firmicutes	Bacillus subtilis	sp|O94788|AL1A2_HUMAN Retinal dehydrogenase 2 OS=Homo sapiens GN=ALDH1A2 PE=1 SV=3	sp|P42236|ALDH1_BACSU Probable aldehyde dehydrogenase YcbD OS=Bacillus subtilis (strain 168) GN=ycbD PE=3 SV=1	Cytoplasmic Protein	4	90.2
Bacillus	Firmicutes	Bacillus licheniformis	sp|O94788|AL1A2_HUMAN Retinal dehydrogenase 2 OS=Homo sapiens GN=ALDH1A2 PE=1 SV=3	sp|Q65NN2|ROCA_BACLD 1-pyrroline-5-carboxylate dehydrogenase OS=Bacillus licheniformis (strain ATCC 14580 / DSM 13 / JCM 2505 / NBRC 12200 / NCIMB 9375 / NRRL NRS-1264 / Gibson 46) GN=rocA PE=1 SV=1	Cytoplasmic Protein	4	90.2
Bacillus	Firmicutes	Bacillus halodurans	sp|O94788|AL1A2_HUMAN Retinal dehydrogenase 2 OS=Homo sapiens GN=ALDH1A2 PE=1 SV=3	sp|Q9K9B2|ROCA1_BACHD 1-pyrroline-5-carboxylate dehydrogenase 1 OS=Bacillus halodurans (strain ATCC BAA-125 / DSM 18197 / FERM 7344 / JCM 9153 / C-125) GN=rocA1 PE=1 SV=1	Cytoplasmic Protein	1	53.1
Bacillus	Firmicutes	Bacillus subtilis	sp|O94788|AL1A2_HUMAN Retinal dehydrogenase 2 OS=Homo sapiens GN=ALDH1A2 PE=1 SV=3	sp|P94391|ROCA2_BACSU 1-pyrroline-5-carboxylate dehydrogenase 2 OS=Bacillus subtilis (strain 168) GN=putC PE=2 SV=2	Cytoplasmic Protein	4	90.2
Bacillus	Firmicutes	Bacillus halodurans	sp|O94788|AL1A2_HUMAN Retinal dehydrogenase 2 OS=Homo sapiens GN=ALDH1A2 PE=1 SV=3	sp|Q9K5Z5|ROCA2_BACHD 1-pyrroline-5-carboxylate dehydrogenase 2 OS=Bacillus halodurans (strain ATCC BAA-125 / DSM 18197 / FERM 7344 / JCM 9153 / C-125) GN=rocA2 PE=3 SV=1	Cytoplasmic Protein	4	90.2
Bacillus	Firmicutes	Bacillus pumilus	sp|O94788|AL1A2_HUMAN Retinal dehydrogenase 2 OS=Homo sapiens GN=ALDH1A2 PE=1 SV=3	sp|A8F9T1|ROCA_BACP2 1-pyrroline-5-carboxylate dehydrogenase OS=Bacillus pumilus (strain SAFR-032) GN=rocA PE=3 SV=1	Cytoplasmic Protein	4	90.2
Bacillus	Firmicutes	Bacillus subtilis	sp|P30838|AL3A1_HUMAN Aldehyde dehydrogenase, dimeric NADP-preferring OS=Homo sapiens GN=ALDH3A1 PE=1 SV=3	sp|P39634|ROCA_BACSU 1-pyrroline-5-carboxylate dehydrogenase OS=Bacillus subtilis (strain 168) GN=rocA PE=2 SV=1	Cytoplasmic Protein	4	90.2
Bacillus	Firmicutes	Bacillus pseudofirmus	sp|Q9Y4W6|AFG32_HUMAN AFG3-like protein 2 OS=Homo sapiens GN=AFG3L2 PE=1 SV=2	sp|P94304|FTSH_BACPE ATP-dependent zinc metalloprotease FtsH OS=Bacillus pseudofirmus (strain OF4) GN=ftsH PE=3 SV=2	Cytoplasmic Protein	4	90.2
Bacillus	Firmicutes	Bacillus subtilis	sp|Q9Y4W6|AFG32_HUMAN AFG3-like protein 2 OS=Homo sapiens GN=AFG3L2 PE=1 SV=2	sp|P37476|FTSH_BACSU ATP-dependent zinc metalloprotease FtsH OS=Bacillus subtilis (strain 168) GN=ftsH PE=1 SV=1	Cytoplasmic Protein	1	53.1
Bacillus	Firmicutes	Lactobacillus plantarum	sp|Q9Y4W6|AFG32_HUMAN AFG3-like protein 2 OS=Homo sapiens GN=AFG3L2 PE=1 SV=2	sp|Q88Z31|FTSH_LACPL ATP-dependent zinc metalloprotease FtsH OS=Lactobacillus plantarum (strain ATCC BAA-793 / NCIMB 8826 / WCFS1) GN=ftsH PE=2 SV=1	Cytoplasmic Protein	4	90.2
Bacillus	Firmicutes	Lactobacillus plantarum	sp|Q9Y4W6|AFG32_HUMAN AFG3-like protein 2 OS=Homo sapiens GN=AFG3L2 PE=1 SV=2	sp|C6VKW6|FTSH_LACPJ ATP-dependent zinc metalloprotease FtsH OS=Lactobacillus plantarum (strain JDM1) GN=ftsH PE=3 SV=1	Cytoplasmic Protein	4	90.2
Bacillus	Firmicutes	Bacillus thuringiensis	sp|P30038|AL4A1_HUMAN Delta-1-pyrroline-5-carboxylate dehydrogenase, mitochondrial OS=Homo sapiens GN=ALDH4A1 PE=1 SV=3	sp|Q6HP91|ROCA_BACHK 1-pyrroline-5-carboxylate dehydrogenase OS=Bacillus thuringiensis subsp. konkukian (strain 97-27) GN=rocA PE=3 SV=1	Cytoplasmic Protein	4	90.2
Bacillus	Firmicutes	Bacillus cereus	sp|P30038|AL4A1_HUMAN Delta-1-pyrroline-5-carboxylate dehydrogenase, mitochondrial OS=Homo sapiens GN=ALDH4A1 PE=1 SV=3	sp|B9J1L9|ROCA_BACCQ 1-pyrroline-5-carboxylate dehydrogenase OS=Bacillus cereus (strain Q1) GN=rocA PE=3 SV=1	Cytoplasmic Protein	4	90.2
Bacillus	Firmicutes	Bacillus cereus	sp|P30038|AL4A1_HUMAN Delta-1-pyrroline-5-carboxylate dehydrogenase, mitochondrial OS=Homo sapiens GN=ALDH4A1 PE=1 SV=3	sp|Q63GS0|ROCA_BACCZ 1-pyrroline-5-carboxylate dehydrogenase OS=Bacillus cereus (strain ZK / E33L) GN=rocA PE=3 SV=1	Cytoplasmic Protein	5	98.1
Bacillus	Firmicutes	Bacillus anthracis	sp|P30038|AL4A1_HUMAN Delta-1-pyrroline-5-carboxylate dehydrogenase, mitochondrial OS=Homo sapiens GN=ALDH4A1 PE=1 SV=3	sp|C3PBP4|ROCA_BACAA 1-pyrroline-5-carboxylate dehydrogenase OS=Bacillus anthracis (strain A0248) GN=rocA PE=3 SV=1	Cytoplasmic Protein	4	90.2
Bacillus	Firmicutes	Bacillus cereus	sp|P30038|AL4A1_HUMAN Delta-1-pyrroline-5-carboxylate dehydrogenase, mitochondrial OS=Homo sapiens GN=ALDH4A1 PE=1 SV=3	sp|B7HSW8|ROCA_BACC7 1-pyrroline-5-carboxylate dehydrogenase OS=Bacillus cereus (strain AH187) GN=rocA PE=3 SV=1	Cytoplasmic Protein	1	53.1
Bacillus	Firmicutes	Bacillus cereus	sp|P30038|AL4A1_HUMAN Delta-1-pyrroline-5-carboxylate dehydrogenase, mitochondrial OS=Homo sapiens GN=ALDH4A1 PE=1 SV=3	sp|C1EV77|ROCA_BACC3 1-pyrroline-5-carboxylate dehydrogenase OS=Bacillus cereus (strain 03BB102) GN=rocA PE=3 SV=1	Cytoplasmic Protein	1	53.1
Bacillus	Firmicutes	Bacillus cereus	sp|P30038|AL4A1_HUMAN Delta-1-pyrroline-5-carboxylate dehydrogenase, mitochondrial OS=Homo sapiens GN=ALDH4A1 PE=1 SV=3	sp|B7JM99|ROCA_BACC0 1-pyrroline-5-carboxylate dehydrogenase OS=Bacillus cereus (strain AH820) GN=rocA PE=3 SV=1	Cytoplasmic Protein	4	90.2
Bacillus	Firmicutes	Bacillus anthracis	sp|P30038|AL4A1_HUMAN Delta-1-pyrroline-5-carboxylate dehydrogenase, mitochondrial OS=Homo sapiens GN=ALDH4A1 PE=1 SV=3	sp|C3L546|ROCA_BACAC 1-pyrroline-5-carboxylate dehydrogenase OS=Bacillus anthracis (strain CDC 684 / NRRL 3495) GN=rocA PE=3 SV=1	Cytoplasmic Protein	1	53.1
Bacillus	Firmicutes	Bacillus thuringiensis	sp|P30038|AL4A1_HUMAN Delta-1-pyrroline-5-carboxylate dehydrogenase, mitochondrial OS=Homo sapiens GN=ALDH4A1 PE=1 SV=3	sp|A0R909|ROCA_BACAH 1-pyrroline-5-carboxylate dehydrogenase OS=Bacillus thuringiensis (strain Al Hakam) GN=rocA PE=3 SV=1	Cytoplasmic Protein	4	90.2
Bacillus	Firmicutes	Bacillus anthracis	sp|P30038|AL4A1_HUMAN Delta-1-pyrroline-5-carboxylate dehydrogenase, mitochondrial OS=Homo sapiens GN=ALDH4A1 PE=1 SV=3	sp|Q81ZF8|ROCA_BACAN 1-pyrroline-5-carboxylate dehydrogenase OS=Bacillus anthracis GN=rocA PE=3 SV=1	Cytoplasmic Protein	4	90.2
Bacillus	Firmicutes	Bacillus weihenstephanensis	sp|P30038|AL4A1_HUMAN Delta-1-pyrroline-5-carboxylate dehydrogenase, mitochondrial OS=Homo sapiens GN=ALDH4A1 PE=1 SV=3	sp|A9VRG6|ROCA_BACWK 1-pyrroline-5-carboxylate dehydrogenase OS=Bacillus weihenstephanensis (strain KBAB4) GN=rocA PE=3 SV=1	Cytoplasmic Protein	4	90.2
Bacillus	Firmicutes	Bacillus cereus	sp|P30038|AL4A1_HUMAN Delta-1-pyrroline-5-carboxylate dehydrogenase, mitochondrial OS=Homo sapiens GN=ALDH4A1 PE=1 SV=3	sp|P62028|ROCA_BACC1 1-pyrroline-5-carboxylate dehydrogenase OS=Bacillus cereus (strain ATCC 10987 / NRS 248) GN=rocA PE=3 SV=1	Cytoplasmic Protein	4	90.2
Bacillus	Firmicutes	Bacillus cytotoxicus	sp|P30038|AL4A1_HUMAN Delta-1-pyrroline-5-carboxylate dehydrogenase, mitochondrial OS=Homo sapiens GN=ALDH4A1 PE=1 SV=3	sp|A7GKJ4|ROCA_BACCN 1-pyrroline-5-carboxylate dehydrogenase OS=Bacillus cytotoxicus (strain DSM 22905 / CIP 110041 / 391-98 / NVH 391-98) GN=rocA PE=3 SV=1	Cytoplasmic Protein	4	90.2
Bacillus	Firmicutes	Bacillus cereus	sp|P30038|AL4A1_HUMAN Delta-1-pyrroline-5-carboxylate dehydrogenase, mitochondrial OS=Homo sapiens GN=ALDH4A1 PE=1 SV=3	sp|Q81IP0|ROCA_BACCR 1-pyrroline-5-carboxylate dehydrogenase OS=Bacillus cereus (strain ATCC 14579 / DSM 31 / JCM 2152 / NBRC 15305 / NCIMB 9373 / NRRL B-3711) GN=rocA PE=3 SV=1	Cytoplasmic Protein	1	53.1
Bacillus	Firmicutes	Bacillus cereus	sp|P30038|AL4A1_HUMAN Delta-1-pyrroline-5-carboxylate dehydrogenase, mitochondrial OS=Homo sapiens GN=ALDH4A1 PE=1 SV=3	sp|B7H4V1|ROCA_BACC4 1-pyrroline-5-carboxylate dehydrogenase OS=Bacillus cereus (strain B4264) GN=rocA PE=3 SV=1	Cytoplasmic Protein	5	98.1
Bacillus	Firmicutes	Bacillus cereus	sp|P30038|AL4A1_HUMAN Delta-1-pyrroline-5-carboxylate dehydrogenase, mitochondrial OS=Homo sapiens GN=ALDH4A1 PE=1 SV=3	sp|B7IUW8|ROCA_BACC2 1-pyrroline-5-carboxylate dehydrogenase OS=Bacillus cereus (strain G9842) GN=rocA PE=3 SV=1	Cytoplasmic Protein	1	53.1
Bacillus	Firmicutes	Bacillus subtilis	sp|Q9H6R3|ACSS3_HUMAN Acyl-CoA synthetase short-chain family member 3, mitochondrial OS=Homo sapiens GN=ACSS3 PE=1 SV=1	sp|O07610|LCFB_BACSU Long-chain-fatty-acid--CoA ligase OS=Bacillus subtilis (strain 168) GN=lcfB PE=2 SV=2	Cytoplasmic Protein	4	90.2
Bacillus	Firmicutes	Bacillus subtilis	sp|Q9BYV1|AGT2_HUMAN Alanine--glyoxylate aminotransferase 2, mitochondrial OS=Homo sapiens GN=AGXT2 PE=1 SV=1	sp|P33189|YHXA_BACSU Uncharacterized aminotransferase YhxA OS=Bacillus subtilis (strain 168) GN=yhxA PE=3 SV=4	Cytoplasmic Protein	1	53.1
Bacillus	Firmicutes	Bacillus pseudofirmus	sp|Q9BYV1|AGT2_HUMAN Alanine--glyoxylate aminotransferase 2, mitochondrial OS=Homo sapiens GN=AGXT2 PE=1 SV=1	sp|P30268|Y2045_BACPE Uncharacterized aminotransferase BpOF4_10225 OS=Bacillus pseudofirmus (strain OF4) GN=BpOF4_10225 PE=3 SV=2	Cytoplasmic Protein	1	53.1
Bacillus	Firmicutes	Bacillus cereus	sp|Q9BYV1|AGT2_HUMAN Alanine--glyoxylate aminotransferase 2, mitochondrial OS=Homo sapiens GN=AGXT2 PE=1 SV=1	sp|Q818W2|ARGD_BACCR Acetylornithine aminotransferase OS=Bacillus cereus (strain ATCC 14579 / DSM 31 / JCM 2152 / NBRC 15305 / NCIMB 9373 / NRRL B-3711) GN=argD PE=3 SV=2	Cytoplasmic Protein	1	53.1
Bacillus	Firmicutes	Bacillus subtilis	sp|Q06278|AOXA_HUMAN Aldehyde oxidase OS=Homo sapiens GN=AOX1 PE=1 SV=2	sp|O32143|XDHE_BACSU Probable xanthine dehydrogenase subunit E OS=Bacillus subtilis (strain 168) GN=pucE PE=2 SV=1	Cytoplasmic Protein	4	90.2
Bacillus	Firmicutes	Bacillus subtilis	sp|P27695|APEX1_HUMAN DNA-(apurinic or apyrimidinic site) lyase OS=Homo sapiens GN=APEX1 PE=1 SV=2	sp|P37454|EXOA_BACSU Exodeoxyribonuclease OS=Bacillus subtilis (strain 168) GN=exoA PE=1 SV=1	Cytoplasmic Protein	4	90.2
Bacillus	Firmicutes	Lactobacillus plantarum	sp|P07741|APT_HUMAN Adenine phosphoribosyltransferase OS=Homo sapiens GN=APRT PE=1 SV=2	sp|Q88VH0|APT_LACPL Adenine phosphoribosyltransferase OS=Lactobacillus plantarum (strain ATCC BAA-793 / NCIMB 8826 / WCFS1) GN=apt PE=3 SV=1	Cytoplasmic Protein	3	71.1
Bacillus	Firmicutes	Lactobacillus casei	sp|P07741|APT_HUMAN Adenine phosphoribosyltransferase OS=Homo sapiens GN=APRT PE=1 SV=2	sp|Q038P1|APT_LACC3 Adenine phosphoribosyltransferase OS=Lactobacillus casei (strain ATCC 334) GN=apt PE=3 SV=1	Cytoplasmic Protein	1	53.1
Bacillus	Firmicutes	Lactobacillus brevis	sp|P07741|APT_HUMAN Adenine phosphoribosyltransferase OS=Homo sapiens GN=APRT PE=1 SV=2	sp|Q03QP8|APT_LACBA Adenine phosphoribosyltransferase OS=Lactobacillus brevis (strain ATCC 367 / JCM 1170) GN=apt PE=3 SV=1	Cytoplasmic Protein	4	90.2
Bacillus	Firmicutes	Lactobacillus sakei	sp|P07741|APT_HUMAN Adenine phosphoribosyltransferase OS=Homo sapiens GN=APRT PE=1 SV=2	sp|Q38W53|APT_LACSS Adenine phosphoribosyltransferase OS=Lactobacillus sakei subsp. sakei (strain 23K) GN=apt PE=3 SV=1	Cytoplasmic Protein	4	90.2
Bacillus	Firmicutes	Lactobacillus salivarius	sp|P07741|APT_HUMAN Adenine phosphoribosyltransferase OS=Homo sapiens GN=APRT PE=1 SV=2	sp|Q1WT53|APT_LACS1 Adenine phosphoribosyltransferase OS=Lactobacillus salivarius (strain UCC118) GN=apt PE=3 SV=1	Cytoplasmic Protein	1	53.1
Bacillus	Firmicutes	Bacillus clausii	sp|P07741|APT_HUMAN Adenine phosphoribosyltransferase OS=Homo sapiens GN=APRT PE=1 SV=2	sp|Q5WHQ1|APT_BACSK Adenine phosphoribosyltransferase OS=Bacillus clausii (strain KSM-K16) GN=apt PE=3 SV=1	Cytoplasmic Protein	4	90.2
Bacillus	Firmicutes	Bacillus halodurans	sp|P07741|APT_HUMAN Adenine phosphoribosyltransferase OS=Homo sapiens GN=APRT PE=1 SV=2	sp|Q9KDH2|APT_BACHD Adenine phosphoribosyltransferase OS=Bacillus halodurans (strain ATCC BAA-125 / DSM 18197 / FERM 7344 / JCM 9153 / C-125) GN=apt PE=3 SV=1	Cytoplasmic Protein	4	90.2
Bacillus	Firmicutes	Bacillus pumilus	sp|P07741|APT_HUMAN Adenine phosphoribosyltransferase OS=Homo sapiens GN=APRT PE=1 SV=2	sp|A8FFQ0|APT_BACP2 Adenine phosphoribosyltransferase OS=Bacillus pumilus (strain SAFR-032) GN=apt PE=3 SV=1	Cytoplasmic Protein	1	53.1
Bacillus	Firmicutes	Bacillus cytotoxicus	sp|P07741|APT_HUMAN Adenine phosphoribosyltransferase OS=Homo sapiens GN=APRT PE=1 SV=2	sp|A7GT90|APT_BACCN Adenine phosphoribosyltransferase OS=Bacillus cytotoxicus (strain DSM 22905 / CIP 110041 / 391-98 / NVH 391-98) GN=apt PE=3 SV=1	Cytoplasmic Protein	4	90.2
Bacillus	Firmicutes	Bacillus licheniformis	sp|P07741|APT_HUMAN Adenine phosphoribosyltransferase OS=Homo sapiens GN=APRT PE=1 SV=2	sp|Q65GQ8|APT_BACLD Adenine phosphoribosyltransferase OS=Bacillus licheniformis (strain ATCC 14580 / DSM 13 / JCM 2505 / NBRC 12200 / NCIMB 9375 / NRRL NRS-1264 / Gibson 46) GN=apt PE=3 SV=1	Cytoplasmic Protein	4	90.2
Bacillus	Firmicutes	Bacillus subtilis	sp|P07741|APT_HUMAN Adenine phosphoribosyltransferase OS=Homo sapiens GN=APRT PE=1 SV=2	sp|O34443|APT_BACSU Adenine phosphoribosyltransferase OS=Bacillus subtilis (strain 168) GN=apt PE=3 SV=1	Cytoplasmic Protein	4	90.2
Bacillus	Firmicutes	Bacillus cereus	sp|P07741|APT_HUMAN Adenine phosphoribosyltransferase OS=Homo sapiens GN=APRT PE=1 SV=2	sp|B7HE42|APT_BACC4 Adenine phosphoribosyltransferase OS=Bacillus cereus (strain B4264) GN=apt PE=3 SV=1	Cytoplasmic Protein	4	90.2
Bacillus	Firmicutes	Bacillus cereus	sp|P07741|APT_HUMAN Adenine phosphoribosyltransferase OS=Homo sapiens GN=APRT PE=1 SV=2	sp|Q634D6|APT_BACCZ Adenine phosphoribosyltransferase OS=Bacillus cereus (strain ZK / E33L) GN=apt PE=3 SV=1	Cytoplasmic Protein	4	90.2
Bacillus	Firmicutes	Bacillus cereus	sp|P07741|APT_HUMAN Adenine phosphoribosyltransferase OS=Homo sapiens GN=APRT PE=1 SV=2	sp|Q817X3|APT_BACCR Adenine phosphoribosyltransferase OS=Bacillus cereus (strain ATCC 14579 / DSM 31 / JCM 2152 / NBRC 15305 / NCIMB 9373 / NRRL B-3711) GN=apt PE=3 SV=1	Cytoplasmic Protein	4	90.2
Bacillus	Firmicutes	Bacillus cereus	sp|P07741|APT_HUMAN Adenine phosphoribosyltransferase OS=Homo sapiens GN=APRT PE=1 SV=2	sp|B7IIS0|APT_BACC2 Adenine phosphoribosyltransferase OS=Bacillus cereus (strain G9842) GN=apt PE=3 SV=1	Cytoplasmic Protein	4	90.2
Bacillus	Firmicutes	Bacillus cereus	sp|P07741|APT_HUMAN Adenine phosphoribosyltransferase OS=Homo sapiens GN=APRT PE=1 SV=2	sp|Q730C4|APT_BACC1 Adenine phosphoribosyltransferase OS=Bacillus cereus (strain ATCC 10987 / NRS 248) GN=apt PE=3 SV=1	Cytoplasmic Protein	4	90.2
Bacillus	Firmicutes	Bacillus anthracis	sp|P07741|APT_HUMAN Adenine phosphoribosyltransferase OS=Homo sapiens GN=APRT PE=1 SV=2	sp|Q81LI1|APT_BACAN Adenine phosphoribosyltransferase OS=Bacillus anthracis GN=apt PE=3 SV=1	Cytoplasmic Protein	4	90.2
Bacillus	Firmicutes	Bacillus thuringiensis	sp|P07741|APT_HUMAN Adenine phosphoribosyltransferase OS=Homo sapiens GN=APRT PE=1 SV=2	sp|Q6HDB8|APT_BACHK Adenine phosphoribosyltransferase OS=Bacillus thuringiensis subsp. konkukian (strain 97-27) GN=apt PE=3 SV=1	Cytoplasmic Protein	4	90.2
Bacillus	Firmicutes	Bacillus cereus	sp|P07741|APT_HUMAN Adenine phosphoribosyltransferase OS=Homo sapiens GN=APRT PE=1 SV=2	sp|B7HQG7|APT_BACC7 Adenine phosphoribosyltransferase OS=Bacillus cereus (strain AH187) GN=apt PE=3 SV=1	Cytoplasmic Protein	2	68.1
Bacillus	Firmicutes	Bacillus thuringiensis	sp|P07741|APT_HUMAN Adenine phosphoribosyltransferase OS=Homo sapiens GN=APRT PE=1 SV=2	sp|A0RJ16|APT_BACAH Adenine phosphoribosyltransferase OS=Bacillus thuringiensis (strain Al Hakam) GN=apt PE=3 SV=1	Cytoplasmic Protein	4	90.2
Bacillus	Firmicutes	Bacillus anthracis	sp|P07741|APT_HUMAN Adenine phosphoribosyltransferase OS=Homo sapiens GN=APRT PE=1 SV=2	sp|C3L613|APT_BACAC Adenine phosphoribosyltransferase OS=Bacillus anthracis (strain CDC 684 / NRRL 3495) GN=apt PE=3 SV=1	Cytoplasmic Protein	1	53.1
Bacillus	Firmicutes	Bacillus anthracis	sp|P07741|APT_HUMAN Adenine phosphoribosyltransferase OS=Homo sapiens GN=APRT PE=1 SV=2	sp|C3P995|APT_BACAA Adenine phosphoribosyltransferase OS=Bacillus anthracis (strain A0248) GN=apt PE=3 SV=1	Cytoplasmic Protein	4	90.2
Bacillus	Firmicutes	Bacillus cereus	sp|P07741|APT_HUMAN Adenine phosphoribosyltransferase OS=Homo sapiens GN=APRT PE=1 SV=2	sp|B9IYY2|APT_BACCQ Adenine phosphoribosyltransferase OS=Bacillus cereus (strain Q1) GN=apt PE=3 SV=1	Cytoplasmic Protein	4	90.2
Bacillus	Firmicutes	Bacillus cereus	sp|P07741|APT_HUMAN Adenine phosphoribosyltransferase OS=Homo sapiens GN=APRT PE=1 SV=2	sp|B7JPZ4|APT_BACC0 Adenine phosphoribosyltransferase OS=Bacillus cereus (strain AH820) GN=apt PE=3 SV=1	Cytoplasmic Protein	4	90.2
Bacillus	Firmicutes	Lactobacillus casei	sp|P00352|AL1A1_HUMAN Retinal dehydrogenase 1 OS=Homo sapiens GN=ALDH1A1 PE=1 SV=2	sp|A5YBJ3|IOLA_LACCA Methylmalonate semialdehyde dehydrogenase [acylating] OS=Lactobacillus casei GN=iolA PE=3 SV=1	Cytoplasmic Protein	4	90.2
Bacillus	Firmicutes	Lactobacillus helveticus	sp|P15144|AMPN_HUMAN Aminopeptidase N OS=Homo sapiens GN=ANPEP PE=1 SV=4	sp|Q10730|AMPN_LACHE Aminopeptidase N OS=Lactobacillus helveticus GN=pepN PE=3 SV=1	Cytoplasmic Protein	1	53.1
Bacillus	Firmicutes	Lactobacillus delbrueckii	sp|P15144|AMPN_HUMAN Aminopeptidase N OS=Homo sapiens GN=ANPEP PE=1 SV=4	sp|P37896|AMPN_LACDL Aminopeptidase N OS=Lactobacillus delbrueckii subsp. lactis GN=pepN PE=1 SV=3	Cytoplasmic Protein	4	90.2
Bacillus	Firmicutes	Bacillus subtilis	sp|P29972|AQP1_HUMAN Aquaporin-1 OS=Homo sapiens GN=AQP1 PE=1 SV=3	sp|P18156|GLPF_BACSU Glycerol uptake facilitator protein OS=Bacillus subtilis (strain 168) GN=glpF PE=2 SV=2	Cytoplasmic Protein	4	90.2
Bacillus	Firmicutes	Bacillus methylotrophicus	sp|P04424|ARLY_HUMAN Argininosuccinate lyase OS=Homo sapiens GN=ASL PE=1 SV=4	sp|A7Z7L9|ARLY_BACMF Argininosuccinate lyase OS=Bacillus methylotrophicus (strain DSM 23117 / BGSC 10A6 / FZB42) GN=argH PE=3 SV=1	Cytoplasmic Protein	4	90.2
Bacillus	Firmicutes	Bacillus subtilis	sp|P04424|ARLY_HUMAN Argininosuccinate lyase OS=Homo sapiens GN=ASL PE=1 SV=4	sp|O34858|ARLY_BACSU Argininosuccinate lyase OS=Bacillus subtilis (strain 168) GN=argH PE=3 SV=1	Cytoplasmic Protein	4	90.2
Bacillus	Firmicutes	Bacillus cytotoxicus	sp|P04424|ARLY_HUMAN Argininosuccinate lyase OS=Homo sapiens GN=ASL PE=1 SV=4	sp|A7GTR4|ARLY_BACCN Argininosuccinate lyase OS=Bacillus cytotoxicus (strain DSM 22905 / CIP 110041 / 391-98 / NVH 391-98) GN=argH PE=3 SV=1	Cytoplasmic Protein	4	90.2
Bacillus	Firmicutes	Bacillus weihenstephanensis	sp|P04424|ARLY_HUMAN Argininosuccinate lyase OS=Homo sapiens GN=ASL PE=1 SV=4	sp|A9VKE0|ARLY_BACWK Argininosuccinate lyase OS=Bacillus weihenstephanensis (strain KBAB4) GN=argH PE=3 SV=1	Cytoplasmic Protein	1	53.1
Bacillus	Firmicutes	Bacillus cereus	sp|P04424|ARLY_HUMAN Argininosuccinate lyase OS=Homo sapiens GN=ASL PE=1 SV=4	sp|B7IK28|ARLY_BACC2 Argininosuccinate lyase OS=Bacillus cereus (strain G9842) GN=argH PE=3 SV=1	Cytoplasmic Protein	1	53.1
Bacillus	Firmicutes	Bacillus thuringiensis	sp|P04424|ARLY_HUMAN Argininosuccinate lyase OS=Homo sapiens GN=ASL PE=1 SV=4	sp|Q6HCP8|ARLY_BACHK Argininosuccinate lyase OS=Bacillus thuringiensis subsp. konkukian (strain 97-27) GN=argH PE=3 SV=1	Cytoplasmic Protein	4	90.2
Bacillus	Firmicutes	Bacillus licheniformis	sp|P04424|ARLY_HUMAN Argininosuccinate lyase OS=Homo sapiens GN=ASL PE=1 SV=4	sp|Q65G68|ARLY_BACLD Argininosuccinate lyase OS=Bacillus licheniformis (strain ATCC 14580 / DSM 13 / JCM 2505 / NBRC 12200 / NCIMB 9375 / NRRL NRS-1264 / Gibson 46) GN=argH PE=3 SV=1	Cytoplasmic Protein	4	90.2
Bacillus	Firmicutes	Bacillus anthracis	sp|P04424|ARLY_HUMAN Argininosuccinate lyase OS=Homo sapiens GN=ASL PE=1 SV=4	sp|C3L913|ARLY_BACAC Argininosuccinate lyase OS=Bacillus anthracis (strain CDC 684 / NRRL 3495) GN=argH PE=3 SV=1	Cytoplasmic Protein	1	53.1
Bacillus	Firmicutes	Bacillus anthracis	sp|P04424|ARLY_HUMAN Argininosuccinate lyase OS=Homo sapiens GN=ASL PE=1 SV=4	sp|Q81KV8|ARLY_BACAN Argininosuccinate lyase OS=Bacillus anthracis GN=argH-2 PE=3 SV=1	Cytoplasmic Protein	4	90.2
Bacillus	Firmicutes	Bacillus anthracis	sp|P04424|ARLY_HUMAN Argininosuccinate lyase OS=Homo sapiens GN=ASL PE=1 SV=4	sp|C3PB96|ARLY_BACAA Argininosuccinate lyase OS=Bacillus anthracis (strain A0248) GN=argH PE=3 SV=1	Cytoplasmic Protein	5	98.1
Bacillus	Firmicutes	Bacillus halodurans	sp|P04424|ARLY_HUMAN Argininosuccinate lyase OS=Homo sapiens GN=ASL PE=1 SV=4	sp|Q9K821|ARLY_BACHD Argininosuccinate lyase OS=Bacillus halodurans (strain ATCC BAA-125 / DSM 18197 / FERM 7344 / JCM 9153 / C-125) GN=argH PE=3 SV=1	Cytoplasmic Protein	4	90.2
Bacillus	Firmicutes	Bacillus cereus	sp|P04424|ARLY_HUMAN Argininosuccinate lyase OS=Homo sapiens GN=ASL PE=1 SV=4	sp|Q633G5|ARLY_BACCZ Argininosuccinate lyase OS=Bacillus cereus (strain ZK / E33L) GN=argH PE=3 SV=1	Cytoplasmic Protein	4	90.2
Bacillus	Firmicutes	Bacillus cereus	sp|P04424|ARLY_HUMAN Argininosuccinate lyase OS=Homo sapiens GN=ASL PE=1 SV=4	sp|Q817C7|ARLY_BACCR Argininosuccinate lyase OS=Bacillus cereus (strain ATCC 14579 / DSM 31 / JCM 2152 / NBRC 15305 / NCIMB 9373 / NRRL B-3711) GN=argH PE=3 SV=1	Cytoplasmic Protein	4	90.2
Bacillus	Firmicutes	Bacillus cereus	sp|P04424|ARLY_HUMAN Argininosuccinate lyase OS=Homo sapiens GN=ASL PE=1 SV=4	sp|B7HRS6|ARLY_BACC7 Argininosuccinate lyase OS=Bacillus cereus (strain AH187) GN=argH PE=3 SV=1	Cytoplasmic Protein	1	53.1
Bacillus	Firmicutes	Bacillus cereus	sp|P04424|ARLY_HUMAN Argininosuccinate lyase OS=Homo sapiens GN=ASL PE=1 SV=4	sp|Q72ZA4|ARLY_BACC1 Argininosuccinate lyase OS=Bacillus cereus (strain ATCC 10987 / NRS 248) GN=argH PE=3 SV=1	Cytoplasmic Protein	1	53.1
Bacillus	Firmicutes	Bacillus cereus	sp|P04424|ARLY_HUMAN Argininosuccinate lyase OS=Homo sapiens GN=ASL PE=1 SV=4	sp|B7H6Y4|ARLY_BACC4 Argininosuccinate lyase OS=Bacillus cereus (strain B4264) GN=argH PE=3 SV=1	Cytoplasmic Protein	4	90.2
Bacillus	Firmicutes	Bacillus cereus	sp|P04424|ARLY_HUMAN Argininosuccinate lyase OS=Homo sapiens GN=ASL PE=1 SV=4	sp|B7JS05|ARLY_BACC0 Argininosuccinate lyase OS=Bacillus cereus (strain AH820) GN=argH PE=3 SV=1	Cytoplasmic Protein	5	98.1
Bacillus	Firmicutes	Bacillus thuringiensis	sp|P04424|ARLY_HUMAN Argininosuccinate lyase OS=Homo sapiens GN=ASL PE=1 SV=4	sp|A0RJM3|ARLY_BACAH Argininosuccinate lyase OS=Bacillus thuringiensis (strain Al Hakam) GN=argH PE=3 SV=1	Cytoplasmic Protein	4	90.2
Bacillus	Firmicutes	Bacillus pumilus	sp|P04424|ARLY_HUMAN Argininosuccinate lyase OS=Homo sapiens GN=ASL PE=1 SV=4	sp|A8FG69|ARLY_BACP2 Argininosuccinate lyase OS=Bacillus pumilus (strain SAFR-032) GN=argH PE=3 SV=1	Cytoplasmic Protein	4	90.2
Bacillus	Firmicutes	Lactobacillus plantarum	sp|P04424|ARLY_HUMAN Argininosuccinate lyase OS=Homo sapiens GN=ASL PE=1 SV=4	sp|P59617|ARLY_LACPL Argininosuccinate lyase OS=Lactobacillus plantarum (strain ATCC BAA-793 / NCIMB 8826 / WCFS1) GN=argH PE=3 SV=1	Cytoplasmic Protein	4	90.2
Bacillus	Firmicutes	Lactobacillus fermentum	sp|P04424|ARLY_HUMAN Argininosuccinate lyase OS=Homo sapiens GN=ASL PE=1 SV=4	sp|B2GE78|ARLY_LACF3 Argininosuccinate lyase OS=Lactobacillus fermentum (strain NBRC 3956 / LMG 18251) GN=argH PE=3 SV=1	Cytoplasmic Protein	4	90.2
Bacillus	Firmicutes	Lactobacillus reuteri	sp|P04424|ARLY_HUMAN Argininosuccinate lyase OS=Homo sapiens GN=ASL PE=1 SV=4	sp|A5VJH2|ARLY_LACRD Argininosuccinate lyase OS=Lactobacillus reuteri (strain DSM 20016) GN=argH PE=3 SV=1	Cytoplasmic Protein	4	90.2
Bacillus	Firmicutes	Lactobacillus reuteri	sp|P04424|ARLY_HUMAN Argininosuccinate lyase OS=Homo sapiens GN=ASL PE=1 SV=4	sp|B2G6Y7|ARLY_LACRJ Argininosuccinate lyase OS=Lactobacillus reuteri (strain JCM 1112) GN=argH PE=3 SV=1	Cytoplasmic Protein	4	90.2
Bacillus	Firmicutes	Lactobacillus salivarius	sp|P04424|ARLY_HUMAN Argininosuccinate lyase OS=Homo sapiens GN=ASL PE=1 SV=4	sp|Q1WV66|ARLY_LACS1 Argininosuccinate lyase OS=Lactobacillus salivarius (strain UCC118) GN=argH PE=3 SV=1	Cytoplasmic Protein	4	90.2
Bacillus	Firmicutes	Bacillus clausii	sp|P04424|ARLY_HUMAN Argininosuccinate lyase OS=Homo sapiens GN=ASL PE=1 SV=4	sp|Q5WED9|ARLY2_BACSK Argininosuccinate lyase 2 OS=Bacillus clausii (strain KSM-K16) GN=argH2 PE=3 SV=1	Cytoplasmic Protein	1	53.1
Bacillus	Firmicutes	Bacillus cereus	sp|Q4VNC0|AT135_HUMAN Probable cation-transporting ATPase 13A5 OS=Homo sapiens GN=ATP13A5 PE=2 SV=1	sp|Q73E41|BACA1_BACC1 Calcium-transporting ATPase 1 OS=Bacillus cereus (strain ATCC 10987 / NRS 248) GN=BCE_0519 PE=1 SV=1	Cytoplasmic Protein	4	90.2
Bacillus	Firmicutes	Bacillus subtilis	sp|Q01814|AT2B2_HUMAN Plasma membrane calcium-transporting ATPase 2 OS=Homo sapiens GN=ATP2B2 PE=1 SV=2	sp|O34431|ATCL_BACSU Calcium-transporting ATPase OS=Bacillus subtilis (strain 168) GN=yloB PE=1 SV=1	Cytoplasmic Protein	4	90.2
Bacillus	Firmicutes	Lactobacillus salivarius	sp|P00966|ASSY_HUMAN Argininosuccinate synthase OS=Homo sapiens GN=ASS1 PE=1 SV=2	sp|Q1WV65|ASSY_LACS1 Argininosuccinate synthase OS=Lactobacillus salivarius (strain UCC118) GN=argG PE=3 SV=1	Cytoplasmic Protein	4	90.2
Bacillus	Firmicutes	Bacillus halodurans	sp|P00966|ASSY_HUMAN Argininosuccinate synthase OS=Homo sapiens GN=ASS1 PE=1 SV=2	sp|Q9K820|ASSY_BACHD Argininosuccinate synthase OS=Bacillus halodurans (strain ATCC BAA-125 / DSM 18197 / FERM 7344 / JCM 9153 / C-125) GN=argG PE=3 SV=1	Cytoplasmic Protein	1	53.1
Bacillus	Firmicutes	Bacillus pumilus	sp|P00966|ASSY_HUMAN Argininosuccinate synthase OS=Homo sapiens GN=ASS1 PE=1 SV=2	sp|A8FG70|ASSY_BACP2 Argininosuccinate synthase OS=Bacillus pumilus (strain SAFR-032) GN=argG PE=3 SV=1	Cytoplasmic Protein	4	90.2
Bacillus	Firmicutes	Bacillus licheniformis	sp|P00966|ASSY_HUMAN Argininosuccinate synthase OS=Homo sapiens GN=ASS1 PE=1 SV=2	sp|Q65G67|ASSY_BACLD Argininosuccinate synthase OS=Bacillus licheniformis (strain ATCC 14580 / DSM 13 / JCM 2505 / NBRC 12200 / NCIMB 9375 / NRRL NRS-1264 / Gibson 46) GN=argG PE=3 SV=1	Cytoplasmic Protein	1	53.1
Bacillus	Firmicutes	Bacillus clausii	sp|P00966|ASSY_HUMAN Argininosuccinate synthase OS=Homo sapiens GN=ASS1 PE=1 SV=2	sp|Q5WED8|ASSY_BACSK Argininosuccinate synthase OS=Bacillus clausii (strain KSM-K16) GN=argG PE=3 SV=1	Cytoplasmic Protein	4	90.2
Bacillus	Firmicutes	Lactobacillus plantarum	sp|P00966|ASSY_HUMAN Argininosuccinate synthase OS=Homo sapiens GN=ASS1 PE=1 SV=2	sp|P59603|ASSY_LACPL Argininosuccinate synthase OS=Lactobacillus plantarum (strain ATCC BAA-793 / NCIMB 8826 / WCFS1) GN=argG PE=3 SV=1	Cytoplasmic Protein	4	90.2
Bacillus	Firmicutes	Bacillus subtilis	sp|P00966|ASSY_HUMAN Argininosuccinate synthase OS=Homo sapiens GN=ASS1 PE=1 SV=2	sp|O34347|ASSY_BACSU Argininosuccinate synthase OS=Bacillus subtilis (strain 168) GN=argG PE=3 SV=1	Cytoplasmic Protein	4	90.2
Bacillus	Firmicutes	Bacillus cytotoxicus	sp|P00966|ASSY_HUMAN Argininosuccinate synthase OS=Homo sapiens GN=ASS1 PE=1 SV=2	sp|A7GTR5|ASSY_BACCN Argininosuccinate synthase OS=Bacillus cytotoxicus (strain DSM 22905 / CIP 110041 / 391-98 / NVH 391-98) GN=argG PE=3 SV=1	Cytoplasmic Protein	1	53.1
Bacillus	Firmicutes	Lactobacillus reuteri	sp|P00966|ASSY_HUMAN Argininosuccinate synthase OS=Homo sapiens GN=ASS1 PE=1 SV=2	sp|B2G6Y6|ASSY_LACRJ Argininosuccinate synthase OS=Lactobacillus reuteri (strain JCM 1112) GN=argG PE=3 SV=1	Cytoplasmic Protein	4	90.2
Bacillus	Firmicutes	Lactobacillus reuteri	sp|P00966|ASSY_HUMAN Argininosuccinate synthase OS=Homo sapiens GN=ASS1 PE=1 SV=2	sp|A5VJH1|ASSY_LACRD Argininosuccinate synthase OS=Lactobacillus reuteri (strain DSM 20016) GN=argG PE=3 SV=1	Cytoplasmic Protein	4	90.2
Bacillus	Firmicutes	Bacillus cereus	sp|P00966|ASSY_HUMAN Argininosuccinate synthase OS=Homo sapiens GN=ASS1 PE=1 SV=2	sp|Q633G4|ASSY_BACCZ Argininosuccinate synthase OS=Bacillus cereus (strain ZK / E33L) GN=argG PE=3 SV=1	Cytoplasmic Protein	1	53.1
Bacillus	Firmicutes	Bacillus cereus	sp|P00966|ASSY_HUMAN Argininosuccinate synthase OS=Homo sapiens GN=ASS1 PE=1 SV=2	sp|C1EUX9|ASSY_BACC3 Argininosuccinate synthase OS=Bacillus cereus (strain 03BB102) GN=argG PE=3 SV=1	Cytoplasmic Protein	4	90.2
Bacillus	Firmicutes	Bacillus thuringiensis	sp|P00966|ASSY_HUMAN Argininosuccinate synthase OS=Homo sapiens GN=ASS1 PE=1 SV=2	sp|A0RJM4|ASSY_BACAH Argininosuccinate synthase OS=Bacillus thuringiensis (strain Al Hakam) GN=argG PE=3 SV=2	Cytoplasmic Protein	4	90.2
Bacillus	Firmicutes	Bacillus anthracis	sp|P00966|ASSY_HUMAN Argininosuccinate synthase OS=Homo sapiens GN=ASS1 PE=1 SV=2	sp|Q81KV7|ASSY_BACAN Argininosuccinate synthase OS=Bacillus anthracis GN=argG PE=3 SV=1	Cytoplasmic Protein	1	53.1
Bacillus	Firmicutes	Bacillus anthracis	sp|P00966|ASSY_HUMAN Argininosuccinate synthase OS=Homo sapiens GN=ASS1 PE=1 SV=2	sp|C3L9T6|ASSY_BACAC Argininosuccinate synthase OS=Bacillus anthracis (strain CDC 684 / NRRL 3495) GN=argG PE=3 SV=1	Cytoplasmic Protein	4	90.2
Bacillus	Firmicutes	Bacillus anthracis	sp|P00966|ASSY_HUMAN Argininosuccinate synthase OS=Homo sapiens GN=ASS1 PE=1 SV=2	sp|C3PB97|ASSY_BACAA Argininosuccinate synthase OS=Bacillus anthracis (strain A0248) GN=argG PE=3 SV=1	Cytoplasmic Protein	4	90.2
Bacillus	Firmicutes	Bacillus methylotrophicus	sp|P00966|ASSY_HUMAN Argininosuccinate synthase OS=Homo sapiens GN=ASS1 PE=1 SV=2	sp|A7Z7M0|ASSY_BACMF Argininosuccinate synthase OS=Bacillus methylotrophicus (strain DSM 23117 / BGSC 10A6 / FZB42) GN=argG PE=3 SV=1	Cytoplasmic Protein	4	90.2
Bacillus	Firmicutes	Bacillus thuringiensis	sp|P00966|ASSY_HUMAN Argininosuccinate synthase OS=Homo sapiens GN=ASS1 PE=1 SV=2	sp|Q6HCP7|ASSY_BACHK Argininosuccinate synthase OS=Bacillus thuringiensis subsp. konkukian (strain 97-27) GN=argG PE=3 SV=1	Cytoplasmic Protein	4	90.2
Bacillus	Firmicutes	Bacillus cereus	sp|P00966|ASSY_HUMAN Argininosuccinate synthase OS=Homo sapiens GN=ASS1 PE=1 SV=2	sp|B7JS06|ASSY_BACC0 Argininosuccinate synthase OS=Bacillus cereus (strain AH820) GN=argG PE=3 SV=1	Cytoplasmic Protein	4	90.2
Bacillus	Firmicutes	Bacillus cereus	sp|P00966|ASSY_HUMAN Argininosuccinate synthase OS=Homo sapiens GN=ASS1 PE=1 SV=2	sp|B9J0E1|ASSY_BACCQ Argininosuccinate synthase OS=Bacillus cereus (strain Q1) GN=argG PE=3 SV=1	Cytoplasmic Protein	4	90.2
Bacillus	Firmicutes	Bacillus cereus	sp|P00966|ASSY_HUMAN Argininosuccinate synthase OS=Homo sapiens GN=ASS1 PE=1 SV=2	sp|P61520|ASSY_BACC1 Argininosuccinate synthase OS=Bacillus cereus (strain ATCC 10987 / NRS 248) GN=argG PE=3 SV=1	Cytoplasmic Protein	4	90.2
Bacillus	Firmicutes	Bacillus weihenstephanensis	sp|P00966|ASSY_HUMAN Argininosuccinate synthase OS=Homo sapiens GN=ASS1 PE=1 SV=2	sp|A9VKE1|ASSY_BACWK Argininosuccinate synthase OS=Bacillus weihenstephanensis (strain KBAB4) GN=argG PE=3 SV=1	Cytoplasmic Protein	5	98.1
Bacillus	Firmicutes	Bacillus cereus	sp|P00966|ASSY_HUMAN Argininosuccinate synthase OS=Homo sapiens GN=ASS1 PE=1 SV=2	sp|B7HRS7|ASSY_BACC7 Argininosuccinate synthase OS=Bacillus cereus (strain AH187) GN=argG PE=3 SV=1	Cytoplasmic Protein	1	53.1
Bacillus	Firmicutes	Bacillus cereus	sp|P00966|ASSY_HUMAN Argininosuccinate synthase OS=Homo sapiens GN=ASS1 PE=1 SV=2	sp|Q817C6|ASSY_BACCR Argininosuccinate synthase OS=Bacillus cereus (strain ATCC 14579 / DSM 31 / JCM 2152 / NBRC 15305 / NCIMB 9373 / NRRL B-3711) GN=argG PE=3 SV=1	Cytoplasmic Protein	1	53.1
Bacillus	Firmicutes	Bacillus cereus	sp|P00966|ASSY_HUMAN Argininosuccinate synthase OS=Homo sapiens GN=ASS1 PE=1 SV=2	sp|B7H6Y5|ASSY_BACC4 Argininosuccinate synthase OS=Bacillus cereus (strain B4264) GN=argG PE=3 SV=1	Cytoplasmic Protein	1	53.1
Bacillus	Firmicutes	Bacillus cereus	sp|P00966|ASSY_HUMAN Argininosuccinate synthase OS=Homo sapiens GN=ASS1 PE=1 SV=2	sp|B7IK29|ASSY_BACC2 Argininosuccinate synthase OS=Bacillus cereus (strain G9842) GN=argG PE=3 SV=1	Cytoplasmic Protein	1	53.1
Bacillus	Firmicutes	Lactobacillus casei	sp|P00966|ASSY_HUMAN Argininosuccinate synthase OS=Homo sapiens GN=ASS1 PE=1 SV=2	sp|Q033U7|ASSY_LACC3 Argininosuccinate synthase OS=Lactobacillus casei (strain ATCC 334) GN=argG PE=3 SV=1	Cytoplasmic Protein	4	90.2
Bacillus	Firmicutes	Bacillus subtilis	sp|Q9NQ11|AT132_HUMAN Probable cation-transporting ATPase 13A2 OS=Homo sapiens GN=ATP13A2 PE=1 SV=2	sp|O31688|ZOSA_BACSU Zinc-transporting ATPase OS=Bacillus subtilis (strain 168) GN=zosA PE=1 SV=1	Inner-membrane Protein	3	71.1
Bacillus	Firmicutes	Bacillus subtilis	sp|P08243|ASNS_HUMAN Asparagine synthetase [glutamine-hydrolyzing] OS=Homo sapiens GN=ASNS PE=1 SV=4	sp|P54420|ASNB_BACSU Asparagine synthetase [glutamine-hydrolyzing] 1 OS=Bacillus subtilis (strain 168) GN=asnB PE=1 SV=2	Cytoplasmic Protein	4	90.2
Bacillus	Firmicutes	Bacillus pseudofirmus	sp|O14983|AT2A1_HUMAN Sarcoplasmic/endoplasmic reticulum calcium ATPase 1 OS=Homo sapiens GN=ATP2A1 PE=1 SV=1	sp|P30336|CADA_BACPE Probable cadmium-transporting ATPase OS=Bacillus pseudofirmus (strain OF4) GN=cadA PE=3 SV=2	Cytoplasmic Protein	4	90.2
Bacillus	Firmicutes	Bacillus pumilus	sp|O95671|ASML_HUMAN N-acetylserotonin O-methyltransferase-like protein OS=Homo sapiens GN=ASMTL PE=1 SV=3	sp|A8FFU1|MAF_BACP2 Septum formation protein Maf OS=Bacillus pumilus (strain SAFR-032) GN=maf PE=3 SV=1	Cytoplasmic Protein	4	90.2
Bacillus	Firmicutes	Bacillus clausii	sp|P25705|ATPA_HUMAN ATP synthase subunit alpha, mitochondrial OS=Homo sapiens GN=ATP5A1 PE=1 SV=1	sp|Q5WB76|ATPA_BACSK ATP synthase subunit alpha OS=Bacillus clausii (strain KSM-K16) GN=atpA PE=3 SV=1	Cytoplasmic Protein	1	53.1
Bacillus	Firmicutes	Bacillus halodurans	sp|P25705|ATPA_HUMAN ATP synthase subunit alpha, mitochondrial OS=Homo sapiens GN=ATP5A1 PE=1 SV=1	sp|Q9K6H3|ATPA_BACHD ATP synthase subunit alpha OS=Bacillus halodurans (strain ATCC BAA-125 / DSM 18197 / FERM 7344 / JCM 9153 / C-125) GN=atpA PE=3 SV=1	Cytoplasmic Protein	4	90.2
Bacillus	Firmicutes	Bacillus pseudofirmus	sp|P25705|ATPA_HUMAN ATP synthase subunit alpha, mitochondrial OS=Homo sapiens GN=ATP5A1 PE=1 SV=1	sp|P22477|ATPA_BACPE ATP synthase subunit alpha OS=Bacillus pseudofirmus (strain OF4) GN=atpA PE=3 SV=2	Cytoplasmic Protein	4	90.2
Bacillus	Firmicutes	Bacillus megaterium	sp|P25705|ATPA_HUMAN ATP synthase subunit alpha, mitochondrial OS=Homo sapiens GN=ATP5A1 PE=1 SV=1	sp|P17674|ATPA_BACMQ ATP synthase subunit alpha OS=Bacillus megaterium (strain ATCC 12872 / QMB1551) GN=atpA PE=3 SV=1	Cytoplasmic Protein	4	90.2
Bacillus	Firmicutes	Bacillus pumilus	sp|P25705|ATPA_HUMAN ATP synthase subunit alpha, mitochondrial OS=Homo sapiens GN=ATP5A1 PE=1 SV=1	sp|A8FIB4|ATPA_BACP2 ATP synthase subunit alpha OS=Bacillus pumilus (strain SAFR-032) GN=atpA PE=3 SV=1	Cytoplasmic Protein	1	53.1
Bacillus	Firmicutes	Bacillus licheniformis	sp|P25705|ATPA_HUMAN ATP synthase subunit alpha, mitochondrial OS=Homo sapiens GN=ATP5A1 PE=1 SV=1	sp|Q65DX2|ATPA_BACLD ATP synthase subunit alpha OS=Bacillus licheniformis (strain ATCC 14580 / DSM 13 / JCM 2505 / NBRC 12200 / NCIMB 9375 / NRRL NRS-1264 / Gibson 46) GN=atpA PE=3 SV=1	Cytoplasmic Protein	1	53.1
Bacillus	Firmicutes	Bacillus cytotoxicus	sp|P25705|ATPA_HUMAN ATP synthase subunit alpha, mitochondrial OS=Homo sapiens GN=ATP5A1 PE=1 SV=1	sp|A7GV58|ATPA_BACCN ATP synthase subunit alpha OS=Bacillus cytotoxicus (strain DSM 22905 / CIP 110041 / 391-98 / NVH 391-98) GN=atpA PE=3 SV=1	Cytoplasmic Protein	5	98.1
Bacillus	Firmicutes	Bacillus methylotrophicus	sp|P25705|ATPA_HUMAN ATP synthase subunit alpha, mitochondrial OS=Homo sapiens GN=ATP5A1 PE=1 SV=1	sp|A7Z9Q2|ATPA_BACMF ATP synthase subunit alpha OS=Bacillus methylotrophicus (strain DSM 23117 / BGSC 10A6 / FZB42) GN=atpA PE=3 SV=1	Cytoplasmic Protein	4	90.2
Bacillus	Firmicutes	Bacillus cereus	sp|P25705|ATPA_HUMAN ATP synthase subunit alpha, mitochondrial OS=Homo sapiens GN=ATP5A1 PE=1 SV=1	sp|C1F0N0|ATPA_BACC3 ATP synthase subunit alpha OS=Bacillus cereus (strain 03BB102) GN=atpA PE=3 SV=1	Cytoplasmic Protein	4	90.2
Bacillus	Firmicutes	Bacillus thuringiensis	sp|P25705|ATPA_HUMAN ATP synthase subunit alpha, mitochondrial OS=Homo sapiens GN=ATP5A1 PE=1 SV=1	sp|Q6HAX7|ATPA_BACHK ATP synthase subunit alpha OS=Bacillus thuringiensis subsp. konkukian (strain 97-27) GN=atpA PE=3 SV=1	Cytoplasmic Protein	4	90.2
Bacillus	Firmicutes	Bacillus cereus	sp|P25705|ATPA_HUMAN ATP synthase subunit alpha, mitochondrial OS=Homo sapiens GN=ATP5A1 PE=1 SV=1	sp|B9IRT9|ATPA_BACCQ ATP synthase subunit alpha OS=Bacillus cereus (strain Q1) GN=atpA PE=3 SV=1	Cytoplasmic Protein	4	90.2
Bacillus	Firmicutes	Bacillus cereus	sp|P25705|ATPA_HUMAN ATP synthase subunit alpha, mitochondrial OS=Homo sapiens GN=ATP5A1 PE=1 SV=1	sp|B7HY67|ATPA_BACC7 ATP synthase subunit alpha OS=Bacillus cereus (strain AH187) GN=atpA PE=3 SV=1	Cytoplasmic Protein	4	90.2
Bacillus	Firmicutes	Bacillus cereus	sp|P25705|ATPA_HUMAN ATP synthase subunit alpha, mitochondrial OS=Homo sapiens GN=ATP5A1 PE=1 SV=1	sp|Q72XE6|ATPA_BACC1 ATP synthase subunit alpha OS=Bacillus cereus (strain ATCC 10987 / NRS 248) GN=atpA PE=3 SV=1	Cytoplasmic Protein	4	90.2
Bacillus	Firmicutes	Bacillus cereus	sp|P25705|ATPA_HUMAN ATP synthase subunit alpha, mitochondrial OS=Homo sapiens GN=ATP5A1 PE=1 SV=1	sp|Q630U1|ATPA_BACCZ ATP synthase subunit alpha OS=Bacillus cereus (strain ZK / E33L) GN=atpA PE=3 SV=1	Cytoplasmic Protein	4	90.2
Bacillus	Firmicutes	Bacillus cereus	sp|P25705|ATPA_HUMAN ATP synthase subunit alpha, mitochondrial OS=Homo sapiens GN=ATP5A1 PE=1 SV=1	sp|B7JGN2|ATPA_BACC0 ATP synthase subunit alpha OS=Bacillus cereus (strain AH820) GN=atpA PE=3 SV=1	Cytoplasmic Protein	4	90.2
Bacillus	Firmicutes	Bacillus anthracis	sp|P25705|ATPA_HUMAN ATP synthase subunit alpha, mitochondrial OS=Homo sapiens GN=ATP5A1 PE=1 SV=1	sp|C3LFI1|ATPA_BACAC ATP synthase subunit alpha OS=Bacillus anthracis (strain CDC 684 / NRRL 3495) GN=atpA PE=3 SV=1	Cytoplasmic Protein	4	90.2
Bacillus	Firmicutes	Bacillus anthracis	sp|P25705|ATPA_HUMAN ATP synthase subunit alpha, mitochondrial OS=Homo sapiens GN=ATP5A1 PE=1 SV=1	sp|Q81JZ3|ATPA_BACAN ATP synthase subunit alpha OS=Bacillus anthracis GN=atpA PE=3 SV=1	Cytoplasmic Protein	4	90.2
Bacillus	Firmicutes	Bacillus thuringiensis	sp|P25705|ATPA_HUMAN ATP synthase subunit alpha, mitochondrial OS=Homo sapiens GN=ATP5A1 PE=1 SV=1	sp|A0RL97|ATPA_BACAH ATP synthase subunit alpha OS=Bacillus thuringiensis (strain Al Hakam) GN=atpA PE=3 SV=2	Cytoplasmic Protein	4	90.2
Bacillus	Firmicutes	Bacillus anthracis	sp|P25705|ATPA_HUMAN ATP synthase subunit alpha, mitochondrial OS=Homo sapiens GN=ATP5A1 PE=1 SV=1	sp|C3P1F6|ATPA_BACAA ATP synthase subunit alpha OS=Bacillus anthracis (strain A0248) GN=atpA PE=3 SV=1	Cytoplasmic Protein	4	90.2
Bacillus	Firmicutes	Bacillus cereus	sp|P25705|ATPA_HUMAN ATP synthase subunit alpha, mitochondrial OS=Homo sapiens GN=ATP5A1 PE=1 SV=1	sp|Q814W0|ATPA_BACCR ATP synthase subunit alpha OS=Bacillus cereus (strain ATCC 14579 / DSM 31 / JCM 2152 / NBRC 15305 / NCIMB 9373 / NRRL B-3711) GN=atpA PE=3 SV=1	Cytoplasmic Protein	4	90.2
Bacillus	Firmicutes	Bacillus weihenstephanensis	sp|P25705|ATPA_HUMAN ATP synthase subunit alpha, mitochondrial OS=Homo sapiens GN=ATP5A1 PE=1 SV=1	sp|A9VSA5|ATPA_BACWK ATP synthase subunit alpha OS=Bacillus weihenstephanensis (strain KBAB4) GN=atpA PE=3 SV=1	Cytoplasmic Protein	4	90.2
Bacillus	Firmicutes	Bacillus cereus	sp|P25705|ATPA_HUMAN ATP synthase subunit alpha, mitochondrial OS=Homo sapiens GN=ATP5A1 PE=1 SV=1	sp|B7IQW0|ATPA_BACC2 ATP synthase subunit alpha OS=Bacillus cereus (strain G9842) GN=atpA PE=3 SV=1	Cytoplasmic Protein	1	53.1
Bacillus	Firmicutes	Bacillus cereus	sp|P25705|ATPA_HUMAN ATP synthase subunit alpha, mitochondrial OS=Homo sapiens GN=ATP5A1 PE=1 SV=1	sp|B7HFK4|ATPA_BACC4 ATP synthase subunit alpha OS=Bacillus cereus (strain B4264) GN=atpA PE=3 SV=1	Cytoplasmic Protein	4	90.2
Bacillus	Firmicutes	Bacillus sp.	sp|P25705|ATPA_HUMAN ATP synthase subunit alpha, mitochondrial OS=Homo sapiens GN=ATP5A1 PE=1 SV=1	sp|P09219|ATPA_BACP3 ATP synthase subunit alpha OS=Bacillus sp. (strain PS3) GN=atpA PE=1 SV=1	Cytoplasmic Protein	4	90.2
Bacillus	Firmicutes	Bacillus subtilis	sp|P25705|ATPA_HUMAN ATP synthase subunit alpha, mitochondrial OS=Homo sapiens GN=ATP5A1 PE=1 SV=1	sp|P37808|ATPA_BACSU ATP synthase subunit alpha OS=Bacillus subtilis (strain 168) GN=atpA PE=1 SV=3	Cytoplasmic Protein	4	90.2
Bacillus	Firmicutes	Lactobacillus plantarum	sp|P25705|ATPA_HUMAN ATP synthase subunit alpha, mitochondrial OS=Homo sapiens GN=ATP5A1 PE=1 SV=1	sp|Q88UU1|ATPA_LACPL ATP synthase subunit alpha OS=Lactobacillus plantarum (strain ATCC BAA-793 / NCIMB 8826 / WCFS1) GN=atpA PE=3 SV=1	Cytoplasmic Protein	4	90.2
Bacillus	Firmicutes	Lactobacillus reuteri	sp|P25705|ATPA_HUMAN ATP synthase subunit alpha, mitochondrial OS=Homo sapiens GN=ATP5A1 PE=1 SV=1	sp|B2G689|ATPA_LACRJ ATP synthase subunit alpha OS=Lactobacillus reuteri (strain JCM 1112) GN=atpA PE=3 SV=1	Cytoplasmic Protein	4	90.2
Bacillus	Firmicutes	Lactobacillus reuteri	sp|P25705|ATPA_HUMAN ATP synthase subunit alpha, mitochondrial OS=Homo sapiens GN=ATP5A1 PE=1 SV=1	sp|A5VIQ9|ATPA_LACRD ATP synthase subunit alpha OS=Lactobacillus reuteri (strain DSM 20016) GN=atpA PE=3 SV=1	Cytoplasmic Protein	4	90.2
Bacillus	Firmicutes	Lactobacillus sakei	sp|P25705|ATPA_HUMAN ATP synthase subunit alpha, mitochondrial OS=Homo sapiens GN=ATP5A1 PE=1 SV=1	sp|Q38WK3|ATPA_LACSS ATP synthase subunit alpha OS=Lactobacillus sakei subsp. sakei (strain 23K) GN=atpA PE=3 SV=1	Cytoplasmic Protein	1	53.1
Bacillus	Firmicutes	Lactobacillus casei	sp|P25705|ATPA_HUMAN ATP synthase subunit alpha, mitochondrial OS=Homo sapiens GN=ATP5A1 PE=1 SV=1	sp|Q03A20|ATPA_LACC3 ATP synthase subunit alpha OS=Lactobacillus casei (strain ATCC 334) GN=atpA PE=3 SV=1	Cytoplasmic Protein	4	90.2
Bacillus	Firmicutes	Lactobacillus casei	sp|P25705|ATPA_HUMAN ATP synthase subunit alpha, mitochondrial OS=Homo sapiens GN=ATP5A1 PE=1 SV=1	sp|B3WDL6|ATPA_LACCB ATP synthase subunit alpha OS=Lactobacillus casei (strain BL23) GN=atpA PE=3 SV=1	Cytoplasmic Protein	1	53.1
Bacillus	Firmicutes	Lactobacillus fermentum	sp|P25705|ATPA_HUMAN ATP synthase subunit alpha, mitochondrial OS=Homo sapiens GN=ATP5A1 PE=1 SV=1	sp|B2GAU3|ATPA_LACF3 ATP synthase subunit alpha OS=Lactobacillus fermentum (strain NBRC 3956 / LMG 18251) GN=atpA PE=3 SV=1	Cytoplasmic Protein	4	90.2
Bacillus	Firmicutes	Lactobacillus salivarius	sp|P25705|ATPA_HUMAN ATP synthase subunit alpha, mitochondrial OS=Homo sapiens GN=ATP5A1 PE=1 SV=1	sp|Q1WUC8|ATPA_LACS1 ATP synthase subunit alpha OS=Lactobacillus salivarius (strain UCC118) GN=atpA PE=3 SV=1	Cytoplasmic Protein	4	90.2
Bacillus	Firmicutes	Lactobacillus gasseri	sp|P25705|ATPA_HUMAN ATP synthase subunit alpha, mitochondrial OS=Homo sapiens GN=ATP5A1 PE=1 SV=1	sp|Q042L3|ATPA_LACGA ATP synthase subunit alpha OS=Lactobacillus gasseri (strain ATCC 33323 / DSM 20243 / JCM 1131 / NCIMB 11718 / AM63) GN=atpA PE=3 SV=1	Cytoplasmic Protein	2	68.1
Bacillus	Firmicutes	Lactobacillus johnsonii	sp|P25705|ATPA_HUMAN ATP synthase subunit alpha, mitochondrial OS=Homo sapiens GN=ATP5A1 PE=1 SV=1	sp|Q74K17|ATPA_LACJO ATP synthase subunit alpha OS=Lactobacillus johnsonii (strain CNCM I-12250 / La1 / NCC 533) GN=atpA PE=3 SV=1	Cytoplasmic Protein	1	53.1
Bacillus	Firmicutes	Lactobacillus helveticus	sp|P25705|ATPA_HUMAN ATP synthase subunit alpha, mitochondrial OS=Homo sapiens GN=ATP5A1 PE=1 SV=1	sp|A8YUJ9|ATPA_LACH4 ATP synthase subunit alpha OS=Lactobacillus helveticus (strain DPC 4571) GN=atpA PE=3 SV=1	Cytoplasmic Protein	2	68.1
Bacillus	Firmicutes	Lactobacillus acidophilus	sp|P25705|ATPA_HUMAN ATP synthase subunit alpha, mitochondrial OS=Homo sapiens GN=ATP5A1 PE=1 SV=1	sp|Q5FKY2|ATPA_LACAC ATP synthase subunit alpha OS=Lactobacillus acidophilus (strain ATCC 700396 / NCK56 / N2 / NCFM) GN=atpA PE=2 SV=1	Cytoplasmic Protein	1	53.1
Bacillus	Firmicutes	Lactobacillus brevis	sp|P25705|ATPA_HUMAN ATP synthase subunit alpha, mitochondrial OS=Homo sapiens GN=ATP5A1 PE=1 SV=1	sp|Q03QY6|ATPA_LACBA ATP synthase subunit alpha OS=Lactobacillus brevis (strain ATCC 367 / JCM 1170) GN=atpA PE=3 SV=1	Cytoplasmic Protein	1	53.1
Bacillus	Firmicutes	Lactobacillus delbrueckii	sp|P25705|ATPA_HUMAN ATP synthase subunit alpha, mitochondrial OS=Homo sapiens GN=ATP5A1 PE=1 SV=1	sp|Q04BA5|ATPA_LACDB ATP synthase subunit alpha OS=Lactobacillus delbrueckii subsp. bulgaricus (strain ATCC BAA-365) GN=atpA PE=3 SV=1	Cytoplasmic Protein	4	90.2
Bacillus	Firmicutes	Lactobacillus delbrueckii	sp|P25705|ATPA_HUMAN ATP synthase subunit alpha, mitochondrial OS=Homo sapiens GN=ATP5A1 PE=1 SV=1	sp|Q1GAW7|ATPA_LACDA ATP synthase subunit alpha OS=Lactobacillus delbrueckii subsp. bulgaricus (strain ATCC 11842 / DSM 20081 / JCM 1002 / NBRC 13953 / NCIMB 11778) GN=atpA PE=3 SV=1	Cytoplasmic Protein	4	90.2
Bacillus	Firmicutes	Bacillus caldotenax	sp|P06576|ATPB_HUMAN ATP synthase subunit beta, mitochondrial OS=Homo sapiens GN=ATP5B PE=1 SV=3	sp|P41009|ATPB_BACCA ATP synthase subunit beta OS=Bacillus caldotenax GN=atpD PE=3 SV=1	Cytoplasmic Protein	1	53.1
Bacillus	Firmicutes	Bacillus halodurans	sp|P06576|ATPB_HUMAN ATP synthase subunit beta, mitochondrial OS=Homo sapiens GN=ATP5B PE=1 SV=3	sp|Q9K6H5|ATPB_BACHD ATP synthase subunit beta OS=Bacillus halodurans (strain ATCC BAA-125 / DSM 18197 / FERM 7344 / JCM 9153 / C-125) GN=atpD PE=3 SV=1	Cytoplasmic Protein	1	53.1
Bacillus	Firmicutes	Bacillus cytotoxicus	sp|P06576|ATPB_HUMAN ATP synthase subunit beta, mitochondrial OS=Homo sapiens GN=ATP5B PE=1 SV=3	sp|A7GV56|ATPB_BACCN ATP synthase subunit beta OS=Bacillus cytotoxicus (strain DSM 22905 / CIP 110041 / 391-98 / NVH 391-98) GN=atpD PE=3 SV=1	Cytoplasmic Protein	4	90.2
Bacillus	Firmicutes	Bacillus sp.	sp|P06576|ATPB_HUMAN ATP synthase subunit beta, mitochondrial OS=Homo sapiens GN=ATP5B PE=1 SV=3	sp|P07677|ATPB_BACP3 ATP synthase subunit beta OS=Bacillus sp. (strain PS3) GN=atpD PE=1 SV=1	Cytoplasmic Protein	4	90.2
Bacillus	Firmicutes	Bacillus megaterium	sp|P06576|ATPB_HUMAN ATP synthase subunit beta, mitochondrial OS=Homo sapiens GN=ATP5B PE=1 SV=3	sp|P12698|ATPB_BACMQ ATP synthase subunit beta OS=Bacillus megaterium (strain ATCC 12872 / QMB1551) GN=atpD PE=3 SV=2	Cytoplasmic Protein	4	90.2
Bacillus	Firmicutes	Bacillus pseudofirmus	sp|P06576|ATPB_HUMAN ATP synthase subunit beta, mitochondrial OS=Homo sapiens GN=ATP5B PE=1 SV=3	sp|P22478|ATPB_BACPE ATP synthase subunit beta OS=Bacillus pseudofirmus (strain OF4) GN=atpD PE=3 SV=2	Cytoplasmic Protein	4	90.2
Bacillus	Firmicutes	Bacillus cereus	sp|P06576|ATPB_HUMAN ATP synthase subunit beta, mitochondrial OS=Homo sapiens GN=ATP5B PE=1 SV=3	sp|B9IRT7|ATPB_BACCQ ATP synthase subunit beta OS=Bacillus cereus (strain Q1) GN=atpD PE=3 SV=1	Cytoplasmic Protein	4	90.2
Bacillus	Firmicutes	Bacillus cereus	sp|P06576|ATPB_HUMAN ATP synthase subunit beta, mitochondrial OS=Homo sapiens GN=ATP5B PE=1 SV=3	sp|B7HY64|ATPB_BACC7 ATP synthase subunit beta OS=Bacillus cereus (strain AH187) GN=atpD PE=3 SV=1	Cytoplasmic Protein	4	90.2
Bacillus	Firmicutes	Bacillus cereus	sp|P06576|ATPB_HUMAN ATP synthase subunit beta, mitochondrial OS=Homo sapiens GN=ATP5B PE=1 SV=3	sp|Q72XE8|ATPB_BACC1 ATP synthase subunit beta OS=Bacillus cereus (strain ATCC 10987 / NRS 248) GN=atpD PE=3 SV=1	Cytoplasmic Protein	1	53.1
Bacillus	Firmicutes	Bacillus thuringiensis	sp|P06576|ATPB_HUMAN ATP synthase subunit beta, mitochondrial OS=Homo sapiens GN=ATP5B PE=1 SV=3	sp|A0RL95|ATPB_BACAH ATP synthase subunit beta OS=Bacillus thuringiensis (strain Al Hakam) GN=atpD PE=3 SV=1	Cytoplasmic Protein	4	90.2
Bacillus	Firmicutes	Bacillus thuringiensis	sp|P06576|ATPB_HUMAN ATP synthase subunit beta, mitochondrial OS=Homo sapiens GN=ATP5B PE=1 SV=3	sp|Q6HAY0|ATPB_BACHK ATP synthase subunit beta OS=Bacillus thuringiensis subsp. konkukian (strain 97-27) GN=atpD PE=3 SV=1	Cytoplasmic Protein	1	53.1
Bacillus	Firmicutes	Bacillus anthracis	sp|P06576|ATPB_HUMAN ATP synthase subunit beta, mitochondrial OS=Homo sapiens GN=ATP5B PE=1 SV=3	sp|Q81JZ5|ATPB_BACAN ATP synthase subunit beta OS=Bacillus anthracis GN=atpD PE=3 SV=1	Cytoplasmic Protein	4	90.2
Bacillus	Firmicutes	Bacillus cereus	sp|P06576|ATPB_HUMAN ATP synthase subunit beta, mitochondrial OS=Homo sapiens GN=ATP5B PE=1 SV=3	sp|Q630U3|ATPB_BACCZ ATP synthase subunit beta OS=Bacillus cereus (strain ZK / E33L) GN=atpD PE=3 SV=1	Cytoplasmic Protein	4	90.2
Bacillus	Firmicutes	Bacillus cereus	sp|P06576|ATPB_HUMAN ATP synthase subunit beta, mitochondrial OS=Homo sapiens GN=ATP5B PE=1 SV=3	sp|C1F0M8|ATPB_BACC3 ATP synthase subunit beta OS=Bacillus cereus (strain 03BB102) GN=atpD PE=3 SV=1	Cytoplasmic Protein	4	90.2
Bacillus	Firmicutes	Bacillus anthracis	sp|P06576|ATPB_HUMAN ATP synthase subunit beta, mitochondrial OS=Homo sapiens GN=ATP5B PE=1 SV=3	sp|C3LFH9|ATPB_BACAC ATP synthase subunit beta OS=Bacillus anthracis (strain CDC 684 / NRRL 3495) GN=atpD PE=3 SV=1	Cytoplasmic Protein	4	90.2
Bacillus	Firmicutes	Bacillus anthracis	sp|P06576|ATPB_HUMAN ATP synthase subunit beta, mitochondrial OS=Homo sapiens GN=ATP5B PE=1 SV=3	sp|C3P1F4|ATPB_BACAA ATP synthase subunit beta OS=Bacillus anthracis (strain A0248) GN=atpD PE=3 SV=1	Cytoplasmic Protein	4	90.2
Bacillus	Firmicutes	Bacillus licheniformis	sp|P06576|ATPB_HUMAN ATP synthase subunit beta, mitochondrial OS=Homo sapiens GN=ATP5B PE=1 SV=3	sp|Q65DX4|ATPB_BACLD ATP synthase subunit beta OS=Bacillus licheniformis (strain ATCC 14580 / DSM 13 / JCM 2505 / NBRC 12200 / NCIMB 9375 / NRRL NRS-1264 / Gibson 46) GN=atpD PE=3 SV=1	Cytoplasmic Protein	4	90.2
Bacillus	Firmicutes	Bacillus cereus	sp|P06576|ATPB_HUMAN ATP synthase subunit beta, mitochondrial OS=Homo sapiens GN=ATP5B PE=1 SV=3	sp|B7JGN0|ATPB_BACC0 ATP synthase subunit beta OS=Bacillus cereus (strain AH820) GN=atpD PE=3 SV=1	Cytoplasmic Protein	4	90.2
Bacillus	Firmicutes	Bacillus weihenstephanensis	sp|P06576|ATPB_HUMAN ATP synthase subunit beta, mitochondrial OS=Homo sapiens GN=ATP5B PE=1 SV=3	sp|A9VSA3|ATPB_BACWK ATP synthase subunit beta OS=Bacillus weihenstephanensis (strain KBAB4) GN=atpD PE=3 SV=1	Cytoplasmic Protein	4	90.2
Bacillus	Firmicutes	Bacillus clausii	sp|P06576|ATPB_HUMAN ATP synthase subunit beta, mitochondrial OS=Homo sapiens GN=ATP5B PE=1 SV=3	sp|Q5WB78|ATPB_BACSK ATP synthase subunit beta OS=Bacillus clausii (strain KSM-K16) GN=atpD PE=3 SV=1	Cytoplasmic Protein	1	53.1
Bacillus	Firmicutes	Bacillus cereus	sp|P06576|ATPB_HUMAN ATP synthase subunit beta, mitochondrial OS=Homo sapiens GN=ATP5B PE=1 SV=3	sp|Q814W2|ATPB_BACCR ATP synthase subunit beta OS=Bacillus cereus (strain ATCC 14579 / DSM 31 / JCM 2152 / NBRC 15305 / NCIMB 9373 / NRRL B-3711) GN=atpD PE=3 SV=1	Cytoplasmic Protein	4	90.2
Bacillus	Firmicutes	Bacillus cereus	sp|P06576|ATPB_HUMAN ATP synthase subunit beta, mitochondrial OS=Homo sapiens GN=ATP5B PE=1 SV=3	sp|B7HFK1|ATPB_BACC4 ATP synthase subunit beta OS=Bacillus cereus (strain B4264) GN=atpD PE=3 SV=1	Cytoplasmic Protein	1	53.1
Bacillus	Firmicutes	Bacillus cereus	sp|P06576|ATPB_HUMAN ATP synthase subunit beta, mitochondrial OS=Homo sapiens GN=ATP5B PE=1 SV=3	sp|B7IQV8|ATPB_BACC2 ATP synthase subunit beta OS=Bacillus cereus (strain G9842) GN=atpD PE=3 SV=1	Cytoplasmic Protein	4	90.2
Bacillus	Firmicutes	Bacillus pumilus	sp|P06576|ATPB_HUMAN ATP synthase subunit beta, mitochondrial OS=Homo sapiens GN=ATP5B PE=1 SV=3	sp|A8FIB2|ATPB_BACP2 ATP synthase subunit beta OS=Bacillus pumilus (strain SAFR-032) GN=atpD PE=3 SV=1	Cytoplasmic Protein	4	90.2
Bacillus	Firmicutes	Bacillus subtilis	sp|P06576|ATPB_HUMAN ATP synthase subunit beta, mitochondrial OS=Homo sapiens GN=ATP5B PE=1 SV=3	sp|P37809|ATPB_BACSU ATP synthase subunit beta OS=Bacillus subtilis (strain 168) GN=atpD PE=1 SV=1	Cytoplasmic Protein	1	53.1
Bacillus	Firmicutes	Bacillus subtilis	sp|Q04656|ATP7A_HUMAN Copper-transporting ATPase 1 OS=Homo sapiens GN=ATP7A PE=1 SV=3	sp|O32220|COPA_BACSU Copper-exporting P-type ATPase A OS=Bacillus subtilis (strain 168) GN=copA PE=1 SV=2	Cytoplasmic Protein	4	90.2
Bacillus	Firmicutes	Bacillus subtilis	sp|Q13825|AUHM_HUMAN Methylglutaconyl-CoA hydratase, mitochondrial OS=Homo sapiens GN=AUH PE=1 SV=1	sp|O34893|YNGF_BACSU Putative enoyl-CoA hydratase/isomerase YngF OS=Bacillus subtilis (strain 168) GN=yngF PE=3 SV=1	Cytoplasmic Protein	1	53.1
Bacillus	Firmicutes	Lactobacillus delbrueckii	sp|Q13867|BLMH_HUMAN Bleomycin hydrolase OS=Homo sapiens GN=BLMH PE=1 SV=1	sp|P94869|PEPG_LACDL Aminopeptidase G OS=Lactobacillus delbrueckii subsp. lactis GN=pepG PE=3 SV=1	Cytoplasmic Protein	4	90.2
Bacillus	Firmicutes	Lactobacillus helveticus	sp|Q13867|BLMH_HUMAN Bleomycin hydrolase OS=Homo sapiens GN=BLMH PE=1 SV=1	sp|P94870|PEPE_LACHE Aminopeptidase E OS=Lactobacillus helveticus GN=pepE PE=1 SV=1	Cytoplasmic Protein	4	90.2
Bacillus	Firmicutes	Lactobacillus delbrueckii	sp|Q13867|BLMH_HUMAN Bleomycin hydrolase OS=Homo sapiens GN=BLMH PE=1 SV=1	sp|P94868|PEPW_LACDL Aminopeptidase W OS=Lactobacillus delbrueckii subsp. lactis GN=pepW PE=3 SV=1	Cytoplasmic Protein	4	90.2
Bacillus	Firmicutes	Bacillus subtilis	sp|P54132|BLM_HUMAN Bloom syndrome protein OS=Homo sapiens GN=BLM PE=1 SV=1	sp|P50729|RECS_BACSU Probable ATP-dependent DNA helicase RecS OS=Bacillus subtilis (strain 168) GN=recS PE=3 SV=1	Cytoplasmic Protein	4	90.2
Bacillus	Firmicutes	Bacillus licheniformis	sp|P11586|C1TC_HUMAN C-1-tetrahydrofolate synthase, cytoplasmic OS=Homo sapiens GN=MTHFD1 PE=1 SV=3	sp|Q65IA6|FTHS_BACLD Formate--tetrahydrofolate ligase OS=Bacillus licheniformis (strain ATCC 14580 / DSM 13 / JCM 2505 / NBRC 12200 / NCIMB 9375 / NRRL NRS-1264 / Gibson 46) GN=fhs PE=3 SV=1	Cytoplasmic Protein	4	90.2
Bacillus	Firmicutes	Bacillus pumilus	sp|P11586|C1TC_HUMAN C-1-tetrahydrofolate synthase, cytoplasmic OS=Homo sapiens GN=MTHFD1 PE=1 SV=3	sp|A8FEC9|FTHS_BACP2 Formate--tetrahydrofolate ligase OS=Bacillus pumilus (strain SAFR-032) GN=fhs PE=3 SV=1	Cytoplasmic Protein	4	90.2
Bacillus	Firmicutes	Bacillus cereus	sp|P11586|C1TC_HUMAN C-1-tetrahydrofolate synthase, cytoplasmic OS=Homo sapiens GN=MTHFD1 PE=1 SV=3	sp|B7HP29|FTHS_BACC7 Formate--tetrahydrofolate ligase OS=Bacillus cereus (strain AH187) GN=fhs PE=3 SV=1	Cytoplasmic Protein	1	53.1
Bacillus	Firmicutes	Bacillus cereus	sp|P11586|C1TC_HUMAN C-1-tetrahydrofolate synthase, cytoplasmic OS=Homo sapiens GN=MTHFD1 PE=1 SV=3	sp|B9IYP4|FTHS_BACCQ Formate--tetrahydrofolate ligase OS=Bacillus cereus (strain Q1) GN=fhs PE=3 SV=1	Cytoplasmic Protein	4	90.2
Bacillus	Firmicutes	Bacillus cereus	sp|P11586|C1TC_HUMAN C-1-tetrahydrofolate synthase, cytoplasmic OS=Homo sapiens GN=MTHFD1 PE=1 SV=3	sp|B7JLG8|FTHS_BACC0 Formate--tetrahydrofolate ligase OS=Bacillus cereus (strain AH820) GN=fhs PE=3 SV=1	Cytoplasmic Protein	4	90.2
Bacillus	Firmicutes	Bacillus anthracis	sp|P11586|C1TC_HUMAN C-1-tetrahydrofolate synthase, cytoplasmic OS=Homo sapiens GN=MTHFD1 PE=1 SV=3	sp|Q81RE1|FTHS_BACAN Formate--tetrahydrofolate ligase OS=Bacillus anthracis GN=fhs PE=3 SV=1	Cytoplasmic Protein	4	90.2
Bacillus	Firmicutes	Bacillus anthracis	sp|P11586|C1TC_HUMAN C-1-tetrahydrofolate synthase, cytoplasmic OS=Homo sapiens GN=MTHFD1 PE=1 SV=3	sp|C3P858|FTHS_BACAA Formate--tetrahydrofolate ligase OS=Bacillus anthracis (strain A0248) GN=fhs PE=3 SV=1	Cytoplasmic Protein	4	90.2
Bacillus	Firmicutes	Bacillus anthracis	sp|P11586|C1TC_HUMAN C-1-tetrahydrofolate synthase, cytoplasmic OS=Homo sapiens GN=MTHFD1 PE=1 SV=3	sp|C3LKJ6|FTHS_BACAC Formate--tetrahydrofolate ligase OS=Bacillus anthracis (strain CDC 684 / NRRL 3495) GN=fhs PE=3 SV=1	Cytoplasmic Protein	4	90.2
Bacillus	Firmicutes	Bacillus thuringiensis	sp|P11586|C1TC_HUMAN C-1-tetrahydrofolate synthase, cytoplasmic OS=Homo sapiens GN=MTHFD1 PE=1 SV=3	sp|Q6HJK9|FTHS_BACHK Formate--tetrahydrofolate ligase OS=Bacillus thuringiensis subsp. konkukian (strain 97-27) GN=fhs PE=3 SV=1	Cytoplasmic Protein	1	53.1
Bacillus	Firmicutes	Bacillus cereus	sp|P11586|C1TC_HUMAN C-1-tetrahydrofolate synthase, cytoplasmic OS=Homo sapiens GN=MTHFD1 PE=1 SV=3	sp|Q63C61|FTHS_BACCZ Formate--tetrahydrofolate ligase OS=Bacillus cereus (strain ZK / E33L) GN=fhs PE=3 SV=1	Cytoplasmic Protein	4	90.2
Bacillus	Firmicutes	Bacillus cereus	sp|P11586|C1TC_HUMAN C-1-tetrahydrofolate synthase, cytoplasmic OS=Homo sapiens GN=MTHFD1 PE=1 SV=3	sp|C1ES77|FTHS_BACC3 Formate--tetrahydrofolate ligase OS=Bacillus cereus (strain 03BB102) GN=fhs PE=3 SV=1	Cytoplasmic Protein	4	90.2
Bacillus	Firmicutes	Bacillus thuringiensis	sp|P11586|C1TC_HUMAN C-1-tetrahydrofolate synthase, cytoplasmic OS=Homo sapiens GN=MTHFD1 PE=1 SV=3	sp|A0RD97|FTHS_BACAH Formate--tetrahydrofolate ligase OS=Bacillus thuringiensis (strain Al Hakam) GN=fhs PE=3 SV=2	Cytoplasmic Protein	4	90.2
Bacillus	Firmicutes	Bacillus cereus	sp|P11586|C1TC_HUMAN C-1-tetrahydrofolate synthase, cytoplasmic OS=Homo sapiens GN=MTHFD1 PE=1 SV=3	sp|Q739F4|FTHS_BACC1 Formate--tetrahydrofolate ligase OS=Bacillus cereus (strain ATCC 10987 / NRS 248) GN=fhs PE=3 SV=1	Cytoplasmic Protein	4	90.2
Bacillus	Firmicutes	Bacillus cereus	sp|P11586|C1TC_HUMAN C-1-tetrahydrofolate synthase, cytoplasmic OS=Homo sapiens GN=MTHFD1 PE=1 SV=3	sp|B7IUA4|FTHS_BACC2 Formate--tetrahydrofolate ligase OS=Bacillus cereus (strain G9842) GN=fhs PE=3 SV=1	Cytoplasmic Protein	4	90.2
Bacillus	Firmicutes	Bacillus cereus	sp|P11586|C1TC_HUMAN C-1-tetrahydrofolate synthase, cytoplasmic OS=Homo sapiens GN=MTHFD1 PE=1 SV=3	sp|Q81E87|FTHS_BACCR Formate--tetrahydrofolate ligase OS=Bacillus cereus (strain ATCC 14579 / DSM 31 / JCM 2152 / NBRC 15305 / NCIMB 9373 / NRRL B-3711) GN=fhs PE=3 SV=1	Cytoplasmic Protein	4	90.2
Bacillus	Firmicutes	Lactobacillus casei	sp|P11586|C1TC_HUMAN C-1-tetrahydrofolate synthase, cytoplasmic OS=Homo sapiens GN=MTHFD1 PE=1 SV=3	sp|B3WEG3|FTHS_LACCB Formate--tetrahydrofolate ligase OS=Lactobacillus casei (strain BL23) GN=fhs PE=3 SV=1	Cytoplasmic Protein	4	90.2
Bacillus	Firmicutes	Lactobacillus casei	sp|P11586|C1TC_HUMAN C-1-tetrahydrofolate synthase, cytoplasmic OS=Homo sapiens GN=MTHFD1 PE=1 SV=3	sp|Q038Y4|FTHS_LACC3 Formate--tetrahydrofolate ligase OS=Lactobacillus casei (strain ATCC 334) GN=fhs PE=3 SV=1	Cytoplasmic Protein	1	53.1
Bacillus	Firmicutes	Lactobacillus acidophilus	sp|P11586|C1TC_HUMAN C-1-tetrahydrofolate synthase, cytoplasmic OS=Homo sapiens GN=MTHFD1 PE=1 SV=3	sp|Q5FIU5|FTHS2_LACAC Formate--tetrahydrofolate ligase 2 OS=Lactobacillus acidophilus (strain ATCC 700396 / NCK56 / N2 / NCFM) GN=fhs2 PE=3 SV=1	Cytoplasmic Protein	4	90.2
Bacillus	Firmicutes	Lactobacillus sakei	sp|P11586|C1TC_HUMAN C-1-tetrahydrofolate synthase, cytoplasmic OS=Homo sapiens GN=MTHFD1 PE=1 SV=3	sp|Q38X32|FTHS_LACSS Formate--tetrahydrofolate ligase OS=Lactobacillus sakei subsp. sakei (strain 23K) GN=fhs PE=3 SV=1	Cytoplasmic Protein	1	53.1
Bacillus	Firmicutes	Lactobacillus salivarius	sp|P11586|C1TC_HUMAN C-1-tetrahydrofolate synthase, cytoplasmic OS=Homo sapiens GN=MTHFD1 PE=1 SV=3	sp|Q1WTW0|FTHS_LACS1 Formate--tetrahydrofolate ligase OS=Lactobacillus salivarius (strain UCC118) GN=fhs PE=3 SV=1	Cytoplasmic Protein	1	53.1
Bacillus	Firmicutes	Lactobacillus reuteri	sp|P11586|C1TC_HUMAN C-1-tetrahydrofolate synthase, cytoplasmic OS=Homo sapiens GN=MTHFD1 PE=1 SV=3	sp|A5VHS9|FTHS_LACRD Formate--tetrahydrofolate ligase OS=Lactobacillus reuteri (strain DSM 20016) GN=fhs PE=3 SV=1	Cytoplasmic Protein	4	90.2
Bacillus	Firmicutes	Lactobacillus reuteri	sp|P11586|C1TC_HUMAN C-1-tetrahydrofolate synthase, cytoplasmic OS=Homo sapiens GN=MTHFD1 PE=1 SV=3	sp|B2G5A9|FTHS_LACRJ Formate--tetrahydrofolate ligase OS=Lactobacillus reuteri (strain JCM 1112) GN=fhs PE=3 SV=1	Cytoplasmic Protein	1	53.1
Bacillus	Firmicutes	Lactobacillus plantarum	sp|P11586|C1TC_HUMAN C-1-tetrahydrofolate synthase, cytoplasmic OS=Homo sapiens GN=MTHFD1 PE=1 SV=3	sp|Q88W76|FTHS_LACPL Formate--tetrahydrofolate ligase OS=Lactobacillus plantarum (strain ATCC BAA-793 / NCIMB 8826 / WCFS1) GN=fhs PE=3 SV=1	Cytoplasmic Protein	1	53.1
Bacillus	Firmicutes	Lactobacillus fermentum	sp|P11586|C1TC_HUMAN C-1-tetrahydrofolate synthase, cytoplasmic OS=Homo sapiens GN=MTHFD1 PE=1 SV=3	sp|B2GF64|FTHS_LACF3 Formate--tetrahydrofolate ligase OS=Lactobacillus fermentum (strain NBRC 3956 / LMG 18251) GN=fhs PE=3 SV=1	Cytoplasmic Protein	4	90.2
Bacillus	Firmicutes	Lactobacillus brevis	sp|P11586|C1TC_HUMAN C-1-tetrahydrofolate synthase, cytoplasmic OS=Homo sapiens GN=MTHFD1 PE=1 SV=3	sp|Q03S45|FTHS_LACBA Formate--tetrahydrofolate ligase OS=Lactobacillus brevis (strain ATCC 367 / JCM 1170) GN=fhs PE=3 SV=1	Cytoplasmic Protein	1	53.1
Bacillus	Firmicutes	Lactobacillus gasseri	sp|P11586|C1TC_HUMAN C-1-tetrahydrofolate synthase, cytoplasmic OS=Homo sapiens GN=MTHFD1 PE=1 SV=3	sp|Q043I0|FTHS_LACGA Formate--tetrahydrofolate ligase OS=Lactobacillus gasseri (strain ATCC 33323 / DSM 20243 / JCM 1131 / NCIMB 11718 / AM63) GN=fhs PE=3 SV=1	Cytoplasmic Protein	4	90.2
Bacillus	Firmicutes	Lactobacillus delbrueckii	sp|P11586|C1TC_HUMAN C-1-tetrahydrofolate synthase, cytoplasmic OS=Homo sapiens GN=MTHFD1 PE=1 SV=3	sp|Q1GA94|FTHS_LACDA Formate--tetrahydrofolate ligase OS=Lactobacillus delbrueckii subsp. bulgaricus (strain ATCC 11842 / DSM 20081 / JCM 1002 / NBRC 13953 / NCIMB 11778) GN=fhs PE=3 SV=2	Cytoplasmic Protein	4	90.2
Bacillus	Firmicutes	Lactobacillus delbrueckii	sp|P11586|C1TC_HUMAN C-1-tetrahydrofolate synthase, cytoplasmic OS=Homo sapiens GN=MTHFD1 PE=1 SV=3	sp|Q04AM0|FTHS_LACDB Formate--tetrahydrofolate ligase OS=Lactobacillus delbrueckii subsp. bulgaricus (strain ATCC BAA-365) GN=fhs PE=3 SV=1	Cytoplasmic Protein	4	90.2
Bacillus	Firmicutes	Lactobacillus johnsonii	sp|P11586|C1TC_HUMAN C-1-tetrahydrofolate synthase, cytoplasmic OS=Homo sapiens GN=MTHFD1 PE=1 SV=3	sp|Q74JC1|FTHS_LACJO Formate--tetrahydrofolate ligase OS=Lactobacillus johnsonii (strain CNCM I-12250 / La1 / NCC 533) GN=fhs PE=3 SV=1	Cytoplasmic Protein	4	90.2
Bacillus	Firmicutes	Lactobacillus acidophilus	sp|P11586|C1TC_HUMAN C-1-tetrahydrofolate synthase, cytoplasmic OS=Homo sapiens GN=MTHFD1 PE=1 SV=3	sp|Q5FJY2|FTHS1_LACAC Formate--tetrahydrofolate ligase 1 OS=Lactobacillus acidophilus (strain ATCC 700396 / NCK56 / N2 / NCFM) GN=fhs1 PE=3 SV=1	Cytoplasmic Protein	1	53.1
Bacillus	Firmicutes	Bacillus methylotrophicus	sp|P11586|C1TC_HUMAN C-1-tetrahydrofolate synthase, cytoplasmic OS=Homo sapiens GN=MTHFD1 PE=1 SV=3	sp|A7Z6J9|FOLD_BACMF Bifunctional protein FolD OS=Bacillus methylotrophicus (strain DSM 23117 / BGSC 10A6 / FZB42) GN=folD PE=3 SV=1	Cytoplasmic Protein	1	53.1
Bacillus	Firmicutes	Bacillus halodurans	sp|P11586|C1TC_HUMAN C-1-tetrahydrofolate synthase, cytoplasmic OS=Homo sapiens GN=MTHFD1 PE=1 SV=3	sp|Q9K966|FOLD_BACHD Bifunctional protein FolD OS=Bacillus halodurans (strain ATCC BAA-125 / DSM 18197 / FERM 7344 / JCM 9153 / C-125) GN=folD PE=3 SV=1	Cytoplasmic Protein	4	90.2
Bacillus	Firmicutes	Bacillus pumilus	sp|P11586|C1TC_HUMAN C-1-tetrahydrofolate synthase, cytoplasmic OS=Homo sapiens GN=MTHFD1 PE=1 SV=3	sp|A8FF15|FOLD_BACP2 Bifunctional protein FolD OS=Bacillus pumilus (strain SAFR-032) GN=folD PE=3 SV=1	Cytoplasmic Protein	4	90.2
Bacillus	Firmicutes	Bacillus licheniformis	sp|P11586|C1TC_HUMAN C-1-tetrahydrofolate synthase, cytoplasmic OS=Homo sapiens GN=MTHFD1 PE=1 SV=3	sp|Q65HI8|FOLD_BACLD Bifunctional protein FolD OS=Bacillus licheniformis (strain ATCC 14580 / DSM 13 / JCM 2505 / NBRC 12200 / NCIMB 9375 / NRRL NRS-1264 / Gibson 46) GN=folD PE=3 SV=1	Cytoplasmic Protein	4	90.2
Bacillus	Firmicutes	Bacillus subtilis	sp|P11586|C1TC_HUMAN C-1-tetrahydrofolate synthase, cytoplasmic OS=Homo sapiens GN=MTHFD1 PE=1 SV=3	sp|P54382|FOLD_BACSU Bifunctional protein FolD OS=Bacillus subtilis (strain 168) GN=folD PE=3 SV=1	Cytoplasmic Protein	1	53.1
Bacillus	Firmicutes	Lactobacillus salivarius	sp|P11586|C1TC_HUMAN C-1-tetrahydrofolate synthase, cytoplasmic OS=Homo sapiens GN=MTHFD1 PE=1 SV=3	sp|Q1WUJ3|FOLD_LACS1 Bifunctional protein FolD OS=Lactobacillus salivarius (strain UCC118) GN=folD PE=3 SV=1	Cytoplasmic Protein	1	53.1
Bacillus	Firmicutes	Bacillus subtilis	sp|P35520|CBS_HUMAN Cystathionine beta-synthase OS=Homo sapiens GN=CBS PE=1 SV=2	sp|O05393|MCCA_BACSU O-acetylserine dependent cystathionine beta-synthase OS=Bacillus subtilis (strain 168) GN=mccA PE=1 SV=1	Cytoplasmic Protein	1	53.1
Bacillus	Firmicutes	Bacillus subtilis	sp|P35520|CBS_HUMAN Cystathionine beta-synthase OS=Homo sapiens GN=CBS PE=1 SV=2	sp|O34476|CYSM_BACSU Probable cysteine synthase OS=Bacillus subtilis (strain 168) GN=ytkP PE=3 SV=1	Cytoplasmic Protein	4	90.2
Bacillus	Firmicutes	Bacillus subtilis	sp|P35520|CBS_HUMAN Cystathionine beta-synthase OS=Homo sapiens GN=CBS PE=1 SV=2	sp|P37887|CYSK_BACSU Cysteine synthase OS=Bacillus subtilis (strain 168) GN=cysK PE=1 SV=3	Cytoplasmic Protein	4	90.2
Bacillus	Firmicutes	Bacillus subtilis	sp|Q5RIA9|CBWD5_HUMAN COBW domain-containing protein 5 OS=Homo sapiens GN=CBWD5 PE=2 SV=1	sp|P94400|YCIC_BACSU Putative metal chaperone YciC OS=Bacillus subtilis (strain 168) GN=yciC PE=2 SV=1	Cytoplasmic Protein	1	53.1
Bacillus	Firmicutes	Bacillus subtilis	sp|P04040|CATA_HUMAN Catalase OS=Homo sapiens GN=CAT PE=1 SV=3	sp|P26901|CATA_BACSU Vegetative catalase OS=Bacillus subtilis (strain 168) GN=katA PE=1 SV=5	Cytoplasmic Protein	4	90.2
Bacillus	Firmicutes	Lactobacillus sakei	sp|P04040|CATA_HUMAN Catalase OS=Homo sapiens GN=CAT PE=1 SV=3	sp|P30265|CATA_LACSK Catalase OS=Lactobacillus sakei GN=katA PE=3 SV=2	Periplasmic Protein	4	90.2
Bacillus	Firmicutes	Bacillus subtilis	sp|P04040|CATA_HUMAN Catalase OS=Homo sapiens GN=CAT PE=1 SV=3	sp|P94377|CATX_BACSU Catalase X OS=Bacillus subtilis (strain 168) GN=katX PE=3 SV=1	Extracellular Protein	1	53.1
Bacillus	Firmicutes	Bacillus subtilis	sp|P04040|CATA_HUMAN Catalase OS=Homo sapiens GN=CAT PE=1 SV=3	sp|P42234|CATE_BACSU Catalase-2 OS=Bacillus subtilis (strain 168) GN=katE PE=3 SV=2	Cytoplasmic Protein	4	90.2
Bacillus	Firmicutes	Bacillus subtilis	sp|Q9UKY3|CES1P_HUMAN Putative inactive carboxylesterase 4 OS=Homo sapiens GN=CES1P1 PE=5 SV=2	sp|P37967|PNBA_BACSU Para-nitrobenzyl esterase OS=Bacillus subtilis (strain 168) GN=pnbA PE=1 SV=2	Periplasmic Protein	1	53.1
Bacillus	Firmicutes	Bacillus subtilis	sp|P32320|CDD_HUMAN Cytidine deaminase OS=Homo sapiens GN=CDA PE=1 SV=2	sp|P19079|CDD_BACSU Cytidine deaminase OS=Bacillus subtilis (strain 168) GN=cdd PE=1 SV=1	Cytoplasmic Protein	4	90.2
Bacillus	Firmicutes	Bacillus halodurans	sp|P32320|CDD_HUMAN Cytidine deaminase OS=Homo sapiens GN=CDA PE=1 SV=2	sp|Q9KD53|CDD_BACHD Cytidine deaminase OS=Bacillus halodurans (strain ATCC BAA-125 / DSM 18197 / FERM 7344 / JCM 9153 / C-125) GN=cdd PE=3 SV=1	Cytoplasmic Protein	4	90.2
Bacillus	Firmicutes	Bacillus licheniformis	sp|P13569|CFTR_HUMAN Cystic fibrosis transmembrane conductance regulator OS=Homo sapiens GN=CFTR PE=1 SV=3	sp|Q65P76|ECFA2_BACLD Energy-coupling factor transporter ATP-binding protein EcfA2 OS=Bacillus licheniformis (strain ATCC 14580 / DSM 13 / JCM 2505 / NBRC 12200 / NCIMB 9375 / NRRL NRS-1264 / Gibson 46) GN=ecfA2 PE=3 SV=1	Cytoplasmic Protein	4	90.2
Bacillus	Firmicutes	Bacillus licheniformis	sp|P10809|CH60_HUMAN 60 kDa heat shock protein, mitochondrial OS=Homo sapiens GN=HSPD1 PE=1 SV=2	sp|Q65MZ8|CH60_BACLD 60 kDa chaperonin OS=Bacillus licheniformis (strain ATCC 14580 / DSM 13 / JCM 2505 / NBRC 12200 / NCIMB 9375 / NRRL NRS-1264 / Gibson 46) GN=groL PE=3 SV=1	Cytoplasmic Protein	4	90.2
Bacillus	Firmicutes	Bacillus clausii	sp|P10809|CH60_HUMAN 60 kDa heat shock protein, mitochondrial OS=Homo sapiens GN=HSPD1 PE=1 SV=2	sp|Q5WJN4|CH60_BACSK 60 kDa chaperonin OS=Bacillus clausii (strain KSM-K16) GN=groL PE=3 SV=1	Cytoplasmic Protein	4	90.2
Bacillus	Firmicutes	Bacillus methylotrophicus	sp|P10809|CH60_HUMAN 60 kDa heat shock protein, mitochondrial OS=Homo sapiens GN=HSPD1 PE=1 SV=2	sp|A7Z207|CH60_BACMF 60 kDa chaperonin OS=Bacillus methylotrophicus (strain DSM 23117 / BGSC 10A6 / FZB42) GN=groL PE=3 SV=1	Cytoplasmic Protein	1	53.1
Bacillus	Firmicutes	Bacillus pumilus	sp|P10809|CH60_HUMAN 60 kDa heat shock protein, mitochondrial OS=Homo sapiens GN=HSPD1 PE=1 SV=2	sp|A8FAG3|CH60_BACP2 60 kDa chaperonin OS=Bacillus pumilus (strain SAFR-032) GN=groL PE=3 SV=1	Cytoplasmic Protein	4	90.2
Bacillus	Firmicutes	Bacillus halodurans	sp|P10809|CH60_HUMAN 60 kDa heat shock protein, mitochondrial OS=Homo sapiens GN=HSPD1 PE=1 SV=2	sp|O50305|CH60_BACHD 60 kDa chaperonin OS=Bacillus halodurans (strain ATCC BAA-125 / DSM 18197 / FERM 7344 / JCM 9153 / C-125) GN=groL PE=2 SV=2	Cytoplasmic Protein	4	90.2
Bacillus	Firmicutes	Bacillus pumilus	sp|O76031|CLPX_HUMAN ATP-dependent Clp protease ATP-binding subunit clpX-like, mitochondrial OS=Homo sapiens GN=CLPX PE=1 SV=2	sp|A8FFV9|CLPX_BACP2 ATP-dependent Clp protease ATP-binding subunit ClpX OS=Bacillus pumilus (strain SAFR-032) GN=clpX PE=3 SV=1	Cytoplasmic Protein	4	90.2
Bacillus	Firmicutes	Bacillus licheniformis	sp|O76031|CLPX_HUMAN ATP-dependent Clp protease ATP-binding subunit clpX-like, mitochondrial OS=Homo sapiens GN=CLPX PE=1 SV=2	sp|Q65GJ4|CLPX_BACLD ATP-dependent Clp protease ATP-binding subunit ClpX OS=Bacillus licheniformis (strain ATCC 14580 / DSM 13 / JCM 2505 / NBRC 12200 / NCIMB 9375 / NRRL NRS-1264 / Gibson 46) GN=clpX PE=3 SV=1	Cytoplasmic Protein	4	90.2
Bacillus	Firmicutes	Bacillus subtilis	sp|O76031|CLPX_HUMAN ATP-dependent Clp protease ATP-binding subunit clpX-like, mitochondrial OS=Homo sapiens GN=CLPX PE=1 SV=2	sp|P50866|CLPX_BACSU ATP-dependent Clp protease ATP-binding subunit ClpX OS=Bacillus subtilis (strain 168) GN=clpX PE=2 SV=3	Cytoplasmic Protein	4	90.2
Bacillus	Firmicutes	Bacillus thuringiensis	sp|O76031|CLPX_HUMAN ATP-dependent Clp protease ATP-binding subunit clpX-like, mitochondrial OS=Homo sapiens GN=CLPX PE=1 SV=2	sp|Q6HD54|CLPX_BACHK ATP-dependent Clp protease ATP-binding subunit ClpX OS=Bacillus thuringiensis subsp. konkukian (strain 97-27) GN=clpX PE=3 SV=1	Cytoplasmic Protein	4	90.2
Bacillus	Firmicutes	Bacillus cereus	sp|O76031|CLPX_HUMAN ATP-dependent Clp protease ATP-binding subunit clpX-like, mitochondrial OS=Homo sapiens GN=CLPX PE=1 SV=2	sp|Q633X2|CLPX_BACCZ ATP-dependent Clp protease ATP-binding subunit ClpX OS=Bacillus cereus (strain ZK / E33L) GN=clpX PE=3 SV=1	Cytoplasmic Protein	1	53.1
Bacillus	Firmicutes	Bacillus cereus	sp|O76031|CLPX_HUMAN ATP-dependent Clp protease ATP-binding subunit clpX-like, mitochondrial OS=Homo sapiens GN=CLPX PE=1 SV=2	sp|B7HQN2|CLPX_BACC7 ATP-dependent Clp protease ATP-binding subunit ClpX OS=Bacillus cereus (strain AH187) GN=clpX PE=3 SV=1	Cytoplasmic Protein	4	90.2
Bacillus	Firmicutes	Bacillus cereus	sp|O76031|CLPX_HUMAN ATP-dependent Clp protease ATP-binding subunit clpX-like, mitochondrial OS=Homo sapiens GN=CLPX PE=1 SV=2	sp|B9IZ47|CLPX_BACCQ ATP-dependent Clp protease ATP-binding subunit ClpX OS=Bacillus cereus (strain Q1) GN=clpX PE=3 SV=1	Cytoplasmic Protein	5	98.1
Bacillus	Firmicutes	Bacillus cereus	sp|O76031|CLPX_HUMAN ATP-dependent Clp protease ATP-binding subunit clpX-like, mitochondrial OS=Homo sapiens GN=CLPX PE=1 SV=2	sp|C1ETR8|CLPX_BACC3 ATP-dependent Clp protease ATP-binding subunit ClpX OS=Bacillus cereus (strain 03BB102) GN=clpX PE=3 SV=1	Cytoplasmic Protein	5	98.1
Bacillus	Firmicutes	Bacillus cereus	sp|O76031|CLPX_HUMAN ATP-dependent Clp protease ATP-binding subunit clpX-like, mitochondrial OS=Homo sapiens GN=CLPX PE=1 SV=2	sp|Q72ZV4|CLPX_BACC1 ATP-dependent Clp protease ATP-binding subunit ClpX OS=Bacillus cereus (strain ATCC 10987 / NRS 248) GN=clpX PE=3 SV=1	Cytoplasmic Protein	1	53.1
Bacillus	Firmicutes	Bacillus cereus	sp|O76031|CLPX_HUMAN ATP-dependent Clp protease ATP-binding subunit clpX-like, mitochondrial OS=Homo sapiens GN=CLPX PE=1 SV=2	sp|B7JQ65|CLPX_BACC0 ATP-dependent Clp protease ATP-binding subunit ClpX OS=Bacillus cereus (strain AH820) GN=clpX PE=3 SV=1	Cytoplasmic Protein	1	53.1
Bacillus	Firmicutes	Bacillus anthracis	sp|O76031|CLPX_HUMAN ATP-dependent Clp protease ATP-binding subunit clpX-like, mitochondrial OS=Homo sapiens GN=CLPX PE=1 SV=2	sp|Q81LB9|CLPX_BACAN ATP-dependent Clp protease ATP-binding subunit ClpX OS=Bacillus anthracis GN=clpX PE=3 SV=1	Cytoplasmic Protein	4	90.2
Bacillus	Firmicutes	Bacillus anthracis	sp|O76031|CLPX_HUMAN ATP-dependent Clp protease ATP-binding subunit clpX-like, mitochondrial OS=Homo sapiens GN=CLPX PE=1 SV=2	sp|C3L704|CLPX_BACAC ATP-dependent Clp protease ATP-binding subunit ClpX OS=Bacillus anthracis (strain CDC 684 / NRRL 3495) GN=clpX PE=3 SV=1	Cytoplasmic Protein	4	90.2
Bacillus	Firmicutes	Bacillus anthracis	sp|O76031|CLPX_HUMAN ATP-dependent Clp protease ATP-binding subunit clpX-like, mitochondrial OS=Homo sapiens GN=CLPX PE=1 SV=2	sp|C3P9F7|CLPX_BACAA ATP-dependent Clp protease ATP-binding subunit ClpX OS=Bacillus anthracis (strain A0248) GN=clpX PE=3 SV=1	Cytoplasmic Protein	4	90.2
Bacillus	Firmicutes	Bacillus methylotrophicus	sp|O76031|CLPX_HUMAN ATP-dependent Clp protease ATP-binding subunit clpX-like, mitochondrial OS=Homo sapiens GN=CLPX PE=1 SV=2	sp|A7Z7B2|CLPX_BACMF ATP-dependent Clp protease ATP-binding subunit ClpX OS=Bacillus methylotrophicus (strain DSM 23117 / BGSC 10A6 / FZB42) GN=clpX PE=3 SV=1	Cytoplasmic Protein	4	90.2
Bacillus	Firmicutes	Bacillus cereus	sp|O76031|CLPX_HUMAN ATP-dependent Clp protease ATP-binding subunit clpX-like, mitochondrial OS=Homo sapiens GN=CLPX PE=1 SV=2	sp|Q817Q2|CLPX_BACCR ATP-dependent Clp protease ATP-binding subunit ClpX OS=Bacillus cereus (strain ATCC 14579 / DSM 31 / JCM 2152 / NBRC 15305 / NCIMB 9373 / NRRL B-3711) GN=clpX PE=3 SV=1	Cytoplasmic Protein	1	53.1
Bacillus	Firmicutes	Bacillus cereus	sp|O76031|CLPX_HUMAN ATP-dependent Clp protease ATP-binding subunit clpX-like, mitochondrial OS=Homo sapiens GN=CLPX PE=1 SV=2	sp|B7HEA4|CLPX_BACC4 ATP-dependent Clp protease ATP-binding subunit ClpX OS=Bacillus cereus (strain B4264) GN=clpX PE=3 SV=1	Cytoplasmic Protein	4	90.2
Bacillus	Firmicutes	Bacillus cereus	sp|O76031|CLPX_HUMAN ATP-dependent Clp protease ATP-binding subunit clpX-like, mitochondrial OS=Homo sapiens GN=CLPX PE=1 SV=2	sp|B7IIY3|CLPX_BACC2 ATP-dependent Clp protease ATP-binding subunit ClpX OS=Bacillus cereus (strain G9842) GN=clpX PE=3 SV=1	Cytoplasmic Protein	1	53.1
Bacillus	Firmicutes	Lactobacillus reuteri	sp|O76031|CLPX_HUMAN ATP-dependent Clp protease ATP-binding subunit clpX-like, mitochondrial OS=Homo sapiens GN=CLPX PE=1 SV=2	sp|A5VJ94|CLPX_LACRD ATP-dependent Clp protease ATP-binding subunit ClpX OS=Lactobacillus reuteri (strain DSM 20016) GN=clpX PE=3 SV=1	Cytoplasmic Protein	4	90.2
Bacillus	Firmicutes	Bacillus cytotoxicus	sp|O76031|CLPX_HUMAN ATP-dependent Clp protease ATP-binding subunit clpX-like, mitochondrial OS=Homo sapiens GN=CLPX PE=1 SV=2	sp|A7GTF1|CLPX_BACCN ATP-dependent Clp protease ATP-binding subunit ClpX OS=Bacillus cytotoxicus (strain DSM 22905 / CIP 110041 / 391-98 / NVH 391-98) GN=clpX PE=3 SV=1	Cytoplasmic Protein	4	90.2
Bacillus	Firmicutes	Lactobacillus plantarum	sp|O76031|CLPX_HUMAN ATP-dependent Clp protease ATP-binding subunit clpX-like, mitochondrial OS=Homo sapiens GN=CLPX PE=1 SV=2	sp|Q88VE2|CLPX_LACPL ATP-dependent Clp protease ATP-binding subunit ClpX OS=Lactobacillus plantarum (strain ATCC BAA-793 / NCIMB 8826 / WCFS1) GN=clpX PE=3 SV=1	Cytoplasmic Protein	4	90.2
Bacillus	Firmicutes	Lactobacillus salivarius	sp|O76031|CLPX_HUMAN ATP-dependent Clp protease ATP-binding subunit clpX-like, mitochondrial OS=Homo sapiens GN=CLPX PE=1 SV=2	sp|Q1WU81|CLPX_LACS1 ATP-dependent Clp protease ATP-binding subunit ClpX OS=Lactobacillus salivarius (strain UCC118) GN=clpX PE=3 SV=1	Cytoplasmic Protein	4	90.2
Bacillus	Firmicutes	Bacillus clausii	sp|O76031|CLPX_HUMAN ATP-dependent Clp protease ATP-binding subunit clpX-like, mitochondrial OS=Homo sapiens GN=CLPX PE=1 SV=2	sp|Q5WEN9|CLPX_BACSK ATP-dependent Clp protease ATP-binding subunit ClpX OS=Bacillus clausii (strain KSM-K16) GN=clpX PE=3 SV=1	Cytoplasmic Protein	4	90.2
Bacillus	Firmicutes	Lactobacillus brevis	sp|O76031|CLPX_HUMAN ATP-dependent Clp protease ATP-binding subunit clpX-like, mitochondrial OS=Homo sapiens GN=CLPX PE=1 SV=2	sp|Q03QN7|CLPX_LACBA ATP-dependent Clp protease ATP-binding subunit ClpX OS=Lactobacillus brevis (strain ATCC 367 / JCM 1170) GN=clpX PE=3 SV=1	Cytoplasmic Protein	4	90.2
Bacillus	Firmicutes	Lactobacillus gasseri	sp|O76031|CLPX_HUMAN ATP-dependent Clp protease ATP-binding subunit clpX-like, mitochondrial OS=Homo sapiens GN=CLPX PE=1 SV=2	sp|Q042T7|CLPX_LACGA ATP-dependent Clp protease ATP-binding subunit ClpX OS=Lactobacillus gasseri (strain ATCC 33323 / DSM 20243 / JCM 1131 / NCIMB 11718 / AM63) GN=clpX PE=3 SV=1	Cytoplasmic Protein	1	53.1
Bacillus	Firmicutes	Bacillus halodurans	sp|O76031|CLPX_HUMAN ATP-dependent Clp protease ATP-binding subunit clpX-like, mitochondrial OS=Homo sapiens GN=CLPX PE=1 SV=2	sp|Q9K8F4|CLPX_BACHD ATP-dependent Clp protease ATP-binding subunit ClpX OS=Bacillus halodurans (strain ATCC BAA-125 / DSM 18197 / FERM 7344 / JCM 9153 / C-125) GN=clpX PE=3 SV=1	Cytoplasmic Protein	1	53.1
Bacillus	Firmicutes	Lactobacillus helveticus	sp|O76031|CLPX_HUMAN ATP-dependent Clp protease ATP-binding subunit clpX-like, mitochondrial OS=Homo sapiens GN=CLPX PE=1 SV=2	sp|A8YUS4|CLPX_LACH4 ATP-dependent Clp protease ATP-binding subunit ClpX OS=Lactobacillus helveticus (strain DPC 4571) GN=clpX PE=3 SV=1	Cytoplasmic Protein	4	90.2
Bacillus	Firmicutes	Lactobacillus johnsonii	sp|O76031|CLPX_HUMAN ATP-dependent Clp protease ATP-binding subunit clpX-like, mitochondrial OS=Homo sapiens GN=CLPX PE=1 SV=2	sp|Q74JU4|CLPX_LACJO ATP-dependent Clp protease ATP-binding subunit ClpX OS=Lactobacillus johnsonii (strain CNCM I-12250 / La1 / NCC 533) GN=clpX PE=3 SV=1	Cytoplasmic Protein	4	90.2
Bacillus	Firmicutes	Lactobacillus fermentum	sp|Q16740|CLPP_HUMAN ATP-dependent Clp protease proteolytic subunit, mitochondrial OS=Homo sapiens GN=CLPP PE=1 SV=1	sp|B2GAL4|CLPP_LACF3 ATP-dependent Clp protease proteolytic subunit OS=Lactobacillus fermentum (strain NBRC 3956 / LMG 18251) GN=clpP PE=3 SV=1	Cytoplasmic Protein	3	71.1
Bacillus	Firmicutes	Lactobacillus casei	sp|Q16740|CLPP_HUMAN ATP-dependent Clp protease proteolytic subunit, mitochondrial OS=Homo sapiens GN=CLPP PE=1 SV=1	sp|B3WCR2|CLPP_LACCB ATP-dependent Clp protease proteolytic subunit OS=Lactobacillus casei (strain BL23) GN=clpP PE=3 SV=1	Cytoplasmic Protein	4	90.2
Bacillus	Firmicutes	Lactobacillus casei	sp|Q16740|CLPP_HUMAN ATP-dependent Clp protease proteolytic subunit, mitochondrial OS=Homo sapiens GN=CLPP PE=1 SV=1	sp|Q03AL0|CLPP_LACC3 ATP-dependent Clp protease proteolytic subunit OS=Lactobacillus casei (strain ATCC 334) GN=clpP PE=3 SV=1	Cytoplasmic Protein	4	90.2
Bacillus	Firmicutes	Bacillus methylotrophicus	sp|Q16740|CLPP_HUMAN ATP-dependent Clp protease proteolytic subunit, mitochondrial OS=Homo sapiens GN=CLPP PE=1 SV=1	sp|A7Z939|CLPP_BACMF ATP-dependent Clp protease proteolytic subunit OS=Bacillus methylotrophicus (strain DSM 23117 / BGSC 10A6 / FZB42) GN=clpP PE=3 SV=1	Cytoplasmic Protein	4	90.2
Bacillus	Firmicutes	Lactobacillus plantarum	sp|Q16740|CLPP_HUMAN ATP-dependent Clp protease proteolytic subunit, mitochondrial OS=Homo sapiens GN=CLPP PE=1 SV=1	sp|Q88YH9|CLPP_LACPL ATP-dependent Clp protease proteolytic subunit OS=Lactobacillus plantarum (strain ATCC BAA-793 / NCIMB 8826 / WCFS1) GN=clpP PE=3 SV=1	Cytoplasmic Protein	4	90.2
Bacillus	Firmicutes	Bacillus subtilis	sp|Q16740|CLPP_HUMAN ATP-dependent Clp protease proteolytic subunit, mitochondrial OS=Homo sapiens GN=CLPP PE=1 SV=1	sp|P80244|CLPP_BACSU ATP-dependent Clp protease proteolytic subunit OS=Bacillus subtilis (strain 168) GN=clpP PE=1 SV=3	Cytoplasmic Protein	4	90.2
Bacillus	Firmicutes	Bacillus licheniformis	sp|Q16740|CLPP_HUMAN ATP-dependent Clp protease proteolytic subunit, mitochondrial OS=Homo sapiens GN=CLPP PE=1 SV=1	sp|Q65EI5|CLPP1_BACLD ATP-dependent Clp protease proteolytic subunit 1 OS=Bacillus licheniformis (strain ATCC 14580 / DSM 13 / JCM 2505 / NBRC 12200 / NCIMB 9375 / NRRL NRS-1264 / Gibson 46) GN=clpP1 PE=3 SV=1	Cytoplasmic Protein	4	90.2
Bacillus	Firmicutes	Lactobacillus johnsonii	sp|Q16740|CLPP_HUMAN ATP-dependent Clp protease proteolytic subunit, mitochondrial OS=Homo sapiens GN=CLPP PE=1 SV=1	sp|Q74K84|CLPP_LACJO ATP-dependent Clp protease proteolytic subunit OS=Lactobacillus johnsonii (strain CNCM I-12250 / La1 / NCC 533) GN=clpP PE=3 SV=1	Cytoplasmic Protein	4	90.2
Bacillus	Firmicutes	Lactobacillus gasseri	sp|Q16740|CLPP_HUMAN ATP-dependent Clp protease proteolytic subunit, mitochondrial OS=Homo sapiens GN=CLPP PE=1 SV=1	sp|Q042E8|CLPP_LACGA ATP-dependent Clp protease proteolytic subunit OS=Lactobacillus gasseri (strain ATCC 33323 / DSM 20243 / JCM 1131 / NCIMB 11718 / AM63) GN=clpP PE=3 SV=1	Cytoplasmic Protein	1	53.1
Bacillus	Firmicutes	Lactobacillus delbrueckii	sp|Q16740|CLPP_HUMAN ATP-dependent Clp protease proteolytic subunit, mitochondrial OS=Homo sapiens GN=CLPP PE=1 SV=1	sp|Q1GB31|CLPP_LACDA ATP-dependent Clp protease proteolytic subunit OS=Lactobacillus delbrueckii subsp. bulgaricus (strain ATCC 11842 / DSM 20081 / JCM 1002 / NBRC 13953 / NCIMB 11778) GN=clpP PE=3 SV=1	Cytoplasmic Protein	1	53.1
Bacillus	Firmicutes	Lactobacillus delbrueckii	sp|Q16740|CLPP_HUMAN ATP-dependent Clp protease proteolytic subunit, mitochondrial OS=Homo sapiens GN=CLPP PE=1 SV=1	sp|Q04BH7|CLPP_LACDB ATP-dependent Clp protease proteolytic subunit OS=Lactobacillus delbrueckii subsp. bulgaricus (strain ATCC BAA-365) GN=clpP PE=3 SV=1	Cytoplasmic Protein	4	90.2
Bacillus	Firmicutes	Bacillus cereus	sp|Q16740|CLPP_HUMAN ATP-dependent Clp protease proteolytic subunit, mitochondrial OS=Homo sapiens GN=CLPP PE=1 SV=1	sp|Q631K2|CLPP2_BACCZ ATP-dependent Clp protease proteolytic subunit 2 OS=Bacillus cereus (strain ZK / E33L) GN=clpP2 PE=3 SV=1	Cytoplasmic Protein	1	53.1
Bacillus	Firmicutes	Bacillus thuringiensis	sp|Q16740|CLPP_HUMAN ATP-dependent Clp protease proteolytic subunit, mitochondrial OS=Homo sapiens GN=CLPP PE=1 SV=1	sp|Q6HBD8|CLPP2_BACHK ATP-dependent Clp protease proteolytic subunit 2 OS=Bacillus thuringiensis subsp. konkukian (strain 97-27) GN=clpP2 PE=3 SV=1	Cytoplasmic Protein	4	90.2
Bacillus	Firmicutes	Bacillus cereus	sp|Q16740|CLPP_HUMAN ATP-dependent Clp protease proteolytic subunit, mitochondrial OS=Homo sapiens GN=CLPP PE=1 SV=1	sp|Q815J6|CLPP2_BACCR ATP-dependent Clp protease proteolytic subunit 2 OS=Bacillus cereus (strain ATCC 14579 / DSM 31 / JCM 2152 / NBRC 15305 / NCIMB 9373 / NRRL B-3711) GN=clpP2 PE=3 SV=1	Cytoplasmic Protein	4	90.2
Bacillus	Firmicutes	Bacillus cereus	sp|Q16740|CLPP_HUMAN ATP-dependent Clp protease proteolytic subunit, mitochondrial OS=Homo sapiens GN=CLPP PE=1 SV=1	sp|Q72XW9|CLPP2_BACC1 ATP-dependent Clp protease proteolytic subunit 2 OS=Bacillus cereus (strain ATCC 10987 / NRS 248) GN=clpP2 PE=3 SV=1	Cytoplasmic Protein	1	53.1
Bacillus	Firmicutes	Lactobacillus acidophilus	sp|Q16740|CLPP_HUMAN ATP-dependent Clp protease proteolytic subunit, mitochondrial OS=Homo sapiens GN=CLPP PE=1 SV=1	sp|Q5FL55|CLPP_LACAC ATP-dependent Clp protease proteolytic subunit OS=Lactobacillus acidophilus (strain ATCC 700396 / NCK56 / N2 / NCFM) GN=clpP PE=3 SV=1	Cytoplasmic Protein	4	90.2
Bacillus	Firmicutes	Bacillus pumilus	sp|Q16740|CLPP_HUMAN ATP-dependent Clp protease proteolytic subunit, mitochondrial OS=Homo sapiens GN=CLPP PE=1 SV=1	sp|A8FHN9|CLPP_BACP2 ATP-dependent Clp protease proteolytic subunit OS=Bacillus pumilus (strain SAFR-032) GN=clpP PE=3 SV=1	Cytoplasmic Protein	4	90.2
Bacillus	Firmicutes	Bacillus anthracis	sp|Q16740|CLPP_HUMAN ATP-dependent Clp protease proteolytic subunit, mitochondrial OS=Homo sapiens GN=CLPP PE=1 SV=1	sp|Q81X63|CLPP2_BACAN ATP-dependent Clp protease proteolytic subunit 2 OS=Bacillus anthracis GN=clpP2 PE=3 SV=1	Cytoplasmic Protein	1	53.1
Bacillus	Firmicutes	Lactobacillus helveticus	sp|Q16740|CLPP_HUMAN ATP-dependent Clp protease proteolytic subunit, mitochondrial OS=Homo sapiens GN=CLPP PE=1 SV=1	sp|A8YUD9|CLPP_LACH4 ATP-dependent Clp protease proteolytic subunit OS=Lactobacillus helveticus (strain DPC 4571) GN=clpP PE=3 SV=1	Cytoplasmic Protein	4	90.2
Bacillus	Firmicutes	Bacillus halodurans	sp|Q16740|CLPP_HUMAN ATP-dependent Clp protease proteolytic subunit, mitochondrial OS=Homo sapiens GN=CLPP PE=1 SV=1	sp|Q9K709|CLPP1_BACHD ATP-dependent Clp protease proteolytic subunit 1 OS=Bacillus halodurans (strain ATCC BAA-125 / DSM 18197 / FERM 7344 / JCM 9153 / C-125) GN=clpP1 PE=3 SV=1	Cytoplasmic Protein	4	90.2
Bacillus	Firmicutes	Lactobacillus sakei	sp|Q16740|CLPP_HUMAN ATP-dependent Clp protease proteolytic subunit, mitochondrial OS=Homo sapiens GN=CLPP PE=1 SV=1	sp|Q38Y96|CLPP_LACSS ATP-dependent Clp protease proteolytic subunit OS=Lactobacillus sakei subsp. sakei (strain 23K) GN=clpP PE=3 SV=1	Cytoplasmic Protein	1	53.1
Bacillus	Firmicutes	Lactobacillus reuteri	sp|Q16740|CLPP_HUMAN ATP-dependent Clp protease proteolytic subunit, mitochondrial OS=Homo sapiens GN=CLPP PE=1 SV=1	sp|B2G613|CLPP_LACRJ ATP-dependent Clp protease proteolytic subunit OS=Lactobacillus reuteri (strain JCM 1112) GN=clpP PE=3 SV=1	Cytoplasmic Protein	4	90.2
Bacillus	Firmicutes	Lactobacillus reuteri	sp|Q16740|CLPP_HUMAN ATP-dependent Clp protease proteolytic subunit, mitochondrial OS=Homo sapiens GN=CLPP PE=1 SV=1	sp|A5VII4|CLPP_LACRD ATP-dependent Clp protease proteolytic subunit OS=Lactobacillus reuteri (strain DSM 20016) GN=clpP PE=3 SV=1	Cytoplasmic Protein	1	53.1
Bacillus	Firmicutes	Bacillus halodurans	sp|Q16740|CLPP_HUMAN ATP-dependent Clp protease proteolytic subunit, mitochondrial OS=Homo sapiens GN=CLPP PE=1 SV=1	sp|Q9K888|CLPP2_BACHD ATP-dependent Clp protease proteolytic subunit 2 OS=Bacillus halodurans (strain ATCC BAA-125 / DSM 18197 / FERM 7344 / JCM 9153 / C-125) GN=clpP2 PE=3 SV=1	Cytoplasmic Protein	4	90.2
Bacillus	Firmicutes	Lactobacillus brevis	sp|Q16740|CLPP_HUMAN ATP-dependent Clp protease proteolytic subunit, mitochondrial OS=Homo sapiens GN=CLPP PE=1 SV=1	sp|Q03SM3|CLPP_LACBA ATP-dependent Clp protease proteolytic subunit OS=Lactobacillus brevis (strain ATCC 367 / JCM 1170) GN=clpP PE=3 SV=1	Cytoplasmic Protein	4	90.2
Bacillus	Firmicutes	Bacillus clausii	sp|Q16740|CLPP_HUMAN ATP-dependent Clp protease proteolytic subunit, mitochondrial OS=Homo sapiens GN=CLPP PE=1 SV=1	sp|Q5WDK0|CLPP2_BACSK ATP-dependent Clp protease proteolytic subunit 2 OS=Bacillus clausii (strain KSM-K16) GN=clpP2 PE=3 SV=1	Cytoplasmic Protein	4	90.2
Bacillus	Firmicutes	Lactobacillus salivarius	sp|Q16740|CLPP_HUMAN ATP-dependent Clp protease proteolytic subunit, mitochondrial OS=Homo sapiens GN=CLPP PE=1 SV=1	sp|Q1WTA8|CLPP_LACS1 ATP-dependent Clp protease proteolytic subunit OS=Lactobacillus salivarius (strain UCC118) GN=clpP PE=3 SV=1	Cytoplasmic Protein	4	90.2
Bacillus	Firmicutes	Bacillus subtilis	sp|Q9H078|CLPB_HUMAN Caseinolytic peptidase B protein homolog OS=Homo sapiens GN=CLPB PE=1 SV=1	sp|O31673|CLPE_BACSU ATP-dependent Clp protease ATP-binding subunit ClpE OS=Bacillus subtilis (strain 168) GN=clpE PE=1 SV=1	Cytoplasmic Protein	4	90.2
Bacillus	Firmicutes	Bacillus subtilis	sp|P31327|CPSM_HUMAN Carbamoyl-phosphate synthase [ammonia], mitochondrial OS=Homo sapiens GN=CPS1 PE=1 SV=2	sp|P25994|CARB_BACSU Carbamoyl-phosphate synthase pyrimidine-specific large chain OS=Bacillus subtilis (strain 168) GN=pyrAB PE=3 SV=1	Cytoplasmic Protein	4	90.2
Bacillus	Firmicutes	Bacillus cytotoxicus	sp|P31327|CPSM_HUMAN Carbamoyl-phosphate synthase [ammonia], mitochondrial OS=Homo sapiens GN=CPS1 PE=1 SV=2	sp|A7GRL1|CARB_BACCN Carbamoyl-phosphate synthase large chain OS=Bacillus cytotoxicus (strain DSM 22905 / CIP 110041 / 391-98 / NVH 391-98) GN=carB PE=3 SV=1	Cytoplasmic Protein	4	90.2
Bacillus	Firmicutes	Bacillus caldolyticus	sp|P31327|CPSM_HUMAN Carbamoyl-phosphate synthase [ammonia], mitochondrial OS=Homo sapiens GN=CPS1 PE=1 SV=2	sp|P46537|CARB_BACCL Carbamoyl-phosphate synthase pyrimidine-specific large chain OS=Bacillus caldolyticus GN=pyrAB PE=3 SV=1	Cytoplasmic Protein	4	90.2
Bacillus	Firmicutes	Bacillus cereus	sp|P31327|CPSM_HUMAN Carbamoyl-phosphate synthase [ammonia], mitochondrial OS=Homo sapiens GN=CPS1 PE=1 SV=2	sp|B7JJX3|CARB_BACC0 Carbamoyl-phosphate synthase large chain OS=Bacillus cereus (strain AH820) GN=carB PE=3 SV=1	Cytoplasmic Protein	5	98.1
Bacillus	Firmicutes	Bacillus cereus	sp|P31327|CPSM_HUMAN Carbamoyl-phosphate synthase [ammonia], mitochondrial OS=Homo sapiens GN=CPS1 PE=1 SV=2	sp|Q732I3|CARB_BACC1 Carbamoyl-phosphate synthase large chain OS=Bacillus cereus (strain ATCC 10987 / NRS 248) GN=carB PE=3 SV=1	Cytoplasmic Protein	4	90.2
Bacillus	Firmicutes	Bacillus cereus	sp|P31327|CPSM_HUMAN Carbamoyl-phosphate synthase [ammonia], mitochondrial OS=Homo sapiens GN=CPS1 PE=1 SV=2	sp|B7IUP6|CARB_BACC2 Carbamoyl-phosphate synthase large chain OS=Bacillus cereus (strain G9842) GN=carB PE=3 SV=1	Cytoplasmic Protein	1	53.1
Bacillus	Firmicutes	Bacillus cereus	sp|P31327|CPSM_HUMAN Carbamoyl-phosphate synthase [ammonia], mitochondrial OS=Homo sapiens GN=CPS1 PE=1 SV=2	sp|B9IVW3|CARB_BACCQ Carbamoyl-phosphate synthase large chain OS=Bacillus cereus (strain Q1) GN=carB PE=3 SV=1	Cytoplasmic Protein	4	90.2
Bacillus	Firmicutes	Bacillus cereus	sp|P31327|CPSM_HUMAN Carbamoyl-phosphate synthase [ammonia], mitochondrial OS=Homo sapiens GN=CPS1 PE=1 SV=2	sp|B7HLM0|CARB_BACC7 Carbamoyl-phosphate synthase large chain OS=Bacillus cereus (strain AH187) GN=carB PE=3 SV=1	Cytoplasmic Protein	5	98.1
Bacillus	Firmicutes	Bacillus thuringiensis	sp|P31327|CPSM_HUMAN Carbamoyl-phosphate synthase [ammonia], mitochondrial OS=Homo sapiens GN=CPS1 PE=1 SV=2	sp|Q6HES8|CARB_BACHK Carbamoyl-phosphate synthase large chain OS=Bacillus thuringiensis subsp. konkukian (strain 97-27) GN=carB PE=3 SV=1	Cytoplasmic Protein	1	53.1
Bacillus	Firmicutes	Bacillus anthracis	sp|P31327|CPSM_HUMAN Carbamoyl-phosphate synthase [ammonia], mitochondrial OS=Homo sapiens GN=CPS1 PE=1 SV=2	sp|C3P656|CARB_BACAA Carbamoyl-phosphate synthase large chain OS=Bacillus anthracis (strain A0248) GN=carB PE=3 SV=1	Cytoplasmic Protein	4	90.2
Bacillus	Firmicutes	Bacillus anthracis	sp|P31327|CPSM_HUMAN Carbamoyl-phosphate synthase [ammonia], mitochondrial OS=Homo sapiens GN=CPS1 PE=1 SV=2	sp|Q81WF2|CARB_BACAN Carbamoyl-phosphate synthase large chain OS=Bacillus anthracis GN=carB PE=3 SV=1	Cytoplasmic Protein	4	90.2
Bacillus	Firmicutes	Bacillus anthracis	sp|P31327|CPSM_HUMAN Carbamoyl-phosphate synthase [ammonia], mitochondrial OS=Homo sapiens GN=CPS1 PE=1 SV=2	sp|C3L740|CARB_BACAC Carbamoyl-phosphate synthase large chain OS=Bacillus anthracis (strain CDC 684 / NRRL 3495) GN=carB PE=3 SV=1	Cytoplasmic Protein	4	90.2
Bacillus	Firmicutes	Bacillus cereus	sp|P31327|CPSM_HUMAN Carbamoyl-phosphate synthase [ammonia], mitochondrial OS=Homo sapiens GN=CPS1 PE=1 SV=2	sp|C1EPQ0|CARB_BACC3 Carbamoyl-phosphate synthase large chain OS=Bacillus cereus (strain 03BB102) GN=carB PE=3 SV=1	Cytoplasmic Protein	4	90.2
Bacillus	Firmicutes	Bacillus thuringiensis	sp|P31327|CPSM_HUMAN Carbamoyl-phosphate synthase [ammonia], mitochondrial OS=Homo sapiens GN=CPS1 PE=1 SV=2	sp|A0RHQ8|CARB_BACAH Carbamoyl-phosphate synthase large chain OS=Bacillus thuringiensis (strain Al Hakam) GN=carB PE=3 SV=1	Cytoplasmic Protein	4	90.2
Bacillus	Firmicutes	Bacillus weihenstephanensis	sp|P31327|CPSM_HUMAN Carbamoyl-phosphate synthase [ammonia], mitochondrial OS=Homo sapiens GN=CPS1 PE=1 SV=2	sp|A9VTC6|CARB_BACWK Carbamoyl-phosphate synthase large chain OS=Bacillus weihenstephanensis (strain KBAB4) GN=carB PE=3 SV=1	Cytoplasmic Protein	4	90.2
Bacillus	Firmicutes	Bacillus cereus	sp|P31327|CPSM_HUMAN Carbamoyl-phosphate synthase [ammonia], mitochondrial OS=Homo sapiens GN=CPS1 PE=1 SV=2	sp|Q636E0|CARB_BACCZ Carbamoyl-phosphate synthase large chain OS=Bacillus cereus (strain ZK / E33L) GN=carB PE=3 SV=1	Cytoplasmic Protein	1	53.1
Bacillus	Firmicutes	Bacillus cereus	sp|P31327|CPSM_HUMAN Carbamoyl-phosphate synthase [ammonia], mitochondrial OS=Homo sapiens GN=CPS1 PE=1 SV=2	sp|Q819S3|CARB_BACCR Carbamoyl-phosphate synthase large chain OS=Bacillus cereus (strain ATCC 14579 / DSM 31 / JCM 2152 / NBRC 15305 / NCIMB 9373 / NRRL B-3711) GN=carB PE=3 SV=1	Cytoplasmic Protein	4	90.2
Bacillus	Firmicutes	Bacillus cereus	sp|P31327|CPSM_HUMAN Carbamoyl-phosphate synthase [ammonia], mitochondrial OS=Homo sapiens GN=CPS1 PE=1 SV=2	sp|B7H6M2|CARB_BACC4 Carbamoyl-phosphate synthase large chain OS=Bacillus cereus (strain B4264) GN=carB PE=3 SV=1	Cytoplasmic Protein	4	90.2
Bacillus	Firmicutes	Bacillus halodurans	sp|P31327|CPSM_HUMAN Carbamoyl-phosphate synthase [ammonia], mitochondrial OS=Homo sapiens GN=CPS1 PE=1 SV=2	sp|Q9K9V9|CARB_BACHD Carbamoyl-phosphate synthase pyrimidine-specific large chain OS=Bacillus halodurans (strain ATCC BAA-125 / DSM 18197 / FERM 7344 / JCM 9153 / C-125) GN=pyrAB PE=3 SV=1	Cytoplasmic Protein	4	90.2
Bacillus	Firmicutes	Lactobacillus helveticus	sp|P31327|CPSM_HUMAN Carbamoyl-phosphate synthase [ammonia], mitochondrial OS=Homo sapiens GN=CPS1 PE=1 SV=2	sp|A8YVZ3|CARB_LACH4 Carbamoyl-phosphate synthase large chain OS=Lactobacillus helveticus (strain DPC 4571) GN=carB PE=3 SV=1	Cytoplasmic Protein	4	90.2
Bacillus	Firmicutes	Lactobacillus sakei	sp|P31327|CPSM_HUMAN Carbamoyl-phosphate synthase [ammonia], mitochondrial OS=Homo sapiens GN=CPS1 PE=1 SV=2	sp|Q38X24|CARB_LACSS Carbamoyl-phosphate synthase large chain OS=Lactobacillus sakei subsp. sakei (strain 23K) GN=carB PE=3 SV=1	Cytoplasmic Protein	4	90.2
Bacillus	Firmicutes	Lactobacillus delbrueckii	sp|P31327|CPSM_HUMAN Carbamoyl-phosphate synthase [ammonia], mitochondrial OS=Homo sapiens GN=CPS1 PE=1 SV=2	sp|Q047M8|CARB_LACDB Carbamoyl-phosphate synthase large chain OS=Lactobacillus delbrueckii subsp. bulgaricus (strain ATCC BAA-365) GN=carB PE=3 SV=1	Cytoplasmic Protein	4	90.2
Bacillus	Firmicutes	Lactobacillus salivarius	sp|P31327|CPSM_HUMAN Carbamoyl-phosphate synthase [ammonia], mitochondrial OS=Homo sapiens GN=CPS1 PE=1 SV=2	sp|Q1WVA9|CARB_LACS1 Carbamoyl-phosphate synthase large chain OS=Lactobacillus salivarius (strain UCC118) GN=carB PE=3 SV=1	Cytoplasmic Protein	4	90.2
Bacillus	Firmicutes	Lactobacillus acidophilus	sp|P31327|CPSM_HUMAN Carbamoyl-phosphate synthase [ammonia], mitochondrial OS=Homo sapiens GN=CPS1 PE=1 SV=2	sp|Q5FJC0|CARB_LACAC Carbamoyl-phosphate synthase large chain OS=Lactobacillus acidophilus (strain ATCC 700396 / NCK56 / N2 / NCFM) GN=carB PE=3 SV=1	Cytoplasmic Protein	4	90.2
Bacillus	Firmicutes	Lactobacillus johnsonii	sp|P31327|CPSM_HUMAN Carbamoyl-phosphate synthase [ammonia], mitochondrial OS=Homo sapiens GN=CPS1 PE=1 SV=2	sp|Q74J34|CARB_LACJO Carbamoyl-phosphate synthase large chain OS=Lactobacillus johnsonii (strain CNCM I-12250 / La1 / NCC 533) GN=carB PE=3 SV=1	Cytoplasmic Protein	4	90.2
Bacillus	Firmicutes	Lactobacillus fermentum	sp|P31327|CPSM_HUMAN Carbamoyl-phosphate synthase [ammonia], mitochondrial OS=Homo sapiens GN=CPS1 PE=1 SV=2	sp|B2GD06|CARB_LACF3 Carbamoyl-phosphate synthase large chain OS=Lactobacillus fermentum (strain NBRC 3956 / LMG 18251) GN=carB PE=3 SV=1	Cytoplasmic Protein	4	90.2
Bacillus	Firmicutes	Lactobacillus casei	sp|P31327|CPSM_HUMAN Carbamoyl-phosphate synthase [ammonia], mitochondrial OS=Homo sapiens GN=CPS1 PE=1 SV=2	sp|Q038Z2|CARB_LACC3 Carbamoyl-phosphate synthase large chain OS=Lactobacillus casei (strain ATCC 334) GN=carB PE=3 SV=1	Cytoplasmic Protein	4	90.2
Bacillus	Firmicutes	Lactobacillus casei	sp|P31327|CPSM_HUMAN Carbamoyl-phosphate synthase [ammonia], mitochondrial OS=Homo sapiens GN=CPS1 PE=1 SV=2	sp|B3WEF5|CARB_LACCB Carbamoyl-phosphate synthase large chain OS=Lactobacillus casei (strain BL23) GN=carB PE=3 SV=1	Cytoplasmic Protein	4	90.2
Bacillus	Firmicutes	Lactobacillus plantarum	sp|P31327|CPSM_HUMAN Carbamoyl-phosphate synthase [ammonia], mitochondrial OS=Homo sapiens GN=CPS1 PE=1 SV=2	sp|P77886|CARB_LACPL Carbamoyl-phosphate synthase pyrimidine-specific large chain OS=Lactobacillus plantarum (strain ATCC BAA-793 / NCIMB 8826 / WCFS1) GN=pyrAB PE=3 SV=2	Cytoplasmic Protein	1	53.1
Bacillus	Firmicutes	Lactobacillus reuteri	sp|P31327|CPSM_HUMAN Carbamoyl-phosphate synthase [ammonia], mitochondrial OS=Homo sapiens GN=CPS1 PE=1 SV=2	sp|B2G564|CARB_LACRJ Carbamoyl-phosphate synthase large chain OS=Lactobacillus reuteri (strain JCM 1112) GN=carB PE=3 SV=1	Cytoplasmic Protein	4	90.2
Bacillus	Firmicutes	Lactobacillus reuteri	sp|P31327|CPSM_HUMAN Carbamoyl-phosphate synthase [ammonia], mitochondrial OS=Homo sapiens GN=CPS1 PE=1 SV=2	sp|A5VHN6|CARB_LACRD Carbamoyl-phosphate synthase large chain OS=Lactobacillus reuteri (strain DSM 20016) GN=carB PE=3 SV=1	Cytoplasmic Protein	4	90.2
Bacillus	Firmicutes	Lactobacillus plantarum	sp|P31327|CPSM_HUMAN Carbamoyl-phosphate synthase [ammonia], mitochondrial OS=Homo sapiens GN=CPS1 PE=1 SV=2	sp|Q9RLS9|CARY_LACPL Carbamoyl-phosphate synthase arginine-specific large chain OS=Lactobacillus plantarum (strain ATCC BAA-793 / NCIMB 8826 / WCFS1) GN=carB PE=2 SV=3	Cytoplasmic Protein	4	90.2
Bacillus	Firmicutes	Bacillus subtilis	sp|P00395|COX1_HUMAN Cytochrome c oxidase subunit 1 OS=Homo sapiens GN=MT-CO1 PE=1 SV=1	sp|P24010|COX1_BACSU Cytochrome c oxidase subunit 1 OS=Bacillus subtilis (strain 168) GN=ctaD PE=3 SV=3	Inner-membrane Protein	5	98.1
Bacillus	Firmicutes	Bacillus pseudofirmus	sp|P00395|COX1_HUMAN Cytochrome c oxidase subunit 1 OS=Homo sapiens GN=MT-CO1 PE=1 SV=1	sp|Q04440|COX1_BACPE Cytochrome c oxidase subunit 1 OS=Bacillus pseudofirmus (strain OF4) GN=ctaD PE=1 SV=3	Cytoplasmic Protein	4	90.2
Bacillus	Firmicutes	Bacillus sp.	sp|P00395|COX1_HUMAN Cytochrome c oxidase subunit 1 OS=Homo sapiens GN=MT-CO1 PE=1 SV=1	sp|P16262|COX1_BACP3 Cytochrome c oxidase subunit 1 OS=Bacillus sp. (strain PS3) GN=ctaD PE=1 SV=3	Cytoplasmic Protein	4	90.2
Bacillus	Firmicutes	Bacillus cereus	sp|Q8WVB6|CTF18_HUMAN Chromosome transmission fidelity protein 18 homolog OS=Homo sapiens GN=CHTF18 PE=1 SV=1	sp|B7IIT2|RUVB_BACC2 Holliday junction ATP-dependent DNA helicase RuvB OS=Bacillus cereus (strain G9842) GN=ruvB PE=3 SV=1	Cytoplasmic Protein	1	53.1
Bacillus	Firmicutes	Bacillus cereus	sp|Q8WVB6|CTF18_HUMAN Chromosome transmission fidelity protein 18 homolog OS=Homo sapiens GN=CHTF18 PE=1 SV=1	sp|B7HE54|RUVB_BACC4 Holliday junction ATP-dependent DNA helicase RuvB OS=Bacillus cereus (strain B4264) GN=ruvB PE=3 SV=1	Cytoplasmic Protein	1	53.1
Bacillus	Firmicutes	Bacillus cereus	sp|Q8WVB6|CTF18_HUMAN Chromosome transmission fidelity protein 18 homolog OS=Homo sapiens GN=CHTF18 PE=1 SV=1	sp|Q817W4|RUVB_BACCR Holliday junction ATP-dependent DNA helicase RuvB OS=Bacillus cereus (strain ATCC 14579 / DSM 31 / JCM 2152 / NBRC 15305 / NCIMB 9373 / NRRL B-3711) GN=ruvB PE=3 SV=3	Cytoplasmic Protein	4	90.2
Bacillus	Firmicutes	Bacillus cytotoxicus	sp|Q8WVB6|CTF18_HUMAN Chromosome transmission fidelity protein 18 homolog OS=Homo sapiens GN=CHTF18 PE=1 SV=1	sp|A7GTA2|RUVB_BACCN Holliday junction ATP-dependent DNA helicase RuvB OS=Bacillus cytotoxicus (strain DSM 22905 / CIP 110041 / 391-98 / NVH 391-98) GN=ruvB PE=3 SV=1	Cytoplasmic Protein	1	53.1
Bacillus	Firmicutes	Bacillus weihenstephanensis	sp|Q8WVB6|CTF18_HUMAN Chromosome transmission fidelity protein 18 homolog OS=Homo sapiens GN=CHTF18 PE=1 SV=1	sp|A9VIP6|RUVB_BACWK Holliday junction ATP-dependent DNA helicase RuvB OS=Bacillus weihenstephanensis (strain KBAB4) GN=ruvB PE=3 SV=1	Cytoplasmic Protein	1	53.1
Bacillus	Firmicutes	Bacillus methylotrophicus	sp|Q8WVB6|CTF18_HUMAN Chromosome transmission fidelity protein 18 homolog OS=Homo sapiens GN=CHTF18 PE=1 SV=1	sp|A7Z768|RUVB_BACMF Holliday junction ATP-dependent DNA helicase RuvB OS=Bacillus methylotrophicus (strain DSM 23117 / BGSC 10A6 / FZB42) GN=ruvB PE=3 SV=1	Cytoplasmic Protein	4	90.2
Bacillus	Firmicutes	Lactobacillus johnsonii	sp|Q8WVB6|CTF18_HUMAN Chromosome transmission fidelity protein 18 homolog OS=Homo sapiens GN=CHTF18 PE=1 SV=1	sp|P61533|RUVB_LACJO Holliday junction ATP-dependent DNA helicase RuvB OS=Lactobacillus johnsonii (strain CNCM I-12250 / La1 / NCC 533) GN=ruvB PE=3 SV=1	Cytoplasmic Protein	1	53.1
Bacillus	Firmicutes	Bacillus cereus	sp|Q8WVB6|CTF18_HUMAN Chromosome transmission fidelity protein 18 homolog OS=Homo sapiens GN=CHTF18 PE=1 SV=1	sp|B7HQH9|RUVB_BACC7 Holliday junction ATP-dependent DNA helicase RuvB OS=Bacillus cereus (strain AH187) GN=ruvB PE=3 SV=1	Cytoplasmic Protein	4	90.2
Bacillus	Firmicutes	Bacillus cereus	sp|Q8WVB6|CTF18_HUMAN Chromosome transmission fidelity protein 18 homolog OS=Homo sapiens GN=CHTF18 PE=1 SV=1	sp|P61528|RUVB_BACC1 Holliday junction ATP-dependent DNA helicase RuvB OS=Bacillus cereus (strain ATCC 10987 / NRS 248) GN=ruvB PE=3 SV=1	Cytoplasmic Protein	4	90.2
Bacillus	Firmicutes	Lactobacillus gasseri	sp|Q8WVB6|CTF18_HUMAN Chromosome transmission fidelity protein 18 homolog OS=Homo sapiens GN=CHTF18 PE=1 SV=1	sp|Q045Q2|RUVB_LACGA Holliday junction ATP-dependent DNA helicase RuvB OS=Lactobacillus gasseri (strain ATCC 33323 / DSM 20243 / JCM 1131 / NCIMB 11718 / AM63) GN=ruvB PE=3 SV=1	Cytoplasmic Protein	4	90.2
Bacillus	Firmicutes	Bacillus cereus	sp|Q8WVB6|CTF18_HUMAN Chromosome transmission fidelity protein 18 homolog OS=Homo sapiens GN=CHTF18 PE=1 SV=1	sp|B9IYZ4|RUVB_BACCQ Holliday junction ATP-dependent DNA helicase RuvB OS=Bacillus cereus (strain Q1) GN=ruvB PE=3 SV=1	Cytoplasmic Protein	4	90.2
Bacillus	Firmicutes	Bacillus cereus	sp|Q8WVB6|CTF18_HUMAN Chromosome transmission fidelity protein 18 homolog OS=Homo sapiens GN=CHTF18 PE=1 SV=1	sp|Q634C4|RUVB_BACCZ Holliday junction ATP-dependent DNA helicase RuvB OS=Bacillus cereus (strain ZK / E33L) GN=ruvB PE=3 SV=1	Cytoplasmic Protein	4	90.2
Bacillus	Firmicutes	Bacillus thuringiensis	sp|Q8WVB6|CTF18_HUMAN Chromosome transmission fidelity protein 18 homolog OS=Homo sapiens GN=CHTF18 PE=1 SV=1	sp|Q6HDA6|RUVB_BACHK Holliday junction ATP-dependent DNA helicase RuvB OS=Bacillus thuringiensis subsp. konkukian (strain 97-27) GN=ruvB PE=3 SV=1	Cytoplasmic Protein	4	90.2
Bacillus	Firmicutes	Bacillus cereus	sp|Q8WVB6|CTF18_HUMAN Chromosome transmission fidelity protein 18 homolog OS=Homo sapiens GN=CHTF18 PE=1 SV=1	sp|C1ESW4|RUVB_BACC3 Holliday junction ATP-dependent DNA helicase RuvB OS=Bacillus cereus (strain 03BB102) GN=ruvB PE=3 SV=1	Cytoplasmic Protein	1	53.1
Bacillus	Firmicutes	Bacillus anthracis	sp|Q8WVB6|CTF18_HUMAN Chromosome transmission fidelity protein 18 homolog OS=Homo sapiens GN=CHTF18 PE=1 SV=1	sp|Q81LG9|RUVB_BACAN Holliday junction ATP-dependent DNA helicase RuvB OS=Bacillus anthracis GN=ruvB PE=3 SV=1	Cytoplasmic Protein	4	90.2
Bacillus	Firmicutes	Bacillus anthracis	sp|Q8WVB6|CTF18_HUMAN Chromosome transmission fidelity protein 18 homolog OS=Homo sapiens GN=CHTF18 PE=1 SV=1	sp|C3L6U9|RUVB_BACAC Holliday junction ATP-dependent DNA helicase RuvB OS=Bacillus anthracis (strain CDC 684 / NRRL 3495) GN=ruvB PE=3 SV=1	Inner-membrane Protein	4	90.2
Bacillus	Firmicutes	Bacillus anthracis	sp|Q8WVB6|CTF18_HUMAN Chromosome transmission fidelity protein 18 homolog OS=Homo sapiens GN=CHTF18 PE=1 SV=1	sp|C3P9A7|RUVB_BACAA Holliday junction ATP-dependent DNA helicase RuvB OS=Bacillus anthracis (strain A0248) GN=ruvB PE=3 SV=1	Cytoplasmic Protein	4	90.2
Bacillus	Firmicutes	Bacillus thuringiensis	sp|Q8WVB6|CTF18_HUMAN Chromosome transmission fidelity protein 18 homolog OS=Homo sapiens GN=CHTF18 PE=1 SV=1	sp|A0RJ26|RUVB_BACAH Holliday junction ATP-dependent DNA helicase RuvB OS=Bacillus thuringiensis (strain Al Hakam) GN=ruvB PE=3 SV=1	Cytoplasmic Protein	4	90.2
Bacillus	Firmicutes	Lactobacillus delbrueckii	sp|Q8WVB6|CTF18_HUMAN Chromosome transmission fidelity protein 18 homolog OS=Homo sapiens GN=CHTF18 PE=1 SV=1	sp|Q048Y7|RUVB_LACDB Holliday junction ATP-dependent DNA helicase RuvB OS=Lactobacillus delbrueckii subsp. bulgaricus (strain ATCC BAA-365) GN=ruvB PE=3 SV=1	Cytoplasmic Protein	4	90.2
Bacillus	Firmicutes	Lactobacillus delbrueckii	sp|Q8WVB6|CTF18_HUMAN Chromosome transmission fidelity protein 18 homolog OS=Homo sapiens GN=CHTF18 PE=1 SV=1	sp|Q1G941|RUVB_LACDA Holliday junction ATP-dependent DNA helicase RuvB OS=Lactobacillus delbrueckii subsp. bulgaricus (strain ATCC 11842 / DSM 20081 / JCM 1002 / NBRC 13953 / NCIMB 11778) GN=ruvB PE=3 SV=1	Cytoplasmic Protein	4	90.2
Bacillus	Firmicutes	Bacillus subtilis	sp|Q8WVB6|CTF18_HUMAN Chromosome transmission fidelity protein 18 homolog OS=Homo sapiens GN=CHTF18 PE=1 SV=1	sp|O32055|RUVB_BACSU Holliday junction ATP-dependent DNA helicase RuvB OS=Bacillus subtilis (strain 168) GN=ruvB PE=1 SV=2	Cytoplasmic Protein	4	90.2
Bacillus	Firmicutes	Lactobacillus acidophilus	sp|Q8WVB6|CTF18_HUMAN Chromosome transmission fidelity protein 18 homolog OS=Homo sapiens GN=CHTF18 PE=1 SV=1	sp|Q5FLX2|RUVB_LACAC Holliday junction ATP-dependent DNA helicase RuvB OS=Lactobacillus acidophilus (strain ATCC 700396 / NCK56 / N2 / NCFM) GN=ruvB PE=3 SV=1	Cytoplasmic Protein	4	90.2
Bacillus	Firmicutes	Lactobacillus salivarius	sp|Q8WVB6|CTF18_HUMAN Chromosome transmission fidelity protein 18 homolog OS=Homo sapiens GN=CHTF18 PE=1 SV=1	sp|Q1WT18|RUVB_LACS1 Holliday junction ATP-dependent DNA helicase RuvB OS=Lactobacillus salivarius (strain UCC118) GN=ruvB PE=3 SV=1	Cytoplasmic Protein	4	90.2
Bacillus	Firmicutes	Lactobacillus reuteri	sp|Q8WVB6|CTF18_HUMAN Chromosome transmission fidelity protein 18 homolog OS=Homo sapiens GN=CHTF18 PE=1 SV=1	sp|B2G6E8|RUVB_LACRJ Holliday junction ATP-dependent DNA helicase RuvB OS=Lactobacillus reuteri (strain JCM 1112) GN=ruvB PE=3 SV=1	Cytoplasmic Protein	1	53.1
Bacillus	Firmicutes	Lactobacillus reuteri	sp|Q8WVB6|CTF18_HUMAN Chromosome transmission fidelity protein 18 homolog OS=Homo sapiens GN=CHTF18 PE=1 SV=1	sp|A5VIX2|RUVB_LACRD Holliday junction ATP-dependent DNA helicase RuvB OS=Lactobacillus reuteri (strain DSM 20016) GN=ruvB PE=3 SV=1	Cytoplasmic Protein	4	90.2
Bacillus	Firmicutes	Bacillus licheniformis	sp|Q8WVB6|CTF18_HUMAN Chromosome transmission fidelity protein 18 homolog OS=Homo sapiens GN=CHTF18 PE=1 SV=1	sp|Q65GP6|RUVB_BACLD Holliday junction DNA helicase RuvB OS=Bacillus licheniformis (strain ATCC 14580 / DSM 13 / JCM 2505 / NBRC 12200 / NCIMB 9375 / NRRL NRS-1264 / Gibson 46) GN=ruvB PE=3 SV=1	Cytoplasmic Protein	4	90.2
Bacillus	Firmicutes	Lactobacillus casei	sp|Q8WVB6|CTF18_HUMAN Chromosome transmission fidelity protein 18 homolog OS=Homo sapiens GN=CHTF18 PE=1 SV=1	sp|B3WC56|RUVB_LACCB Holliday junction ATP-dependent DNA helicase RuvB OS=Lactobacillus casei (strain BL23) GN=ruvB PE=3 SV=1	Cytoplasmic Protein	4	90.2
Bacillus	Firmicutes	Lactobacillus casei	sp|Q8WVB6|CTF18_HUMAN Chromosome transmission fidelity protein 18 homolog OS=Homo sapiens GN=CHTF18 PE=1 SV=1	sp|Q03B17|RUVB_LACC3 Holliday junction ATP-dependent DNA helicase RuvB OS=Lactobacillus casei (strain ATCC 334) GN=ruvB PE=3 SV=1	Cytoplasmic Protein	4	90.2
Bacillus	Firmicutes	Lactobacillus helveticus	sp|Q8WVB6|CTF18_HUMAN Chromosome transmission fidelity protein 18 homolog OS=Homo sapiens GN=CHTF18 PE=1 SV=1	sp|A8YTI2|RUVB_LACH4 Holliday junction ATP-dependent DNA helicase RuvB OS=Lactobacillus helveticus (strain DPC 4571) GN=ruvB PE=3 SV=1	Cytoplasmic Protein	4	90.2
Bacillus	Firmicutes	Lactobacillus plantarum	sp|Q8WVB6|CTF18_HUMAN Chromosome transmission fidelity protein 18 homolog OS=Homo sapiens GN=CHTF18 PE=1 SV=1	sp|Q88V03|RUVB_LACPL Holliday junction ATP-dependent DNA helicase RuvB OS=Lactobacillus plantarum (strain ATCC BAA-793 / NCIMB 8826 / WCFS1) GN=ruvB PE=3 SV=2	Cytoplasmic Protein	4	90.2
Bacillus	Firmicutes	Lactobacillus brevis	sp|Q8WVB6|CTF18_HUMAN Chromosome transmission fidelity protein 18 homolog OS=Homo sapiens GN=CHTF18 PE=1 SV=1	sp|Q03R36|RUVB_LACBA Holliday junction ATP-dependent DNA helicase RuvB OS=Lactobacillus brevis (strain ATCC 367 / JCM 1170) GN=ruvB PE=3 SV=1	Cytoplasmic Protein	4	90.2
Bacillus	Firmicutes	Bacillus halodurans	sp|Q8WVB6|CTF18_HUMAN Chromosome transmission fidelity protein 18 homolog OS=Homo sapiens GN=CHTF18 PE=1 SV=1	sp|Q9KDI8|RUVB_BACHD Holliday junction ATP-dependent DNA helicase RuvB OS=Bacillus halodurans (strain ATCC BAA-125 / DSM 18197 / FERM 7344 / JCM 9153 / C-125) GN=ruvB PE=3 SV=2	Cytoplasmic Protein	4	90.2
Bacillus	Firmicutes	Lactobacillus reuteri	sp|Q9UJV9|DDX41_HUMAN Probable ATP-dependent RNA helicase DDX41 OS=Homo sapiens GN=DDX41 PE=1 SV=2	sp|Q9Z6C9|CSHA_LACRE ATP-dependent RNA helicase CshA OS=Lactobacillus reuteri GN=cshA PE=3 SV=1	Cytoplasmic Protein	1	53.1
Bacillus	Firmicutes	Bacillus licheniformis	sp|Q9UJV9|DDX41_HUMAN Probable ATP-dependent RNA helicase DDX41 OS=Homo sapiens GN=DDX41 PE=1 SV=2	sp|Q65N62|CSHA_BACLD DEAD-box ATP-dependent RNA helicase CshA OS=Bacillus licheniformis (strain ATCC 14580 / DSM 13 / JCM 2505 / NBRC 12200 / NCIMB 9375 / NRRL NRS-1264 / Gibson 46) GN=cshA PE=3 SV=1	Cytoplasmic Protein	2	68.1
Bacillus	Firmicutes	Bacillus subtilis	sp|Q9UJV9|DDX41_HUMAN Probable ATP-dependent RNA helicase DDX41 OS=Homo sapiens GN=DDX41 PE=1 SV=2	sp|P96614|CSHA_BACSU DEAD-box ATP-dependent RNA helicase CshA OS=Bacillus subtilis (strain 168) GN=cshA PE=1 SV=2	Cytoplasmic Protein	4	90.2
Bacillus	Firmicutes	Bacillus cereus	sp|Q9UJV9|DDX41_HUMAN Probable ATP-dependent RNA helicase DDX41 OS=Homo sapiens GN=DDX41 PE=1 SV=2	sp|Q73EU1|CSHA_BACC1 DEAD-box ATP-dependent RNA helicase CshA OS=Bacillus cereus (strain ATCC 10987 / NRS 248) GN=cshA PE=3 SV=1	Cytoplasmic Protein	4	90.2
Bacillus	Firmicutes	Bacillus thuringiensis	sp|Q9UJV9|DDX41_HUMAN Probable ATP-dependent RNA helicase DDX41 OS=Homo sapiens GN=DDX41 PE=1 SV=2	sp|Q6HPE6|CSHA_BACHK DEAD-box ATP-dependent RNA helicase CshA OS=Bacillus thuringiensis subsp. konkukian (strain 97-27) GN=cshA PE=3 SV=1	Cytoplasmic Protein	3	71.1
Bacillus	Firmicutes	Bacillus thuringiensis	sp|Q9UJV9|DDX41_HUMAN Probable ATP-dependent RNA helicase DDX41 OS=Homo sapiens GN=DDX41 PE=1 SV=2	sp|A0R8U6|CSHA_BACAH DEAD-box ATP-dependent RNA helicase CshA OS=Bacillus thuringiensis (strain Al Hakam) GN=cshA PE=3 SV=1	Cytoplasmic Protein	4	90.2
Bacillus	Firmicutes	Bacillus anthracis	sp|Q9UJV9|DDX41_HUMAN Probable ATP-dependent RNA helicase DDX41 OS=Homo sapiens GN=DDX41 PE=1 SV=2	sp|Q81VG0|CSHA_BACAN DEAD-box ATP-dependent RNA helicase CshA OS=Bacillus anthracis GN=cshA PE=3 SV=1	Cytoplasmic Protein	4	90.2
Bacillus	Firmicutes	Bacillus cereus	sp|Q9UJV9|DDX41_HUMAN Probable ATP-dependent RNA helicase DDX41 OS=Homo sapiens GN=DDX41 PE=1 SV=2	sp|Q63GX5|CSHA_BACCZ DEAD-box ATP-dependent RNA helicase CshA OS=Bacillus cereus (strain ZK / E33L) GN=cshA PE=3 SV=1	Cytoplasmic Protein	4	90.2
Bacillus	Firmicutes	Bacillus cereus	sp|Q9UJV9|DDX41_HUMAN Probable ATP-dependent RNA helicase DDX41 OS=Homo sapiens GN=DDX41 PE=1 SV=2	sp|Q81IT9|CSHA_BACCR DEAD-box ATP-dependent RNA helicase CshA OS=Bacillus cereus (strain ATCC 14579 / DSM 31 / JCM 2152 / NBRC 15305 / NCIMB 9373 / NRRL B-3711) GN=cshA PE=2 SV=2	Cytoplasmic Protein	4	90.2
Bacillus	Firmicutes	Bacillus licheniformis	sp|Q8WVC6|DCAKD_HUMAN Dephospho-CoA kinase domain-containing protein OS=Homo sapiens GN=DCAKD PE=1 SV=1	sp|Q65G95|COAE_BACLD Dephospho-CoA kinase OS=Bacillus licheniformis (strain ATCC 14580 / DSM 13 / JCM 2505 / NBRC 12200 / NCIMB 9375 / NRRL NRS-1264 / Gibson 46) GN=coaE PE=3 SV=1	Cytoplasmic Protein	4	90.2
Bacillus	Firmicutes	Bacillus anthracis	sp|Q8WVC6|DCAKD_HUMAN Dephospho-CoA kinase domain-containing protein OS=Homo sapiens GN=DCAKD PE=1 SV=1	sp|Q6HSG2|COAE_BACAN Dephospho-CoA kinase OS=Bacillus anthracis GN=coaE PE=3 SV=1	Cytoplasmic Protein	4	90.2
Bacillus	Firmicutes	Bacillus cereus	sp|Q8WVC6|DCAKD_HUMAN Dephospho-CoA kinase domain-containing protein OS=Homo sapiens GN=DCAKD PE=1 SV=1	sp|Q72ZF3|COAE_BACC1 Dephospho-CoA kinase OS=Bacillus cereus (strain ATCC 10987 / NRS 248) GN=coaE PE=3 SV=1	Cytoplasmic Protein	1	53.1
Bacillus	Firmicutes	Bacillus thuringiensis	sp|Q8WVC6|DCAKD_HUMAN Dephospho-CoA kinase domain-containing protein OS=Homo sapiens GN=DCAKD PE=1 SV=1	sp|Q6HCU7|COAE_BACHK Dephospho-CoA kinase OS=Bacillus thuringiensis subsp. konkukian (strain 97-27) GN=coaE PE=3 SV=1	Cytoplasmic Protein	4	90.2
Bacillus	Firmicutes	Bacillus subtilis	sp|Q8WVC6|DCAKD_HUMAN Dephospho-CoA kinase domain-containing protein OS=Homo sapiens GN=DCAKD PE=1 SV=1	sp|O34932|COAE_BACSU Dephospho-CoA kinase OS=Bacillus subtilis (strain 168) GN=coaE PE=3 SV=1	Cytoplasmic Protein	4	90.2
Bacillus	Firmicutes	Bacillus cereus	sp|Q8WVC6|DCAKD_HUMAN Dephospho-CoA kinase domain-containing protein OS=Homo sapiens GN=DCAKD PE=1 SV=1	sp|Q817G7|COAE_BACCR Dephospho-CoA kinase OS=Bacillus cereus (strain ATCC 14579 / DSM 31 / JCM 2152 / NBRC 15305 / NCIMB 9373 / NRRL B-3711) GN=coaE PE=3 SV=1	Cytoplasmic Protein	4	90.2
Bacillus	Firmicutes	Bacillus cereus	sp|Q8WVC6|DCAKD_HUMAN Dephospho-CoA kinase domain-containing protein OS=Homo sapiens GN=DCAKD PE=1 SV=1	sp|Q633L3|COAE_BACCZ Dephospho-CoA kinase OS=Bacillus cereus (strain ZK / E33L) GN=coaE PE=3 SV=1	Cytoplasmic Protein	1	53.1
Bacillus	Firmicutes	Bacillus halodurans	sp|Q8WVC6|DCAKD_HUMAN Dephospho-CoA kinase domain-containing protein OS=Homo sapiens GN=DCAKD PE=1 SV=1	sp|Q9K857|COAE_BACHD Dephospho-CoA kinase OS=Bacillus halodurans (strain ATCC BAA-125 / DSM 18197 / FERM 7344 / JCM 9153 / C-125) GN=coaE PE=3 SV=1	Cytoplasmic Protein	1	53.1
Bacillus	Firmicutes	Bacillus clausii	sp|Q8WVC6|DCAKD_HUMAN Dephospho-CoA kinase domain-containing protein OS=Homo sapiens GN=DCAKD PE=1 SV=1	sp|Q5WEG9|COAE_BACSK Dephospho-CoA kinase OS=Bacillus clausii (strain KSM-K16) GN=coaE PE=3 SV=1	Cytoplasmic Protein	4	90.2
Bacillus	Firmicutes	Lactobacillus johnsonii	sp|Q8WVC6|DCAKD_HUMAN Dephospho-CoA kinase domain-containing protein OS=Homo sapiens GN=DCAKD PE=1 SV=1	sp|Q74IB6|COAE_LACJO Dephospho-CoA kinase OS=Lactobacillus johnsonii (strain CNCM I-12250 / La1 / NCC 533) GN=coaE PE=3 SV=1	Cytoplasmic Protein	1	53.1
Bacillus	Firmicutes	Bacillus pumilus	sp|P06132|DCUP_HUMAN Uroporphyrinogen decarboxylase OS=Homo sapiens GN=UROD PE=1 SV=2	sp|A8FBM5|DCUP_BACP2 Uroporphyrinogen decarboxylase OS=Bacillus pumilus (strain SAFR-032) GN=hemE PE=3 SV=1	Cytoplasmic Protein	4	90.2
Bacillus	Firmicutes	Bacillus subtilis	sp|Q13206|DDX10_HUMAN Probable ATP-dependent RNA helicase DDX10 OS=Homo sapiens GN=DDX10 PE=1 SV=2	sp|O34750|YFML_BACSU Probable ATP-dependent RNA helicase YfmL OS=Bacillus subtilis (strain 168) GN=yfmL PE=1 SV=1	Cytoplasmic Protein	1	53.1
Bacillus	Firmicutes	Bacillus cereus	sp|Q92841|DDX17_HUMAN Probable ATP-dependent RNA helicase DDX17 OS=Homo sapiens GN=DDX17 PE=1 SV=2	sp|Q818H2|CSHB_BACCR DEAD-box ATP-dependent RNA helicase CshB OS=Bacillus cereus (strain ATCC 14579 / DSM 31 / JCM 2152 / NBRC 15305 / NCIMB 9373 / NRRL B-3711) GN=cshB PE=2 SV=1	Cytoplasmic Protein	4	90.2
Bacillus	Firmicutes	Bacillus cereus	sp|Q92841|DDX17_HUMAN Probable ATP-dependent RNA helicase DDX17 OS=Homo sapiens GN=DDX17 PE=1 SV=2	sp|Q81E85|CSHC_BACCR DEAD-box ATP-dependent RNA helicase CshC OS=Bacillus cereus (strain ATCC 14579 / DSM 31 / JCM 2152 / NBRC 15305 / NCIMB 9373 / NRRL B-3711) GN=cshC PE=2 SV=1	Cytoplasmic Protein	4	90.2
Bacillus	Firmicutes	Bacillus cereus	sp|Q9GZR7|DDX24_HUMAN ATP-dependent RNA helicase DDX24 OS=Homo sapiens GN=DDX24 PE=1 SV=1	sp|Q814I2|DBPA_BACCR ATP-dependent RNA helicase DbpA OS=Bacillus cereus (strain ATCC 14579 / DSM 31 / JCM 2152 / NBRC 15305 / NCIMB 9373 / NRRL B-3711) GN=dbpA PE=2 SV=1	Cytoplasmic Protein	4	90.2
Bacillus	Firmicutes	Bacillus subtilis	sp|Q9GZR7|DDX24_HUMAN ATP-dependent RNA helicase DDX24 OS=Homo sapiens GN=DDX24 PE=1 SV=1	sp|P42305|DBPA_BACSU ATP-dependent RNA helicase DbpA OS=Bacillus subtilis (strain 168) GN=dbpA PE=1 SV=2	Cytoplasmic Protein	4	90.2
Bacillus	Firmicutes	Bacillus cereus	sp|Q9GZR7|DDX24_HUMAN ATP-dependent RNA helicase DDX24 OS=Homo sapiens GN=DDX24 PE=1 SV=1	sp|Q81DF9|CSHE_BACCR DEAD-box ATP-dependent RNA helicase CshE OS=Bacillus cereus (strain ATCC 14579 / DSM 31 / JCM 2152 / NBRC 15305 / NCIMB 9373 / NRRL B-3711) GN=cshE PE=2 SV=1	Cytoplasmic Protein	2	68.1
Bacillus	Firmicutes	Bacillus subtilis	sp|Q16698|DECR_HUMAN 2,4-dienoyl-CoA reductase, mitochondrial OS=Homo sapiens GN=DECR1 PE=1 SV=1	sp|O34717|FADH_BACSU Probable 2,4-dienoyl-CoA reductase OS=Bacillus subtilis (strain 168) GN=fadH PE=2 SV=1	Cytoplasmic Protein	4	90.2
Bacillus	Firmicutes	Bacillus subtilis	sp|Q92506|DHB8_HUMAN Estradiol 17-beta-dehydrogenase 8 OS=Homo sapiens GN=HSD17B8 PE=1 SV=2	sp|P80873|GS39_BACSU General stress protein 39 OS=Bacillus subtilis (strain 168) GN=ydaD PE=1 SV=3	Cytoplasmic Protein	1	53.1
Bacillus	Firmicutes	Bacillus subtilis	sp|Q92506|DHB8_HUMAN Estradiol 17-beta-dehydrogenase 8 OS=Homo sapiens GN=HSD17B8 PE=1 SV=2	sp|P40397|YHXC_BACSU Uncharacterized oxidoreductase YhxC OS=Bacillus subtilis (strain 168) GN=yhxC PE=3 SV=2	Cytoplasmic Protein	4	90.2
Bacillus	Firmicutes	Bacillus subtilis	sp|P49448|DHE4_HUMAN Glutamate dehydrogenase 2, mitochondrial OS=Homo sapiens GN=GLUD2 PE=1 SV=2	sp|P50735|GUDB_BACSU Cryptic catabolic NAD-specific glutamate dehydrogenase GudB OS=Bacillus subtilis (strain 168) GN=gudB PE=1 SV=2	Cytoplasmic Protein	5	98.1
Bacillus	Firmicutes	Bacillus subtilis	sp|P49448|DHE4_HUMAN Glutamate dehydrogenase 2, mitochondrial OS=Homo sapiens GN=GLUD2 PE=1 SV=2	sp|P39633|DHE2_BACSU Catabolic NAD-specific glutamate dehydrogenase RocG OS=Bacillus subtilis (strain 168) GN=rocG PE=1 SV=3	Cytoplasmic Protein	4	90.2
Bacillus	Firmicutes	Bacillus subtilis	sp|Q8N8A6|DDX51_HUMAN ATP-dependent RNA helicase DDX51 OS=Homo sapiens GN=DDX51 PE=1 SV=3	sp|P54475|CSHB_BACSU DEAD-box ATP-dependent RNA helicase CshB OS=Bacillus subtilis (strain 168) GN=cshB PE=1 SV=1	Cytoplasmic Protein	4	90.2
Bacillus	Firmicutes	Bacillus subtilis	sp|Q8IYB7|DI3L2_HUMAN DIS3-like exonuclease 2 OS=Homo sapiens GN=DIS3L2 PE=1 SV=4	sp|O32231|RNR_BACSU Ribonuclease R OS=Bacillus subtilis (strain 168) GN=rnr PE=2 SV=1	Cytoplasmic Protein	1	53.1
Bacillus	Firmicutes	Bacillus subtilis	sp|P56937|DHB7_HUMAN 3-keto-steroid reductase OS=Homo sapiens GN=HSD17B7 PE=1 SV=1	sp|O32291|YXNA_BACSU Uncharacterized oxidoreductase YxnA OS=Bacillus subtilis (strain 168) GN=yxnA PE=3 SV=2	Cytoplasmic Protein	4	90.2
Bacillus	Firmicutes	Bacillus cytotoxicus	sp|Q96EY1|DNJA3_HUMAN DnaJ homolog subfamily A member 3, mitochondrial OS=Homo sapiens GN=DNAJA3 PE=1 SV=2	sp|A7GT07|DNAJ_BACCN Chaperone protein DnaJ OS=Bacillus cytotoxicus (strain DSM 22905 / CIP 110041 / 391-98 / NVH 391-98) GN=dnaJ PE=3 SV=1	Cytoplasmic Protein	2	68.1
Bacillus	Firmicutes	Lactobacillus sakei	sp|Q96EY1|DNJA3_HUMAN DnaJ homolog subfamily A member 3, mitochondrial OS=Homo sapiens GN=DNAJA3 PE=1 SV=2	sp|O87778|DNAJ_LACSK Chaperone protein DnaJ OS=Lactobacillus sakei GN=dnaJ PE=2 SV=1	Cytoplasmic Protein	1	53.1
Bacillus	Firmicutes	Lactobacillus sakei	sp|Q96EY1|DNJA3_HUMAN DnaJ homolog subfamily A member 3, mitochondrial OS=Homo sapiens GN=DNAJA3 PE=1 SV=2	sp|Q38W94|DNAJ_LACSS Chaperone protein DnaJ OS=Lactobacillus sakei subsp. sakei (strain 23K) GN=dnaJ PE=3 SV=1	Cytoplasmic Protein	1	53.1
Bacillus	Firmicutes	Bacillus methylotrophicus	sp|O75953|DNJB5_HUMAN DnaJ homolog subfamily B member 5 OS=Homo sapiens GN=DNAJB5 PE=1 SV=1	sp|A7Z6W0|DNAJ_BACMF Chaperone protein DnaJ OS=Bacillus methylotrophicus (strain DSM 23117 / BGSC 10A6 / FZB42) GN=dnaJ PE=3 SV=1	Cytoplasmic Protein	4	90.2
Bacillus	Firmicutes	Bacillus pumilus	sp|O75953|DNJB5_HUMAN DnaJ homolog subfamily B member 5 OS=Homo sapiens GN=DNAJB5 PE=1 SV=1	sp|A8FFD1|DNAJ_BACP2 Chaperone protein DnaJ OS=Bacillus pumilus (strain SAFR-032) GN=dnaJ PE=3 SV=1	Cytoplasmic Protein	1	53.1
Bacillus	Firmicutes	Bacillus licheniformis	sp|O75953|DNJB5_HUMAN DnaJ homolog subfamily B member 5 OS=Homo sapiens GN=DNAJB5 PE=1 SV=1	sp|Q65H55|DNAJ_BACLD Chaperone protein DnaJ OS=Bacillus licheniformis (strain ATCC 14580 / DSM 13 / JCM 2505 / NBRC 12200 / NCIMB 9375 / NRRL NRS-1264 / Gibson 46) GN=dnaJ PE=3 SV=1	Cytoplasmic Protein	4	90.2
Bacillus	Firmicutes	Bacillus subtilis	sp|O75953|DNJB5_HUMAN DnaJ homolog subfamily B member 5 OS=Homo sapiens GN=DNAJB5 PE=1 SV=1	sp|P17631|DNAJ_BACSU Chaperone protein DnaJ OS=Bacillus subtilis (strain 168) GN=dnaJ PE=2 SV=3	Cytoplasmic Protein	4	90.2
Bacillus	Firmicutes	Lactobacillus plantarum	sp|O75953|DNJB5_HUMAN DnaJ homolog subfamily B member 5 OS=Homo sapiens GN=DNAJB5 PE=1 SV=1	sp|Q88VM1|DNAJ_LACPL Chaperone protein DnaJ OS=Lactobacillus plantarum (strain ATCC BAA-793 / NCIMB 8826 / WCFS1) GN=dnaJ PE=3 SV=1	Cytoplasmic Protein	1	53.1
Bacillus	Firmicutes	Lactobacillus brevis	sp|O75953|DNJB5_HUMAN DnaJ homolog subfamily B member 5 OS=Homo sapiens GN=DNAJB5 PE=1 SV=1	sp|Q03QU2|DNAJ_LACBA Chaperone protein DnaJ OS=Lactobacillus brevis (strain ATCC 367 / JCM 1170) GN=dnaJ PE=3 SV=1	Cytoplasmic Protein	4	90.2
Bacillus	Firmicutes	Bacillus subtilis	sp|Q96LJ7|DHRS1_HUMAN Dehydrogenase/reductase SDR family member 1 OS=Homo sapiens GN=DHRS1 PE=1 SV=1	sp|P51831|FABG_BACSU 3-oxoacyl-[acyl-carrier-protein] reductase FabG OS=Bacillus subtilis (strain 168) GN=fabG PE=3 SV=3	Cytoplasmic Protein	1	53.1
Bacillus	Firmicutes	Bacillus halodurans	sp|Q96HY7|DHTK1_HUMAN Probable 2-oxoglutarate dehydrogenase E1 component DHKTD1, mitochondrial OS=Homo sapiens GN=DHTKD1 PE=1 SV=2	sp|Q9KAT1|ODO1_BACHD 2-oxoglutarate dehydrogenase E1 component OS=Bacillus halodurans (strain ATCC BAA-125 / DSM 18197 / FERM 7344 / JCM 9153 / C-125) GN=odhA PE=3 SV=1	Cytoplasmic Protein	4	90.2
Bacillus	Firmicutes	Bacillus clausii	sp|Q96HY7|DHTK1_HUMAN Probable 2-oxoglutarate dehydrogenase E1 component DHKTD1, mitochondrial OS=Homo sapiens GN=DHTKD1 PE=1 SV=2	sp|Q5WG56|ODO1_BACSK 2-oxoglutarate dehydrogenase E1 component OS=Bacillus clausii (strain KSM-K16) GN=odhA PE=3 SV=1	Cytoplasmic Protein	4	90.2
Bacillus	Firmicutes	Bacillus subtilis	sp|Q13268|DHRS2_HUMAN Dehydrogenase/reductase SDR family member 2, mitochondrial OS=Homo sapiens GN=DHRS2 PE=1 SV=4	sp|O32229|YVAG_BACSU Uncharacterized oxidoreductase YvaG OS=Bacillus subtilis (strain 168) GN=yvaG PE=3 SV=1	Cytoplasmic Protein	4	90.2
Bacillus	Firmicutes	Bacillus subtilis	sp|P09622|DLDH_HUMAN Dihydrolipoyl dehydrogenase, mitochondrial OS=Homo sapiens GN=DLD PE=1 SV=2	sp|P21880|DLDH1_BACSU Dihydrolipoyl dehydrogenase OS=Bacillus subtilis (strain 168) GN=pdhD PE=3 SV=1	Cytoplasmic Protein	4	90.2
Bacillus	Firmicutes	Bacillus subtilis	sp|P09622|DLDH_HUMAN Dihydrolipoyl dehydrogenase, mitochondrial OS=Homo sapiens GN=DLD PE=1 SV=2	sp|P54533|DLDH2_BACSU Dihydrolipoyl dehydrogenase OS=Bacillus subtilis (strain 168) GN=bfmBC PE=3 SV=1	Cytoplasmic Protein	1	53.1
Bacillus	Firmicutes	Lactobacillus reuteri	sp|P25685|DNJB1_HUMAN DnaJ homolog subfamily B member 1 OS=Homo sapiens GN=DNAJB1 PE=1 SV=4	sp|B2G6W4|DNAJ_LACRJ Chaperone protein DnaJ OS=Lactobacillus reuteri (strain JCM 1112) GN=dnaJ PE=3 SV=1	Cytoplasmic Protein	4	90.2
Bacillus	Firmicutes	Lactobacillus reuteri	sp|P25685|DNJB1_HUMAN DnaJ homolog subfamily B member 1 OS=Homo sapiens GN=DNAJB1 PE=1 SV=4	sp|A5VJE8|DNAJ_LACRD Chaperone protein DnaJ OS=Lactobacillus reuteri (strain DSM 20016) GN=dnaJ PE=3 SV=1	Cytoplasmic Protein	1	53.1
Bacillus	Firmicutes	Lactobacillus helveticus	sp|Q12882|DPYD_HUMAN Dihydropyrimidine dehydrogenase [NADP(+)] OS=Homo sapiens GN=DPYD PE=1 SV=2	sp|A8YVZ9|PYRDA_LACH4 Dihydroorotate dehydrogenase A (fumarate) OS=Lactobacillus helveticus (strain DPC 4571) GN=pyrD PE=3 SV=1	Cytoplasmic Protein	1	53.1
Bacillus	Firmicutes	Lactobacillus acidophilus	sp|Q12882|DPYD_HUMAN Dihydropyrimidine dehydrogenase [NADP(+)] OS=Homo sapiens GN=DPYD PE=1 SV=2	sp|Q5FJB5|PYRDA_LACAC Dihydroorotate dehydrogenase A (fumarate) OS=Lactobacillus acidophilus (strain ATCC 700396 / NCK56 / N2 / NCFM) GN=pyrD PE=3 SV=1	Cytoplasmic Protein	4	90.2
Bacillus	Firmicutes	Lactobacillus delbrueckii	sp|Q12882|DPYD_HUMAN Dihydropyrimidine dehydrogenase [NADP(+)] OS=Homo sapiens GN=DPYD PE=1 SV=2	sp|Q047M3|PYRDA_LACDB Dihydroorotate dehydrogenase A (fumarate) OS=Lactobacillus delbrueckii subsp. bulgaricus (strain ATCC BAA-365) GN=pyrD PE=3 SV=1	Cytoplasmic Protein	1	53.1
Bacillus	Firmicutes	Lactobacillus delbrueckii	sp|Q12882|DPYD_HUMAN Dihydropyrimidine dehydrogenase [NADP(+)] OS=Homo sapiens GN=DPYD PE=1 SV=2	sp|Q1G864|PYRDA_LACDA Dihydroorotate dehydrogenase A (fumarate) OS=Lactobacillus delbrueckii subsp. bulgaricus (strain ATCC 11842 / DSM 20081 / JCM 1002 / NBRC 13953 / NCIMB 11778) GN=pyrD PE=3 SV=1	Cytoplasmic Protein	1	53.1
Bacillus	Firmicutes	Lactobacillus casei	sp|Q12882|DPYD_HUMAN Dihydropyrimidine dehydrogenase [NADP(+)] OS=Homo sapiens GN=DPYD PE=1 SV=2	sp|Q038Z3|PYRDA_LACC3 Dihydroorotate dehydrogenase A (fumarate) OS=Lactobacillus casei (strain ATCC 334) GN=pyrD PE=3 SV=1	Cytoplasmic Protein	4	90.2
Bacillus	Firmicutes	Lactobacillus johnsonii	sp|Q12882|DPYD_HUMAN Dihydropyrimidine dehydrogenase [NADP(+)] OS=Homo sapiens GN=DPYD PE=1 SV=2	sp|Q74J29|PYRDA_LACJO Dihydroorotate dehydrogenase A (fumarate) OS=Lactobacillus johnsonii (strain CNCM I-12250 / La1 / NCC 533) GN=pyrD PE=3 SV=1	Cytoplasmic Protein	1	53.1
Bacillus	Firmicutes	Lactobacillus plantarum	sp|Q12882|DPYD_HUMAN Dihydropyrimidine dehydrogenase [NADP(+)] OS=Homo sapiens GN=DPYD PE=1 SV=2	sp|P77887|PYRDA_LACPL Dihydroorotate dehydrogenase A (fumarate) OS=Lactobacillus plantarum (strain ATCC BAA-793 / NCIMB 8826 / WCFS1) GN=pyrD PE=3 SV=2	Cytoplasmic Protein	4	90.2
Bacillus	Firmicutes	Lactobacillus johnsonii	sp|Q99615|DNJC7_HUMAN DnaJ homolog subfamily C member 7 OS=Homo sapiens GN=DNAJC7 PE=1 SV=2	sp|Q74IT7|DNAJ_LACJO Chaperone protein DnaJ OS=Lactobacillus johnsonii (strain CNCM I-12250 / La1 / NCC 533) GN=dnaJ PE=3 SV=1	Cytoplasmic Protein	1	53.1
Bacillus	Firmicutes	Lactobacillus gasseri	sp|Q99615|DNJC7_HUMAN DnaJ homolog subfamily C member 7 OS=Homo sapiens GN=DNAJC7 PE=1 SV=2	sp|Q044A8|DNAJ_LACGA Chaperone protein DnaJ OS=Lactobacillus gasseri (strain ATCC 33323 / DSM 20243 / JCM 1131 / NCIMB 11718 / AM63) GN=dnaJ PE=3 SV=1	Periplasmic Protein	1	53.1
Bacillus	Firmicutes	Lactobacillus delbrueckii	sp|Q9H819|DJC18_HUMAN DnaJ homolog subfamily C member 18 OS=Homo sapiens GN=DNAJC18 PE=2 SV=1	sp|Q1G9R3|DNAJ_LACDA Chaperone protein DnaJ OS=Lactobacillus delbrueckii subsp. bulgaricus (strain ATCC 11842 / DSM 20081 / JCM 1002 / NBRC 13953 / NCIMB 11778) GN=dnaJ PE=3 SV=1	Cytoplasmic Protein	4	90.2
Bacillus	Firmicutes	Lactobacillus delbrueckii	sp|Q9H819|DJC18_HUMAN DnaJ homolog subfamily C member 18 OS=Homo sapiens GN=DNAJC18 PE=2 SV=1	sp|Q049W7|DNAJ_LACDB Chaperone protein DnaJ OS=Lactobacillus delbrueckii subsp. bulgaricus (strain ATCC BAA-365) GN=dnaJ PE=3 SV=1	Cytoplasmic Protein	1	53.1
Bacillus	Firmicutes	Lactobacillus delbrueckii	sp|Q9BPU6|DPYL5_HUMAN Dihydropyrimidinase-related protein 5 OS=Homo sapiens GN=DPYSL5 PE=1 SV=1	sp|Q1G867|PYRC_LACDA Dihydroorotase OS=Lactobacillus delbrueckii subsp. bulgaricus (strain ATCC 11842 / DSM 20081 / JCM 1002 / NBRC 13953 / NCIMB 11778) GN=pyrC PE=3 SV=1	Cytoplasmic Protein	4	90.2
Bacillus	Firmicutes	Lactobacillus helveticus	sp|Q9BPU6|DPYL5_HUMAN Dihydropyrimidinase-related protein 5 OS=Homo sapiens GN=DPYSL5 PE=1 SV=1	sp|A8YVZ5|PYRC_LACH4 Dihydroorotase OS=Lactobacillus helveticus (strain DPC 4571) GN=pyrC PE=3 SV=1	Cytoplasmic Protein	4	90.2
Bacillus	Firmicutes	Lactobacillus delbrueckii	sp|Q9BPU6|DPYL5_HUMAN Dihydropyrimidinase-related protein 5 OS=Homo sapiens GN=DPYSL5 PE=1 SV=1	sp|Q047M6|PYRC_LACDB Dihydroorotase OS=Lactobacillus delbrueckii subsp. bulgaricus (strain ATCC BAA-365) GN=pyrC PE=3 SV=1	Cytoplasmic Protein	4	90.2
Bacillus	Firmicutes	Bacillus halodurans	sp|Q9Y295|DRG1_HUMAN Developmentally-regulated GTP-binding protein 1 OS=Homo sapiens GN=DRG1 PE=1 SV=1	sp|Q9KDK0|OBG_BACHD GTPase Obg OS=Bacillus halodurans (strain ATCC BAA-125 / DSM 18197 / FERM 7344 / JCM 9153 / C-125) GN=obg PE=3 SV=1	Cytoplasmic Protein	4	90.2
Bacillus	Firmicutes	Bacillus licheniformis	sp|Q9Y295|DRG1_HUMAN Developmentally-regulated GTP-binding protein 1 OS=Homo sapiens GN=DRG1 PE=1 SV=1	sp|Q65GM7|OBG_BACLD GTPase Obg OS=Bacillus licheniformis (strain ATCC 14580 / DSM 13 / JCM 2505 / NBRC 12200 / NCIMB 9375 / NRRL NRS-1264 / Gibson 46) GN=obg PE=3 SV=1	Cytoplasmic Protein	4	90.2
Bacillus	Firmicutes	Bacillus pumilus	sp|Q9Y295|DRG1_HUMAN Developmentally-regulated GTP-binding protein 1 OS=Homo sapiens GN=DRG1 PE=1 SV=1	sp|A8FFS8|OBG_BACP2 GTPase Obg OS=Bacillus pumilus (strain SAFR-032) GN=obg PE=3 SV=1	Cytoplasmic Protein	1	53.1
Bacillus	Firmicutes	Bacillus clausii	sp|Q9Y295|DRG1_HUMAN Developmentally-regulated GTP-binding protein 1 OS=Homo sapiens GN=DRG1 PE=1 SV=1	sp|Q5WHS8|OBG_BACSK GTPase Obg OS=Bacillus clausii (strain KSM-K16) GN=obg PE=3 SV=1	Cytoplasmic Protein	4	90.2
Bacillus	Firmicutes	Lactobacillus sakei	sp|Q9Y295|DRG1_HUMAN Developmentally-regulated GTP-binding protein 1 OS=Homo sapiens GN=DRG1 PE=1 SV=1	sp|Q38WT4|OBG_LACSS GTPase Obg OS=Lactobacillus sakei subsp. sakei (strain 23K) GN=obg PE=3 SV=1	Cytoplasmic Protein	4	90.2
Bacillus	Firmicutes	Bacillus methylotrophicus	sp|Q9Y295|DRG1_HUMAN Developmentally-regulated GTP-binding protein 1 OS=Homo sapiens GN=DRG1 PE=1 SV=1	sp|A7Z781|OBG_BACMF GTPase Obg OS=Bacillus methylotrophicus (strain DSM 23117 / BGSC 10A6 / FZB42) GN=obg PE=3 SV=1	Cytoplasmic Protein	4	90.2
Bacillus	Firmicutes	Bacillus weihenstephanensis	sp|Q9Y295|DRG1_HUMAN Developmentally-regulated GTP-binding protein 1 OS=Homo sapiens GN=DRG1 PE=1 SV=1	sp|A9VIR5|OBG_BACWK GTPase Obg OS=Bacillus weihenstephanensis (strain KBAB4) GN=obg PE=3 SV=1	Cytoplasmic Protein	4	90.2
Bacillus	Firmicutes	Bacillus cereus	sp|Q9Y295|DRG1_HUMAN Developmentally-regulated GTP-binding protein 1 OS=Homo sapiens GN=DRG1 PE=1 SV=1	sp|B7IIV2|OBG_BACC2 GTPase Obg OS=Bacillus cereus (strain G9842) GN=obg PE=3 SV=1	Cytoplasmic Protein	4	90.2
Bacillus	Firmicutes	Bacillus subtilis	sp|Q9Y295|DRG1_HUMAN Developmentally-regulated GTP-binding protein 1 OS=Homo sapiens GN=DRG1 PE=1 SV=1	sp|P20964|OBG_BACSU GTPase Obg OS=Bacillus subtilis (strain 168) GN=obg PE=1 SV=1	Cytoplasmic Protein	1	53.1
Bacillus	Firmicutes	Bacillus cereus	sp|Q9Y295|DRG1_HUMAN Developmentally-regulated GTP-binding protein 1 OS=Homo sapiens GN=DRG1 PE=1 SV=1	sp|Q72ZY5|OBG_BACC1 GTPase Obg OS=Bacillus cereus (strain ATCC 10987 / NRS 248) GN=obg PE=3 SV=1	Cytoplasmic Protein	4	90.2
Bacillus	Firmicutes	Bacillus thuringiensis	sp|Q9Y295|DRG1_HUMAN Developmentally-regulated GTP-binding protein 1 OS=Homo sapiens GN=DRG1 PE=1 SV=1	sp|Q6HD85|OBG_BACHK GTPase Obg OS=Bacillus thuringiensis subsp. konkukian (strain 97-27) GN=obg PE=3 SV=1	Cytoplasmic Protein	4	90.2
Bacillus	Firmicutes	Bacillus cereus	sp|Q9Y295|DRG1_HUMAN Developmentally-regulated GTP-binding protein 1 OS=Homo sapiens GN=DRG1 PE=1 SV=1	sp|Q634A3|OBG_BACCZ GTPase Obg OS=Bacillus cereus (strain ZK / E33L) GN=obg PE=3 SV=1	Cytoplasmic Protein	4	90.2
Bacillus	Firmicutes	Bacillus cereus	sp|Q9Y295|DRG1_HUMAN Developmentally-regulated GTP-binding protein 1 OS=Homo sapiens GN=DRG1 PE=1 SV=1	sp|C1ETN7|OBG_BACC3 GTPase Obg OS=Bacillus cereus (strain 03BB102) GN=obg PE=3 SV=1	Cytoplasmic Protein	4	90.2
Bacillus	Firmicutes	Bacillus thuringiensis	sp|Q9Y295|DRG1_HUMAN Developmentally-regulated GTP-binding protein 1 OS=Homo sapiens GN=DRG1 PE=1 SV=1	sp|A0RJ47|OBG_BACAH GTPase Obg OS=Bacillus thuringiensis (strain Al Hakam) GN=obg PE=3 SV=1	Cytoplasmic Protein	4	90.2
Bacillus	Firmicutes	Bacillus cereus	sp|Q9Y295|DRG1_HUMAN Developmentally-regulated GTP-binding protein 1 OS=Homo sapiens GN=DRG1 PE=1 SV=1	sp|B7HQJ8|OBG_BACC7 GTPase Obg OS=Bacillus cereus (strain AH187) GN=obg PE=3 SV=1	Cytoplasmic Protein	4	90.2
Bacillus	Firmicutes	Lactobacillus reuteri	sp|Q9Y295|DRG1_HUMAN Developmentally-regulated GTP-binding protein 1 OS=Homo sapiens GN=DRG1 PE=1 SV=1	sp|B2G6R9|OBG_LACRJ GTPase Obg OS=Lactobacillus reuteri (strain JCM 1112) GN=obg PE=3 SV=1	Cytoplasmic Protein	4	90.2
Bacillus	Firmicutes	Lactobacillus reuteri	sp|Q9Y295|DRG1_HUMAN Developmentally-regulated GTP-binding protein 1 OS=Homo sapiens GN=DRG1 PE=1 SV=1	sp|A5VJ99|OBG_LACRD GTPase Obg OS=Lactobacillus reuteri (strain DSM 20016) GN=obg PE=3 SV=1	Cytoplasmic Protein	1	53.1
Bacillus	Firmicutes	Bacillus cereus	sp|Q9Y295|DRG1_HUMAN Developmentally-regulated GTP-binding protein 1 OS=Homo sapiens GN=DRG1 PE=1 SV=1	sp|Q817U6|OBG_BACCR GTPase Obg OS=Bacillus cereus (strain ATCC 14579 / DSM 31 / JCM 2152 / NBRC 15305 / NCIMB 9373 / NRRL B-3711) GN=obg PE=3 SV=1	Cytoplasmic Protein	1	53.1
Bacillus	Firmicutes	Bacillus cereus	sp|Q9Y295|DRG1_HUMAN Developmentally-regulated GTP-binding protein 1 OS=Homo sapiens GN=DRG1 PE=1 SV=1	sp|B9IZ16|OBG_BACCQ GTPase Obg OS=Bacillus cereus (strain Q1) GN=obg PE=3 SV=1	Cytoplasmic Protein	4	90.2
Bacillus	Firmicutes	Bacillus cereus	sp|Q9Y295|DRG1_HUMAN Developmentally-regulated GTP-binding protein 1 OS=Homo sapiens GN=DRG1 PE=1 SV=1	sp|B7JQ26|OBG_BACC0 GTPase Obg OS=Bacillus cereus (strain AH820) GN=obg PE=3 SV=1	Cytoplasmic Protein	4	90.2
Bacillus	Firmicutes	Bacillus anthracis	sp|Q9Y295|DRG1_HUMAN Developmentally-regulated GTP-binding protein 1 OS=Homo sapiens GN=DRG1 PE=1 SV=1	sp|Q81LF0|OBG_BACAN GTPase Obg OS=Bacillus anthracis GN=obg PE=3 SV=1	Cytoplasmic Protein	1	53.1
Bacillus	Firmicutes	Bacillus cereus	sp|Q9Y295|DRG1_HUMAN Developmentally-regulated GTP-binding protein 1 OS=Homo sapiens GN=DRG1 PE=1 SV=1	sp|B7HE73|OBG_BACC4 GTPase Obg OS=Bacillus cereus (strain B4264) GN=obg PE=3 SV=1	Cytoplasmic Protein	4	90.2
Bacillus	Firmicutes	Lactobacillus plantarum	sp|Q9Y295|DRG1_HUMAN Developmentally-regulated GTP-binding protein 1 OS=Homo sapiens GN=DRG1 PE=1 SV=1	sp|Q88VG4|OBG_LACPL GTPase Obg OS=Lactobacillus plantarum (strain ATCC BAA-793 / NCIMB 8826 / WCFS1) GN=obg PE=3 SV=1	Cytoplasmic Protein	2	68.1
Bacillus	Firmicutes	Lactobacillus helveticus	sp|Q9Y295|DRG1_HUMAN Developmentally-regulated GTP-binding protein 1 OS=Homo sapiens GN=DRG1 PE=1 SV=1	sp|A8YV14|OBG_LACH4 GTPase Obg OS=Lactobacillus helveticus (strain DPC 4571) GN=obg PE=3 SV=1	Cytoplasmic Protein	1	53.1
Bacillus	Firmicutes	Lactobacillus brevis	sp|Q9Y295|DRG1_HUMAN Developmentally-regulated GTP-binding protein 1 OS=Homo sapiens GN=DRG1 PE=1 SV=1	sp|Q03QP2|OBG_LACBA GTPase Obg OS=Lactobacillus brevis (strain ATCC 367 / JCM 1170) GN=obg PE=3 SV=1	Cytoplasmic Protein	4	90.2
Bacillus	Firmicutes	Lactobacillus gasseri	sp|Q9Y295|DRG1_HUMAN Developmentally-regulated GTP-binding protein 1 OS=Homo sapiens GN=DRG1 PE=1 SV=1	sp|Q043W1|OBG_LACGA GTPase Obg OS=Lactobacillus gasseri (strain ATCC 33323 / DSM 20243 / JCM 1131 / NCIMB 11718 / AM63) GN=obg PE=3 SV=1	Cytoplasmic Protein	4	90.2
Bacillus	Firmicutes	Lactobacillus acidophilus	sp|Q9Y295|DRG1_HUMAN Developmentally-regulated GTP-binding protein 1 OS=Homo sapiens GN=DRG1 PE=1 SV=1	sp|Q5FKH5|OBG_LACAC GTPase Obg OS=Lactobacillus acidophilus (strain ATCC 700396 / NCK56 / N2 / NCFM) GN=obg PE=3 SV=1	Cytoplasmic Protein	4	90.2
Bacillus	Firmicutes	Lactobacillus fermentum	sp|Q9Y295|DRG1_HUMAN Developmentally-regulated GTP-binding protein 1 OS=Homo sapiens GN=DRG1 PE=1 SV=1	sp|B2GBD0|OBG_LACF3 GTPase Obg OS=Lactobacillus fermentum (strain NBRC 3956 / LMG 18251) GN=obg PE=3 SV=1	Cytoplasmic Protein	4	90.2
Bacillus	Firmicutes	Lactobacillus johnsonii	sp|Q9Y295|DRG1_HUMAN Developmentally-regulated GTP-binding protein 1 OS=Homo sapiens GN=DRG1 PE=1 SV=1	sp|Q74JN7|OBG_LACJO GTPase Obg OS=Lactobacillus johnsonii (strain CNCM I-12250 / La1 / NCC 533) GN=obg PE=3 SV=1	Cytoplasmic Protein	1	53.1
Bacillus	Firmicutes	Lactobacillus salivarius	sp|Q9Y295|DRG1_HUMAN Developmentally-regulated GTP-binding protein 1 OS=Homo sapiens GN=DRG1 PE=1 SV=1	sp|Q1WT46|OBG_LACS1 GTPase Obg OS=Lactobacillus salivarius (strain UCC118) GN=obg PE=3 SV=1	Cytoplasmic Protein	1	53.1
Bacillus	Firmicutes	Lactobacillus casei	sp|Q9Y295|DRG1_HUMAN Developmentally-regulated GTP-binding protein 1 OS=Homo sapiens GN=DRG1 PE=1 SV=1	sp|B3WE52|OBG_LACCB GTPase Obg OS=Lactobacillus casei (strain BL23) GN=obg PE=3 SV=1	Cytoplasmic Protein	1	53.1
Bacillus	Firmicutes	Lactobacillus casei	sp|Q9Y295|DRG1_HUMAN Developmentally-regulated GTP-binding protein 1 OS=Homo sapiens GN=DRG1 PE=1 SV=1	sp|Q039J3|OBG_LACC3 GTPase Obg OS=Lactobacillus casei (strain ATCC 334) GN=obg PE=3 SV=1	Cytoplasmic Protein	1	53.1
Bacillus	Firmicutes	Bacillus subtilis	sp|Q6IAN0|DRS7B_HUMAN Dehydrogenase/reductase SDR family member 7B OS=Homo sapiens GN=DHRS7B PE=1 SV=2	sp|P42317|YXJF_BACSU Uncharacterized oxidoreductase YxjF OS=Bacillus subtilis (strain 168) GN=yxjF PE=3 SV=2	Cytoplasmic Protein	4	90.2
Bacillus	Firmicutes	Bacillus subtilis	sp|Q6IAN0|DRS7B_HUMAN Dehydrogenase/reductase SDR family member 7B OS=Homo sapiens GN=DHRS7B PE=1 SV=2	sp|P50842|KDUD_BACSU 2-dehydro-3-deoxy-D-gluconate 5-dehydrogenase OS=Bacillus subtilis (strain 168) GN=kduD PE=2 SV=1	Cytoplasmic Protein	1	53.1
Bacillus	Firmicutes	Lactobacillus delbrueckii	sp|P55039|DRG2_HUMAN Developmentally-regulated GTP-binding protein 2 OS=Homo sapiens GN=DRG2 PE=1 SV=1	sp|Q04B11|OBG_LACDB GTPase Obg OS=Lactobacillus delbrueckii subsp. bulgaricus (strain ATCC BAA-365) GN=obg PE=3 SV=1	Cytoplasmic Protein	4	90.2
Bacillus	Firmicutes	Lactobacillus delbrueckii	sp|P55039|DRG2_HUMAN Developmentally-regulated GTP-binding protein 2 OS=Homo sapiens GN=DRG2 PE=1 SV=1	sp|Q1GAM3|OBG_LACDA GTPase Obg OS=Lactobacillus delbrueckii subsp. bulgaricus (strain ATCC 11842 / DSM 20081 / JCM 1002 / NBRC 13953 / NCIMB 11778) GN=obg PE=3 SV=1	Cytoplasmic Protein	1	53.1
Bacillus	Firmicutes	Bacillus subtilis	sp|Q5T2R2|DPS1_HUMAN Decaprenyl-diphosphate synthase subunit 1 OS=Homo sapiens GN=PDSS1 PE=1 SV=1	sp|P31114|HEPS2_BACSU Heptaprenyl diphosphate synthase component 2 OS=Bacillus subtilis (strain 168) GN=hepT PE=1 SV=1	Cytoplasmic Protein	4	90.2
Bacillus	Firmicutes	Bacillus caldotenax	sp|P43003|EAA1_HUMAN Excitatory amino acid transporter 1 OS=Homo sapiens GN=SLC1A3 PE=1 SV=1	sp|P24944|GLTT_BACCA Proton/sodium-glutamate symport protein OS=Bacillus caldotenax GN=gltT PE=1 SV=1	Cytoplasmic Protein	4	90.2
Bacillus	Firmicutes	Bacillus subtilis	sp|P55084|ECHB_HUMAN Trifunctional enzyme subunit beta, mitochondrial OS=Homo sapiens GN=HADHB PE=1 SV=3	sp|O07618|YHFS_BACSU Putative acetyl-CoA C-acetyltransferase YhfS OS=Bacillus subtilis (strain 168) GN=yhfS PE=2 SV=1	Cytoplasmic Protein	1	53.1
Bacillus	Firmicutes	Lactobacillus helveticus	sp|O60344|ECE2_HUMAN Endothelin-converting enzyme 2 OS=Homo sapiens GN=ECE2 PE=1 SV=4	sp|O52071|PEPO_LACHE Neutral endopeptidase OS=Lactobacillus helveticus GN=pepO PE=3 SV=1	Cytoplasmic Protein	4	90.2
Bacillus	Firmicutes	Bacillus subtilis	sp|Q7Z2Z2|EFL1_HUMAN Elongation factor-like GTPase 1 OS=Homo sapiens GN=EFL1 PE=1 SV=2	sp|O07631|TYPA_BACSU GTP-binding protein TypA/BipA homolog OS=Bacillus subtilis (strain 168) GN=typA PE=3 SV=1	Cytoplasmic Protein	4	90.2
Bacillus	Firmicutes	Bacillus methylotrophicus	sp|Q8N8Q3|ENDOV_HUMAN Endonuclease V OS=Homo sapiens GN=ENDOV PE=1 SV=1	sp|A7Z9I5|NFI_BACMF Endonuclease V OS=Bacillus methylotrophicus (strain DSM 23117 / BGSC 10A6 / FZB42) GN=nfi PE=3 SV=1	Cytoplasmic Protein	5	98.1
Bacillus	Firmicutes	Bacillus subtilis	sp|Q8N8Q3|ENDOV_HUMAN Endonuclease V OS=Homo sapiens GN=ENDOV PE=1 SV=1	sp|P96724|NFI_BACSU Endonuclease V OS=Bacillus subtilis (strain 168) GN=nfi PE=1 SV=2	Cytoplasmic Protein	4	90.2
Bacillus	Firmicutes	Bacillus cytotoxicus	sp|P06733|ENOA_HUMAN Alpha-enolase OS=Homo sapiens GN=ENO1 PE=1 SV=2	sp|A7GUR7|ENO_BACCN Enolase OS=Bacillus cytotoxicus (strain DSM 22905 / CIP 110041 / 391-98 / NVH 391-98) GN=eno PE=3 SV=1	Cytoplasmic Protein	4	90.2
Bacillus	Firmicutes	Bacillus thuringiensis	sp|P06733|ENOA_HUMAN Alpha-enolase OS=Homo sapiens GN=ENO1 PE=1 SV=2	sp|Q6HBF3|ENO_BACHK Enolase OS=Bacillus thuringiensis subsp. konkukian (strain 97-27) GN=eno PE=3 SV=1	Cytoplasmic Protein	4	90.2
Bacillus	Firmicutes	Bacillus anthracis	sp|P06733|ENOA_HUMAN Alpha-enolase OS=Homo sapiens GN=ENO1 PE=1 SV=2	sp|C3P0A3|ENO_BACAA Enolase OS=Bacillus anthracis (strain A0248) GN=eno PE=3 SV=1	Cytoplasmic Protein	1	53.1
Bacillus	Firmicutes	Bacillus cereus	sp|P06733|ENOA_HUMAN Alpha-enolase OS=Homo sapiens GN=ENO1 PE=1 SV=2	sp|C1EZA0|ENO_BACC3 Enolase OS=Bacillus cereus (strain 03BB102) GN=eno PE=3 SV=1	Cytoplasmic Protein	4	90.2
Bacillus	Firmicutes	Bacillus thuringiensis	sp|P06733|ENOA_HUMAN Alpha-enolase OS=Homo sapiens GN=ENO1 PE=1 SV=2	sp|A0RKS3|ENO_BACAH Enolase OS=Bacillus thuringiensis (strain Al Hakam) GN=eno PE=3 SV=1	Cytoplasmic Protein	4	90.2
Bacillus	Firmicutes	Bacillus anthracis	sp|P06733|ENOA_HUMAN Alpha-enolase OS=Homo sapiens GN=ENO1 PE=1 SV=2	sp|Q81X78|ENO_BACAN Enolase OS=Bacillus anthracis GN=eno PE=3 SV=1	Cytoplasmic Protein	4	90.2
Bacillus	Firmicutes	Bacillus cereus	sp|P06733|ENOA_HUMAN Alpha-enolase OS=Homo sapiens GN=ENO1 PE=1 SV=2	sp|B7JFG3|ENO_BACC0 Enolase OS=Bacillus cereus (strain AH820) GN=eno PE=3 SV=1	Cytoplasmic Protein	4	90.2
Bacillus	Firmicutes	Bacillus anthracis	sp|P06733|ENOA_HUMAN Alpha-enolase OS=Homo sapiens GN=ENO1 PE=1 SV=2	sp|C3LDI0|ENO_BACAC Enolase OS=Bacillus anthracis (strain CDC 684 / NRRL 3495) GN=eno PE=3 SV=1	Cytoplasmic Protein	4	90.2
Bacillus	Firmicutes	Bacillus cereus	sp|P06733|ENOA_HUMAN Alpha-enolase OS=Homo sapiens GN=ENO1 PE=1 SV=2	sp|Q631M2|ENO_BACCZ Enolase OS=Bacillus cereus (strain ZK / E33L) GN=eno PE=3 SV=1	Cytoplasmic Protein	4	90.2
Bacillus	Firmicutes	Bacillus weihenstephanensis	sp|P06733|ENOA_HUMAN Alpha-enolase OS=Homo sapiens GN=ENO1 PE=1 SV=2	sp|A9VQ48|ENO_BACWK Enolase OS=Bacillus weihenstephanensis (strain KBAB4) GN=eno PE=3 SV=1	Cytoplasmic Protein	4	90.2
Bacillus	Firmicutes	Lactobacillus casei	sp|P06733|ENOA_HUMAN Alpha-enolase OS=Homo sapiens GN=ENO1 PE=1 SV=2	sp|Q03AK4|ENO_LACC3 Enolase OS=Lactobacillus casei (strain ATCC 334) GN=eno PE=3 SV=1	Cytoplasmic Protein	4	90.2
Bacillus	Firmicutes	Bacillus licheniformis	sp|P06733|ENOA_HUMAN Alpha-enolase OS=Homo sapiens GN=ENO1 PE=1 SV=2	sp|Q65EN2|ENO_BACLD Enolase OS=Bacillus licheniformis (strain ATCC 14580 / DSM 13 / JCM 2505 / NBRC 12200 / NCIMB 9375 / NRRL NRS-1264 / Gibson 46) GN=eno PE=3 SV=1	Cytoplasmic Protein	1	53.1
Bacillus	Firmicutes	Lactobacillus casei	sp|P06733|ENOA_HUMAN Alpha-enolase OS=Homo sapiens GN=ENO1 PE=1 SV=2	sp|B3WCW7|ENO_LACCB Enolase OS=Lactobacillus casei (strain BL23) GN=eno PE=3 SV=1	Cytoplasmic Protein	4	90.2
Bacillus	Firmicutes	Lactobacillus plantarum	sp|P06733|ENOA_HUMAN Alpha-enolase OS=Homo sapiens GN=ENO1 PE=1 SV=2	sp|Q88YH3|ENO1_LACPL Enolase 1 OS=Lactobacillus plantarum (strain ATCC BAA-793 / NCIMB 8826 / WCFS1) GN=eno1 PE=3 SV=1	Cytoplasmic Protein	3	71.1
Bacillus	Firmicutes	Bacillus methylotrophicus	sp|P06733|ENOA_HUMAN Alpha-enolase OS=Homo sapiens GN=ENO1 PE=1 SV=2	sp|A7Z8Y1|ENO_BACMF Enolase OS=Bacillus methylotrophicus (strain DSM 23117 / BGSC 10A6 / FZB42) GN=eno PE=3 SV=1	Cytoplasmic Protein	1	53.1
Bacillus	Firmicutes	Bacillus subtilis	sp|P06733|ENOA_HUMAN Alpha-enolase OS=Homo sapiens GN=ENO1 PE=1 SV=2	sp|P37869|ENO_BACSU Enolase OS=Bacillus subtilis (strain 168) GN=eno PE=1 SV=4	Cytoplasmic Protein	4	90.2
Bacillus	Firmicutes	Bacillus pumilus	sp|P06733|ENOA_HUMAN Alpha-enolase OS=Homo sapiens GN=ENO1 PE=1 SV=2	sp|A8FHJ0|ENO_BACP2 Enolase OS=Bacillus pumilus (strain SAFR-032) GN=eno PE=3 SV=1	Cytoplasmic Protein	1	53.1
Bacillus	Firmicutes	Bacillus cereus	sp|P06733|ENOA_HUMAN Alpha-enolase OS=Homo sapiens GN=ENO1 PE=1 SV=2	sp|B7HW52|ENO_BACC7 Enolase OS=Bacillus cereus (strain AH187) GN=eno PE=3 SV=1	Cytoplasmic Protein	1	53.1
Bacillus	Firmicutes	Bacillus cereus	sp|P06733|ENOA_HUMAN Alpha-enolase OS=Homo sapiens GN=ENO1 PE=1 SV=2	sp|B9J4M4|ENO_BACCQ Enolase OS=Bacillus cereus (strain Q1) GN=eno PE=3 SV=1	Cytoplasmic Protein	1	53.1
Bacillus	Firmicutes	Bacillus cereus	sp|P06733|ENOA_HUMAN Alpha-enolase OS=Homo sapiens GN=ENO1 PE=1 SV=2	sp|Q72XY5|ENO_BACC1 Enolase OS=Bacillus cereus (strain ATCC 10987 / NRS 248) GN=eno PE=3 SV=1	Cytoplasmic Protein	1	53.1
Bacillus	Firmicutes	Bacillus cereus	sp|P06733|ENOA_HUMAN Alpha-enolase OS=Homo sapiens GN=ENO1 PE=1 SV=2	sp|B7HED2|ENO_BACC4 Enolase OS=Bacillus cereus (strain B4264) GN=eno PE=3 SV=1	Cytoplasmic Protein	4	90.2
Bacillus	Firmicutes	Bacillus cereus	sp|P06733|ENOA_HUMAN Alpha-enolase OS=Homo sapiens GN=ENO1 PE=1 SV=2	sp|Q815K8|ENO_BACCR Enolase OS=Bacillus cereus (strain ATCC 14579 / DSM 31 / JCM 2152 / NBRC 15305 / NCIMB 9373 / NRRL B-3711) GN=eno PE=3 SV=1	Cytoplasmic Protein	4	90.2
Bacillus	Firmicutes	Bacillus cereus	sp|P06733|ENOA_HUMAN Alpha-enolase OS=Homo sapiens GN=ENO1 PE=1 SV=2	sp|B7IP20|ENO_BACC2 Enolase OS=Bacillus cereus (strain G9842) GN=eno PE=3 SV=1	Cytoplasmic Protein	4	90.2
Bacillus	Firmicutes	Lactobacillus johnsonii	sp|P06733|ENOA_HUMAN Alpha-enolase OS=Homo sapiens GN=ENO1 PE=1 SV=2	sp|Q74K78|ENO1_LACJO Enolase 1 OS=Lactobacillus johnsonii (strain CNCM I-12250 / La1 / NCC 533) GN=eno1 PE=3 SV=1	Cytoplasmic Protein	1	53.1
Bacillus	Firmicutes	Lactobacillus gasseri	sp|P06733|ENOA_HUMAN Alpha-enolase OS=Homo sapiens GN=ENO1 PE=1 SV=2	sp|Q042F4|ENO2_LACGA Enolase 2 OS=Lactobacillus gasseri (strain ATCC 33323 / DSM 20243 / JCM 1131 / NCIMB 11718 / AM63) GN=eno2 PE=1 SV=1	Cytoplasmic Protein	4	90.2
Bacillus	Firmicutes	Lactobacillus brevis	sp|P06733|ENOA_HUMAN Alpha-enolase OS=Homo sapiens GN=ENO1 PE=1 SV=2	sp|Q03SL5|ENO_LACBA Enolase OS=Lactobacillus brevis (strain ATCC 367 / JCM 1170) GN=eno PE=3 SV=1	Cytoplasmic Protein	1	53.1
Bacillus	Firmicutes	Bacillus clausii	sp|P06733|ENOA_HUMAN Alpha-enolase OS=Homo sapiens GN=ENO1 PE=1 SV=2	sp|Q5WDK9|ENO_BACSK Enolase OS=Bacillus clausii (strain KSM-K16) GN=eno PE=3 SV=1	Cytoplasmic Protein	4	90.2
Bacillus	Firmicutes	Bacillus halodurans	sp|P06733|ENOA_HUMAN Alpha-enolase OS=Homo sapiens GN=ENO1 PE=1 SV=2	sp|Q9K717|ENO_BACHD Enolase OS=Bacillus halodurans (strain ATCC BAA-125 / DSM 18197 / FERM 7344 / JCM 9153 / C-125) GN=eno PE=3 SV=1	Cytoplasmic Protein	4	90.2
Bacillus	Firmicutes	Bacillus clausii	sp|P14625|ENPL_HUMAN Endoplasmin OS=Homo sapiens GN=HSP90B1 PE=1 SV=1	sp|Q5WJE6|HTPG_BACSK Chaperone protein HtpG OS=Bacillus clausii (strain KSM-K16) GN=htpG PE=3 SV=1	Cytoplasmic Protein	4	90.2
Bacillus	Firmicutes	Bacillus subtilis	sp|P14625|ENPL_HUMAN Endoplasmin OS=Homo sapiens GN=HSP90B1 PE=1 SV=1	sp|P46208|HTPG_BACSU Chaperone protein HtpG OS=Bacillus subtilis (strain 168) GN=htpG PE=3 SV=1	Cytoplasmic Protein	4	90.2
Bacillus	Firmicutes	Bacillus methylotrophicus	sp|P14625|ENPL_HUMAN Endoplasmin OS=Homo sapiens GN=HSP90B1 PE=1 SV=1	sp|A7ZAI5|HTPG_BACMF Chaperone protein HtpG OS=Bacillus methylotrophicus (strain DSM 23117 / BGSC 10A6 / FZB42) GN=htpG PE=3 SV=1	Cytoplasmic Protein	4	90.2
Bacillus	Firmicutes	Bacillus halodurans	sp|P14625|ENPL_HUMAN Endoplasmin OS=Homo sapiens GN=HSP90B1 PE=1 SV=1	sp|Q9KE51|HTPG_BACHD Chaperone protein HtpG OS=Bacillus halodurans (strain ATCC BAA-125 / DSM 18197 / FERM 7344 / JCM 9153 / C-125) GN=htpG PE=3 SV=1	Cytoplasmic Protein	4	90.2
Bacillus	Firmicutes	Bacillus licheniformis	sp|P14625|ENPL_HUMAN Endoplasmin OS=Homo sapiens GN=HSP90B1 PE=1 SV=1	sp|Q65CZ5|HTPG_BACLD Chaperone protein HtpG OS=Bacillus licheniformis (strain ATCC 14580 / DSM 13 / JCM 2505 / NBRC 12200 / NCIMB 9375 / NRRL NRS-1264 / Gibson 46) GN=htpG PE=3 SV=1	Cytoplasmic Protein	1	53.1
Bacillus	Firmicutes	Lactobacillus delbrueckii	sp|Q96RP9|EFGM_HUMAN Elongation factor G, mitochondrial OS=Homo sapiens GN=GFM1 PE=1 SV=2	sp|Q1GBM0|EFG_LACDA Elongation factor G OS=Lactobacillus delbrueckii subsp. bulgaricus (strain ATCC 11842 / DSM 20081 / JCM 1002 / NBRC 13953 / NCIMB 11778) GN=fusA PE=3 SV=1	Cytoplasmic Protein	4	90.2
Bacillus	Firmicutes	Lactobacillus delbrueckii	sp|Q96RP9|EFGM_HUMAN Elongation factor G, mitochondrial OS=Homo sapiens GN=GFM1 PE=1 SV=2	sp|Q04C17|EFG_LACDB Elongation factor G OS=Lactobacillus delbrueckii subsp. bulgaricus (strain ATCC BAA-365) GN=fusA PE=3 SV=1	Cytoplasmic Protein	4	90.2
Bacillus	Firmicutes	Lactobacillus fermentum	sp|Q96RP9|EFGM_HUMAN Elongation factor G, mitochondrial OS=Homo sapiens GN=GFM1 PE=1 SV=2	sp|B2GDX1|EFG_LACF3 Elongation factor G OS=Lactobacillus fermentum (strain NBRC 3956 / LMG 18251) GN=fusA PE=3 SV=1	Cytoplasmic Protein	4	90.2
Bacillus	Firmicutes	Bacillus pumilus	sp|Q96RP9|EFGM_HUMAN Elongation factor G, mitochondrial OS=Homo sapiens GN=GFM1 PE=1 SV=2	sp|A8F981|EFG_BACP2 Elongation factor G OS=Bacillus pumilus (strain SAFR-032) GN=fusA PE=3 SV=1	Cytoplasmic Protein	4	90.2
Bacillus	Firmicutes	Lactobacillus sakei	sp|Q96RP9|EFGM_HUMAN Elongation factor G, mitochondrial OS=Homo sapiens GN=GFM1 PE=1 SV=2	sp|Q38UQ9|EFG_LACSS Elongation factor G OS=Lactobacillus sakei subsp. sakei (strain 23K) GN=fusA PE=3 SV=1	Cytoplasmic Protein	1	53.1
Bacillus	Firmicutes	Bacillus licheniformis	sp|Q96RP9|EFGM_HUMAN Elongation factor G, mitochondrial OS=Homo sapiens GN=GFM1 PE=1 SV=2	sp|Q65PB0|EFG_BACLD Elongation factor G OS=Bacillus licheniformis (strain ATCC 14580 / DSM 13 / JCM 2505 / NBRC 12200 / NCIMB 9375 / NRRL NRS-1264 / Gibson 46) GN=fusA PE=3 SV=1	Cytoplasmic Protein	4	90.2
Bacillus	Firmicutes	Bacillus methylotrophicus	sp|Q96RP9|EFGM_HUMAN Elongation factor G, mitochondrial OS=Homo sapiens GN=GFM1 PE=1 SV=2	sp|A7Z0N4|EFG_BACMF Elongation factor G OS=Bacillus methylotrophicus (strain DSM 23117 / BGSC 10A6 / FZB42) GN=fusA PE=3 SV=1	Cytoplasmic Protein	1	53.1
Bacillus	Firmicutes	Lactobacillus brevis	sp|Q96RP9|EFGM_HUMAN Elongation factor G, mitochondrial OS=Homo sapiens GN=GFM1 PE=1 SV=2	sp|Q03PV4|EFG_LACBA Elongation factor G OS=Lactobacillus brevis (strain ATCC 367 / JCM 1170) GN=fusA PE=3 SV=1	Cytoplasmic Protein	4	90.2
Bacillus	Firmicutes	Bacillus subtilis	sp|Q96RP9|EFGM_HUMAN Elongation factor G, mitochondrial OS=Homo sapiens GN=GFM1 PE=1 SV=2	sp|P80868|EFG_BACSU Elongation factor G OS=Bacillus subtilis (strain 168) GN=fusA PE=1 SV=3	Cytoplasmic Protein	1	53.1
Bacillus	Firmicutes	Lactobacillus johnsonii	sp|Q96RP9|EFGM_HUMAN Elongation factor G, mitochondrial OS=Homo sapiens GN=GFM1 PE=1 SV=2	sp|Q74L90|EFG_LACJO Elongation factor G OS=Lactobacillus johnsonii (strain CNCM I-12250 / La1 / NCC 533) GN=fusA PE=3 SV=1	Cytoplasmic Protein	1	53.1
Bacillus	Firmicutes	Lactobacillus reuteri	sp|Q96RP9|EFGM_HUMAN Elongation factor G, mitochondrial OS=Homo sapiens GN=GFM1 PE=1 SV=2	sp|B2G8Y0|EFG_LACRJ Elongation factor G OS=Lactobacillus reuteri (strain JCM 1112) GN=fusA PE=3 SV=1	Cytoplasmic Protein	1	53.1
Bacillus	Firmicutes	Lactobacillus reuteri	sp|Q96RP9|EFGM_HUMAN Elongation factor G, mitochondrial OS=Homo sapiens GN=GFM1 PE=1 SV=2	sp|A5VLK8|EFG_LACRD Elongation factor G OS=Lactobacillus reuteri (strain DSM 20016) GN=fusA PE=3 SV=1	Cytoplasmic Protein	4	90.2
Bacillus	Firmicutes	Bacillus weihenstephanensis	sp|Q96RP9|EFGM_HUMAN Elongation factor G, mitochondrial OS=Homo sapiens GN=GFM1 PE=1 SV=2	sp|A9VP74|EFG_BACWK Elongation factor G OS=Bacillus weihenstephanensis (strain KBAB4) GN=fusA PE=3 SV=1	Cytoplasmic Protein	4	90.2
Bacillus	Firmicutes	Bacillus cereus	sp|Q96RP9|EFGM_HUMAN Elongation factor G, mitochondrial OS=Homo sapiens GN=GFM1 PE=1 SV=2	sp|Q814C5|EFG_BACCR Elongation factor G OS=Bacillus cereus (strain ATCC 14579 / DSM 31 / JCM 2152 / NBRC 15305 / NCIMB 9373 / NRRL B-3711) GN=fusA PE=3 SV=1	Cytoplasmic Protein	4	90.2
Bacillus	Firmicutes	Bacillus cereus	sp|Q96RP9|EFGM_HUMAN Elongation factor G, mitochondrial OS=Homo sapiens GN=GFM1 PE=1 SV=2	sp|B7HJ45|EFG_BACC4 Elongation factor G OS=Bacillus cereus (strain B4264) GN=fusA PE=3 SV=1	Cytoplasmic Protein	4	90.2
Bacillus	Firmicutes	Bacillus cytotoxicus	sp|Q96RP9|EFGM_HUMAN Elongation factor G, mitochondrial OS=Homo sapiens GN=GFM1 PE=1 SV=2	sp|A7GK17|EFG_BACCN Elongation factor G OS=Bacillus cytotoxicus (strain DSM 22905 / CIP 110041 / 391-98 / NVH 391-98) GN=fusA PE=3 SV=1	Cytoplasmic Protein	5	98.1
Bacillus	Firmicutes	Bacillus anthracis	sp|Q96RP9|EFGM_HUMAN Elongation factor G, mitochondrial OS=Homo sapiens GN=GFM1 PE=1 SV=2	sp|C3LJ79|EFG_BACAC Elongation factor G OS=Bacillus anthracis (strain CDC 684 / NRRL 3495) GN=fusA PE=3 SV=1	Cytoplasmic Protein	1	53.1
Bacillus	Firmicutes	Lactobacillus casei	sp|Q96RP9|EFGM_HUMAN Elongation factor G, mitochondrial OS=Homo sapiens GN=GFM1 PE=1 SV=2	sp|B3WAM2|EFG_LACCB Elongation factor G OS=Lactobacillus casei (strain BL23) GN=fusA PE=3 SV=1	Cytoplasmic Protein	4	90.2
Bacillus	Firmicutes	Lactobacillus casei	sp|Q96RP9|EFGM_HUMAN Elongation factor G, mitochondrial OS=Homo sapiens GN=GFM1 PE=1 SV=2	sp|Q034X8|EFG_LACC3 Elongation factor G OS=Lactobacillus casei (strain ATCC 334) GN=fusA PE=3 SV=1	Cytoplasmic Protein	4	90.2
Bacillus	Firmicutes	Bacillus cereus	sp|Q96RP9|EFGM_HUMAN Elongation factor G, mitochondrial OS=Homo sapiens GN=GFM1 PE=1 SV=2	sp|Q63H93|EFG_BACCZ Elongation factor G OS=Bacillus cereus (strain ZK / E33L) GN=fusA PE=3 SV=1	Cytoplasmic Protein	4	90.2
Bacillus	Firmicutes	Bacillus thuringiensis	sp|Q96RP9|EFGM_HUMAN Elongation factor G, mitochondrial OS=Homo sapiens GN=GFM1 PE=1 SV=2	sp|Q6HPR1|EFG_BACHK Elongation factor G OS=Bacillus thuringiensis subsp. konkukian (strain 97-27) GN=fusA PE=3 SV=1	Cytoplasmic Protein	4	90.2
Bacillus	Firmicutes	Bacillus cereus	sp|Q96RP9|EFGM_HUMAN Elongation factor G, mitochondrial OS=Homo sapiens GN=GFM1 PE=1 SV=2	sp|C1ET36|EFG_BACC3 Elongation factor G OS=Bacillus cereus (strain 03BB102) GN=fusA PE=3 SV=1	Cytoplasmic Protein	4	90.2
Bacillus	Firmicutes	Bacillus anthracis	sp|Q96RP9|EFGM_HUMAN Elongation factor G, mitochondrial OS=Homo sapiens GN=GFM1 PE=1 SV=2	sp|Q81VT3|EFG_BACAN Elongation factor G OS=Bacillus anthracis GN=fusA PE=3 SV=1	Cytoplasmic Protein	4	90.2
Bacillus	Firmicutes	Bacillus anthracis	sp|Q96RP9|EFGM_HUMAN Elongation factor G, mitochondrial OS=Homo sapiens GN=GFM1 PE=1 SV=2	sp|C3P9Q2|EFG_BACAA Elongation factor G OS=Bacillus anthracis (strain A0248) GN=fusA PE=3 SV=1	Cytoplasmic Protein	4	90.2
Bacillus	Firmicutes	Bacillus cereus	sp|Q96RP9|EFGM_HUMAN Elongation factor G, mitochondrial OS=Homo sapiens GN=GFM1 PE=1 SV=2	sp|B9IZJ1|EFG_BACCQ Elongation factor G OS=Bacillus cereus (strain Q1) GN=fusA PE=3 SV=1	Cytoplasmic Protein	4	90.2
Bacillus	Firmicutes	Bacillus cereus	sp|Q96RP9|EFGM_HUMAN Elongation factor G, mitochondrial OS=Homo sapiens GN=GFM1 PE=1 SV=2	sp|B7HQU1|EFG_BACC7 Elongation factor G OS=Bacillus cereus (strain AH187) GN=fusA PE=3 SV=1	Cytoplasmic Protein	4	90.2
Bacillus	Firmicutes	Lactobacillus gasseri	sp|Q96RP9|EFGM_HUMAN Elongation factor G, mitochondrial OS=Homo sapiens GN=GFM1 PE=1 SV=2	sp|Q046C7|EFG_LACGA Elongation factor G OS=Lactobacillus gasseri (strain ATCC 33323 / DSM 20243 / JCM 1131 / NCIMB 11718 / AM63) GN=fusA PE=3 SV=1	Cytoplasmic Protein	4	90.2
Bacillus	Firmicutes	Lactobacillus helveticus	sp|Q96RP9|EFGM_HUMAN Elongation factor G, mitochondrial OS=Homo sapiens GN=GFM1 PE=1 SV=2	sp|A8YXK3|EFG_LACH4 Elongation factor G OS=Lactobacillus helveticus (strain DPC 4571) GN=fusA PE=3 SV=1	Cytoplasmic Protein	4	90.2
Bacillus	Firmicutes	Bacillus cereus	sp|Q96RP9|EFGM_HUMAN Elongation factor G, mitochondrial OS=Homo sapiens GN=GFM1 PE=1 SV=2	sp|Q73F99|EFG_BACC1 Elongation factor G OS=Bacillus cereus (strain ATCC 10987 / NRS 248) GN=fusA PE=3 SV=1	Cytoplasmic Protein	4	90.2
Bacillus	Firmicutes	Bacillus cereus	sp|Q96RP9|EFGM_HUMAN Elongation factor G, mitochondrial OS=Homo sapiens GN=GFM1 PE=1 SV=2	sp|B7IT16|EFG_BACC2 Elongation factor G OS=Bacillus cereus (strain G9842) GN=fusA PE=3 SV=1	Cytoplasmic Protein	4	90.2
Bacillus	Firmicutes	Lactobacillus plantarum	sp|Q96RP9|EFGM_HUMAN Elongation factor G, mitochondrial OS=Homo sapiens GN=GFM1 PE=1 SV=2	sp|Q88XY8|EFG_LACPL Elongation factor G OS=Lactobacillus plantarum (strain ATCC BAA-793 / NCIMB 8826 / WCFS1) GN=fusA PE=3 SV=1	Cytoplasmic Protein	4	90.2
Bacillus	Firmicutes	Lactobacillus acidophilus	sp|Q96RP9|EFGM_HUMAN Elongation factor G, mitochondrial OS=Homo sapiens GN=GFM1 PE=1 SV=2	sp|Q5FM92|EFG_LACAC Elongation factor G OS=Lactobacillus acidophilus (strain ATCC 700396 / NCK56 / N2 / NCFM) GN=fusA PE=3 SV=1	Cytoplasmic Protein	4	90.2
Bacillus	Firmicutes	Bacillus cereus	sp|Q96RP9|EFGM_HUMAN Elongation factor G, mitochondrial OS=Homo sapiens GN=GFM1 PE=1 SV=2	sp|B7JKB6|EFG_BACC0 Elongation factor G OS=Bacillus cereus (strain AH820) GN=fusA PE=3 SV=1	Cytoplasmic Protein	1	53.1
Bacillus	Firmicutes	Lactobacillus salivarius	sp|Q96RP9|EFGM_HUMAN Elongation factor G, mitochondrial OS=Homo sapiens GN=GFM1 PE=1 SV=2	sp|Q1WVA0|EFG_LACS1 Elongation factor G OS=Lactobacillus salivarius (strain UCC118) GN=fusA PE=3 SV=1	Cytoplasmic Protein	1	53.1
Bacillus	Firmicutes	Lactobacillus helveticus	sp|P49411|EFTU_HUMAN Elongation factor Tu, mitochondrial OS=Homo sapiens GN=TUFM PE=1 SV=2	sp|A8YUS2|EFTU_LACH4 Elongation factor Tu OS=Lactobacillus helveticus (strain DPC 4571) GN=tuf PE=3 SV=1	Cytoplasmic Protein	4	90.2
Bacillus	Firmicutes	Lactobacillus johnsonii	sp|P49411|EFTU_HUMAN Elongation factor Tu, mitochondrial OS=Homo sapiens GN=TUFM PE=1 SV=2	sp|Q74JU6|EFTU_LACJO Elongation factor Tu OS=Lactobacillus johnsonii (strain CNCM I-12250 / La1 / NCC 533) GN=tuf PE=3 SV=1	Cytoplasmic Protein	4	90.2
Bacillus	Firmicutes	Lactobacillus gasseri	sp|P49411|EFTU_HUMAN Elongation factor Tu, mitochondrial OS=Homo sapiens GN=TUFM PE=1 SV=2	sp|Q042T5|EFTU_LACGA Elongation factor Tu OS=Lactobacillus gasseri (strain ATCC 33323 / DSM 20243 / JCM 1131 / NCIMB 11718 / AM63) GN=tuf PE=3 SV=2	Cytoplasmic Protein	4	90.2
Bacillus	Firmicutes	Lactobacillus acidophilus	sp|P49411|EFTU_HUMAN Elongation factor Tu, mitochondrial OS=Homo sapiens GN=TUFM PE=1 SV=2	sp|Q5FKR8|EFTU_LACAC Elongation factor Tu OS=Lactobacillus acidophilus (strain ATCC 700396 / NCK56 / N2 / NCFM) GN=tuf PE=3 SV=1	Cytoplasmic Protein	4	90.2
Bacillus	Firmicutes	Lactobacillus casei	sp|P49411|EFTU_HUMAN Elongation factor Tu, mitochondrial OS=Homo sapiens GN=TUFM PE=1 SV=2	sp|B3WE38|EFTU_LACCB Elongation factor Tu OS=Lactobacillus casei (strain BL23) GN=tuf PE=3 SV=1	Cytoplasmic Protein	1	53.1
Bacillus	Firmicutes	Lactobacillus casei	sp|P49411|EFTU_HUMAN Elongation factor Tu, mitochondrial OS=Homo sapiens GN=TUFM PE=1 SV=2	sp|Q039K9|EFTU_LACC3 Elongation factor Tu OS=Lactobacillus casei (strain ATCC 334) GN=tuf PE=3 SV=1	Cytoplasmic Protein	4	90.2
Bacillus	Firmicutes	Lactobacillus delbrueckii	sp|P49411|EFTU_HUMAN Elongation factor Tu, mitochondrial OS=Homo sapiens GN=TUFM PE=1 SV=2	sp|Q04B37|EFTU_LACDB Elongation factor Tu OS=Lactobacillus delbrueckii subsp. bulgaricus (strain ATCC BAA-365) GN=tuf PE=3 SV=1	Cytoplasmic Protein	4	90.2
Bacillus	Firmicutes	Lactobacillus delbrueckii	sp|P49411|EFTU_HUMAN Elongation factor Tu, mitochondrial OS=Homo sapiens GN=TUFM PE=1 SV=2	sp|Q1GAQ0|EFTU_LACDA Elongation factor Tu OS=Lactobacillus delbrueckii subsp. bulgaricus (strain ATCC 11842 / DSM 20081 / JCM 1002 / NBRC 13953 / NCIMB 11778) GN=tuf PE=3 SV=1	Cytoplasmic Protein	4	90.2
Bacillus	Firmicutes	Lactobacillus plantarum	sp|P49411|EFTU_HUMAN Elongation factor Tu, mitochondrial OS=Homo sapiens GN=TUFM PE=1 SV=2	sp|Q88VE0|EFTU_LACPL Elongation factor Tu OS=Lactobacillus plantarum (strain ATCC BAA-793 / NCIMB 8826 / WCFS1) GN=tuf PE=3 SV=1	Cytoplasmic Protein	1	53.1
Bacillus	Firmicutes	Bacillus cytotoxicus	sp|P49411|EFTU_HUMAN Elongation factor Tu, mitochondrial OS=Homo sapiens GN=TUFM PE=1 SV=2	sp|A7GK18|EFTU_BACCN Elongation factor Tu OS=Bacillus cytotoxicus (strain DSM 22905 / CIP 110041 / 391-98 / NVH 391-98) GN=tuf PE=3 SV=1	Cytoplasmic Protein	4	90.2
Bacillus	Firmicutes	Lactobacillus sakei	sp|P49411|EFTU_HUMAN Elongation factor Tu, mitochondrial OS=Homo sapiens GN=TUFM PE=1 SV=2	sp|Q38WR7|EFTU_LACSS Elongation factor Tu OS=Lactobacillus sakei subsp. sakei (strain 23K) GN=tuf PE=3 SV=1	Cytoplasmic Protein	4	90.2
Bacillus	Firmicutes	Bacillus weihenstephanensis	sp|P49411|EFTU_HUMAN Elongation factor Tu, mitochondrial OS=Homo sapiens GN=TUFM PE=1 SV=2	sp|A9VP75|EFTU_BACWK Elongation factor Tu OS=Bacillus weihenstephanensis (strain KBAB4) GN=tuf PE=3 SV=1	Cytoplasmic Protein	5	98.1
Bacillus	Firmicutes	Lactobacillus brevis	sp|P49411|EFTU_HUMAN Elongation factor Tu, mitochondrial OS=Homo sapiens GN=TUFM PE=1 SV=2	sp|Q03QN5|EFTU_LACBA Elongation factor Tu OS=Lactobacillus brevis (strain ATCC 367 / JCM 1170) GN=tuf PE=3 SV=1	Cytoplasmic Protein	1	53.1
Bacillus	Firmicutes	Bacillus thuringiensis	sp|P49411|EFTU_HUMAN Elongation factor Tu, mitochondrial OS=Homo sapiens GN=TUFM PE=1 SV=2	sp|Q6HPR0|EFTU_BACHK Elongation factor Tu OS=Bacillus thuringiensis subsp. konkukian (strain 97-27) GN=tuf PE=3 SV=1	Cytoplasmic Protein	1	53.1
Bacillus	Firmicutes	Bacillus cereus	sp|P49411|EFTU_HUMAN Elongation factor Tu, mitochondrial OS=Homo sapiens GN=TUFM PE=1 SV=2	sp|Q814C4|EFTU_BACCR Elongation factor Tu OS=Bacillus cereus (strain ATCC 14579 / DSM 31 / JCM 2152 / NBRC 15305 / NCIMB 9373 / NRRL B-3711) GN=tuf PE=3 SV=1	Cytoplasmic Protein	4	90.2
Bacillus	Firmicutes	Bacillus cereus	sp|P49411|EFTU_HUMAN Elongation factor Tu, mitochondrial OS=Homo sapiens GN=TUFM PE=1 SV=2	sp|Q63H92|EFTU_BACCZ Elongation factor Tu OS=Bacillus cereus (strain ZK / E33L) GN=tuf PE=3 SV=1	Cytoplasmic Protein	4	90.2
Bacillus	Firmicutes	Bacillus cereus	sp|P49411|EFTU_HUMAN Elongation factor Tu, mitochondrial OS=Homo sapiens GN=TUFM PE=1 SV=2	sp|B7HJ46|EFTU_BACC4 Elongation factor Tu OS=Bacillus cereus (strain B4264) GN=tuf PE=3 SV=1	Cytoplasmic Protein	4	90.2
Bacillus	Firmicutes	Bacillus cereus	sp|P49411|EFTU_HUMAN Elongation factor Tu, mitochondrial OS=Homo sapiens GN=TUFM PE=1 SV=2	sp|C1ET37|EFTU_BACC3 Elongation factor Tu OS=Bacillus cereus (strain 03BB102) GN=tuf PE=3 SV=1	Cytoplasmic Protein	4	90.2
Bacillus	Firmicutes	Bacillus thuringiensis	sp|P49411|EFTU_HUMAN Elongation factor Tu, mitochondrial OS=Homo sapiens GN=TUFM PE=1 SV=2	sp|A0R8H8|EFTU_BACAH Elongation factor Tu OS=Bacillus thuringiensis (strain Al Hakam) GN=tuf PE=3 SV=1	Cytoplasmic Protein	1	53.1
Bacillus	Firmicutes	Bacillus cereus	sp|P49411|EFTU_HUMAN Elongation factor Tu, mitochondrial OS=Homo sapiens GN=TUFM PE=1 SV=2	sp|B7JKB7|EFTU_BACC0 Elongation factor Tu OS=Bacillus cereus (strain AH820) GN=tuf PE=3 SV=1	Cytoplasmic Protein	1	53.1
Bacillus	Firmicutes	Bacillus anthracis	sp|P49411|EFTU_HUMAN Elongation factor Tu, mitochondrial OS=Homo sapiens GN=TUFM PE=1 SV=2	sp|C3LJ80|EFTU_BACAC Elongation factor Tu OS=Bacillus anthracis (strain CDC 684 / NRRL 3495) GN=tuf PE=3 SV=1	Cytoplasmic Protein	4	90.2
Bacillus	Firmicutes	Bacillus anthracis	sp|P49411|EFTU_HUMAN Elongation factor Tu, mitochondrial OS=Homo sapiens GN=TUFM PE=1 SV=2	sp|Q81VT2|EFTU_BACAN Elongation factor Tu OS=Bacillus anthracis GN=tuf PE=3 SV=1	Cytoplasmic Protein	4	90.2
Bacillus	Firmicutes	Bacillus anthracis	sp|P49411|EFTU_HUMAN Elongation factor Tu, mitochondrial OS=Homo sapiens GN=TUFM PE=1 SV=2	sp|C3P9Q3|EFTU_BACAA Elongation factor Tu OS=Bacillus anthracis (strain A0248) GN=tuf PE=3 SV=1	Cytoplasmic Protein	4	90.2
Bacillus	Firmicutes	Bacillus cereus	sp|P49411|EFTU_HUMAN Elongation factor Tu, mitochondrial OS=Homo sapiens GN=TUFM PE=1 SV=2	sp|B9IZJ2|EFTU_BACCQ Elongation factor Tu OS=Bacillus cereus (strain Q1) GN=tuf PE=3 SV=1	Cytoplasmic Protein	4	90.2
Bacillus	Firmicutes	Bacillus cereus	sp|P49411|EFTU_HUMAN Elongation factor Tu, mitochondrial OS=Homo sapiens GN=TUFM PE=1 SV=2	sp|B7HQU2|EFTU_BACC7 Elongation factor Tu OS=Bacillus cereus (strain AH187) GN=tuf PE=3 SV=1	Cytoplasmic Protein	4	90.2
Bacillus	Firmicutes	Bacillus cereus	sp|P49411|EFTU_HUMAN Elongation factor Tu, mitochondrial OS=Homo sapiens GN=TUFM PE=1 SV=2	sp|Q73F98|EFTU_BACC1 Elongation factor Tu OS=Bacillus cereus (strain ATCC 10987 / NRS 248) GN=tuf PE=3 SV=1	Cytoplasmic Protein	5	98.1
Bacillus	Firmicutes	Bacillus cereus	sp|P49411|EFTU_HUMAN Elongation factor Tu, mitochondrial OS=Homo sapiens GN=TUFM PE=1 SV=2	sp|B7IT17|EFTU_BACC2 Elongation factor Tu OS=Bacillus cereus (strain G9842) GN=tuf PE=3 SV=1	Cytoplasmic Protein	1	53.1
Bacillus	Firmicutes	Lactobacillus salivarius	sp|P49411|EFTU_HUMAN Elongation factor Tu, mitochondrial OS=Homo sapiens GN=TUFM PE=1 SV=2	sp|Q1WU83|EFTU_LACS1 Elongation factor Tu OS=Lactobacillus salivarius (strain UCC118) GN=tuf PE=3 SV=1	Cytoplasmic Protein	4	90.2
Bacillus	Firmicutes	Bacillus subtilis	sp|P49411|EFTU_HUMAN Elongation factor Tu, mitochondrial OS=Homo sapiens GN=TUFM PE=1 SV=2	sp|P33166|EFTU_BACSU Elongation factor Tu OS=Bacillus subtilis (strain 168) GN=tuf PE=3 SV=1	Cytoplasmic Protein	1	53.1
Bacillus	Firmicutes	Lactobacillus fermentum	sp|P49411|EFTU_HUMAN Elongation factor Tu, mitochondrial OS=Homo sapiens GN=TUFM PE=1 SV=2	sp|B2GBC2|EFTU_LACF3 Elongation factor Tu OS=Lactobacillus fermentum (strain NBRC 3956 / LMG 18251) GN=tuf PE=3 SV=1	Cytoplasmic Protein	1	53.1
Bacillus	Firmicutes	Bacillus pumilus	sp|P49411|EFTU_HUMAN Elongation factor Tu, mitochondrial OS=Homo sapiens GN=TUFM PE=1 SV=2	sp|A8F982|EFTU_BACP2 Elongation factor Tu OS=Bacillus pumilus (strain SAFR-032) GN=tuf PE=3 SV=1	Cytoplasmic Protein	1	53.1
Bacillus	Firmicutes	Bacillus subtilis	sp|Q8IUS5|EPHX4_HUMAN Epoxide hydrolase 4 OS=Homo sapiens GN=EPHX4 PE=2 SV=2	sp|O31581|YFHM_BACSU AB hydrolase superfamily protein YfhM OS=Bacillus subtilis (strain 168) GN=yfhM PE=3 SV=1	Cytoplasmic Protein	4	90.2
Bacillus	Firmicutes	Bacillus subtilis	sp|Q2NKX8|ERC6L_HUMAN DNA excision repair protein ERCC-6-like OS=Homo sapiens GN=ERCC6L PE=1 SV=1	sp|P94593|YWQA_BACSU Uncharacterized ATP-dependent helicase YwqA OS=Bacillus subtilis (strain 168) GN=ywqA PE=3 SV=2	Cytoplasmic Protein	1	53.1
Bacillus	Firmicutes	Lactobacillus salivarius	sp|P13929|ENOB_HUMAN Beta-enolase OS=Homo sapiens GN=ENO3 PE=1 SV=5	sp|Q1WSY0|ENO_LACS1 Enolase OS=Lactobacillus salivarius (strain UCC118) GN=eno PE=3 SV=1	Cytoplasmic Protein	1	53.1
Bacillus	Firmicutes	Lactobacillus fermentum	sp|P13929|ENOB_HUMAN Beta-enolase OS=Homo sapiens GN=ENO3 PE=1 SV=5	sp|B2GAM0|ENO_LACF3 Enolase OS=Lactobacillus fermentum (strain NBRC 3956 / LMG 18251) GN=eno PE=3 SV=1	Cytoplasmic Protein	4	90.2
Bacillus	Firmicutes	Lactobacillus sakei	sp|P13929|ENOB_HUMAN Beta-enolase OS=Homo sapiens GN=ENO3 PE=1 SV=5	sp|Q38Y18|ENO_LACSS Enolase OS=Lactobacillus sakei subsp. sakei (strain 23K) GN=eno PE=3 SV=1	Cytoplasmic Protein	4	90.2
Bacillus	Firmicutes	Bacillus subtilis	sp|P13804|ETFA_HUMAN Electron transfer flavoprotein subunit alpha, mitochondrial OS=Homo sapiens GN=ETFA PE=1 SV=1	sp|P94551|ETFA_BACSU Electron transfer flavoprotein subunit alpha OS=Bacillus subtilis (strain 168) GN=etfA PE=3 SV=1	Cytoplasmic Protein	1	53.1
Bacillus	Firmicutes	Bacillus subtilis	sp|P49327|FAS_HUMAN Fatty acid synthase OS=Homo sapiens GN=FASN PE=1 SV=3	sp|Q05470|PKSL_BACSU Polyketide synthase PksL OS=Bacillus subtilis (strain 168) GN=pksL PE=1 SV=3	Cytoplasmic Protein	1	53.1
Bacillus	Firmicutes	Bacillus subtilis	sp|P49327|FAS_HUMAN Fatty acid synthase OS=Homo sapiens GN=FASN PE=1 SV=3	sp|O31782|PKSN_BACSU Polyketide synthase PksN OS=Bacillus subtilis (strain 168) GN=pksN PE=1 SV=3	Cytoplasmic Protein	4	90.2
Bacillus	Firmicutes	Bacillus subtilis	sp|P49327|FAS_HUMAN Fatty acid synthase OS=Homo sapiens GN=FASN PE=1 SV=3	sp|Q9R9J1|MYCA_BACIU Mycosubtilin synthase subunit A OS=Bacillus subtilis GN=mycA PE=3 SV=1	Cytoplasmic Protein	4	90.2
Bacillus	Firmicutes	Bacillus subtilis	sp|Q14254|FLOT2_HUMAN Flotillin-2 OS=Homo sapiens GN=FLOT2 PE=1 SV=2	sp|O32076|YUAG_BACSU Uncharacterized protein YuaG OS=Bacillus subtilis (strain 168) GN=yuaG PE=4 SV=1	Cytoplasmic Protein	1	53.1
Bacillus	Firmicutes	Bacillus subtilis	sp|P11413|G6PD_HUMAN Glucose-6-phosphate 1-dehydrogenase OS=Homo sapiens GN=G6PD PE=1 SV=4	sp|P54547|G6PD_BACSU Glucose-6-phosphate 1-dehydrogenase OS=Bacillus subtilis (strain 168) GN=zwf PE=1 SV=2	Cytoplasmic Protein	4	90.2
Bacillus	Firmicutes	Bacillus subtilis	sp|P51570|GALK1_HUMAN Galactokinase OS=Homo sapiens GN=GALK1 PE=1 SV=1	sp|P39574|GAL1_BACSU Galactokinase OS=Bacillus subtilis (strain 168) GN=galK PE=3 SV=1	Cytoplasmic Protein	4	90.2
Bacillus	Firmicutes	Bacillus halodurans	sp|P51570|GALK1_HUMAN Galactokinase OS=Homo sapiens GN=GALK1 PE=1 SV=1	sp|Q9KDV4|GAL1_BACHD Galactokinase OS=Bacillus halodurans (strain ATCC BAA-125 / DSM 18197 / FERM 7344 / JCM 9153 / C-125) GN=galK PE=3 SV=1	Cytoplasmic Protein	4	90.2
Bacillus	Firmicutes	Lactobacillus plantarum	sp|P51570|GALK1_HUMAN Galactokinase OS=Homo sapiens GN=GALK1 PE=1 SV=1	sp|Q88SE8|GAL1_LACPL Galactokinase OS=Lactobacillus plantarum (strain ATCC BAA-793 / NCIMB 8826 / WCFS1) GN=galK PE=3 SV=1	Cytoplasmic Protein	4	90.2
Bacillus	Firmicutes	Lactobacillus salivarius	sp|P51570|GALK1_HUMAN Galactokinase OS=Homo sapiens GN=GALK1 PE=1 SV=1	sp|Q1WUZ4|GAL1_LACS1 Galactokinase OS=Lactobacillus salivarius (strain UCC118) GN=galK PE=3 SV=1	Cytoplasmic Protein	1	53.1
Bacillus	Firmicutes	Lactobacillus casei	sp|P51570|GALK1_HUMAN Galactokinase OS=Homo sapiens GN=GALK1 PE=1 SV=1	sp|O84902|GAL1_LACCA Galactokinase OS=Lactobacillus casei GN=galK PE=3 SV=1	Cytoplasmic Protein	4	90.2
Bacillus	Firmicutes	Lactobacillus casei	sp|P51570|GALK1_HUMAN Galactokinase OS=Homo sapiens GN=GALK1 PE=1 SV=1	sp|B3W7I5|GAL1_LACCB Galactokinase OS=Lactobacillus casei (strain BL23) GN=galK PE=3 SV=1	Cytoplasmic Protein	3	71.1
Bacillus	Firmicutes	Lactobacillus casei	sp|P51570|GALK1_HUMAN Galactokinase OS=Homo sapiens GN=GALK1 PE=1 SV=1	sp|Q03BB8|GAL1_LACC3 Galactokinase OS=Lactobacillus casei (strain ATCC 334) GN=galK PE=3 SV=1	Cytoplasmic Protein	4	90.2
Bacillus	Firmicutes	Bacillus megaterium	sp|O14556|G3PT_HUMAN Glyceraldehyde-3-phosphate dehydrogenase, testis-specific OS=Homo sapiens GN=GAPDHS PE=1 SV=2	sp|P23722|G3P_BACMD Glyceraldehyde-3-phosphate dehydrogenase OS=Bacillus megaterium (strain DSM 319) GN=gap PE=3 SV=3	Cytoplasmic Protein	4	90.2
Bacillus	Firmicutes	Bacillus subtilis	sp|O14556|G3PT_HUMAN Glyceraldehyde-3-phosphate dehydrogenase, testis-specific OS=Homo sapiens GN=GAPDHS PE=1 SV=2	sp|P09124|G3P1_BACSU Glyceraldehyde-3-phosphate dehydrogenase 1 OS=Bacillus subtilis (strain 168) GN=gapA PE=1 SV=2	Cytoplasmic Protein	3	71.1
Bacillus	Firmicutes	Bacillus cereus	sp|O14556|G3PT_HUMAN Glyceraldehyde-3-phosphate dehydrogenase, testis-specific OS=Homo sapiens GN=GAPDHS PE=1 SV=2	sp|Q4MQ58|G3P1_BACCE Glyceraldehyde-3-phosphate dehydrogenase 1 OS=Bacillus cereus GN=gap1 PE=1 SV=3	Cytoplasmic Protein	1	53.1
Bacillus	Firmicutes	Bacillus subtilis	sp|O14556|G3PT_HUMAN Glyceraldehyde-3-phosphate dehydrogenase, testis-specific OS=Homo sapiens GN=GAPDHS PE=1 SV=2	sp|O34425|G3P2_BACSU Glyceraldehyde-3-phosphate dehydrogenase 2 OS=Bacillus subtilis (strain 168) GN=gapB PE=1 SV=1	Cytoplasmic Protein	4	90.2
Bacillus	Firmicutes	Bacillus coagulans	sp|O14556|G3PT_HUMAN Glyceraldehyde-3-phosphate dehydrogenase, testis-specific OS=Homo sapiens GN=GAPDHS PE=1 SV=2	sp|P15115|G3P_BACCO Glyceraldehyde-3-phosphate dehydrogenase OS=Bacillus coagulans GN=gap PE=1 SV=2	Cytoplasmic Protein	4	90.2
Bacillus	Firmicutes	Lactobacillus delbrueckii	sp|O14556|G3PT_HUMAN Glyceraldehyde-3-phosphate dehydrogenase, testis-specific OS=Homo sapiens GN=GAPDHS PE=1 SV=2	sp|O32755|G3P_LACDE Glyceraldehyde-3-phosphate dehydrogenase OS=Lactobacillus delbrueckii subsp. bulgaricus GN=gap PE=3 SV=1	Cytoplasmic Protein	1	53.1
Bacillus	Firmicutes	Paenibacillus polymyxa	sp|Q9H227|GBA3_HUMAN Cytosolic beta-glucosidase OS=Homo sapiens GN=GBA3 PE=1 SV=2	sp|P22073|BGLA_PAEPO Beta-glucosidase A OS=Paenibacillus polymyxa GN=bglA PE=1 SV=1	Cytoplasmic Protein	4	90.2
Bacillus	Firmicutes	Bacillus cereus	sp|P07954|FUMH_HUMAN Fumarate hydratase, mitochondrial OS=Homo sapiens GN=FH PE=1 SV=3	sp|Q81F85|FUMC_BACCR Fumarate hydratase class II OS=Bacillus cereus (strain ATCC 14579 / DSM 31 / JCM 2152 / NBRC 15305 / NCIMB 9373 / NRRL B-3711) GN=fumC PE=3 SV=1	Cytoplasmic Protein	4	90.2
Bacillus	Firmicutes	Bacillus subtilis	sp|P07954|FUMH_HUMAN Fumarate hydratase, mitochondrial OS=Homo sapiens GN=FH PE=1 SV=3	sp|P07343|FUMC_BACSU Fumarate hydratase class II OS=Bacillus subtilis (strain 168) GN=fumC PE=3 SV=2	Cytoplasmic Protein	4	90.2
Bacillus	Firmicutes	Bacillus anthracis	sp|P07954|FUMH_HUMAN Fumarate hydratase, mitochondrial OS=Homo sapiens GN=FH PE=1 SV=3	sp|Q81SA0|FUMC_BACAN Fumarate hydratase class II OS=Bacillus anthracis GN=fumC PE=3 SV=1	Cytoplasmic Protein	4	90.2
Bacillus	Firmicutes	Bacillus halodurans	sp|P07954|FUMH_HUMAN Fumarate hydratase, mitochondrial OS=Homo sapiens GN=FH PE=1 SV=3	sp|Q9KCX4|FUMC_BACHD Fumarate hydratase class II OS=Bacillus halodurans (strain ATCC BAA-125 / DSM 18197 / FERM 7344 / JCM 9153 / C-125) GN=fumC PE=3 SV=1	Cytoplasmic Protein	4	90.2
Bacillus	Firmicutes	Bacillus subtilis	sp|P07954|FUMH_HUMAN Fumarate hydratase, mitochondrial OS=Homo sapiens GN=FH PE=1 SV=3	sp|P26899|ASPA_BACSU Aspartate ammonia-lyase OS=Bacillus subtilis (strain 168) GN=ansB PE=3 SV=2	Cytoplasmic Protein	4	90.2
Bacillus	Firmicutes	Bacillus subtilis	sp|Q14376|GALE_HUMAN UDP-glucose 4-epimerase OS=Homo sapiens GN=GALE PE=1 SV=2	sp|P55180|GALE_BACSU UDP-glucose 4-epimerase OS=Bacillus subtilis (strain 168) GN=galE PE=3 SV=1	Cytoplasmic Protein	4	90.2
Bacillus	Firmicutes	Bacillus halodurans	sp|Q14376|GALE_HUMAN UDP-glucose 4-epimerase OS=Homo sapiens GN=GALE PE=1 SV=2	sp|Q9KDV3|GALE_BACHD UDP-glucose 4-epimerase OS=Bacillus halodurans (strain ATCC BAA-125 / DSM 18197 / FERM 7344 / JCM 9153 / C-125) GN=galE PE=3 SV=1	Cytoplasmic Protein	4	90.2
Bacillus	Firmicutes	Lactobacillus casei	sp|Q14376|GALE_HUMAN UDP-glucose 4-epimerase OS=Homo sapiens GN=GALE PE=1 SV=2	sp|O84903|GALE_LACCA UDP-glucose 4-epimerase OS=Lactobacillus casei GN=galE PE=3 SV=1	Cytoplasmic Protein	4	90.2
Bacillus	Firmicutes	Lactobacillus helveticus	sp|Q14376|GALE_HUMAN UDP-glucose 4-epimerase OS=Homo sapiens GN=GALE PE=1 SV=2	sp|Q7WTB1|GALE_LACHE UDP-glucose 4-epimerase OS=Lactobacillus helveticus GN=galE PE=2 SV=1	Cytoplasmic Protein	1	53.1
Bacillus	Firmicutes	Bacillus thermoamyloliquefaciens	sp|Q14697|GANAB_HUMAN Neutral alpha-glucosidase AB OS=Homo sapiens GN=GANAB PE=1 SV=3	sp|Q9F234|AGL2_BACTQ Alpha-glucosidase 2 OS=Bacillus thermoamyloliquefaciens PE=3 SV=1	Cytoplasmic Protein	3	71.1
Bacillus	Firmicutes	Bacillus methylotrophicus	sp|P30793|GCH1_HUMAN GTP cyclohydrolase 1 OS=Homo sapiens GN=GCH1 PE=1 SV=1	sp|A7Z630|GCH1_BACMF GTP cyclohydrolase 1 OS=Bacillus methylotrophicus (strain DSM 23117 / BGSC 10A6 / FZB42) GN=folE PE=3 SV=1	Cytoplasmic Protein	1	53.1
Bacillus	Firmicutes	Bacillus halodurans	sp|P30793|GCH1_HUMAN GTP cyclohydrolase 1 OS=Homo sapiens GN=GCH1 PE=1 SV=1	sp|Q9KCC7|GCH1_BACHD GTP cyclohydrolase 1 OS=Bacillus halodurans (strain ATCC BAA-125 / DSM 18197 / FERM 7344 / JCM 9153 / C-125) GN=folE PE=3 SV=1	Cytoplasmic Protein	4	90.2
Bacillus	Firmicutes	Bacillus pumilus	sp|P30793|GCH1_HUMAN GTP cyclohydrolase 1 OS=Homo sapiens GN=GCH1 PE=1 SV=1	sp|A8FEL2|GCH1_BACP2 GTP cyclohydrolase 1 OS=Bacillus pumilus (strain SAFR-032) GN=folE PE=3 SV=1	Cytoplasmic Protein	4	90.2
Bacillus	Firmicutes	Bacillus subtilis	sp|P30793|GCH1_HUMAN GTP cyclohydrolase 1 OS=Homo sapiens GN=GCH1 PE=1 SV=1	sp|P19465|GCH1_BACSU GTP cyclohydrolase 1 OS=Bacillus subtilis (strain 168) GN=folE PE=1 SV=1	Cytoplasmic Protein	1	53.1
Bacillus	Firmicutes	Bacillus cytotoxicus	sp|P30793|GCH1_HUMAN GTP cyclohydrolase 1 OS=Homo sapiens GN=GCH1 PE=1 SV=1	sp|A7GN48|GCH1_BACCN GTP cyclohydrolase 1 OS=Bacillus cytotoxicus (strain DSM 22905 / CIP 110041 / 391-98 / NVH 391-98) GN=folE PE=3 SV=1	Cytoplasmic Protein	4	90.2
Bacillus	Firmicutes	Bacillus weihenstephanensis	sp|P30793|GCH1_HUMAN GTP cyclohydrolase 1 OS=Homo sapiens GN=GCH1 PE=1 SV=1	sp|A9VMC0|GCH1_BACWK GTP cyclohydrolase 1 OS=Bacillus weihenstephanensis (strain KBAB4) GN=folE PE=3 SV=1	Cytoplasmic Protein	5	98.1
Bacillus	Firmicutes	Bacillus cereus	sp|P30793|GCH1_HUMAN GTP cyclohydrolase 1 OS=Homo sapiens GN=GCH1 PE=1 SV=1	sp|B9IVN3|GCH1_BACCQ GTP cyclohydrolase 1 OS=Bacillus cereus (strain Q1) GN=folE PE=3 SV=1	Cytoplasmic Protein	1	53.1
Bacillus	Firmicutes	Bacillus thuringiensis	sp|P30793|GCH1_HUMAN GTP cyclohydrolase 1 OS=Homo sapiens GN=GCH1 PE=1 SV=1	sp|Q6HL44|GCH1_BACHK GTP cyclohydrolase 1 OS=Bacillus thuringiensis subsp. konkukian (strain 97-27) GN=folE PE=3 SV=1	Cytoplasmic Protein	4	90.2
Bacillus	Firmicutes	Bacillus cereus	sp|P30793|GCH1_HUMAN GTP cyclohydrolase 1 OS=Homo sapiens GN=GCH1 PE=1 SV=1	sp|Q63DM1|GCH1_BACCZ GTP cyclohydrolase 1 OS=Bacillus cereus (strain ZK / E33L) GN=folE PE=3 SV=1	Cytoplasmic Protein	1	53.1
Bacillus	Firmicutes	Bacillus cereus	sp|P30793|GCH1_HUMAN GTP cyclohydrolase 1 OS=Homo sapiens GN=GCH1 PE=1 SV=1	sp|Q81FQ8|GCH1_BACCR GTP cyclohydrolase 1 OS=Bacillus cereus (strain ATCC 14579 / DSM 31 / JCM 2152 / NBRC 15305 / NCIMB 9373 / NRRL B-3711) GN=folE PE=3 SV=1	Cytoplasmic Protein	5	98.1
Bacillus	Firmicutes	Bacillus cereus	sp|P30793|GCH1_HUMAN GTP cyclohydrolase 1 OS=Homo sapiens GN=GCH1 PE=1 SV=1	sp|C1EN08|GCH1_BACC3 GTP cyclohydrolase 1 OS=Bacillus cereus (strain 03BB102) GN=folE PE=3 SV=1	Cytoplasmic Protein	5	98.1
Bacillus	Firmicutes	Bacillus cereus	sp|P30793|GCH1_HUMAN GTP cyclohydrolase 1 OS=Homo sapiens GN=GCH1 PE=1 SV=1	sp|B7HL21|GCH1_BACC7 GTP cyclohydrolase 1 OS=Bacillus cereus (strain AH187) GN=folE PE=3 SV=1	Cytoplasmic Protein	1	53.1
Bacillus	Firmicutes	Bacillus cereus	sp|P30793|GCH1_HUMAN GTP cyclohydrolase 1 OS=Homo sapiens GN=GCH1 PE=1 SV=1	sp|Q73AY4|GCH1_BACC1 GTP cyclohydrolase 1 OS=Bacillus cereus (strain ATCC 10987 / NRS 248) GN=folE PE=3 SV=1	Cytoplasmic Protein	4	90.2
Bacillus	Firmicutes	Bacillus cereus	sp|P30793|GCH1_HUMAN GTP cyclohydrolase 1 OS=Homo sapiens GN=GCH1 PE=1 SV=1	sp|B7HHR5|GCH1_BACC4 GTP cyclohydrolase 1 OS=Bacillus cereus (strain B4264) GN=folE PE=3 SV=1	Cytoplasmic Protein	4	90.2
Bacillus	Firmicutes	Bacillus cereus	sp|P30793|GCH1_HUMAN GTP cyclohydrolase 1 OS=Homo sapiens GN=GCH1 PE=1 SV=1	sp|B7IP89|GCH1_BACC2 GTP cyclohydrolase 1 OS=Bacillus cereus (strain G9842) GN=folE PE=3 SV=1	Cytoplasmic Protein	4	90.2
Bacillus	Firmicutes	Bacillus cereus	sp|P30793|GCH1_HUMAN GTP cyclohydrolase 1 OS=Homo sapiens GN=GCH1 PE=1 SV=1	sp|B7JGZ6|GCH1_BACC0 GTP cyclohydrolase 1 OS=Bacillus cereus (strain AH820) GN=folE PE=3 SV=1	Cytoplasmic Protein	1	53.1
Bacillus	Firmicutes	Bacillus anthracis	sp|P30793|GCH1_HUMAN GTP cyclohydrolase 1 OS=Homo sapiens GN=GCH1 PE=1 SV=1	sp|Q81SW2|GCH1_BACAN GTP cyclohydrolase 1 OS=Bacillus anthracis GN=folE PE=3 SV=1	Cytoplasmic Protein	4	90.2
Bacillus	Firmicutes	Bacillus anthracis	sp|P30793|GCH1_HUMAN GTP cyclohydrolase 1 OS=Homo sapiens GN=GCH1 PE=1 SV=1	sp|C3L8S8|GCH1_BACAC GTP cyclohydrolase 1 OS=Bacillus anthracis (strain CDC 684 / NRRL 3495) GN=folE PE=3 SV=1	Cytoplasmic Protein	4	90.2
Bacillus	Firmicutes	Bacillus anthracis	sp|P30793|GCH1_HUMAN GTP cyclohydrolase 1 OS=Homo sapiens GN=GCH1 PE=1 SV=1	sp|C3P598|GCH1_BACAA GTP cyclohydrolase 1 OS=Bacillus anthracis (strain A0248) GN=folE PE=3 SV=1	Cytoplasmic Protein	1	53.1
Bacillus	Firmicutes	Bacillus thuringiensis	sp|P30793|GCH1_HUMAN GTP cyclohydrolase 1 OS=Homo sapiens GN=GCH1 PE=1 SV=1	sp|A0RBW5|GCH1_BACAH GTP cyclohydrolase 1 OS=Bacillus thuringiensis (strain Al Hakam) GN=folE PE=3 SV=1	Cytoplasmic Protein	1	53.1
Bacillus	Firmicutes	Lactobacillus brevis	sp|Q9H0R6|GATA_HUMAN Glutamyl-tRNA(Gln) amidotransferase subunit A, mitochondrial OS=Homo sapiens GN=QRSL1 PE=1 SV=2	sp|Q03Q16|GATA_LACBA Glutamyl-tRNA(Gln) amidotransferase subunit A OS=Lactobacillus brevis (strain ATCC 367 / JCM 1170) GN=gatA PE=3 SV=1	Cytoplasmic Protein	4	90.2
Bacillus	Firmicutes	Lactobacillus fermentum	sp|Q9H0R6|GATA_HUMAN Glutamyl-tRNA(Gln) amidotransferase subunit A, mitochondrial OS=Homo sapiens GN=QRSL1 PE=1 SV=2	sp|B2GDS6|GATA_LACF3 Glutamyl-tRNA(Gln) amidotransferase subunit A OS=Lactobacillus fermentum (strain NBRC 3956 / LMG 18251) GN=gatA PE=3 SV=1	Cytoplasmic Protein	4	90.2
Bacillus	Firmicutes	Lactobacillus casei	sp|Q9H0R6|GATA_HUMAN Glutamyl-tRNA(Gln) amidotransferase subunit A, mitochondrial OS=Homo sapiens GN=QRSL1 PE=1 SV=2	sp|B3WD57|GATA_LACCB Glutamyl-tRNA(Gln) amidotransferase subunit A OS=Lactobacillus casei (strain BL23) GN=gatA PE=3 SV=1	Cytoplasmic Protein	4	90.2
Bacillus	Firmicutes	Lactobacillus sakei	sp|Q9H0R6|GATA_HUMAN Glutamyl-tRNA(Gln) amidotransferase subunit A, mitochondrial OS=Homo sapiens GN=QRSL1 PE=1 SV=2	sp|Q38VC9|GATA_LACSS Glutamyl-tRNA(Gln) amidotransferase subunit A OS=Lactobacillus sakei subsp. sakei (strain 23K) GN=gatA PE=3 SV=1	Periplasmic Protein	1	53.1
Bacillus	Firmicutes	Lactobacillus casei	sp|Q9H0R6|GATA_HUMAN Glutamyl-tRNA(Gln) amidotransferase subunit A, mitochondrial OS=Homo sapiens GN=QRSL1 PE=1 SV=2	sp|Q03AC0|GATA_LACC3 Glutamyl-tRNA(Gln) amidotransferase subunit A OS=Lactobacillus casei (strain ATCC 334) GN=gatA PE=3 SV=1	Cytoplasmic Protein	4	90.2
Bacillus	Firmicutes	Lactobacillus johnsonii	sp|Q9H0R6|GATA_HUMAN Glutamyl-tRNA(Gln) amidotransferase subunit A, mitochondrial OS=Homo sapiens GN=QRSL1 PE=1 SV=2	sp|Q74I52|GATA_LACJO Glutamyl-tRNA(Gln) amidotransferase subunit A OS=Lactobacillus johnsonii (strain CNCM I-12250 / La1 / NCC 533) GN=gatA PE=3 SV=1	Cytoplasmic Protein	1	53.1
Bacillus	Firmicutes	Lactobacillus plantarum	sp|Q9H0R6|GATA_HUMAN Glutamyl-tRNA(Gln) amidotransferase subunit A, mitochondrial OS=Homo sapiens GN=QRSL1 PE=1 SV=2	sp|Q88XP7|GATA_LACPL Glutamyl-tRNA(Gln) amidotransferase subunit A OS=Lactobacillus plantarum (strain ATCC BAA-793 / NCIMB 8826 / WCFS1) GN=gatA PE=3 SV=1	Cytoplasmic Protein	1	53.1
Bacillus	Firmicutes	Lactobacillus gasseri	sp|Q9H0R6|GATA_HUMAN Glutamyl-tRNA(Gln) amidotransferase subunit A, mitochondrial OS=Homo sapiens GN=QRSL1 PE=1 SV=2	sp|Q041K5|GATA_LACGA Glutamyl-tRNA(Gln) amidotransferase subunit A OS=Lactobacillus gasseri (strain ATCC 33323 / DSM 20243 / JCM 1131 / NCIMB 11718 / AM63) GN=gatA PE=3 SV=1	Cytoplasmic Protein	2	68.1
Bacillus	Firmicutes	Lactobacillus reuteri	sp|Q9H0R6|GATA_HUMAN Glutamyl-tRNA(Gln) amidotransferase subunit A, mitochondrial OS=Homo sapiens GN=QRSL1 PE=1 SV=2	sp|B2G8T6|GATA_LACRJ Glutamyl-tRNA(Gln) amidotransferase subunit A OS=Lactobacillus reuteri (strain JCM 1112) GN=gatA PE=3 SV=1	Cytoplasmic Protein	4	90.2
Bacillus	Firmicutes	Lactobacillus reuteri	sp|Q9H0R6|GATA_HUMAN Glutamyl-tRNA(Gln) amidotransferase subunit A, mitochondrial OS=Homo sapiens GN=QRSL1 PE=1 SV=2	sp|A5VLG3|GATA_LACRD Glutamyl-tRNA(Gln) amidotransferase subunit A OS=Lactobacillus reuteri (strain DSM 20016) GN=gatA PE=3 SV=1	Cytoplasmic Protein	4	90.2
Bacillus	Firmicutes	Lactobacillus acidophilus	sp|Q9H0R6|GATA_HUMAN Glutamyl-tRNA(Gln) amidotransferase subunit A, mitochondrial OS=Homo sapiens GN=QRSL1 PE=1 SV=2	sp|Q5FLL1|GATA_LACAC Glutamyl-tRNA(Gln) amidotransferase subunit A OS=Lactobacillus acidophilus (strain ATCC 700396 / NCK56 / N2 / NCFM) GN=gatA PE=3 SV=1	Cytoplasmic Protein	4	90.2
Bacillus	Firmicutes	Lactobacillus helveticus	sp|Q9H0R6|GATA_HUMAN Glutamyl-tRNA(Gln) amidotransferase subunit A, mitochondrial OS=Homo sapiens GN=QRSL1 PE=1 SV=2	sp|A8YTZ6|GATA_LACH4 Glutamyl-tRNA(Gln) amidotransferase subunit A OS=Lactobacillus helveticus (strain DPC 4571) GN=gatA PE=3 SV=1	Cytoplasmic Protein	4	90.2
Bacillus	Firmicutes	Lactobacillus delbrueckii	sp|Q9H0R6|GATA_HUMAN Glutamyl-tRNA(Gln) amidotransferase subunit A, mitochondrial OS=Homo sapiens GN=QRSL1 PE=1 SV=2	sp|Q04BV7|GATA_LACDB Glutamyl-tRNA(Gln) amidotransferase subunit A OS=Lactobacillus delbrueckii subsp. bulgaricus (strain ATCC BAA-365) GN=gatA PE=3 SV=1	Cytoplasmic Protein	4	90.2
Bacillus	Firmicutes	Lactobacillus delbrueckii	sp|Q9H0R6|GATA_HUMAN Glutamyl-tRNA(Gln) amidotransferase subunit A, mitochondrial OS=Homo sapiens GN=QRSL1 PE=1 SV=2	sp|Q1GBF4|GATA_LACDA Glutamyl-tRNA(Gln) amidotransferase subunit A OS=Lactobacillus delbrueckii subsp. bulgaricus (strain ATCC 11842 / DSM 20081 / JCM 1002 / NBRC 13953 / NCIMB 11778) GN=gatA PE=3 SV=1	Cytoplasmic Protein	4	90.2
Bacillus	Firmicutes	Bacillus halodurans	sp|P23378|GCSP_HUMAN Glycine dehydrogenase (decarboxylating), mitochondrial OS=Homo sapiens GN=GLDC PE=1 SV=2	sp|Q9K936|GCSPB_BACHD Probable glycine dehydrogenase (decarboxylating) subunit 2 OS=Bacillus halodurans (strain ATCC BAA-125 / DSM 18197 / FERM 7344 / JCM 9153 / C-125) GN=gcvPB PE=3 SV=1	Cytoplasmic Protein	1	53.1
Bacillus	Firmicutes	Bacillus clausii	sp|P23378|GCSP_HUMAN Glycine dehydrogenase (decarboxylating), mitochondrial OS=Homo sapiens GN=GLDC PE=1 SV=2	sp|Q5WF32|GCSPB_BACSK Probable glycine dehydrogenase (decarboxylating) subunit 2 OS=Bacillus clausii (strain KSM-K16) GN=gcvPB PE=3 SV=1	Cytoplasmic Protein	4	90.2
Bacillus	Firmicutes	Bacillus cereus	sp|P23378|GCSP_HUMAN Glycine dehydrogenase (decarboxylating), mitochondrial OS=Homo sapiens GN=GLDC PE=1 SV=2	sp|P62029|GCSPB_BACC1 Probable glycine dehydrogenase (decarboxylating) subunit 2 OS=Bacillus cereus (strain ATCC 10987 / NRS 248) GN=gcvPB PE=3 SV=1	Cytoplasmic Protein	4	90.2
Bacillus	Firmicutes	Bacillus methylotrophicus	sp|P23378|GCSP_HUMAN Glycine dehydrogenase (decarboxylating), mitochondrial OS=Homo sapiens GN=GLDC PE=1 SV=2	sp|A7Z6M2|GCSPB_BACMF Probable glycine dehydrogenase (decarboxylating) subunit 2 OS=Bacillus methylotrophicus (strain DSM 23117 / BGSC 10A6 / FZB42) GN=gcvPB PE=3 SV=1	Cytoplasmic Protein	4	90.2
Bacillus	Firmicutes	Bacillus cytotoxicus	sp|P23378|GCSP_HUMAN Glycine dehydrogenase (decarboxylating), mitochondrial OS=Homo sapiens GN=GLDC PE=1 SV=2	sp|A7GSN6|GCSPB_BACCN Probable glycine dehydrogenase (decarboxylating) subunit 2 OS=Bacillus cytotoxicus (strain DSM 22905 / CIP 110041 / 391-98 / NVH 391-98) GN=gcvPB PE=3 SV=1	Cytoplasmic Protein	4	90.2
Bacillus	Firmicutes	Bacillus thuringiensis	sp|P23378|GCSP_HUMAN Glycine dehydrogenase (decarboxylating), mitochondrial OS=Homo sapiens GN=GLDC PE=1 SV=2	sp|A0RIK9|GCSPB_BACAH Probable glycine dehydrogenase (decarboxylating) subunit 2 OS=Bacillus thuringiensis (strain Al Hakam) GN=gcvPB PE=3 SV=1	Cytoplasmic Protein	1	53.1
Bacillus	Firmicutes	Bacillus cereus	sp|P23378|GCSP_HUMAN Glycine dehydrogenase (decarboxylating), mitochondrial OS=Homo sapiens GN=GLDC PE=1 SV=2	sp|Q634V8|GCSPB_BACCZ Probable glycine dehydrogenase (decarboxylating) subunit 2 OS=Bacillus cereus (strain ZK / E33L) GN=gcvPB PE=3 SV=1	Cytoplasmic Protein	4	90.2
Bacillus	Firmicutes	Bacillus thuringiensis	sp|P23378|GCSP_HUMAN Glycine dehydrogenase (decarboxylating), mitochondrial OS=Homo sapiens GN=GLDC PE=1 SV=2	sp|Q6HDT8|GCSPB_BACHK Probable glycine dehydrogenase (decarboxylating) subunit 2 OS=Bacillus thuringiensis subsp. konkukian (strain 97-27) GN=gcvPB PE=3 SV=1	Cytoplasmic Protein	4	90.2
Bacillus	Firmicutes	Bacillus cereus	sp|P23378|GCSP_HUMAN Glycine dehydrogenase (decarboxylating), mitochondrial OS=Homo sapiens GN=GLDC PE=1 SV=2	sp|C1ERU8|GCSPB_BACC3 Probable glycine dehydrogenase (decarboxylating) subunit 2 OS=Bacillus cereus (strain 03BB102) GN=gcvPB PE=3 SV=1	Cytoplasmic Protein	4	90.2
Bacillus	Firmicutes	Bacillus anthracis	sp|P23378|GCSP_HUMAN Glycine dehydrogenase (decarboxylating), mitochondrial OS=Homo sapiens GN=GLDC PE=1 SV=2	sp|Q81M08|GCSPB_BACAN Probable glycine dehydrogenase (decarboxylating) subunit 2 OS=Bacillus anthracis GN=gcvPB PE=3 SV=1	Cytoplasmic Protein	4	90.2
Bacillus	Firmicutes	Bacillus anthracis	sp|P23378|GCSP_HUMAN Glycine dehydrogenase (decarboxylating), mitochondrial OS=Homo sapiens GN=GLDC PE=1 SV=2	sp|C3P8D3|GCSPB_BACAA Probable glycine dehydrogenase (decarboxylating) subunit 2 OS=Bacillus anthracis (strain A0248) GN=gcvPB PE=3 SV=1	Cytoplasmic Protein	4	90.2
Bacillus	Firmicutes	Bacillus anthracis	sp|P23378|GCSP_HUMAN Glycine dehydrogenase (decarboxylating), mitochondrial OS=Homo sapiens GN=GLDC PE=1 SV=2	sp|C3LKQ2|GCSPB_BACAC Probable glycine dehydrogenase (decarboxylating) subunit 2 OS=Bacillus anthracis (strain CDC 684 / NRRL 3495) GN=gcvPB PE=3 SV=1	Cytoplasmic Protein	4	90.2
Bacillus	Firmicutes	Bacillus cereus	sp|P23378|GCSP_HUMAN Glycine dehydrogenase (decarboxylating), mitochondrial OS=Homo sapiens GN=GLDC PE=1 SV=2	sp|B7JMU9|GCSPB_BACC0 Probable glycine dehydrogenase (decarboxylating) subunit 2 OS=Bacillus cereus (strain AH820) GN=gcvPB PE=3 SV=1	Cytoplasmic Protein	4	90.2
Bacillus	Firmicutes	Bacillus cereus	sp|P23378|GCSP_HUMAN Glycine dehydrogenase (decarboxylating), mitochondrial OS=Homo sapiens GN=GLDC PE=1 SV=2	sp|B7HNY9|GCSPB_BACC7 Probable glycine dehydrogenase (decarboxylating) subunit 2 OS=Bacillus cereus (strain AH187) GN=gcvPB PE=3 SV=1	Cytoplasmic Protein	1	53.1
Bacillus	Firmicutes	Bacillus cereus	sp|P23378|GCSP_HUMAN Glycine dehydrogenase (decarboxylating), mitochondrial OS=Homo sapiens GN=GLDC PE=1 SV=2	sp|B9IXL7|GCSPB_BACCQ Probable glycine dehydrogenase (decarboxylating) subunit 2 OS=Bacillus cereus (strain Q1) GN=gcvPB PE=3 SV=1	Cytoplasmic Protein	4	90.2
Bacillus	Firmicutes	Bacillus cereus	sp|P23378|GCSP_HUMAN Glycine dehydrogenase (decarboxylating), mitochondrial OS=Homo sapiens GN=GLDC PE=1 SV=2	sp|B7IXL2|GCSPB_BACC2 Probable glycine dehydrogenase (decarboxylating) subunit 2 OS=Bacillus cereus (strain G9842) GN=gcvPB PE=3 SV=1	Cytoplasmic Protein	1	53.1
Bacillus	Firmicutes	Bacillus weihenstephanensis	sp|P23378|GCSP_HUMAN Glycine dehydrogenase (decarboxylating), mitochondrial OS=Homo sapiens GN=GLDC PE=1 SV=2	sp|A9VH10|GCSPB_BACWK Probable glycine dehydrogenase (decarboxylating) subunit 2 OS=Bacillus weihenstephanensis (strain KBAB4) GN=gcvPB PE=3 SV=1	Cytoplasmic Protein	1	53.1
Bacillus	Firmicutes	Bacillus cereus	sp|P23378|GCSP_HUMAN Glycine dehydrogenase (decarboxylating), mitochondrial OS=Homo sapiens GN=GLDC PE=1 SV=2	sp|B7HB98|GCSPB_BACC4 Probable glycine dehydrogenase (decarboxylating) subunit 2 OS=Bacillus cereus (strain B4264) GN=gcvPB PE=3 SV=1	Cytoplasmic Protein	4	90.2
Bacillus	Firmicutes	Bacillus subtilis	sp|P23378|GCSP_HUMAN Glycine dehydrogenase (decarboxylating), mitochondrial OS=Homo sapiens GN=GLDC PE=1 SV=2	sp|P54377|GCSPB_BACSU Probable glycine dehydrogenase (decarboxylating) subunit 2 OS=Bacillus subtilis (strain 168) GN=gcvPB PE=3 SV=1	Cytoplasmic Protein	4	90.2
Bacillus	Firmicutes	Bacillus cereus	sp|P23378|GCSP_HUMAN Glycine dehydrogenase (decarboxylating), mitochondrial OS=Homo sapiens GN=GLDC PE=1 SV=2	sp|Q818M5|GCSPB_BACCR Probable glycine dehydrogenase (decarboxylating) subunit 2 OS=Bacillus cereus (strain ATCC 14579 / DSM 31 / JCM 2152 / NBRC 15305 / NCIMB 9373 / NRRL B-3711) GN=gcvPB PE=3 SV=1	Cytoplasmic Protein	4	90.2
Bacillus	Firmicutes	Bacillus licheniformis	sp|P23378|GCSP_HUMAN Glycine dehydrogenase (decarboxylating), mitochondrial OS=Homo sapiens GN=GLDC PE=1 SV=2	sp|Q65HG1|GCSPB_BACLD Probable glycine dehydrogenase (decarboxylating) subunit 2 OS=Bacillus licheniformis (strain ATCC 14580 / DSM 13 / JCM 2505 / NBRC 12200 / NCIMB 9375 / NRRL NRS-1264 / Gibson 46) GN=gcvPB PE=3 SV=1	Cytoplasmic Protein	4	90.2
Bacillus	Firmicutes	Bacillus subtilis	sp|P23378|GCSP_HUMAN Glycine dehydrogenase (decarboxylating), mitochondrial OS=Homo sapiens GN=GLDC PE=1 SV=2	sp|P54376|GCSPA_BACSU Probable glycine dehydrogenase (decarboxylating) subunit 1 OS=Bacillus subtilis (strain 168) GN=gcvPA PE=3 SV=2	Cytoplasmic Protein	4	90.2
Bacillus	Firmicutes	Bacillus cereus	sp|P23378|GCSP_HUMAN Glycine dehydrogenase (decarboxylating), mitochondrial OS=Homo sapiens GN=GLDC PE=1 SV=2	sp|Q730W2|GCSPA_BACC1 Probable glycine dehydrogenase (decarboxylating) subunit 1 OS=Bacillus cereus (strain ATCC 10987 / NRS 248) GN=gcvPA PE=3 SV=1	Cytoplasmic Protein	1	53.1
Bacillus	Firmicutes	Bacillus thuringiensis	sp|P23378|GCSP_HUMAN Glycine dehydrogenase (decarboxylating), mitochondrial OS=Homo sapiens GN=GLDC PE=1 SV=2	sp|Q6HDT7|GCSPA_BACHK Probable glycine dehydrogenase (decarboxylating) subunit 1 OS=Bacillus thuringiensis subsp. konkukian (strain 97-27) GN=gcvPA PE=3 SV=1	Cytoplasmic Protein	4	90.2
Bacillus	Firmicutes	Bacillus cereus	sp|P23378|GCSP_HUMAN Glycine dehydrogenase (decarboxylating), mitochondrial OS=Homo sapiens GN=GLDC PE=1 SV=2	sp|Q818M4|GCSPA_BACCR Probable glycine dehydrogenase (decarboxylating) subunit 1 OS=Bacillus cereus (strain ATCC 14579 / DSM 31 / JCM 2152 / NBRC 15305 / NCIMB 9373 / NRRL B-3711) GN=gcvPA PE=3 SV=1	Cytoplasmic Protein	4	90.2
Bacillus	Firmicutes	Bacillus cereus	sp|P23378|GCSP_HUMAN Glycine dehydrogenase (decarboxylating), mitochondrial OS=Homo sapiens GN=GLDC PE=1 SV=2	sp|B7HB99|GCSPA_BACC4 Probable glycine dehydrogenase (decarboxylating) subunit 1 OS=Bacillus cereus (strain B4264) GN=gcvPA PE=3 SV=1	Cytoplasmic Protein	1	53.1
Bacillus	Firmicutes	Bacillus cereus	sp|P23378|GCSP_HUMAN Glycine dehydrogenase (decarboxylating), mitochondrial OS=Homo sapiens GN=GLDC PE=1 SV=2	sp|B7IXL3|GCSPA_BACC2 Probable glycine dehydrogenase (decarboxylating) subunit 1 OS=Bacillus cereus (strain G9842) GN=gcvPA PE=3 SV=1	Cytoplasmic Protein	4	90.2
Bacillus	Firmicutes	Bacillus cereus	sp|P23378|GCSP_HUMAN Glycine dehydrogenase (decarboxylating), mitochondrial OS=Homo sapiens GN=GLDC PE=1 SV=2	sp|B9IXL8|GCSPA_BACCQ Probable glycine dehydrogenase (decarboxylating) subunit 1 OS=Bacillus cereus (strain Q1) GN=gcvPA PE=3 SV=1	Cytoplasmic Protein	1	53.1
Bacillus	Firmicutes	Bacillus cereus	sp|P23378|GCSP_HUMAN Glycine dehydrogenase (decarboxylating), mitochondrial OS=Homo sapiens GN=GLDC PE=1 SV=2	sp|B7HNZ0|GCSPA_BACC7 Probable glycine dehydrogenase (decarboxylating) subunit 1 OS=Bacillus cereus (strain AH187) GN=gcvPA PE=3 SV=1	Cytoplasmic Protein	4	90.2
Bacillus	Firmicutes	Bacillus cereus	sp|P23378|GCSP_HUMAN Glycine dehydrogenase (decarboxylating), mitochondrial OS=Homo sapiens GN=GLDC PE=1 SV=2	sp|Q634V7|GCSPA_BACCZ Probable glycine dehydrogenase (decarboxylating) subunit 1 OS=Bacillus cereus (strain ZK / E33L) GN=gcvPA PE=3 SV=1	Cytoplasmic Protein	4	90.2
Bacillus	Firmicutes	Bacillus cereus	sp|P23378|GCSP_HUMAN Glycine dehydrogenase (decarboxylating), mitochondrial OS=Homo sapiens GN=GLDC PE=1 SV=2	sp|C1ERU9|GCSPA_BACC3 Probable glycine dehydrogenase (decarboxylating) subunit 1 OS=Bacillus cereus (strain 03BB102) GN=gcvPA PE=3 SV=1	Cytoplasmic Protein	4	90.2
Bacillus	Firmicutes	Bacillus cereus	sp|P23378|GCSP_HUMAN Glycine dehydrogenase (decarboxylating), mitochondrial OS=Homo sapiens GN=GLDC PE=1 SV=2	sp|B7JMV0|GCSPA_BACC0 Probable glycine dehydrogenase (decarboxylating) subunit 1 OS=Bacillus cereus (strain AH820) GN=gcvPA PE=3 SV=1	Cytoplasmic Protein	4	90.2
Bacillus	Firmicutes	Bacillus thuringiensis	sp|P23378|GCSP_HUMAN Glycine dehydrogenase (decarboxylating), mitochondrial OS=Homo sapiens GN=GLDC PE=1 SV=2	sp|A0RIL0|GCSPA_BACAH Probable glycine dehydrogenase (decarboxylating) subunit 1 OS=Bacillus thuringiensis (strain Al Hakam) GN=gcvPA PE=3 SV=1	Cytoplasmic Protein	4	90.2
Bacillus	Firmicutes	Bacillus anthracis	sp|P23378|GCSP_HUMAN Glycine dehydrogenase (decarboxylating), mitochondrial OS=Homo sapiens GN=GLDC PE=1 SV=2	sp|Q81M07|GCSPA_BACAN Probable glycine dehydrogenase (decarboxylating) subunit 1 OS=Bacillus anthracis GN=gcvPA PE=3 SV=1	Cytoplasmic Protein	1	53.1
Bacillus	Firmicutes	Bacillus anthracis	sp|P23378|GCSP_HUMAN Glycine dehydrogenase (decarboxylating), mitochondrial OS=Homo sapiens GN=GLDC PE=1 SV=2	sp|C3LKQ3|GCSPA_BACAC Probable glycine dehydrogenase (decarboxylating) subunit 1 OS=Bacillus anthracis (strain CDC 684 / NRRL 3495) GN=gcvPA PE=3 SV=1	Cytoplasmic Protein	1	53.1
Bacillus	Firmicutes	Bacillus anthracis	sp|P23378|GCSP_HUMAN Glycine dehydrogenase (decarboxylating), mitochondrial OS=Homo sapiens GN=GLDC PE=1 SV=2	sp|C3P8D4|GCSPA_BACAA Probable glycine dehydrogenase (decarboxylating) subunit 1 OS=Bacillus anthracis (strain A0248) GN=gcvPA PE=3 SV=1	Cytoplasmic Protein	4	90.2
[truncated: 14,220 more rows]
